# Supplementary material for: Coordinated regulation of gene expression in Plasmodium female gametocytes by two transcription factors
Source: eLife journal article supplement (doi:10.7554/elife.88317), 2023-05-31

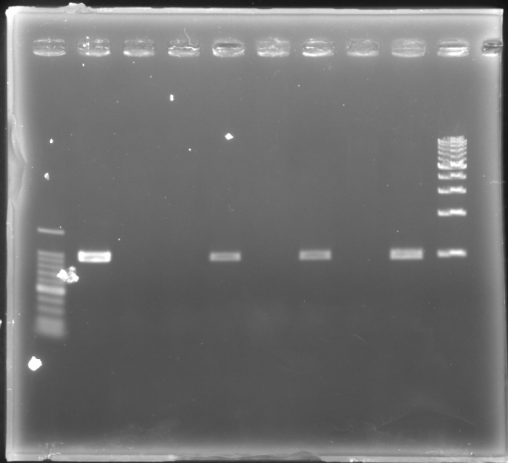

Supplement: fig2-figsupp1-data1 [file elife-88317-fig2-figsupp1-data1-v1.pdf]
