# Supplementary material for: Coordinated regulation of gene expression in Plasmodium female gametocytes by two transcription factors
Source: eLife. 2024 Jan 22;12:RP88317. doi: 10.7554/eLife.88317 (PMC10945693; doi:10.7554/eLife.88317)
Supplement: Supplementary file 1. [file elife-88317-supp1.xlsx]

## Sheet: S1
Supplementary file 1. Differential expression analysis between WT and PFG(-)
ID	annotation	log2(fold change)	p-value adj	sex-specificity	targets of PFG/cAP2-FG	targets of sAP2-FG
PBANKA_0417200	PH domain-containing protein	-10.0863	4.93008e-250	female	●
PBANKA_1233600	secreted ookinete protein, putative	-9.12662	2.83582e-183	female	●
PBANKA_0606200	blood stage antigen 41-3 precursor, putative	-8.86099	1.03841e-265	female	●
PBANKA_1338100	conserved protein, unknown function	-8.21927	8.906e-148	female	●
PBANKA_1419300	conserved Plasmodium protein, unknown function	-8.04407	1e-300	female	●
PBANKA_1342300	conserved protein, unknown function	-7.96631	1.83073e-207	female	●
PBANKA_1129000	secreted ookinete protein, putative	-7.94635	1.86409e-143	female	●
PBANKA_0502650	conserved Plasmodium protein, unknown function	-7.5678	2.07426e-174	female	●	●
PBANKA_0821200	conserved Plasmodium protein, unknown function	-7.50379	5.23207e-164	female	●
PBANKA_1460700	dipeptidyl aminopeptidase 2	-7.09958	3.60024e-191	female	●
PBANKA_1437700	conserved Plasmodium protein, unknown function	-6.99584	2.81077e-182	female	●
PBANKA_1110200	conserved Plasmodium protein, unknown function	-6.64463	1.76622e-205	female	●
PBANKA_1026000	conserved protein, unknown function	-6.63232	3.04441e-96	female	●
PBANKA_1362800	conserved Plasmodium protein, unknown function	-6.48921	8.28568e-97	female	●
PBANKA_0512000	palmitoyltransferase DHHC10	-6.46069	6.69405e-97	female	●
PBANKA_1123200	CPW-WPC family protein	-6.3867	2.63234e-101	female	●
PBANKA_0812900	conserved Plasmodium protein, unknown function	-6.34743	2.02992e-121	female	●
PBANKA_1453900	conserved protein, unknown function	-6.31572	2.44163e-115	female	●
PBANKA_1325400	conserved Plasmodium protein, unknown function	-6.29991	1.30163e-94	female	●
PBANKA_1421700	secreted ookinete protein, putative	-6.02027	7.88268e-146	female	●
PBANKA_1436300	conserved Plasmodium protein, unknown function	-5.92294	1.89102e-117	female	●
PBANKA_0522300	conserved Plasmodium protein, unknown function	-5.90466	2.31453e-10	female	●
PBANKA_1317200	NAD(P) transhydrogenase, putative	-5.87554	3.00903e-159	female	●
PBANKA_1329900	conserved Plasmodium protein, unknown function	-5.85157	1.18756e-113	female	●
PBANKA_0515000	ookinete surface protein P25	-5.56866	1.03653e-66	female	●	●
PBANKA_0823200	conserved protein, unknown function	-5.5535	1.33897e-115	female	●	●
PBANKA_1363600	conserved Plasmodium protein, unknown function	-5.53059	4.86972e-149	female	●
PBANKA_1329400	conserved protein, unknown function	-5.4755	1.24755e-100	female	●
PBANKA_0203600	conserved Plasmodium protein, unknown function	-5.38245	1.76423e-98	female	●
PBANKA_1138600	conserved protein, unknown function	-5.37983	7.75445e-119	female	●
PBANKA_0504400	conserved Plasmodium protein, unknown function	-5.31761	1.63027e-150	female	●
PBANKA_0110800	conserved Plasmodium protein, unknown function	-5.26992	4.15667e-92	female	●
PBANKA_1430300	conserved Plasmodium protein, unknown function	-5.26322	5.88639e-77	female	●
PBANKA_0605800	LIMP protein	-5.20326	1.60563e-74	female	●
PBANKA_1315300	LCCL domain-containing protein	-5.14257	6.09023e-136	female
PBANKA_0417600	LCCL domain-containing protein	-5.13967	4.16357e-157	female	●
PBANKA_1137400	conserved Plasmodium protein, unknown function	-5.11403	5.8438e-76	female	●
PBANKA_1231300	major facilitator superfamily domain-containing protein, putative	-5.1019	4.09419e-60	female	●
PBANKA_0409700	plasmepsin VI, putative	-5.08487	1.27067e-51	female	●
PBANKA_0912500	conserved Plasmodium protein, unknown function	-5.08238	5.00106e-93	female	●
PBANKA_1319000	conserved protein, unknown function	-5.08087	4.34287e-33	female
PBANKA_0720900	MOLO1 domain-containing protein, putative	-4.99591	2.33974e-74	female	●
PBANKA_0800300	conserved Plasmodium protein, unknown function	-4.92147	3.20317e-75	other
PBANKA_1318600	conserved protein, unknown function	-4.90962	3.44639e-47	female	●
PBANKA_0612400	conserved Plasmodium protein, unknown function	-4.89834	3.26636e-124	female	●	●
PBANKA_1203800	DnaJ protein, putative	-4.85447	9.65686e-05	other
PBANKA_0703300	conserved Plasmodium protein, unknown function	-4.8276	1.60698e-82	female	●
PBANKA_0706700	dicarboxylate/tricarboxylate carrier, putative	-4.81389	2.90541e-86	female	●
PBANKA_0603300	sexual stage-specific protein G37	-4.8117	2.02344e-84	female	●
PBANKA_0712900	high mobility group protein B2	-4.80743	3.57788e-46	female	●	●
PBANKA_0301600	conserved Plasmodium protein, unknown function	-4.74906	4.4589e-84	female	●
PBANKA_0407300	conserved Plasmodium protein, unknown function	-4.68306	1.76806e-66	female	●
PBANKA_0704800	conserved protein, unknown function	-4.51521	1.87669e-125	female	●
PBANKA_1335000	conserved Plasmodium protein, unknown function	-4.5022	4.0909e-86	female	●
PBANKA_0902900	conserved protein, unknown function	-4.49374	5.83804e-54	female	●
PBANKA_0901900	tubulin--tyrosine ligase, putative	-4.47396	5.42849e-61	female	●
PBANKA_1360400	conserved protein, unknown function	-4.46292	8.6113e-55	female	●	●
PBANKA_1421500	conserved Plasmodium protein, unknown function	-4.43344	3.11675e-55	female	●
PBANKA_1145200	conserved Plasmodium protein, unknown function	-4.38982	8.94221e-146	female	●
PBANKA_1319500	LCCL domain-containing protein	-4.36778	2.15077e-189	female	●
PBANKA_1243500	conserved protein, unknown function	-4.35699	1.23432e-49	female	●
PBANKA_0815400	conserved protein, unknown function	-4.34024	1.30075e-65	female	●
PBANKA_1040100	choline kinase	-4.30693	1.83896e-133	female
PBANKA_1245200	CPW-WPC family protein	-4.29915	4.87056e-53	female	●
PBANKA_1015400	CPW-WPC family protein	-4.29606	1.23565e-50	female	●
PBANKA_1357900	conserved Plasmodium protein, unknown function	-4.27485	2.62961e-72	female	●
PBANKA_1415200	conserved protein, unknown function	-4.26767	7.86829e-90	female	●
PBANKA_0402500	phosphatidylethanolamine-binding protein, putative	-4.12781	2.72009e-61	female	●
PBANKA_1346300	CPW-WPC family protein	-4.08763	1.83369e-114	female	●
PBANKA_0812600	conserved Plasmodium protein, unknown function	-4.02996	7.42509e-74	female	●	●
PBANKA_0810700	subpellicular microtubule protein 1, putative	-4.00515	1.10189e-63	female	●	●
PBANKA_1002100	6-cysteine protein P36	-3.96776	8.54334e-53	female	●
PBANKA_1427100	aquaporin, putative	-3.96758	6.4171e-59	female	●
PBANKA_0704900	crystalloid-specific PH domain-containing protein, putative	-3.94551	1.30614e-90	female	●
PBANKA_1329100	plasmepsin VIII	-3.94096	1.52675e-45	female	●
PBANKA_0819000	glideosome-associated protein 50, putative	-3.9001	3.18098e-52	female	●
PBANKA_1414800	conserved Plasmodium protein, unknown function	-3.88086	3.12715e-53	female	●
PBANKA_0830700	procollagen lysine 5-dioxygenase, putative	-3.84285	2.37921e-34	female	●
PBANKA_1463300	conserved Plasmodium protein, unknown function	-3.82801	1.15412e-93	female	●
PBANKA_1422900	conserved protein, unknown function	-3.797	3.29116e-43	female	●	●
PBANKA_1352500	CPW-WPC family protein	-3.79624	3.37514e-50	female	●
PBANKA_1338900	glideosome associated protein with multiple membrane spans 1, putative	-3.76877	1.70152e-41	female	●	●
PBANKA_1225300	conserved Plasmodium protein, unknown function	-3.76135	2.64145e-42	female	●
PBANKA_1334700	transmembrane protein 43, putative	-3.74323	3.16445e-52	female	●
PBANKA_0902300	conserved Plasmodium protein, unknown function	-3.71246	3.31837e-35	female	●	●
PBANKA_1115300	glideosome-associated protein 40, putative	-3.68881	6.61006e-41	female	●	●
PBANKA_0502700	pre-mRNA-splicing factor RDS3, putative	-3.62372	4.14824e-63	other
PBANKA_1124000	sphingomyelin synthase 2, putative	-3.58751	1.71174e-44	female
PBANKA_0824200	perforin-like protein 3	-3.58541	4.97158e-68	female
PBANKA_0517600	plasmepsin VII	-3.5523	1.68558e-52	female	●
PBANKA_1300700	LCCL domain-containing protein	-3.5159	5.68529e-64	female	●
PBANKA_1109300	conserved Plasmodium protein, unknown function	-3.48112	1.32379e-42	female	●
PBANKA_0703500	conserved Plasmodium protein, unknown function	-3.46604	2.55842e-28	female	●
PBANKA_1338200	beta-hydroxyacyl-ACP dehydratase, putative	-3.46288	1.29611e-32	female
PBANKA_1229900	conserved protein, unknown function	-3.43233	8.51379e-64	female	●
PBANKA_0518500	ADP-ribosylation factor, putative	-3.41234	1.74684e-28	female
PBANKA_1035400	glideosome associated protein with multiple membrane spans 3, putative	-3.40832	3.03233e-38	female	●	●
PBANKA_1104100	MOLO1 domain-containing protein, putative	-3.39278	2.42263e-26	female
PBANKA_1237200	50S ribosomal protein L17, apicoplast, putative	-3.36665	6.69333e-28	other	●
PBANKA_0825500	conserved Plasmodium protein, unknown function	-3.35141	1.76545e-36	female	●
PBANKA_1134900	zinc finger protein, putative	-3.33944	1.19067e-68	female	●
PBANKA_1142000	conserved protein, unknown function	-3.32947	3.96983e-27	female
PBANKA_1106000	conserved Plasmodium protein, unknown function	-3.32666	1.27403e-36	female	●
PBANKA_1110600	conserved Plasmodium protein, unknown function	-3.32433	6.06017e-29	female
PBANKA_1325200	meiotic nuclear division protein 1, putative	-3.28638	2.77639e-38	female	●
PBANKA_1138900	conserved Plasmodium protein, unknown function	-3.27741	2.115e-41	female
PBANKA_0704700	conserved Plasmodium protein, unknown function	-3.25211	2.45489e-86	female	●	●
PBANKA_1119200	secreted ookinete protein 25	-3.247	4.5179e-37	female
PBANKA_1359500	conserved protein, unknown function	-3.24371	1.90436e-21	female	●
PBANKA_0616700	NIMA related kinase 4	-3.22509	7.5073e-38	female	●
PBANKA_1323800	kelch domain-containing protein, putative	-3.21973	1.25888e-51	female
PBANKA_1434400	secreted ookinete protein, putative	-3.21452	2.21878e-39	female	●
PBANKA_1334800	conserved Plasmodium protein, unknown function	-3.19852	1.83837e-82	female	●
PBANKA_1018100	ABC transporter G family member 2, putative	-3.15833	7.02508e-56	female	●
PBANKA_1128800	CPW-WPC family protein	-3.1472	5.94709e-25	female	●
PBANKA_1449300	upregulated in late gametocytes ULG8, putative	-3.14485	2.35375e-58	female	●	●
PBANKA_1418900	ras-related protein Rab-11A	-3.12632	4.31595e-26	female	●
PBANKA_1114100	conserved Plasmodium protein, unknown function	-3.11454	1.49561e-31	female	●
PBANKA_0201700	conserved Plasmodium protein, unknown function	-3.10985	3.53441e-16	female
PBANKA_1334900	conserved Plasmodium protein, unknown function	-3.10954	6.22839e-60	female
PBANKA_0522200	conserved Plasmodium protein, unknown function	-3.10744	3.96668e-46	female
PBANKA_1461300	conserved Plasmodium protein, unknown function	-3.10516	3.93549e-33	female	●	●
PBANKA_0943400	CPW-WPC family protein	-3.09923	6.0873e-38	female	●
PBANKA_0807200	conserved Plasmodium protein, unknown function	-3.07934	7.20934e-46	female
PBANKA_1202000	inner membrane complex protein 1c	-3.0793	7.59072e-36	female	●	●
PBANKA_1218300	CPW-WPC family protein	-3.07714	2.36316e-69	female	●
PBANKA_1318500	conserved Plasmodium protein, unknown function	-3.07137	6.89195e-51	female	●	●
PBANKA_0103200	conserved protein, unknown function	-3.05828	1.00557e-53	female
PBANKA_0916700	conserved Plasmodium protein, unknown function	-3.05781	4.7149e-31	female
PBANKA_0714000	meiotic recombination protein DMC1	-3.04728	8.02332e-26	female	●	●
PBANKA_1219100	inner membrane complex protein 1d	-3.04094	1.61318e-37	female	●
PBANKA_1114200	ribose-5-phosphate isomerase, putative	-3.03576	2.26657e-25	female
PBANKA_1439100	BRO1 domain-containing protein, putative	-3.03517	5.38872e-44	female	●
PBANKA_1353800	conserved Plasmodium protein, unknown function	-3.02701	2.50447e-51	female	●	●
PBANKA_1239000	conserved Plasmodium membrane protein, unknown function	-3.02689	1.99757e-36	female	●	●
PBANKA_1453100	sphingomyelin phosphodiesterase, putative	-3.02414	1.52513e-70	female
PBANKA_1204500	conserved Plasmodium protein, unknown function	-2.99532	9.93743e-23	female
PBANKA_0815700	major facilitator superfamily-related transporter, putative	-2.99213	5.05766e-59	female	●
PBANKA_0827400	conserved Plasmodium protein, unknown function	-2.99204	4.71747e-43	female
PBANKA_0714100	trafficking protein particle complex subunit 2-like protein, putative	-2.98596	3.03581e-16	female
PBANKA_0816800	glycolipid transfer protein, putative	-2.98417	1.24176e-33	female
PBANKA_1460900	tRNA-splicing endonuclease, putative	-2.96614	2.06142e-20	other
PBANKA_1437600	glideosome-associated protein 45, putative	-2.95212	1.08217e-22	female	●
PBANKA_0520100	conserved Plasmodium protein, unknown function	-2.94327	8.81745e-29	female	●
PBANKA_0109800	conserved protein, unknown function	-2.93443	1.90777e-34	female
PBANKA_0523900	glideosome associated protein with multiple membrane spans 2, putative	-2.92595	1.06149e-29	female	●	●
PBANKA_0931500	folate transporter 2, putative	-2.90095	1.15268e-37	female
PBANKA_1131400	metacaspase-1	-2.89753	3.94704e-39	female	●
PBANKA_1414500	protein kinase, putative	-2.89366	5.80483e-27	female	●
PBANKA_1019800	calcium-dependent protein kinase, putative	-2.86874	2.29829e-30	female
PBANKA_1205100	PPPDE peptidase, putative	-2.86335	2.37308e-25	female
PBANKA_1009900	conserved Plasmodium protein, unknown function	-2.84963	2.56576e-23	female
PBANKA_0620400	conserved protein, unknown function	-2.84161	2.96601e-22	female
PBANKA_0605100	Tat binding protein 1(TBP-1)-interacting protein, putative	-2.83521	3.18819e-51	female	●
PBANKA_1403700	AP2 domain transcription factor, putative	-2.83351	3.49165e-25	female
PBANKA_1240100	conserved protein, unknown function	-2.82551	3.87329e-39	female
PBANKA_0620300	conserved protein, unknown function	-2.81956	1.08891e-30	female
PBANKA_0605900	conserved Plasmodium protein, unknown function	-2.81701	1.6271e-49	female	●
PBANKA_0923300	conserved protein, unknown function	-2.81115	4.19737e-19	female
PBANKA_0108300	palmitoyltransferase DHHC2	-2.80882	8.87398e-21	female	●
PBANKA_1027000	serine palmitoyltransferase, putative	-2.8046	1.00584e-23	female	●	●
PBANKA_0714300	small heat shock protein HSP20	-2.79382	1.22839e-18	female
PBANKA_1417400	conserved Plasmodium protein, unknown function	-2.79004	1.89748e-35	female	●
PBANKA_1445000	subpellicular microtubule protein 2, putative	-2.77735	2.36227e-23	female	●
PBANKA_0927600	conserved Plasmodium protein, unknown function	-2.77121	4.87935e-24	female	●
PBANKA_1007900	conserved Plasmodium protein, unknown function	-2.76811	2.21497e-38	female
PBANKA_0608600	zinc finger protein, putative	-2.76747	1.44636e-36	female
PBANKA_0940000	conserved Plasmodium protein, unknown function	-2.76287	1.02024e-26	female	●
PBANKA_1323900	conserved protein, unknown function	-2.76062	2.3689e-42	female
PBANKA_0912400	conserved Plasmodium protein, unknown function	-2.75669	1.26162e-48	female
PBANKA_0932600	conserved protein, unknown function	-2.72373	2.41874e-25	female	●
PBANKA_1005600	conserved Plasmodium protein, unknown function	-2.72106	3.17503e-28	female
PBANKA_1311400	conserved protein, unknown function	-2.72023	5.45278e-19	female
PBANKA_0105100	conserved Plasmodium protein, unknown function	-2.7061	1.05119e-25	female	●
PBANKA_1441000	haloacid dehalogenase-like hydrolase, putative	-2.69511	1.59494e-13	female
PBANKA_0813300	conserved protein, unknown function	-2.68811	3.74651e-45	female
PBANKA_1400900	conserved protein, unknown function	-2.68223	5.62604e-26	other	●
PBANKA_1228900	von Willebrand factor A domain-related protein	-2.68101	1.2388e-21	female
PBANKA_0609600	HSP20-like chaperone, putative	-2.67996	7.09906e-12	female
PBANKA_1205200	transmembrane protein 147, putative	-2.67619	4.74188e-22	female		●
PBANKA_0830400	G2 protein	-2.66173	1.41452e-22	female		●
PBANKA_1415400	conserved protein, unknown function	-2.63294	6.99193e-36	female
PBANKA_1355700	myosin A	-2.63196	3.47918e-27	female
PBANKA_0314800	conserved protein, unknown function	-2.62564	1.37485e-26	female
PBANKA_1445700	conserved Plasmodium protein, unknown function	-2.62517	6.18127e-32	female	●
PBANKA_1218000	nicotinamidase, putative	-2.61995	7.19725e-43	female
PBANKA_0514900	ookinete surface protein P28	-2.61957	7.30628e-21	female	●	●
PBANKA_1444800	thioredoxin-like associated protein 1, putative	-2.60367	3.3652e-49	female	●	●
PBANKA_0907100	inner membrane complex protein 1b	-2.60358	3.20418e-38	female	●
PBANKA_1225500	conserved protein, unknown function	-2.59038	3.29116e-43	female
PBANKA_0823100	S-adenosylmethionine synthetase, putative	-2.59014	2.5908e-26	female
PBANKA_1033600	tRNA-dihydrouridine synthase, putative	-2.5901	1.59338e-34	female	●
PBANKA_1436600	inner membrane complex protein 1h	-2.58444	3.54522e-30	female
PBANKA_0707100	inner membrane complex protein 1i	-2.57816	2.67758e-45	female	●	●
PBANKA_0502000	conserved Plasmodium protein, unknown function	-2.57712	1.66699e-38	female	●
PBANKA_1202600	E3 ubiquitin-protein ligase, putative	-2.57571	6.07068e-36	female
PBANKA_0306900	Sec61-gamma subunit of protein translocation complex, putative	-2.57506	1.54088e-20	female	●	●
PBANKA_0812800	GTP-binding protein, putative	-2.5594	5.39007e-22	other	●
PBANKA_1430600	conserved Plasmodium protein, unknown function	-2.55712	8.481e-28	female	●
PBANKA_1106500	rhomboid protease ROM4	-2.55427	2.0664e-26	female
PBANKA_1242100	methionine aminopeptidase 1a, putative	-2.54994	2.72695e-13	female
PBANKA_0402700	inner membrane complex protein 1e	-2.54284	3.0564e-37	female	●	●
PBANKA_0712200	BEM46-like protein, putative	-2.53493	8.0598e-30	female
PBANKA_1225900	conserved Plasmodium protein, unknown function	-2.53016	8.48256e-19	female
PBANKA_1201800	conserved Plasmodium protein, unknown function	-2.51471	1.24817e-30	female
PBANKA_1354900	inner membrane complex protein 1k, putative	-2.51304	4.2198e-20	female
PBANKA_1451100	conserved Plasmodium protein, unknown function	-2.51084	2.38434e-28	female	●	●
PBANKA_0938200	conserved Plasmodium protein, unknown function	-2.51054	1.11012e-18	female
PBANKA_1102100	conserved Plasmodium protein, unknown function	-2.49908	1.23386e-14	female
PBANKA_1120400	inner membrane complex protein 1j, putative	-2.48798	3.32684e-39	female	●
PBANKA_1423700	GDP-mannose 4,6-dehydratase, putative	-2.47266	7.10543e-21	female
PBANKA_0825900	conserved Plasmodium protein, unknown function	-2.45087	1.70104e-26	female	●	●
PBANKA_0418500	Plasmodium exported protein, unknown function	-2.44376	0.0270699	other
PBANKA_0101800	conserved Plasmodium protein, unknown function	-2.44254	1.69781e-50	female
PBANKA_1410100	conserved Plasmodium protein, unknown function	-2.42327	1.36048e-42	female
PBANKA_0104500	conserved Plasmodium protein, unknown function	-2.41938	7.15897e-36	female	●
PBANKA_0937500	conserved Plasmodium protein, unknown function	-2.40851	3.23971e-42	female
PBANKA_0909500	AAA family ATPase, putative	-2.38524	3.92292e-32	female	●
PBANKA_0306600	conserved Plasmodium protein, unknown function	-2.38119	4.33967e-30	female
PBANKA_1112700	conserved protein, unknown function	-2.37925	6.51503e-19	female	●
PBANKA_1432600	conserved protein, unknown function	-2.37775	2.173e-11	other	●
PBANKA_0803900	conserved Plasmodium protein, unknown function	-2.35981	0.0931972	other
PBANKA_0916650	conserved Plasmodium protein, unknown function	-2.34346	1.25885e-13	female
PBANKA_1008300	GTP-binding protein, putative	-2.33913	1.78075e-27	female
PBANKA_1135800	conserved Plasmodium protein, unknown function	-2.31729	4.2184e-23	other	●
PBANKA_0939500	DNA repair protein RAD51	-2.3124	3.52318e-20	female	●
PBANKA_0932500	histone-lysine N-methyltransferase SET7, putative	-2.31211	5.2072e-36	female
PBANKA_1132300	conserved Plasmodium protein, unknown function	-2.30689	6.31028e-12	female	●
PBANKA_0825700	telomeric repeat binding factor 1, putative	-2.30681	7.25609e-14	female	●	●
PBANKA_0936000	endonuclease/exonuclease/phosphatase family protein, putative	-2.28481	1.0138e-29	female	●
PBANKA_0615500	conserved Plasmodium protein, unknown function	-2.26627	8.3381e-19	female
PBANKA_1312900	conserved Plasmodium protein, unknown function	-2.26069	5.10892e-24	female	●
PBANKA_0310700	conserved protein, unknown function	-2.25177	1.25087e-30	female	●
PBANKA_0835400	conserved Plasmodium protein, unknown function	-2.24938	1.1386e-29	female
PBANKA_1442600	RNA pseudouridylate synthase, putative	-2.24656	4.11798e-32	female
PBANKA_0312000	conserved Plasmodium protein, unknown function	-2.24095	5.72278e-16	female
PBANKA_1034000	conserved Plasmodium protein, unknown function	-2.2393	4.38443e-21	other
PBANKA_1414100	CDP-diacylglycerol--inositol 3-phosphatidyltransferase, putative	-2.22173	3.46205e-19	female
PBANKA_0709600	conserved protein, unknown function	-2.20917	6.448e-14	female
PBANKA_1037800	secreted ookinete adhesive protein	-2.20259	4.69151e-10	female
PBANKA_0302600	3'-5' exonuclease, putative	-2.18491	5.18625e-24	female
PBANKA_0814500	protease, putative	-2.18382	1.60592e-15	female
PBANKA_1432300	cell traversal protein for ookinetes and sporozoites	-2.1656	4.26409e-30	other		●
PBANKA_1116100	conserved protein, unknown function	-2.16559	1.51747e-16	other	●
PBANKA_0612900	conserved Plasmodium protein, unknown function	-2.16284	4.68355e-13	female
PBANKA_0921100	tRNA (guanine-N(7)-)-methyltransferase, putative	-2.16222	4.84232e-23	female	●
PBANKA_1236200	conserved Plasmodium protein, unknown function	-2.16012	4.48899e-13	female	●	●
PBANKA_1143400	NADH-cytochrome b5 reductase, putative	-2.15405	6.50212e-26	female
PBANKA_0615300	conserved Plasmodium protein, unknown function	-2.13373	1.626e-23	female
PBANKA_0718500	repressor of RNA polymerase III transcription MAF1, putative	-2.12831	1.58674e-18	other
PBANKA_0705600	conserved Plasmodium protein, unknown function	-2.12374	2.259e-20	female
PBANKA_0102100	dihydroorotate dehydrogenase, putative	-2.11888	1.17959e-14	female
PBANKA_1115000	conserved protein, unknown function	-2.11823	1.21308e-24	female	●
PBANKA_0709000	protein transport protein SEC61 subunit beta, putative	-2.11749	2.31453e-10	other
PBANKA_1101200	Plasmodium exported protein, unknown function	-2.10888	1.11016e-18	female
PBANKA_1109900	stripes inner membrane complex protein, putative	-2.10388	8.445e-15	female
PBANKA_0620700	conserved Plasmodium protein, unknown function	-2.10361	1.48314e-20	other	●
PBANKA_1326600	mediator of RNA polymerase II transcription subunit 20, putative	-2.09797	3.0865e-27	female	●
PBANKA_1407900	HORMA domain protein, putative	-2.09589	7.46309e-26	female
PBANKA_1138200	RuvB-like helicase 3, putative	-2.09342	5.73243e-20	female
PBANKA_1429200	kelch domain-containing protein, putative	-2.09296	2.3259e-26	female		●
PBANKA_0938000	conserved Plasmodium protein, unknown function	-2.0893	4.07037e-21	female	●
PBANKA_0905900	AP2 domain transcription factor AP2-O	-2.08155	7.72853e-17	female
PBANKA_1009600	conserved protein, unknown function	-2.0738	3.87184e-28	female
PBANKA_0915400	conserved Plasmodium protein, unknown function	-2.06478	8.45288e-06	female	●
PBANKA_1456300	mitochondrial import inner membrane translocase subunit TIM13, putative	-2.05977	4.55936e-16	other
PBANKA_1316100	conserved Plasmodium protein, unknown function	-2.04909	9.58211e-27	female
PBANKA_1417200	conserved protein, unknown function	-2.04653	2.86878e-42	female
PBANKA_1323300	pyridoxal 5'-phosphate synthase, putative	-2.04029	1.59494e-13	female
PBANKA_1434600	formin 2, putative	-2.03884	7.41888e-16	female
PBANKA_0214800	heat shock protein, putative	-2.0316	2.10154e-16	other
PBANKA_1143800	conserved Plasmodium protein, unknown function	-2.02736	9.38252e-22	female	●
PBANKA_1020300	ankyrin-repeat protein, putative	-2.02392	8.364e-26	female
PBANKA_1210200	PRE-binding protein, putative	-2.02305	3.34633e-27	female
PBANKA_0101500	conserved Plasmodium protein, unknown function	-2.02056	1.25347e-19	female
PBANKA_0403200	circumsporozoite (CS) protein	-2.01645	0.108698	other		●
PBANKA_1011600	chromatin assembly factor 1 P55 subunit, putative	-2.01588	3.19622e-13	female
PBANKA_1120200	pyridoxine biosynthesis protein PDX1, putative	-2.01251	3.26137e-09	other
PBANKA_0505800	deoxyribose-phosphate aldolase, putative	-2.01175	9.20554e-21	other	●
PBANKA_0305900	conserved Plasmodium protein, unknown function	-2.01039	8.68836e-13	other
PBANKA_1207800	metalloprotease, putative	-2.00929	4.538e-13	other	●
PBANKA_0109900	basal complex transmembrane protein 1, putative	-2.00536	2.39245e-29	female
PBANKA_1346900	conserved protein, unknown function	-1.99873	2.62773e-16	female	●	●
PBANKA_1129800	tetratricopeptide repeat protein, putative	-1.99812	7.22912e-17	female
PBANKA_1124700	conserved Plasmodium protein, unknown function	-1.99506	6.90467e-14	female
PBANKA_0940300	DEAD/DEAH box helicase, putative	-1.99401	1.19979e-25	female
PBANKA_0307600	syntaxin, putative	-1.98484	5.14606e-13	female
PBANKA_0901700	conserved Plasmodium protein, unknown function	-1.98303	2.21371e-10	other	●
PBANKA_0902700	conserved Plasmodium protein, unknown function	-1.97492	8.13273e-08	other
PBANKA_1106800	subtilisin-like protease 3, putative	-1.97403	1.28119e-21	female	●
PBANKA_1342500	conserved Plasmodium protein, unknown function	-1.97244	8.485e-26	female
PBANKA_1223200	coenzyme Q-binding protein COQ10 homolog, mitochondrial, putative	-1.95949	6.43535e-11	female	●
PBANKA_1318800	protein tyrosine phosphatase	-1.94592	5.13859e-11	other	●	●
PBANKA_0307800	conserved Plasmodium protein, unknown function	-1.94295	1.50675e-27	other
PBANKA_1314900	conserved Plasmodium protein, unknown function	-1.94228	1.76179e-19	female
PBANKA_1455000	mitochondrial carrier protein, putative	-1.93978	4.49894e-10	female
PBANKA_1214400	conserved Plasmodium protein, unknown function	-1.93462	1.50018e-20	female
PBANKA_1025900	lysine--tRNA ligase, putative	-1.93191	1.463e-24	other	●
PBANKA_0821400	ADP-ribosylation factor, putative	-1.92364	1.49439e-10	female
PBANKA_0502500	serine/threonine protein phosphatase 8	-1.90974	3.71078e-11	female	●
PBANKA_1113400	secreted ookinete protein	-1.90403	1.40216e-29	female	●	●
PBANKA_1232300	UTP--glucose-1-phosphate uridylyltransferase, putative	-1.90217	1.20925e-17	female	●
PBANKA_1241100	WD repeat-containing protein 55, putative	-1.88838	7.30677e-16	female
PBANKA_0312700	DEAD/DEAH box helicase, putative	-1.88383	8.9521e-12	female		●
PBANKA_0204500	LCCL domain-containing protein, putative	-1.87979	6.79321e-10	female	●
PBANKA_1463900	HSP20-like chaperone, putative	-1.87923	1.37395e-20	female	●
PBANKA_0620600	protein CPH1, putative	-1.87195	4.84416e-19	other	●
PBANKA_0310300	protein kinase 7	-1.87162	1.09579e-15	female
PBANKA_1125900	ankyrin-repeat protein, putative	-1.86911	3.75831e-27	other
PBANKA_1127500	glutamyl-tRNA(Gln) amidotransferase subunit B, putative	-1.86493	9.65574e-15	other	●
PBANKA_1444300	conserved protein, unknown function	-1.86485	2.41463e-16	other	●
PBANKA_1136000	ADP-ribosylation factor, putative	-1.86442	1.24418e-06	other
PBANKA_1336200	conserved Plasmodium protein, unknown function	-1.86215	1.08992e-12	female		●
PBANKA_1435200	zinc finger protein, putative	-1.86183	9.855e-24	female	●
PBANKA_1320800	conserved Plasmodium protein, unknown function	-1.85945	1.3092e-22	female		●
PBANKA_0302000	conserved Plasmodium protein, unknown function	-1.85183	5.72278e-16	other	●
PBANKA_0503500	zinc finger protein, putative	-1.8442	3.15976e-07	female	●	●
PBANKA_0514800	calmodulin, putative	-1.84132	3.34693e-10	female
PBANKA_1357700	aspartate carbamoyltransferase, putative	-1.83883	2.17805e-10	female
PBANKA_0303500	PH domain-containing protein, putative	-1.83553	1.74731e-10	female
PBANKA_1028200	atypical protein kinase, ABC-1 family, putative	-1.83366	4.9368e-10	female
PBANKA_0623150	conserved rodent malaria protein, unknown function	-1.83326	1.81427e-09	female
PBANKA_1237800	multidrug resistance protein 1, putative	-1.83213	8.75842e-23	other
PBANKA_0608500	SNARE protein, putative	-1.82901	2.05083e-16	other	●
PBANKA_0907900	conserved Plasmodium protein, unknown function	-1.8284	8.47017e-11	female
PBANKA_0407000	conserved protein, unknown function	-1.82726	1.30711e-09	other
PBANKA_0904300	apicoplast import protein Tic20, putative	-1.82685	4.29554e-09	female
PBANKA_0926800	conserved protein, unknown function	-1.82641	6.45017e-10	other	●
PBANKA_1229800	enoyl-acyl carrier reductase	-1.81197	8.10678e-19	female	●
PBANKA_0713200	conserved protein, unknown function	-1.80452	3.52591e-28	female	●
PBANKA_0824400	cyclin-dependent kinases regulatory subunit, putative	-1.80343	1.44318e-20	other
PBANKA_1140900	ribosomal protein S17, putative	-1.79475	8.14035e-10	other
PBANKA_1446200	mitosis protein dim1, putative	-1.79417	5.38364e-08	female
PBANKA_1112800	conserved protein, unknown function	-1.78981	9.81385e-10	female
PBANKA_0523600	BSD-domain protein, putative	-1.78765	5.33329e-11	female	●
PBANKA_0609500	kinesin-7, putative	-1.76894	8.35607e-21	female	●	●
PBANKA_1420800	conserved Plasmodium protein, unknown function	-1.75382	4.78162e-16	female
PBANKA_1325500	conserved Plasmodium protein, unknown function	-1.75306	3.63832e-10	female	●
PBANKA_1245900	Plasmodium exported protein, unknown function	-1.75234	2.05502e-11	other
PBANKA_1313200	AP2 domain transcription factor AP2-O5, putative	-1.74782	4.07345e-14	female
PBANKA_0409500	conserved protein, unknown function	-1.74434	1.6401e-18	other	●
PBANKA_1410950	apical ring associated protein 1	-1.74046	0.00091927	female	●
PBANKA_0821100	CS domain protein, putative	-1.71832	5.06916e-19	other	●
PBANKA_1422000	conserved protein, unknown function	-1.71452	2.02767e-08	other
PBANKA_0835500	UBX domain-containing protein, putative	-1.71216	8.17427e-29	female
PBANKA_1107900	triose phosphate transporter	-1.70958	1.47788e-11	other
PBANKA_1123100	conserved Plasmodium protein, unknown function	-1.7026	1.36101e-12	female	●
PBANKA_1020000	conserved Plasmodium protein, unknown function	-1.69875	5.50787e-16	female	●
PBANKA_0209300	actin-related protein	-1.69018	2.2707e-10	female	●	●
PBANKA_1364400	inner membrane complex protein 1f, putative	-1.68843	7.88604e-21	female
PBANKA_1333700	cGMP-specific 3',5'-cyclic phosphodiesterase delta	-1.68825	7.0558e-11	female	●
PBANKA_1232600	apicortin, putative	-1.68671	4.29882e-12	female
PBANKA_0510300	conserved Plasmodium protein, unknown function	-1.68564	1.0395e-11	female
PBANKA_0201900	conserved protein, unknown function	-1.68314	2.12792e-15	other
PBANKA_1305200	serine/threonine protein kinase, putative	-1.67967	4.22642e-16	female
PBANKA_1240600	inner membrane complex protein 1g, putative	-1.67963	7.27228e-08	female
PBANKA_1351400	conserved Plasmodium protein, unknown function	-1.67639	2.0926e-20	other	●
PBANKA_1314300	S-adenosylmethionine-dependent methyltransferase, putative	-1.67582	1.13497e-25	female
PBANKA_1346400	conserved Plasmodium protein, unknown function	-1.67195	6.00057e-21	female
PBANKA_1015700	protein archease, putative	-1.66837	3.41602e-07	other
PBANKA_0110500	leucine-rich repeat protein	-1.66302	2.73473e-11	female
PBANKA_1128100	phospholipase	-1.66063	1.86691e-11	female
PBANKA_0702700	rhomboid protease ROM3	-1.65568	3.12416e-08	female	●
PBANKA_1207400	conserved Plasmodium protein, unknown function	-1.6497	6.2706e-10	other	●
PBANKA_1459500	myosin A tail domain interacting protein MTIP, putative	-1.64838	5.7204e-09	female		●
PBANKA_1360200	conserved Plasmodium protein, unknown function	-1.64478	2.16394e-06	female
PBANKA_1202700	RNA-binding protein, putative	-1.64464	8.17181e-19	female
PBANKA_1303900	conserved Plasmodium protein, unknown function	-1.64416	4.01254e-08	female	●
PBANKA_0815100	conserved Plasmodium protein, unknown function	-1.64136	2.82891e-10	female
PBANKA_0719100	conserved Plasmodium protein, unknown function	-1.63831	4.55504e-10	female	●
PBANKA_0214000	dynein heavy chain, putative	-1.63434	7.49026e-08	female	●
PBANKA_0616600	ATP synthase F0 subunit a-like protein, putative	-1.63405	2.59678e-09	other	●
PBANKA_0405700	ATP-dependent Clp protease proteolytic subunit, putative	-1.62103	3.9935e-09	female
PBANKA_0601800	DNA/RNA-binding protein, putative	-1.61873	1.63549e-09	other
PBANKA_1345500	CTLH domain-containing protein, putative	-1.60569	7.24858e-25	other	●
PBANKA_1026300	conserved protein, unknown function	-1.59494	7.48742e-14	other	●
PBANKA_0828500	serine/threonine protein phosphatase 4	-1.59387	2.65751e-13	female
PBANKA_0823300	para-aminobenzoic acid synthetase, putative	-1.58961	2.58634e-08	other
PBANKA_1009200	conserved Plasmodium protein, unknown function	-1.58827	1.68158e-11	female
PBANKA_1461700	conserved Plasmodium protein, unknown function	-1.58692	1.14887e-06	female
PBANKA_1245150	dolichol-phosphate mannosyltransferase subunit 3, putative	-1.5843	1.13085e-09	female	●
PBANKA_0716200	calmodulin-like protein, putative	-1.5839	4.65408e-07	female
PBANKA_0110700	conserved Plasmodium protein, unknown function	-1.58171	3.83553e-05	female
PBANKA_0519500	conserved Plasmodium protein, unknown function	-1.57857	0.105944	other
PBANKA_1034700	multifunctional methyltransferase subunit TRM112, putative	-1.57047	1.07173e-08	other	●
PBANKA_1359000	protein transport protein SEC61 subunit alpha, putative	-1.5696	2.1275e-11	other		●
PBANKA_0503300	conserved Plasmodium protein, unknown function	-1.56929	6.01219e-11	female
PBANKA_1453300	acyl-CoA synthetase, putative	-1.55234	6.448e-14	female	●
PBANKA_1016000	heme/steroid binding domain containing protein, putative	-1.55122	5.15147e-09	other
PBANKA_0821900	ubiquitin-conjugating enzyme E2, putative	-1.54126	6.96013e-07	other	●
PBANKA_1133100	serine/threonine protein kinase, putative	-1.54015	1.22786e-05	female
PBANKA_1126800	HECT-domain (ubiquitin-transferase), putative	-1.53497	0.000421621	female	●	●
PBANKA_1339600	PRELI domain-containing protein, putative	-1.52905	1.32101e-10	female
PBANKA_0819700	dihydrouridine synthase, putative	-1.52576	2.4109e-08	other	●
PBANKA_0408200	calcium-dependent protein kinase 3	-1.51702	2.45034e-06	female
PBANKA_0110900	cytoplasmic tRNA 2-thiolation protein 1, putative	-1.51064	1.26182e-09	female
PBANKA_1340200	U6 snRNA-associated Sm-like protein LSm6, putative	-1.50253	1.53207e-08	other
PBANKA_0611600	ribonucleoside-diphosphate reductase large subunit, putative	-1.50244	9.57173e-18	other
PBANKA_0904200	conserved Plasmodium protein, unknown function	-1.49968	8.6642e-17	female
PBANKA_1328800	conserved protein, unknown function	-1.49199	1.38725e-06	other	●
PBANKA_1201300	conserved Plasmodium protein, unknown function	-1.49097	4.30644e-08	other
PBANKA_1026800	zinc finger protein, putative	-1.48936	5.03486e-08	other
PBANKA_1338700	plasmepsin V, putative	-1.48513	2.51027e-17	female
PBANKA_0801800	conserved Plasmodium protein, unknown function	-1.47866	7.63722e-06	female
PBANKA_0914600	RNA (uracil-5-)methyltransferase, putative	-1.47564	1.39548e-10	female	●
PBANKA_1113500	ras-related protein Rab-1A, putative	-1.47417	3.1834e-08	other	●
PBANKA_0413500	conserved Plasmodium protein, unknown function	-1.46944	3.24423e-12	female	●	●
PBANKA_1141400	DNA topoisomerase 6 subunit B, putative	-1.46929	6.49445e-16	other	●
PBANKA_0506600	serine/arginine-rich splicing factor 4, putative	-1.46871	7.94276e-17	other
PBANKA_0301700	5'-3' exonuclease, putative	-1.46869	4.13121e-14	female	●
PBANKA_1014800	ADP-dependent DNA helicase RecQ, putative	-1.46325	2.38758e-10	other
PBANKA_0927300	palmitoyltransferase DHHC3	-1.46018	8.11746e-06	female
PBANKA_0819600	conserved Plasmodium protein, unknown function	-1.43997	0.000575328	other
PBANKA_0102900	AP2 domain transcription factor, putative	-1.43261	9.31215e-07	female	●
PBANKA_1312600	conserved protein, unknown function	-1.42005	9.56798e-07	other
PBANKA_0939000	mechanosensitive ion channel protein, putative	-1.41895	3.12416e-08	other
PBANKA_0701900	GPI-anchored micronemal antigen, putative	-1.41571	0.153342	other
PBANKA_0608000	porphobilinogen deaminase	-1.41557	4.40956e-07	female
PBANKA_1413000	transmembrane emp24 domain-containing protein, putative	-1.41553	6.58243e-07	other
PBANKA_1330100	60S ribosome subunit biogenesis protein NIP7, putative	-1.41545	6.51664e-07	other
PBANKA_0602500	threonylcarbamoyl-AMP synthase, putative	-1.40577	4.79876e-11	other	●
PBANKA_0929200	conserved protein, unknown function	-1.40467	3.22161e-09	other	●
PBANKA_1342400	ribonuclease P protein subunit RPR2, putative	-1.3932	4.84647e-13	other	●
PBANKA_1310700	glutaminyl-peptide cyclotransferase, putative	-1.37968	1.30138e-08	other		●
PBANKA_1361200	conserved Plasmodium protein, unknown function	-1.37893	7.68013e-07	female
PBANKA_1038400	selenoprotein, putative	-1.37579	2.62034e-06	other
PBANKA_0602800	ubiquitin-conjugating enzyme E2, putative	-1.37403	4.86264e-07	other	●
PBANKA_0204400	cleavage and polyadenylation specificity factor subunit 5, putative	-1.3691	5.51916e-09	female
PBANKA_1113200	mitochondrial import inner membrane translocase subunit TIM16, putative	-1.36059	1.48334e-08	other
PBANKA_0111700	50S ribosomal protein L18, apicoplast, putative	-1.35927	1.3916e-05	other
PBANKA_0812200	conserved protein, unknown function	-1.35708	1.19532e-12	female
PBANKA_1450800	conserved Plasmodium protein, unknown function	-1.35631	4.55906e-12	female	●
PBANKA_0923600	GrpE protein homolog, mitochondrial, putative	-1.3518	4.95148e-05	other
PBANKA_0512500	nucleolar preribosomal assembly protein, putative	-1.35058	5.48877e-10	female
PBANKA_0511700	meiotic recombination protein SPO11-2, putative	-1.3503	3.06373e-06	female	●
PBANKA_1107000	conserved Plasmodium protein, unknown function	-1.35029	2.03243e-06	other	●
PBANKA_0915000	apical membrane antigen 1	-1.34906	0.287919	other
PBANKA_0828100	fumarate hydratase, putative	-1.34278	2.74683e-09	other	●
PBANKA_0407200	dual specificity protein phosphatase	-1.33205	5.2038e-12	female
PBANKA_0315800	ribosome associated membrane protein RAMP4, putative	-1.32349	8.36894e-06	female		●
PBANKA_1035200	LCCL domain-containing protein	-1.32084	4.99151e-06	female	●
PBANKA_0213500	ribosome biogenesis protein BRX1, putative	-1.31975	2.86073e-11	other
PBANKA_1107800	longevity-assurance (LAG1) protein, putative	-1.31882	1.1713e-07	female
PBANKA_1032400	alpha/beta hydrolase, putative	-1.31802	9.74235e-08	other	●
PBANKA_1313100	crossover junction endonuclease MUS81, putative	-1.31682	9.09331e-10	female
PBANKA_1143700	secreted ookinete protein, putative	-1.31536	1.489e-16	female
PBANKA_1119600	merozoite surface protein 10, putative	-1.31267	0.0233629	other
PBANKA_1135400	riboflavin kinase, putative	-1.30902	1.96997e-08	other	●
PBANKA_0603650	conserved Plasmodium protein, unknown function	-1.3082	0.000178507	other
PBANKA_0315500	saccharopine dehydrogenase, putative	-1.30732	2.93807e-06	other
PBANKA_0704000	SNARE protein, putative	-1.30592	8.90873e-10	other	●
PBANKA_1340600	conserved Plasmodium protein, unknown function	-1.30589	6.88555e-11	female
PBANKA_1305500	acid cluster protein 33 homologue, putative	-1.30495	1.86078e-08	female
PBANKA_0919900	ATP-dependent 6-phosphofructokinase, putative	-1.30397	3.83585e-08	female
PBANKA_1241400	conserved Plasmodium protein, unknown function	-1.30392	0.000652129	female
PBANKA_1364700	GTP-binding protein, putative	-1.30255	1.06291e-15	female
PBANKA_1400800	protein UIS3	-1.30176	0.0189638	other
PBANKA_1238500	conserved Plasmodium protein, unknown function	-1.29996	7.13679e-17	other
PBANKA_1143900	conserved protein, unknown function	-1.29366	1.55023e-05	female
PBANKA_1364300	glycerol kinase, putative	-1.29333	2.49476e-10	female	●	●
PBANKA_1419100	dihydrolipoyllysine-residue succinyltransferase component of 2-oxoglutarate dehydrogenase complex, putative	-1.29247	2.26023e-13	other	●
PBANKA_1117100	histone H3 variant, putative	-1.29143	0.000239959	other	●	●
PBANKA_0617800	conserved Plasmodium protein, unknown function	-1.28362	7.76202e-06	female
PBANKA_1023200	splicing factor 3B subunit 4, putative	-1.28192	0.00117694	other
PBANKA_1114600	pre-mRNA-splicing factor CWC2, putative	-1.27778	9.98622e-09	other
PBANKA_1022300	mannose-1-phosphate guanyltransferase, putative	-1.27432	3.48589e-08	other	●
PBANKA_1204100	conserved protein, unknown function	-1.27079	1.22422e-13	other
PBANKA_1355900	phosphoenolpyruvate carboxykinase, putative	-1.26829	2.71537e-08	female
PBANKA_1009800	cytochrome c oxidase assembly protein COX15, putative	-1.26674	8.33903e-08	other
PBANKA_1200800	transformer-2 protein homolog beta, putative	-1.26325	3.01514e-07	other
PBANKA_0721800	apical merozoite protein, putative	-1.25999	1.82573e-11	female
PBANKA_0917200	RNA-binding protein s1, putative	-1.25826	2.37495e-08	other
PBANKA_1429500	DNA-directed RNA polymerases I, II, and III subunit RPABC3, putative	-1.25685	0.00071501	other
PBANKA_1361300	TBC domain protein, putative	-1.25051	3.83585e-08	other
PBANKA_0108700	RNA-binding protein 25, putative	-1.24796	2.17874e-10	other
PBANKA_1237600	zinc finger protein, putative	-1.24774	2.16495e-05	female	●
PBANKA_1205300	roadblock/LC7 domain-containing protein, putative	-1.24704	0.00015009	male
PBANKA_1300900	cytochrome c oxidase assembly protein COX11, putative	-1.24668	0.00108204	female
PBANKA_1330700	50S ribosomal protein L22, apicoplast, putative	-1.24475	1.64352e-08	other
PBANKA_1356100	conserved Plasmodium protein, unknown function	-1.2402	4.97529e-18	other	●
PBANKA_1006300	perforin-like protein 1	-1.23996	0.00296898	other
PBANKA_1356500	conserved protein, unknown function	-1.23764	3.58627e-05	other
PBANKA_0929300	actin-related protein 2/3 complex subunit 1, putative	-1.23183	4.66016e-06	other	●
PBANKA_0106300	conserved Plasmodium protein, unknown function	-1.23002	0.000225589	female
PBANKA_0718200	conserved protein, unknown function	-1.22652	0.0179716	other
PBANKA_1220900	conserved protein, unknown function	-1.22626	9.47546e-06	male
PBANKA_0931600	guanine nucleotide-exchange factor SEC12, putative	-1.22247	1.13405e-07	other
PBANKA_1207100	Plasmodium exported protein, unknown function	-1.21928	6.42613e-08	other
PBANKA_0926500	peptidase M16, putative	-1.21821	0.000330471	female
PBANKA_1428600	SND2 domain-containing protein, putative	-1.21464	7.72534e-06	other
PBANKA_0410000	conserved protein, unknown function	-1.21095	3.64524e-05	other
PBANKA_1002600	6-cysteine protein P41, putative	-1.20858	0.225915	other
PBANKA_1017300	conserved Plasmodium protein, unknown function	-1.20715	4.09413e-06	other
PBANKA_1302800	thioredoxin peroxidase 1	-1.20616	2.35068e-11	other
PBANKA_1206000	conserved Plasmodium protein, unknown function	-1.205	2.50313e-06	other		●
PBANKA_1345900	protein kinase, putative	-1.20405	1.49404e-05	other
PBANKA_0612700	conserved Plasmodium protein, unknown function	-1.20322	4.56733e-09	other	●
PBANKA_0107700	zinc transporter ZIP1	-1.20242	2.45034e-06	other
PBANKA_0501200	early transcribed membrane protein	-1.20051	0.00760447	other
PBANKA_1037700	ribosomal protein L16, mitochondrial, putative	-1.19809	5.84316e-07	other
PBANKA_1029300	30S ribosomal protein S9, putative	-1.19577	1.63006e-06	other
PBANKA_1204200	IMP1-like protein, putative	-1.19339	0.00123924	other	●	●
PBANKA_1136300	RNA-binding protein, putative	-1.1929	0.000439968	other
PBANKA_0921200	conserved Plasmodium protein, unknown function	-1.19286	0.0228379	other
PBANKA_1359400	conserved Plasmodium protein, unknown function	-1.19252	1.51653e-10	other
PBANKA_1003900	gametocyte-specific protein	-1.19172	0.0659583	other
PBANKA_1411700	peptidyl-prolyl cis-trans isomerase, putative	-1.18689	0.000244448	other
PBANKA_1108500	conserved Plasmodium protein, unknown function	-1.16964	0.00020875	female		●
PBANKA_1242400	conserved Plasmodium protein, unknown function	-1.16795	5.32612e-09	female
PBANKA_1423000	conserved protein, unknown function	-1.16687	0.0151324	other
PBANKA_1347800	20 kDa chaperonin, putative	-1.16508	0.000119267	other
PBANKA_0918500	conserved Plasmodium protein, unknown function	-1.16055	3.72756e-05	other
PBANKA_0932100	palmitoyltransferase DHHC9	-1.1599	5.81266e-05	other
PBANKA_1430700	conserved protein, unknown function	-1.15835	6.48602e-05	other	●
PBANKA_1210900	phosphoglucomutase, putative	-1.15024	2.08559e-11	other	●
PBANKA_1228800	protein kinase, putative	-1.14891	0.311968	other
PBANKA_0909100	ER membrane protein complex subunit 8, putative	-1.14286	7.5613e-08	other	●
PBANKA_1436500	conserved Plasmodium protein, unknown function	-1.14138	1.53773e-17	female
PBANKA_0107800	citrate synthase-like protein, putative	-1.13497	6.53279e-06	other	●
PBANKA_0622900	conserved Plasmodium protein, unknown function	-1.12996	0.35262	other
PBANKA_1439300	WD repeat-containing protein, putative	-1.12824	4.31153e-07	female
PBANKA_0825200	thiamine pyrophosphokinase, putative	-1.1192	3.97707e-10	other
PBANKA_1237000	18S rRNA (guanine-N(7))-methyltransferase, putative	-1.11635	1.81419e-06	other
PBANKA_1453400	protein kinase 2	-1.11332	1.75724e-05	female
PBANKA_0412900	circumsporozoite- and TRAP-related protein	-1.11016	1.07522e-07	female
PBANKA_0916900	conserved Plasmodium protein, unknown function	-1.10434	6.55144e-08	other	●
PBANKA_0524500	conserved rodent malaria protein, unknown function	-1.10419	0.162553	other
PBANKA_0105800	RING zinc finger protein, putative	-1.10319	8.2524e-06	other
PBANKA_1427400	apicoplast ribosomal protein L33 precursor, putative	-1.10167	0.000185012	other	●
PBANKA_0903800	serine/threonine protein kinase, putative	-1.10025	2.90595e-05	female
PBANKA_1217700	ATP-dependent RNA helicase DDX6	-1.09636	8.33473e-10	other	●
PBANKA_0924600	mitochondrial ribosomal protein L37, putative	-1.09462	0.000134302	other
PBANKA_0505700	ATP-dependent RNA helicase ROK1, putative	-1.09431	2.92088e-08	other	●
PBANKA_1202800	conserved Plasmodium protein, unknown function	-1.09066	3.438e-08	other
PBANKA_1021200	conserved Plasmodium protein, unknown function	-1.08877	5.49167e-09	female	●
PBANKA_0904900	mitochondrial large subunit ribosomal protein, putative	-1.08265	1.63678e-05	other
PBANKA_0403100	1-cys-glutaredoxin-like protein-1, putative	-1.08091	5.20649e-06	other
PBANKA_1245500	conserved Plasmodium protein, unknown function	-1.08075	0.000562334	female	●
PBANKA_0814800	conserved Plasmodium protein, unknown function	-1.07917	0.0640518	other		●
PBANKA_0505200	conserved protein, unknown function	-1.07739	5.67633e-06	other
PBANKA_1014500	plasmepsin IX, putative	-1.07721	0.000563134	female
PBANKA_1419200	RNA-binding protein, putative	-1.07561	6.93423e-05	other	●
PBANKA_1430400	adrenodoxin-type ferredoxin, putative	-1.07134	0.000129444	other
PBANKA_1024400	calmodulin, putative	-1.07117	0.00219566	female
PBANKA_1317800	tRNA intron endonuclease, putative	-1.071	0.00048853	other
PBANKA_1209400	inner membrane complex sub-compartment protein 1	-1.06918	2.32612e-06	other	●	●
PBANKA_1337900	conserved Plasmodium protein, unknown function	-1.06778	0.00484186	female	●
PBANKA_0523800	apical asparagine-rich protein AARP, putative	-1.06749	0.310097	other
PBANKA_1137700	cytochrome c oxidase subunit 2, putative	-1.06737	2.23985e-05	female
PBANKA_0904000	conserved Plasmodium protein, unknown function	-1.06513	0.00195492	female
PBANKA_1213300	conserved Plasmodium protein, unknown function	-1.06151	0.00011338	female
PBANKA_0828800	cytochrome c oxidase subunit 6B, putative	-1.06144	0.000161563	female
PBANKA_0501800	myosin essential light chain ELC, putative	-1.05846	0.301847	other
PBANKA_1310500	conserved Plasmodium protein, unknown function	-1.05362	0.000128648	other
PBANKA_1221900	conserved Plasmodium protein, unknown function	-1.05302	3.438e-08	other
PBANKA_1021100	DnaJ protein, putative	-1.05164	1.27965e-05	female
PBANKA_1113300	deoxyribodipyrimidine photo-lyase, putative	-1.04578	5.33784e-11	other
PBANKA_0604600	conserved protein, unknown function	-1.04483	3.27433e-12	other
PBANKA_1208000	tubulin--tyrosine ligase, putative	-1.04395	4.50562e-06	female	●
PBANKA_0204600	photosensitized INA-labeled protein PHIL1	-1.04095	0.00849191	other
PBANKA_0311400	serine/threonine protein kinase, putative	-1.03564	6.04993e-09	female
PBANKA_0619400	V-type ATPase V0 subunit e, putative	-1.03546	0.00181372	other
PBANKA_0616400	conserved protein, unknown function	-1.03395	0.00803469	female
PBANKA_1008900	conserved Plasmodium protein, unknown function	-1.03202	3.93546e-07	other
PBANKA_1037400	conserved Plasmodium protein, unknown function	-1.03112	0.0386528	other
PBANKA_0417000	signal peptidase complex subunit 3, putative	-1.02623	4.07954e-06	other
PBANKA_0306400	2C-methyl-D-erythritol 2,4-cyclodiphosphate synthase, putative	-1.02589	8.2524e-06	other
PBANKA_1414900	SAS6-like protein	-1.02398	1.18699e-05	female	●
PBANKA_1461000	methyltransferase, putative	-1.02273	2.36889e-07	other
PBANKA_0833100	M18 aspartyl aminopeptidase, putative	-1.01609	2.57041e-09	other	●
PBANKA_0508800	RAP protein, putative	-1.01234	0.0013999	other		●
PBANKA_0908600	conserved Plasmodium protein, unknown function	-1.00977	0.0158511	other
PBANKA_1427300	ABC1 family, putative	-1.009	3.47403e-07	other	●
PBANKA_1006200	sporozoite invasion-associated protein 1	-1.00571	0.00048853	male
PBANKA_1015000	mitochondrial ribosomal protein L15 precursor, putative	-1.00537	6.52631e-06	other	●
PBANKA_0822700	ribosome production factor 1, putative	-1.005	3.18376e-06	other	●
PBANKA_0709500	ATP-dependent RNA helicase DHX36, putative	-1.00304	6.2039e-08	other
PBANKA_0903000	ribosome assembly protein 4, putative	-1.002	1.16258e-07	other
PBANKA_0516000	conserved Plasmodium protein, unknown function	-0.999637	0.000570686	female		●
PBANKA_0622400	kinesin-19, putative	-0.999246	0.000207572	female
PBANKA_0611300	conserved Plasmodium protein, unknown function	-0.995398	1.6012e-06	female
PBANKA_1013700	mitochondrial ribosomal protein L17-2 precursor, putative	-0.994902	0.00315674	other
PBANKA_1131500	conserved Plasmodium protein, unknown function	-0.991117	3.9526e-06	female	●
PBANKA_0623000	Plasmodium exported protein, unknown function	-0.984398	0.0919052	other
PBANKA_0512900	conserved protein, unknown function	-0.97986	0.0065287	other
PBANKA_1002400	dipeptidyl aminopeptidase 3, putative	-0.979509	0.379779	other
PBANKA_1351500	calcium-dependent protein kinase 5	-0.975513	0.0199548	other
PBANKA_1355500	casein kinase II beta chain, putative	-0.975063	4.25115e-07	other	●
PBANKA_1312200	ubiquitin-protein ligase, putative	-0.974923	4.01861e-08	other
PBANKA_1424500	conserved Plasmodium protein, unknown function	-0.974719	2.13451e-08	female
PBANKA_0917100	serpentine receptor, putative	-0.973635	1.38725e-06	other
PBANKA_1228300	lysine-specific histone demethylase, putative	-0.970232	0.00519715	female	●
PBANKA_1102000	protein Mpv17, putative	-0.969657	4.62721e-05	other
PBANKA_0213000	RNA-binding protein, putative	-0.968804	0.00361168	other
PBANKA_0716600	acylated pleckstrin-homology domain-containing protein, putative	-0.968782	9.93222e-05	other	●
PBANKA_1462000	conserved protein, unknown function	-0.968755	0.0010646	other
PBANKA_1111700	conserved protein, unknown function	-0.962642	0.00187939	other
PBANKA_1364900	U3 small nucleolar RNA-associated protein 15, putative	-0.961515	0.000571756	other
PBANKA_1234000	V-type proton ATPase 16 kDa proteolipid subunit, putative	-0.959452	0.0167857	other	●
PBANKA_1349800	thrombospondin-related anonymous protein	-0.958334	0.0612369	other
PBANKA_1210800	hypoxanthine-guanine phosphoribosyltransferase, putative	-0.957422	0.0935507	other
PBANKA_0509500	conserved protein, unknown function	-0.955533	0.00044396	other
PBANKA_0822800	conserved Plasmodium protein, unknown function	-0.954847	0.00731113	other	●
PBANKA_0213300	1-cys peroxiredoxin, putative	-0.953403	0.0105871	other
PBANKA_0314100	conserved protein, unknown function	-0.951206	0.000717496	other
PBANKA_0607500	mago-binding protein, putative	-0.950565	0.00011126	other
PBANKA_0208900	StAR-related lipid transfer protein, putative	-0.94943	0.130255	other
PBANKA_0813700	conserved Plasmodium protein, unknown function	-0.948819	0.0339682	other	●
PBANKA_1002900	ag-1 blood stage membrane protein homologue	-0.940828	0.144853	other
PBANKA_0620200	conserved protein, unknown function	-0.940313	1.12807e-06	other
PBANKA_0415700	autophagy-related protein 3, putative	-0.940243	0.000446183	other
PBANKA_1121600	conserved Plasmodium protein, unknown function	-0.937571	8.72514e-07	other
PBANKA_0939100	AP2 domain transcription factor, putative	-0.932917	2.95335e-05	female	●
PBANKA_1101400	rhoptry-associated protein 2/3	-0.928105	0.0288698	other
PBANKA_0511400	peroxiredoxin, putative	-0.927977	0.036728	other
PBANKA_0510400	conserved protein, unknown function	-0.927421	1.9379e-05	female
PBANKA_1358200	conserved Plasmodium protein, unknown function	-0.926438	0.000610115	other
PBANKA_0811900	cytosolic Fe-S cluster assembly factor NBP35, putative	-0.922285	0.00142557	other	●
PBANKA_1206800	zinc finger (CCCH type) protein, putative	-0.922236	0.0024274	male
PBANKA_1315000	E3 SUMO-protein ligase NSE2, putative	-0.920307	0.0154318	other
PBANKA_1332700	duffy-binding protein	-0.911246	0.485236	other
PBANKA_1231500	ubiquitin carboxyl-terminal hydrolase 2, putative	-0.910163	1.43925e-08	other
PBANKA_0817100	thioredoxin 3, putative	-0.90923	2.85313e-05	female		●
PBANKA_0717700	conserved Plasmodium protein, unknown function	-0.907743	2.18718e-05	other
PBANKA_1334600	diacylglycerol kinase, putative	-0.906763	0.00835569	other
PBANKA_1455700	conserved Plasmodium protein, unknown function	-0.90665	0.00340637	other	●
PBANKA_1422800	conserved Plasmodium protein, unknown function	-0.903105	0.00860408	other	●	●
PBANKA_1136200	ATP synthase-associated protein, putative	-0.899533	0.0322571	other
PBANKA_1133200	cdc2-related kinase 2	-0.896621	0.00856546	other
PBANKA_1305400	conserved Plasmodium protein, unknown function	-0.893385	0.000705019	other
PBANKA_1134800	zinc finger protein, putative	-0.893332	1.71986e-05	other
PBANKA_0602600	cytochrome c1 heme lyase	-0.888968	0.00183996	other	●
PBANKA_0503800	conserved Plasmodium protein, unknown function	-0.885965	6.38575e-05	female
PBANKA_0601100	mitochondrial phosphate carrier protein, putative	-0.884806	0.000162176	other
PBANKA_0931100	conserved protein, unknown function	-0.8799	0.000489719	other	●	●
PBANKA_0714200	chaperone protein ClpB1, putative	-0.878973	2.98214e-05	other
PBANKA_0713000	conserved Plasmodium protein, unknown function	-0.877285	0.00617549	other	●
PBANKA_1023100	conserved Plasmodium protein, unknown function	-0.876908	1.2574e-06	female
PBANKA_1225600	alpha/beta hydrolase, putative	-0.874482	0.00442304	female
PBANKA_0504100	autophagy-related protein 8	-0.871905	0.00372315	other
PBANKA_0915600	aquaglyceroporin	-0.871672	0.0283274	other	●
PBANKA_1416000	conserved protein, unknown function	-0.871232	0.0014495	other	●
PBANKA_0209000	conserved Plasmodium protein, unknown function	-0.87106	9.20168e-05	other
PBANKA_1318300	mitochondrial ribosomal protein S11 precursor, putative	-0.867542	0.0190556	other
PBANKA_1231400	sporozoite surface antigen MB2, putative	-0.866763	1.72085e-05	other
PBANKA_0806000	ubiquitin-conjugating enzyme E2, putative	-0.866188	0.000168738	other
PBANKA_1445100	ATP-dependent protease subunit ClpQ, putative	-0.863021	0.0368486	other
PBANKA_0619500	conserved Plasmodium protein, unknown function	-0.862693	4.97313e-05	other
PBANKA_0929700	haloacid dehalogenase-like hydrolase, putative	-0.862062	0.000365223	other
PBANKA_0511300	mitochondrial ribosomal protein S22 precursor, putative	-0.860188	0.00202431	other
PBANKA_1118100	phosphatidylinositol N-acetylglucosaminyltransferase subunit GPI1, putative	-0.858822	1.11624e-06	other
PBANKA_0701600	coiled-coil domain-containing protein 124, putative	-0.857791	0.0124871	other
PBANKA_0711200	conserved protein, unknown function	-0.855769	0.0409203	other
PBANKA_0816300	heptatricopeptide repeat-containing protein, putative	-0.855405	0.000564016	other
PBANKA_0512200	protoporphyrinogen oxidase, putative	-0.854879	4.29996e-06	female
PBANKA_1433600	thrombospondin-related apical membrane protein	-0.854016	0.0598959	female
PBANKA_0406600	conserved Plasmodium protein, unknown function	-0.85247	0.436435	other
PBANKA_0300600	Plasmodium exported protein, unknown function	-0.851934	0.068788	other
PBANKA_0406900	conserved protein, unknown function	-0.851577	0.0846417	female
PBANKA_1206600	26S protease regulatory subunit 4, putative	-0.850829	0.0069363	other
PBANKA_1138400	calpain, putative	-0.849873	3.15502e-06	other
PBANKA_1207500	ribonuclease, putative	-0.848827	0.0214145	other
PBANKA_1010700	queuine tRNA-ribosyltransferase, putative	-0.847961	0.00199372	other
PBANKA_1457900	conserved protein, unknown function	-0.845551	0.0328121	other	●
PBANKA_1209600	BET1-like protein, putative	-0.845461	0.0111497	other
PBANKA_0208600	conserved protein, unknown function	-0.84434	7.28884e-05	other
PBANKA_1124100	conserved Plasmodium protein, unknown function	-0.842309	1.76303e-05	other
PBANKA_0103000	mitochondrial ribosomal protein L41, putative	-0.841942	0.00937838	other
PBANKA_1031700	ankyrin-repeat protein, putative	-0.83587	0.0250844	male
PBANKA_0515300	conserved Plasmodium protein, unknown function	-0.832644	5.04315e-05	female
PBANKA_0101100	liver merozoite formation protein	-0.832262	0.00171452	female	●
PBANKA_0523700	conserved Plasmodium protein, unknown function	-0.831895	0.174032	other
PBANKA_1207900	protein phosphatase PPM10, putative	-0.829969	0.0550617	other
PBANKA_0834400	mitochondrial-processing peptidase subunit beta, putative	-0.82785	5.0771e-07	other
PBANKA_0704400	alpha/beta hydrolase, putative	-0.8269	0.000811637	other
PBANKA_0210200	aspartate--tRNA ligase, putative	-0.825552	0.00046293	other
PBANKA_1427000	protein phosphatase PPM7	-0.824777	0.000347851	other
PBANKA_0810500	apoptosis-related protein, putative	-0.824178	0.000247616	other
PBANKA_1434800	aminophospholipid-transporting P-ATPase, putative	-0.822159	1.20296e-07	other
PBANKA_0304100	conserved Plasmodium protein, unknown function	-0.821206	0.0266888	other
PBANKA_1402500	condensin complex subunit 2, putative	-0.820403	0.00150129	other
PBANKA_0815800	GINS complex subunit Psf3, putative	-0.820324	0.00257962	other	●
PBANKA_0308400	UDP-N-acetylglucosamine transferase subunit ALG14, putative	-0.819856	0.0885207	other
PBANKA_1361000	step II splicing factor, putative	-0.816063	0.00654618	other
PBANKA_0831600	conserved Plasmodium protein, unknown function	-0.815846	0.000657592	other	●
PBANKA_0943600	60S acidic ribosomal protein P1, putative	-0.81524	0.00184462	other	●
PBANKA_0417400	GTPase-activating protein, putative	-0.812652	4.07973e-05	other		●
PBANKA_1419500	conserved protein, unknown function	-0.811931	0.046909	other
PBANKA_1032100	rhoptry-associated protein 1	-0.8115	NA	other		●
PBANKA_0510000	conserved protein, unknown function	-0.808814	0.0038569	other
PBANKA_1336400	DnaJ protein, putative	-0.8047	0.0620852	male
PBANKA_1028800	DnaJ protein, putative	-0.802441	0.00053749	other
PBANKA_1223300	ras-related protein Rab-18, putative	-0.802213	0.00143689	other
PBANKA_1130100	RNA polymerase II transcription factor B subunit 4, putative	-0.799796	0.00334961	other
PBANKA_1238700	MerC domain-containing protein, putative	-0.798446	0.00395482	other
PBANKA_0209100	thrombospondin-related sporozoite protein	-0.798311	0.0728944	other
PBANKA_1115400	BolA-like protein, putative	-0.797752	0.00284388	other
PBANKA_1218600	conserved protein, unknown function	-0.796541	6.47036e-05	other	●
PBANKA_1245100	conserved Plasmodium protein, unknown function	-0.79578	0.00267628	other
PBANKA_1233200	cyclin	-0.795723	0.00240584	other
PBANKA_1318900	methyltransferase, putative	-0.793082	0.0159216	male
PBANKA_1142700	phosphatidylserine synthase, putative	-0.792254	0.00492418	other
PBANKA_0920500	conserved Plasmodium protein, unknown function	-0.791614	0.000447815	other
PBANKA_0517000	early transcribed membrane protein	-0.789052	0.0123337	other	●
PBANKA_1139500	CCR4 domain-containing protein 2, putative	-0.788272	0.00622873	other
PBANKA_1358000	thioredoxin 2	-0.788096	0.00582118	other
PBANKA_0801400	conserved protein, unknown function	-0.787996	0.00191844	other
PBANKA_0712000	U3 small nucleolar ribonucleoprotein protein IMP4, putative	-0.784007	0.00102695	other
PBANKA_0519200	conserved Plasmodium protein, unknown function	-0.781308	0.547569	other
PBANKA_1413500	conserved Plasmodium protein, unknown function	-0.779407	0.0245403	other
PBANKA_1453000	conserved Plasmodium protein, unknown function	-0.777452	0.000201521	other
PBANKA_0815900	BSD-domain protein, putative	-0.777272	0.0128846	other	●
PBANKA_1126200	protein DJ-1, putative	-0.776283	0.0123767	other
PBANKA_1218900	elongation factor 1-delta, putative	-0.773832	0.000482262	other
PBANKA_1362500	peptidase, putative	-0.772906	0.000244182	female
PBANKA_0603900	HAD domain ookinete protein	-0.77163	0.277188	other
PBANKA_0714600	vacuolar protein sorting-associated protein 2, putative	-0.770445	0.00449103	female
PBANKA_0708600	quinone oxidoreductase, putative	-0.769584	0.00536113	other
PBANKA_0816100	SUMO-conjugating enzyme UBC9, putative	-0.76744	7.60349e-06	other
PBANKA_0816600	conserved Plasmodium protein, unknown function	-0.767382	0.00921222	other
PBANKA_1352400	conserved protein, unknown function	-0.766871	2.29399e-05	other	●
PBANKA_0908900	V-type proton ATPase subunit F, putative	-0.766695	0.00761355	other
PBANKA_1305600	mitochondrial inner membrane protease ATP23, putative	-0.764459	1.3916e-05	other
PBANKA_0813800	tRNA (adenine(58)-N(1))-methyltransferase non-catalytic subunit TRM6, putative	-0.76334	7.26999e-06	other
PBANKA_0515400	conserved Plasmodium protein, unknown function	-0.7626	0.000915345	other
PBANKA_1307000	conserved Plasmodium protein, unknown function	-0.760503	6.12663e-07	other
PBANKA_1409200	RNA-binding protein, putative	-0.760035	0.118449	other
PBANKA_0514300	conserved Plasmodium protein, unknown function	-0.759049	0.0117334	other
PBANKA_0601500	trimethylguanosine synthase, putative	-0.757107	2.51058e-05	other
PBANKA_1117500	ribosomal protein L27a, putative	-0.755866	0.00832005	other
PBANKA_1325000	40S ribosomal protein S28e, putative	-0.754924	6.85636e-05	other
PBANKA_1201700	N-terminal acetyltransferase A complex catalytic subunit ARD1, putative	-0.754008	0.021682	other
PBANKA_0619000	conserved Plasmodium protein, unknown function	-0.75135	6.55195e-05	other	●
PBANKA_1233700	conserved protein, unknown function	-0.751327	0.0204645	female
PBANKA_1145800	membrane associated histidine-rich protein 1a	-0.748563	0.119995	other
PBANKA_0506900	phospholipid scramblase, putative	-0.745996	5.10986e-06	other	●
PBANKA_1027700	uracil-DNA glycosylase, putative	-0.745797	0.00276673	other
PBANKA_0816900	conserved Plasmodium protein, unknown function	-0.74397	0.0022246	other		●
PBANKA_1110900	conserved Plasmodium protein, unknown function	-0.742869	0.0705792	other
PBANKA_0935700	Josephin domain-containing protein, putative	-0.742238	0.006611	other
PBANKA_0105900	uroporphyrinogen III decarboxylase	-0.742101	0.00025637	other
PBANKA_0926400	serine/threonine protein kinase, putative	-0.741257	0.000150232	other
PBANKA_0707700	conserved Plasmodium protein, unknown function	-0.740287	0.455967	other
PBANKA_0507100	CDGSH iron-sulfur domain-containing protein, putative	-0.734613	0.0199145	other
PBANKA_0719200	mRNA-binding protein PUF2	-0.734048	0.000985724	other
PBANKA_0937600	conserved Plasmodium protein, unknown function	-0.73239	0.0177345	other
PBANKA_0307200	monocarboxylate transporter, putative	-0.731374	0.00249077	other
PBANKA_1036200	RNA-binding protein 8A, putative	-0.730529	0.0180066	other
PBANKA_0305800	conserved Plasmodium protein, unknown function	-0.730013	0.00384107	other
PBANKA_1024800	ATP synthase-associated protein, putative	-0.729636	0.0120205	other	●
PBANKA_1025700	inner membrane complex protein 1l, putative	-0.725226	0.0275337	other
PBANKA_0937000	mitochondrial ribosomal protein L11 precursor, putative	-0.724629	0.0227596	other
PBANKA_1210600	rhoptry associated adhesin, putative	-0.724354	0.0228826	other
PBANKA_1347000	conserved protein, unknown function	-0.723405	0.00630766	female
PBANKA_1029000	conserved Plasmodium protein, unknown function	-0.723383	0.118361	other
PBANKA_1407600	60S ribosomal protein L24, putative	-0.723173	0.0554822	other	●
PBANKA_0710600	phosphatidylglycerophosphate synthase, putative	-0.720086	0.00035217	other	●
PBANKA_1418800	SNARE protein, putative	-0.717979	0.00284106	other
PBANKA_1436400	conserved Plasmodium protein, unknown function	-0.714356	0.0386822	female		●
PBANKA_1105700	60S ribosomal subunit protein L24, putative	-0.712859	0.00710985	other
PBANKA_1234100	protoheme IX farnesyltransferase, putative	-0.706833	0.000301551	other	●
PBANKA_1009000	GTPase Era, putative	-0.706225	0.00329386	other
PBANKA_0901200	peroxisome assembly protein 22, putative	-0.705459	0.0108567	other
PBANKA_1121500	cytochrome b-c1 complex subunit 9, putative	-0.704126	0.00669146	other
PBANKA_1111900	CDK-activating kinase assembly factor MAT1, putative	-0.700737	0.00861068	other
PBANKA_0202800	adenylate kinase-like protein 1, putative	-0.69837	0.0234815	other
PBANKA_1229700	conserved Plasmodium protein, unknown function	-0.697018	0.0568029	other
PBANKA_1301300	trailer hitch homolog	-0.696582	0.00295163	female	●
PBANKA_0611500	conserved Plasmodium protein, unknown function	-0.696284	0.0999207	male
PBANKA_0932700	conserved protein, unknown function	-0.695963	0.00637336	other
PBANKA_0109700	SWIB/MDM2 domain-containing protein, putative	-0.694155	0.0009145	other
PBANKA_1126700	6-pyruvoyltetrahydropterin synthase, putative	-0.689731	0.0438341	other
PBANKA_0817700	RNA-binding protein musashi, putative	-0.689356	7.59873e-06	other
PBANKA_0705000	cytochrome c oxidase assembly factor 5, putative	-0.68705	0.0187615	other
PBANKA_0109300	SNARE associated Golgi protein, putative	-0.685843	0.0505973	other
PBANKA_1213700	methionine aminopeptidase 1b, putative	-0.684942	0.00934657	other
PBANKA_1212000	conserved Plasmodium protein, unknown function	-0.683829	0.0123006	other	●
PBANKA_0511500	DNA-directed RNA polymerase II subunit RPB7, putative	-0.681947	0.0119269	other
PBANKA_1327100	EF-hand calcium-binding domain-containing protein, putative	-0.681615	0.21623	male
PBANKA_0300700	nucleic acid binding protein, putative	-0.680796	0.00393319	female	●
PBANKA_1207700	zinc finger protein, putative	-0.679028	0.0914895	other
PBANKA_1128900	conserved Plasmodium protein, unknown function	-0.676356	0.000162176	other
PBANKA_0907000	heptatricopeptide repeat-containing protein, putative	-0.675603	0.0167418	female	●
PBANKA_1303500	cytochrome c oxidase subunit ApiCOX26, putative	-0.675232	0.00108944	other	●
PBANKA_1320500	V-type H(+)-translocating pyrophosphatase, putative	-0.675061	0.0178214	other
PBANKA_1324300	inner membrane complex sub-compartment protein 3	-0.671505	0.174032	other	●
PBANKA_0816700	cytochrome c oxidase subunit ApiCOX30, putative	-0.671504	0.000771824	other
PBANKA_0708900	conserved protein, unknown function	-0.67144	0.0468137	other
PBANKA_1453800	conserved Plasmodium protein, unknown function	-0.671312	0.00776785	other
PBANKA_1447000	cytochrome b5, putative	-0.670943	0.00649456	other	●
PBANKA_1305700	vacuolar protein sorting-associated protein 60, putative	-0.668814	0.00400886	female	●
PBANKA_1319100	hemolysin III, putative	-0.668367	0.0220853	other
PBANKA_0609800	DNA helicase MCM8, putative	-0.667411	0.0380852	other	●
PBANKA_0820200	thioredoxin-like protein 1, putative	-0.667231	0.262345	female
PBANKA_1408000	H/ACA ribonucleoprotein complex subunit 1, putative	-0.666895	0.00781404	other
PBANKA_0717600	GTP:AMP phosphotransferase, putative	-0.666796	0.00746463	other
PBANKA_1217600	histone H2A.Z, putative	-0.665328	0.518128	other		●
PBANKA_0619200	secreted ookinete protein, putative	-0.665028	0.000716664	other	●	●
PBANKA_1435600	debranching enzyme-associated ribonuclease, putative	-0.664897	0.146963	other
PBANKA_1320600	conserved protein, unknown function	-0.664535	0.00987162	other
PBANKA_1452400	ubiquitin-like modifier HUB1, putative	-0.664352	0.0934517	other
PBANKA_0520800	conserved Plasmodium protein, unknown function	-0.662199	0.0874316	other
PBANKA_1324100	ubiquitin carboxyl-terminal hydrolase isozyme L3, putative	-0.661381	0.00748598	other
PBANKA_0920300	conserved Plasmodium protein, unknown function	-0.660947	0.000866496	other	●
PBANKA_1424300	conserved protein, unknown function	-0.658526	0.0819452	other
PBANKA_0810000	mitochondrial carrier protein, putative	-0.657993	0.00145237	other
PBANKA_0402600	inner membrane complex protein 1a	-0.657894	0.0312628	other
PBANKA_1354400	60S ribosomal protein L18, putative	-0.655927	0.0213548	other	●
PBANKA_0705300	SAYSvFN domain-containing protein, putative	-0.655556	0.0147001	other		●
PBANKA_1441900	DNA helicase 60, putative	-0.655079	0.01337	other
PBANKA_0313400	autophagy-related protein 11, putative	-0.652471	0.262255	other
PBANKA_0514000	transcription elongation factor SPT4, putative	-0.651844	0.118689	other
PBANKA_0719800	conserved Plasmodium protein, unknown function	-0.650624	0.0259751	other
PBANKA_1448000	pentatricopeptide repeat domain-containing protein, putative	-0.648623	0.00930922	other	●
PBANKA_0926700	exported protein 1	-0.647228	0.21629	other
PBANKA_1358500	inner membrane complex protein, putative	-0.646843	0.117424	other
PBANKA_0514200	claudin-like apicomplexan microneme protein, putative	-0.646254	0.160736	other
PBANKA_1363900	conserved protein, unknown function	-0.645699	0.00704979	other
PBANKA_1420600	histone H2B variant, putative	-0.64518	0.158549	other	●
PBANKA_1324800	conserved Plasmodium protein, unknown function	-0.644526	0.0487215	female	●	●
PBANKA_0304200	DNA-directed RNA polymerase III subunit RPC10, putative	-0.644125	0.019497	other
PBANKA_0512300	RING zinc finger protein, putative	-0.642824	0.00655131	other
PBANKA_1009100	ataxin-2 like protein, putative	-0.640611	0.00617691	other	●	●
PBANKA_0213800	conserved protein, unknown function	-0.640329	0.00327359	female
PBANKA_1449700	conserved protein, unknown function	-0.640309	0.0370532	other	●	●
PBANKA_1449800	inorganic pyrophosphatase, putative	-0.63763	0.00811557	other	●
PBANKA_1346200	signal peptidase complex catalytic subunit SEC11, putative	-0.636053	0.00325152	other	●
PBANKA_0510700	conserved Plasmodium protein, unknown function	-0.63529	0.32211	other
PBANKA_1353900	conserved Plasmodium protein, unknown function	-0.633295	0.0473029	female	●
PBANKA_0603600	conserved protein, unknown function	-0.633201	0.113518	other
PBANKA_1352600	serine/threonine protein kinase, putative	-0.632565	0.00641782	other
PBANKA_0710200	conserved protein, unknown function	-0.632235	0.023694	other
PBANKA_1219200	Cg8 protein, putative	-0.631918	0.0433121	other
PBANKA_0801000	conserved Plasmodium protein, unknown function	-0.631044	0.0950861	other
PBANKA_1363400	conserved Plasmodium protein, unknown function	-0.629464	0.0675237	other
PBANKA_1439000	conserved protein, unknown function	-0.628708	0.0201599	other
PBANKA_0928900	conserved protein, unknown function	-0.628493	0.105944	other
PBANKA_1131200	60S ribosomal protein L7-2, putative	-0.625915	0.154928	other
PBANKA_0304900	serine repeat antigen 3	-0.625035	0.608175	other
PBANKA_0301100	conserved Plasmodium protein, unknown function	-0.623333	0.00111818	other	●
PBANKA_1108600	alpha-soluble NSF attachment protein, putative	-0.622591	0.0560996	other		●
PBANKA_0832000	selenoprotein, putative	-0.622545	0.344598	other
PBANKA_1456700	conserved Plasmodium protein, unknown function	-0.622356	0.229542	female
PBANKA_0905100	ATP-dependent (S)-NAD(P)H-hydrate dehydratase, putative	-0.621552	0.10976	other
PBANKA_0905400	conserved Plasmodium protein, unknown function	-0.620797	0.0233923	other
PBANKA_1435800	conserved Plasmodium protein, unknown function	-0.620745	0.0104237	other
PBANKA_1022600	pantothenate kinase 1, putative	-0.619219	0.0120205	other
PBANKA_1445800	ras-related protein Rab-2, putative	-0.618841	0.0100866	other	●
PBANKA_1004000	cytosolic glyoxalase II, putative	-0.616226	0.0231563	other
PBANKA_1320700	signal peptide peptidase, putative	-0.61525	0.000324769	other	●	●
PBANKA_0516400	conserved protein, unknown function	-0.613176	0.0364062	other
PBANKA_1351100	exoribonuclease, putative	-0.612937	0.000645437	other	●
PBANKA_0404700	glutaredoxin 1, putative	-0.611829	0.00984155	other	●
PBANKA_0203900	rRNA biogenesis protein RRP36, putative	-0.611232	0.203497	other
PBANKA_0711700	BRIX domain, putative	-0.610299	0.0115737	other
PBANKA_1002500	conserved Plasmodium protein, unknown function	-0.608292	0.00106631	other		●
PBANKA_1028000	ubiquitin carboxyl-terminal hydrolase, putative	-0.606949	0.00149594	other	●
PBANKA_1360000	DNA topoisomerase 3, putative	-0.606934	0.00833481	other
PBANKA_1214800	U4/U6.U5 tri-snRNP-associated protein 1, putative	-0.606178	0.00366438	other
PBANKA_0614600	drug/metabolite transporter DMT2	-0.604335	0.10788	other
PBANKA_1302900	copper transporter, putative	-0.604083	0.0336647	other	●
PBANKA_1003200	conserved Plasmodium protein, unknown function	-0.598634	0.0774068	other
PBANKA_1443200	RNA pseudouridylate synthase, putative	-0.598049	0.0652973	other
PBANKA_1349100	MSP7-like protein	-0.597164	0.67256	other		●
PBANKA_1141800	conserved Plasmodium protein, unknown function	-0.596144	0.055523	other
PBANKA_0836100	phosphatidylinositol N-acetylglucosaminyltransferase subunit P, putative	-0.596024	0.0126981	other
PBANKA_0821600	CRAL/TRIO domain-containing protein, putative	-0.594054	0.216226	other	●
PBANKA_1439800	splicing factor 3B subunit 6, putative	-0.593914	0.0417225	other
PBANKA_1134700	conserved Plasmodium protein, unknown function	-0.593606	0.126493	other
PBANKA_0400900	conserved protein, unknown function	-0.592767	0.0703772	other
PBANKA_1458500	NEDD8-conjugating enzyme UBC12, putative	-0.592379	0.102763	other
PBANKA_1035000	conserved Plasmodium protein, unknown function	-0.59181	0.0306456	other
PBANKA_1458900	epsin-like protein, putative	-0.591304	0.000365223	other
PBANKA_0819800	gamma-glutamylcysteine synthetase	-0.591265	0.000237271	other
PBANKA_1228200	glutamate dehydrogenase, putative	-0.591177	0.0147857	other	●
PBANKA_0100800	zinc finger protein, putative	-0.588335	0.0850582	other
PBANKA_0826400	zinc binding protein (Yippee), putative	-0.58784	0.0827431	other
PBANKA_0613700	RNA-binding protein, putative	-0.586511	0.00288624	other
PBANKA_1444200	conserved Plasmodium protein, unknown function	-0.584408	0.0246511	other	●
PBANKA_0931800	pyridoxine biosynthesis protein PDX2, putative	-0.583767	0.0133028	other
PBANKA_1460600	conserved Plasmodium protein, unknown function	-0.583288	0.000623336	other	●
PBANKA_1027900	small nuclear ribonucleoprotein-associated protein B, putative	-0.582928	0.0454085	other
PBANKA_1419700	palmitoyltransferase DHHC8, putative	-0.582718	0.114956	other
PBANKA_1112600	AKAP-like protein, putative	-0.58149	0.0130588	other
PBANKA_0611700	conserved protein, unknown function	-0.580606	0.00310682	other
PBANKA_0311500	conserved Plasmodium protein, unknown function	-0.579504	0.179207	female	●
PBANKA_0835200	AP2 domain transcription factor, putative	-0.577945	0.0123006	other
PBANKA_1210700	cytochrome b-c1 complex subunit 7, putative	-0.575781	0.0224536	other
PBANKA_0510200	conserved Plasmodium protein, unknown function	-0.57458	0.146293	other
PBANKA_0408700	trafficking protein particle complex subunit 4, putative	-0.572189	0.000588606	other
PBANKA_1220400	conserved protein, unknown function	-0.571266	0.0727416	other	●
PBANKA_1027500	DNA-directed RNA polymerases I and III subunit RPAC2, putative	-0.571094	0.0716605	other
PBANKA_1422300	FAD-dependent monooxygenase, putative	-0.569556	0.0328204	other	●
PBANKA_0923500	ribosome biogenesis regulatory protein, putative	-0.56923	0.0715605	other
PBANKA_0213600	mRNA (N6-adenosine)-methyltransferase, putative	-0.569018	0.0264943	other
PBANKA_1359200	DNA/RNA-binding protein Alba 2, putative	-0.568404	0.0200121	other
PBANKA_0210300	seipin domain-containing protein, putative	-0.565461	0.010974	other		●
PBANKA_1028700	26S proteasome regulatory subunit RPN13, putative	-0.565116	0.0148515	female	●
PBANKA_0418200	ras-related protein RAB7, putative	-0.563712	0.00987162	other
PBANKA_1416500	conserved protein, unknown function	-0.563474	0.102542	other
PBANKA_1409800	ATP synthase subunit gamma, mitochondrial, putative	-0.560002	0.181584	other
PBANKA_1317700	RNA-binding protein, putative	-0.55964	0.124741	other
PBANKA_1132600	ubiquitin-conjugating enzyme E2, putative	-0.559032	0.174662	other		●
PBANKA_1004400	ribosomal protein L25, putative	-0.558548	0.0174327	other
PBANKA_0205100	mitochondrial carrier protein, putative	-0.557754	0.0875445	other	●
PBANKA_0811000	small nuclear ribonucleoprotein Sm D3, putative	-0.556521	0.0680171	other
PBANKA_1424400	CS domain protein, putative	-0.553519	0.0355901	other
PBANKA_1462900	rRNA-processing protein FCF2, putative	-0.552143	0.0339389	other
PBANKA_0910600	ubiquitin-related modifier 1, putative	-0.550308	0.0213286	other
PBANKA_1339400	micro-fibrillar-associated protein, putative	-0.548563	0.0587079	other
PBANKA_1454500	polyadenylation factor subunit 2, putative	-0.548421	0.0201354	other
PBANKA_0622300	kelch domain-containing protein, putative	-0.548	0.00760447	other
PBANKA_0409900	heptatricopeptide repeat-containing protein, putative	-0.547237	0.0257269	other
PBANKA_0517500	bromodomain protein 1, putative	-0.547003	0.0151608	other
PBANKA_0111500	conserved Plasmodium protein, unknown function	-0.546908	0.115326	other
PBANKA_0413800	microneme associated antigen, putative	-0.546063	0.0627095	other
PBANKA_0903300	bicoid-interacting protein BIN3, putative	-0.544688	0.035434	other
PBANKA_0516800	heptatricopeptide repeat-containing protein HPR1	-0.54467	0.00624299	other	●
PBANKA_0709700	protein kinase 1	-0.544408	0.0341383	other
PBANKA_1037300	conserved Plasmodium protein, unknown function	-0.544254	0.000357493	other
PBANKA_0915500	glycine cleavage system H protein, putative	-0.543747	0.222777	other
PBANKA_0600800	cytochrome c oxidase assembly protein COX19, putative	-0.543659	0.0061441	other	●
PBANKA_1135200	GTP-binding protein, putative	-0.543342	0.0522965	other
PBANKA_1452200	periodic tryptophan protein 1, putative	-0.542429	0.0291069	other
PBANKA_1142600	conserved Plasmodium protein, unknown function	-0.542223	0.114951	other
PBANKA_0805800	RNA-binding protein, putative	-0.540409	0.108324	other
PBANKA_1343800	transcriptional regulatory protein sir2a	-0.540081	0.0936388	other
PBANKA_1332400	shewanella-like protein phosphatase 1	-0.539503	0.00814783	other
PBANKA_1339100	protein BCP1, putative	-0.537919	0.128758	other
PBANKA_0109600	ATP synthase-associated protein, putative	-0.537841	0.0300985	other	●
PBANKA_0904400	transcription initiation factor IIF subunit beta, putative	-0.537212	0.0917801	other	●
PBANKA_0834700	conserved Plasmodium protein, unknown function	-0.536984	0.0784857	other
PBANKA_1205600	conserved protein, unknown function	-0.536751	0.0955772	other
PBANKA_0401300	CDGSH iron-sulfur domain-containing protein, putative	-0.535988	0.00374997	other	●
PBANKA_1352100	SprT-like domain-containing protein, putative	-0.535979	0.146293	male
PBANKA_1136600	conserved Plasmodium protein, unknown function	-0.534849	0.0777067	other
PBANKA_1449100	conserved Plasmodium protein, unknown function	-0.534721	0.0518075	other	●
PBANKA_0512400	rRNA-processing protein EBP2, putative	-0.534563	0.00597469	other
PBANKA_1025400	cysteine protease ATG4, putative	-0.533789	0.0171146	other
PBANKA_1002800	protein transport protein Sec24B, putative	-0.532676	0.00309281	other	●
PBANKA_1020800	conserved Plasmodium protein, unknown function	-0.531727	0.0326761	other		●
PBANKA_1437200	conserved Plasmodium protein, unknown function	-0.53159	0.00135754	other
PBANKA_0927500	conserved Plasmodium protein, unknown function	-0.531173	0.0288324	male	●
PBANKA_0309500	secreted protein with altered thrombospondin repeat domain, putative	-0.530811	0.408189	other
PBANKA_0602400	major facilitator superfamily domain-containing protein, putative	-0.530567	0.00725118	other
PBANKA_0938500	succinyl-CoA synthetase alpha subunit, putative	-0.528951	0.0562039	other
PBANKA_0926300	conserved protein, unknown function	-0.52722	0.031854	other
PBANKA_1432900	GTP-binding protein EngA, putative	-0.525776	0.00333831	other
PBANKA_0905300	conserved Plasmodium protein, unknown function	-0.523456	0.0498796	other
PBANKA_1241900	ubiquitin-conjugating enzyme E2 N, putative	-0.52217	0.12863	other
PBANKA_1407500	conserved protein, unknown function	-0.518999	0.0887335	other
PBANKA_1138000	cytochrome c oxidase subunit ApiCOX24, putative	-0.517327	0.0749668	other
PBANKA_1354300	sodium-dependent phosphate transporter, putative	-0.515671	0.0205645	other
PBANKA_1350200	conserved Plasmodium protein, unknown function	-0.515261	0.177825	male
PBANKA_0408800	conserved Plasmodium protein, unknown function	-0.514895	0.0106949	other
PBANKA_1363200	ubiquitin-activating enzyme E1, putative	-0.512552	0.0988494	other
PBANKA_1353700	nucleolar complex protein 2, putative	-0.512064	0.17257	other
PBANKA_1101900	HCNGP-like protein, putative	-0.51199	0.0355901	other
PBANKA_0820100	PPPDE peptidase, putative	-0.510283	0.112495	female
PBANKA_0519700	phosducin-like protein 2, putative	-0.508078	0.0292408	other
PBANKA_1013800	cytochrome c oxidase subunit 2, putative	-0.507822	0.0084944	other
PBANKA_1242800	eukaryotic translation initiation factor 3 subunit E, putative	-0.507613	0.0564386	other	●
PBANKA_0205000	conserved Plasmodium protein, unknown function	-0.507108	0.194124	other	●
PBANKA_1145400	Plasmodium exported protein (PHIST), unknown function	-0.506833	0.378264	other
PBANKA_1004700	methyltransferase, putative	-0.506754	0.18616	other
PBANKA_1001400	pre-mRNA-splicing factor CLF1, putative	-0.506189	0.0411283	other
PBANKA_1027200	conserved Plasmodium protein, unknown function	-0.50543	0.141584	other
PBANKA_0836000	vacuolar protein sorting-associated protein 33, putative	-0.505414	0.162974	other
PBANKA_0904700	60S ribosomal protein L41, putative	-0.504182	0.0703772	other
PBANKA_0709400	conserved Plasmodium protein, unknown function	-0.49906	0.0471253	other
PBANKA_1346100	conserved Plasmodium protein, unknown function	-0.498301	0.0704081	other
PBANKA_1451800	conserved Plasmodium protein, unknown function	-0.497241	0.0330152	other	●
PBANKA_1202400	60S ribosomal protein L13, putative	-0.494872	0.216682	other
PBANKA_0919700	Fe-S cluster assembly protein, putative	-0.494682	0.0640826	other
PBANKA_0206700	conserved Plasmodium protein, unknown function	-0.494591	0.188751	male
PBANKA_1028900	diphthamide biosynthesis protein 1, putative	-0.494485	0.387422	other
PBANKA_0803400	40S ribosomal protein S29, putative	-0.494082	0.0871459	other
PBANKA_0415900	conserved protein, unknown function	-0.492545	0.243113	male		●
PBANKA_1120300	mRNA-binding protein PUF3, putative	-0.492016	0.152783	other
PBANKA_1231000	40S ribosomal protein S11, putative	-0.491225	0.160821	other
PBANKA_1423900	translation initiation factor SUI1, putative	-0.49113	0.00826765	other
PBANKA_0617700	conserved protein, unknown function	-0.489833	0.0334732	other
PBANKA_0613600	phosphopantothenate--cysteine ligase, putative	-0.489264	0.0107662	other
PBANKA_1223400	conserved Plasmodium protein, unknown function	-0.48787	0.0383715	other
PBANKA_0601700	conserved Plasmodium protein, unknown function	-0.487495	0.216226	other
PBANKA_1023600	conserved Plasmodium protein, unknown function	-0.486349	0.00570232	other
PBANKA_1429800	conserved protein, unknown function	-0.486247	0.105452	other
PBANKA_0939900	U6 snRNA-associated Sm-like protein LSm4, putative	-0.485849	0.0687469	other
PBANKA_0202000	eukaryotic translation initiation factor 4E, putative	-0.485196	0.0250844	other
PBANKA_1004900	transcription factor, putative	-0.48513	0.283659	other
PBANKA_1338500	N-acetyltransferase, GNAT family, putative	-0.485016	0.115001	other
PBANKA_1118300	conserved Plasmodium protein, unknown function	-0.483629	0.0651097	other
PBANKA_1413400	general transcription factor IIH subunit 2, putative	-0.482962	0.108842	other
PBANKA_1035900	glycerophosphodiester phosphodiesterase, putative	-0.481629	0.0306559	other		●
PBANKA_0408100	50S ribosomal protein L9, apicoplast, putative	-0.481217	0.176445	other
PBANKA_1243200	conserved Plasmodium protein, unknown function	-0.479758	0.266518	other
PBANKA_0512600	partial CSTF domain-containing protein, putative	-0.478552	0.0505973	other
PBANKA_1001100	ubiquitin specific protease, putative	-0.477442	0.0119724	other
PBANKA_1124400	conserved Plasmodium protein, unknown function	-0.477381	0.241674	other
PBANKA_1407400	mRNA-decapping enzyme 2, putative	-0.475767	0.00334308	other
PBANKA_1238100	cytochrome c oxidase subunit ApiCOX18, putative	-0.474197	0.0194292	other
PBANKA_1414300	transcription factor MYB1, putative	-0.473842	0.0627924	other
PBANKA_1144600	mitochondrial carrier protein, putative	-0.473587	0.112995	other
PBANKA_1130900	large subunit rRNA methyltransferase, putative	-0.472904	0.003119	female
PBANKA_1454000	DNA gyrase subunit B, putative	-0.472237	0.00710662	other	●
PBANKA_0919800	bifunctional farnesyl/geranylgeranyl diphosphate synthase, putative	-0.472206	0.00446137	other
PBANKA_0713300	histidine triad nucleotide-binding protein 1, putative	-0.470936	0.113075	other
PBANKA_1318200	iron sulfur cluster assembly protein, putative	-0.470113	0.0541621	other
PBANKA_0504000	tRNA methyltransferase, putative	-0.468984	0.172635	other
PBANKA_0303800	cysteine desulfuration protein SufE	-0.466576	0.0944567	other
PBANKA_0831000	merozoite surface protein 1	-0.465962	0.748541	other		●
PBANKA_0620000	pre-mRNA-splicing factor CWC15, putative	-0.465283	0.164174	other
PBANKA_1106200	histone deacetylase, putative	-0.465094	0.0507545	other
PBANKA_0301300	conserved Plasmodium protein, unknown function	-0.464648	0.109343	other	●	●
PBANKA_1341100	conserved Plasmodium protein, unknown function	-0.463593	0.0749221	other
PBANKA_1119700	cleavage stimulation factor subunit 1, putative	-0.463044	0.00590102	other	●
PBANKA_0709200	polyribonucleotide 5'-hydroxyl-kinase Clp1, putative	-0.461798	0.0338406	other
PBANKA_1128700	phosphatidylinositol/phosphatidylcholine transfer protein, putative	-0.461139	0.1273	other
PBANKA_1025600	conserved Plasmodium protein, unknown function	-0.460556	0.027505	other
PBANKA_0100400	reticulocyte binding protein, putative	-0.46048	0.684492	other
PBANKA_1029100	conserved Plasmodium protein, unknown function	-0.459589	0.41993	other
PBANKA_1108200	conserved protein, unknown function	-0.458436	0.259735	other
PBANKA_1302700	OST-HTH associated domain protein, putative	-0.457287	0.0503114	other
PBANKA_0202900	transcription initiation factor TFIIB, putative	-0.456431	0.0167278	other	●
PBANKA_0607600	U6 snRNA-associated Sm-like protein LSm7, putative	-0.454053	0.127816	other
PBANKA_1240700	NIMA related kinase 2	-0.453221	0.15995	female		●
PBANKA_1300500	tubulin epsilon chain, putative	-0.452985	0.0965108	male	●
PBANKA_1141000	conserved protein, unknown function	-0.45085	0.208644	other
PBANKA_1038800	conserved Plasmodium protein, unknown function	-0.450717	0.0908781	other	●	●
PBANKA_0507500	conserved protein, unknown function	-0.450216	0.241674	other
PBANKA_1364100	conserved Plasmodium protein, unknown function	-0.449845	0.0331805	other	●
PBANKA_0706900	mitochondrial import receptor subunit TOM7, putative	-0.449719	0.112256	other	●
PBANKA_0203300	DNA-directed RNA polymerase II subunit RPB9, putative	-0.447295	0.0815511	other
PBANKA_1217800	signal peptidase complex subunit 2, putative	-0.446849	0.0442859	other	●
PBANKA_1225100	conserved Plasmodium protein, unknown function	-0.446701	0.119455	other
PBANKA_0720500	conserved Plasmodium protein, unknown function	-0.445271	0.147006	other
PBANKA_0935600	conserved protein, unknown function	-0.444152	0.120983	other	●
PBANKA_0931700	peptidyl-prolyl cis-trans isomerase, putative	-0.44333	0.0306494	other
PBANKA_0932300	AP2 domain transcription factor, putative	-0.442139	0.201814	other
PBANKA_0607700	telomere repeat-binding zinc finger protein, putative	-0.441782	0.00263358	other	●	●
PBANKA_1404300	conserved Plasmodium protein, unknown function	-0.441136	0.173375	other	●
PBANKA_0214500	IMP1-like protein, putative	-0.440608	0.0528581	other
PBANKA_1010400	conserved protein, unknown function	-0.44001	0.44689	other
PBANKA_0517100	conserved protein, unknown function	-0.438939	0.229685	other
PBANKA_1241700	transmembrane emp24 domain-containing protein, putative	-0.438204	0.192496	other
PBANKA_0930400	peptidyl-tRNA hydrolase ICT1, putative	-0.435024	0.145264	other
PBANKA_1026200	NADP-specific glutamate dehydrogenase, putative	-0.434045	0.345984	other
PBANKA_0808300	E3 ubiquitin-protein ligase, putative	-0.433817	0.216507	other
PBANKA_1411100	2-oxoisovalerate dehydrogenase subunit alpha, mitochondrial	-0.433654	0.0417523	other
PBANKA_1330800	DNA/RNA-binding protein KIN17, putative	-0.433166	0.0463866	other
PBANKA_0519300	conserved Plasmodium protein, unknown function	-0.432906	0.757932	other
PBANKA_1143500	ribosome biogenesis protein MRT4, putative	-0.432625	0.0703772	other	●
PBANKA_1235000	mediator of RNA polymerase II transcription subunit 17, putative	-0.432604	0.036177	other
PBANKA_0929100	acyl-CoA-binding protein, putative	-0.431606	0.0320787	other
PBANKA_1132100	splicing factor 3B subunit 5, putative	-0.431556	0.181771	other
PBANKA_1345300	DnaJ protein, putative	-0.431024	0.0648175	other	●
PBANKA_0917800	conserved oligomeric Golgi complex subunit 2, putative	-0.43092	0.216505	other
PBANKA_0104000	conserved protein, unknown function	-0.430882	0.20333	other	●
PBANKA_1224800	conserved protein, unknown function	-0.430046	0.0460753	other
PBANKA_1409000	ER membrane protein complex subunit 7, putative	-0.429147	0.0781046	other
PBANKA_1031300	rhomboid protease ROM8	-0.42818	0.0696834	other
PBANKA_0510900	40S ribosomal protein S2, putative	-0.427989	0.169085	other
PBANKA_1408800	zinc finger protein, putative	-0.427607	0.154608	other
PBANKA_0921500	small nuclear ribonucleoprotein F, putative	-0.427459	0.0999207	other
PBANKA_0520200	ADP/ATP transporter on adenylate translocase, putative	-0.427383	0.0746233	other
PBANKA_0203750	phosphatidate cytidylyltransferase, putative	-0.425926	0.127915	female
PBANKA_0510800	conserved Plasmodium protein, unknown function	-0.423785	0.131677	other	●
PBANKA_1459400	clathrin adaptor domain-containing protein, putative	-0.423057	0.00709605	other
PBANKA_1356200	tRNA guanosine-2'-O-methyltransferase, putative	-0.422442	0.108614	other
PBANKA_0802500	protein phosphatase PPM12, putative	-0.420876	0.074617	female
PBANKA_0410650	conserved Plasmodium protein, unknown function	-0.420752	0.22729	other
PBANKA_1437800	conserved Plasmodium protein, unknown function	-0.420153	0.0364062	other	●
PBANKA_1122400	superoxide dismutase [Fe], putative	-0.419557	0.0612159	other	●
PBANKA_1226800	DNA repair and recombination protein RAD54, putative	-0.419457	0.098455	other	●
PBANKA_1029500	conserved Plasmodium protein, unknown function	-0.418976	0.129476	male
PBANKA_1348500	Voldacs domain-containing protein, putative	-0.417192	0.261314	other
PBANKA_0920600	TFIIS central domain-containing protein, putative	-0.415908	0.1135	other
PBANKA_1221700	conserved protein, unknown function	-0.41574	0.105748	other
PBANKA_0821800	U4/U6 snRNA-associated-splicing factor, putative	-0.415582	0.0325194	other	●
PBANKA_0721500	conserved Plasmodium protein, unknown function	-0.41522	0.150362	other
PBANKA_1328400	cytochrome c oxidase subunit ApiCOX25, putative	-0.414703	0.00642934	other	●
PBANKA_0901300	membrane associated erythrocyte binding-like protein	-0.414422	0.0466271	other
PBANKA_0212800	alpha/beta hydrolase, putative	-0.414181	0.096743	female
PBANKA_0616000	mitochondrial ribosomal protein S8 precursor, putative	-0.413228	0.275852	other
PBANKA_1451500	conserved Plasmodium protein, unknown function	-0.413088	0.057448	female	●	●
PBANKA_1001600	SET domain protein, putative	-0.413037	0.0344496	other
PBANKA_1201900	40S ribosomal protein S20e, putative	-0.412289	0.0704081	other	●
PBANKA_1029700	ubiquitin-conjugating enzyme E2, putative	-0.411769	0.156176	other
PBANKA_0519100	conserved Plasmodium protein, unknown function	-0.411687	0.774021	other		●
PBANKA_1301600	vacuole membrane protein 1, putative	-0.411612	0.0379445	other
PBANKA_0910900	sporozoite surface protein essential for liver stage development	-0.41114	0.143331	male		●
PBANKA_0308800	GDP-fructose:GMP antiporter, putative	-0.410864	0.104661	other
PBANKA_1141700	ubiquitin-60S ribosomal protein L40, putative	-0.409974	0.131677	other
PBANKA_1403400	DNA-directed RNA polymerase II subunit RPB11, putative	-0.408806	0.0754819	other
PBANKA_1329500	protein phosphatase containing kelch-like domains	-0.408121	0.0435723	other
PBANKA_1029400	conserved Plasmodium protein, unknown function	-0.407708	0.27245	male
PBANKA_1404200	conserved Plasmodium protein, unknown function	-0.406218	0.276465	other
PBANKA_0915800	pre-mRNA-splicing factor 38A, putative	-0.406216	0.130701	other
PBANKA_1449500	conserved Plasmodium protein, unknown function	-0.406083	0.225185	other
PBANKA_0708500	phosphorylated CTD interacting factor 1 WW domain-containing protein, putative	-0.405861	0.152392	other
PBANKA_1212400	GDP-L-fucose synthase, putative	-0.405788	0.401657	other
PBANKA_1323400	bax inhibitor 1, putative	-0.403999	0.0589855	other
PBANKA_0614800	conserved Plasmodium protein, unknown function	-0.40328	0.186282	other	●
PBANKA_1344200	conserved Plasmodium protein, unknown function	-0.402973	0.253163	male
PBANKA_0938700	D-tyrosyl-tRNA(Tyr) deacylase, putative	-0.402085	0.199533	other	●
PBANKA_1343700	conserved Plasmodium protein, unknown function	-0.401916	0.111637	other	●
PBANKA_1430500	conserved protein, unknown function	-0.401905	0.173976	other
PBANKA_1016400	major facilitator superfamily domain-containing protein, putative	-0.401224	0.0169054	other
PBANKA_1403000	small heat shock protein, putative	-0.400697	0.255976	other
PBANKA_0922700	conserved protein, unknown function	-0.400369	0.165913	other
PBANKA_1141500	SNARE associated Golgi protein, putative	-0.400292	0.071728	other
PBANKA_1014000	NADP-specific glutamate dehydrogenase, putative	-0.399702	0.464396	other
PBANKA_1013200	succinyl-CoA ligase [ADP-forming] subunit beta, putative	-0.399055	0.0255941	other	●	●
PBANKA_1022000	40S ribosomal protein S25, putative	-0.398983	0.132132	other
PBANKA_0903700	cysteine-rich PDZ-binding protein, putative	-0.39746	0.205343	other	●
PBANKA_1242300	Hsc70-interacting protein, putative	-0.396538	0.201372	other
PBANKA_1416600	ferredoxin, putative	-0.396328	0.305982	other	●
PBANKA_0721000	conserved protein, unknown function	-0.39576	0.127754	other	●	●
PBANKA_1011900	H/ACA ribonucleoprotein complex subunit 3, putative	-0.395614	0.123949	other
PBANKA_1245700	conserved Plasmodium protein, unknown function	-0.395158	0.105482	other
PBANKA_1125500	ATPase, putative	-0.394871	0.0761289	other
PBANKA_1455500	conserved Plasmodium protein, unknown function	-0.394365	0.0393441	other
PBANKA_1336800	conserved Plasmodium protein, unknown function	-0.393961	0.275572	other
PBANKA_1208200	kinesin-4, putative	-0.393035	0.15087	female	●
PBANKA_0705100	protein KRI1, putative	-0.391216	0.123641	other
PBANKA_0934800	conserved protein, unknown function	-0.389907	0.341296	male	●
PBANKA_0829300	conserved Plasmodium protein, unknown function	-0.389445	0.486927	other
PBANKA_0803800	conserved protein, unknown function	-0.38735	0.188053	other	●
PBANKA_1215000	survival motor neuron-like protein, putative	-0.385877	0.498062	other
PBANKA_1236900	transcription initiation factor TFIID subunit 10, putative	-0.384802	0.25688	other
PBANKA_1106400	transcription factor 25, putative	-0.384382	0.174032	other
PBANKA_1239400	50S ribosomal protein L12, apicoplast, putative	-0.381989	0.0784591	other
PBANKA_1406000	conserved Plasmodium protein, unknown function	-0.381687	0.377649	other
PBANKA_0102400	conserved Plasmodium protein, unknown function	-0.381128	0.270015	other	●
PBANKA_1039400	ribosomal protein S27a, putative	-0.380659	0.271722	other	●
PBANKA_0519600	conserved protein, unknown function	-0.379448	0.261116	other
PBANKA_1221300	conserved Plasmodium protein, unknown function	-0.37885	0.39143	other
PBANKA_0941000	conserved Plasmodium protein, unknown function	-0.378651	0.560404	other
PBANKA_1331700	zinc finger protein, putative	-0.378467	0.3801	other
PBANKA_0817600	methyltransferase, putative	-0.378418	0.375778	other
PBANKA_1422700	superoxide dismutase [Fe], putative	-0.378288	0.194513	other
PBANKA_1203450	conserved Plasmodium protein, unknown function	-0.376912	0.39475	other	●
PBANKA_1364500	conserved Plasmodium protein, unknown function	-0.3766	0.194112	other
PBANKA_0401900	DNA-directed RNA polymerases I, II, and III subunit RPABC2, putative	-0.375975	0.145965	other	●	●
PBANKA_1332100	zinc finger protein, putative	-0.375157	0.0496572	other
PBANKA_0905600	translation initiation factor eIF-1A, putative	-0.374808	0.189818	other
PBANKA_1213100	prohibitin 2	-0.373601	0.115943	other	●
PBANKA_1410200	cytochrome c, putative	-0.371709	0.347962	other
PBANKA_0909300	adrenodoxin reductase, putative	-0.371566	0.0677592	other
PBANKA_0934500	protein tyrosine phosphatase	-0.371374	0.10729	other
PBANKA_1455600	queuine tRNA-ribosyltransferase, putative	-0.371043	0.0386528	other
PBANKA_1334200	RNA 3'-terminal phosphate cyclase-like protein, putative	-0.37084	0.276465	other
PBANKA_1331600	leucine-rich repeat protein	-0.370446	0.195769	male
PBANKA_1401700	SNARE protein, putative	-0.370244	0.253023	other
PBANKA_1442700	conserved protein, unknown function	-0.369773	0.305091	other
PBANKA_1005300	conserved Plasmodium protein, unknown function	-0.369602	0.0457959	other	●
PBANKA_1204300	CCR4-NOT transcription complex subunit 5, putative	-0.369115	0.176861	other	●
PBANKA_0720600	trafficking protein particle complex subunit 3, putative	-0.368848	0.471185	other
PBANKA_0201300	lysophospholipase, putative	-0.368194	0.397748	other
PBANKA_0100700	Plasmodium exported protein, unknown function	-0.368104	0.508834	other
PBANKA_0212900	conserved Plasmodium protein, unknown function	-0.367657	0.154928	other
PBANKA_0512700	conserved Plasmodium protein, unknown function	-0.36701	0.227676	other	●
PBANKA_0720800	RNA-binding protein NOB1, putative	-0.367004	0.287903	other
PBANKA_0712700	zinc finger protein, putative	-0.365142	0.433135	other
PBANKA_1404100	site-2 protease S2P	-0.364757	0.0652165	other
PBANKA_1362200	cytidine and deoxycytidylate deaminase, putative	-0.36435	0.276465	male	●
PBANKA_1225400	gamete release protein	-0.364174	0.578605	other
PBANKA_0305000	serine repeat antigen 2	-0.363697	NA	other		●
PBANKA_0611400	pantothenate kinase 2, putative	-0.363683	0.307995	other
PBANKA_0304400	merozoite surface protein 4/5	-0.363148	0.404432	other
PBANKA_0827700	replication termination factor, putative	-0.361344	0.154516	other
PBANKA_0312600	palmitoyltransferase DHHC11, putative	-0.361082	0.1218	other		●
PBANKA_0111400	conserved Plasmodium protein, unknown function	-0.361047	0.196123	other
PBANKA_1218100	oocyst capsule protein Cap380	-0.360955	0.48259	other
PBANKA_0713800	NEDD8-activating enzyme E1 catalytic subunit, putative	-0.360242	0.261314	other
PBANKA_1107600	6-cysteine protein	-0.358138	0.280495	other
PBANKA_0315600	40S ribosomal protein S30, putative	-0.358105	0.350529	other		●
PBANKA_0708400	small nuclear ribonucleoprotein G, putative	-0.356369	0.111637	other	●
PBANKA_1348200	conserved Plasmodium protein, unknown function	-0.355366	0.0935028	other
PBANKA_0623300	tryptophan-rich protein	-0.354531	0.220125	other
PBANKA_1438700	citrate/oxoglutarate carrier protein, putative	-0.354347	0.404403	other
PBANKA_1423400	conserved Plasmodium protein, unknown function	-0.351903	0.372491	other
PBANKA_0943000	conserved Plasmodium protein, unknown function	-0.351058	0.493181	male
PBANKA_1012700	conserved Plasmodium protein, unknown function	-0.350634	0.0564903	male
PBANKA_1242500	ATP-dependent RNA helicase DDX41, putative	-0.35014	0.05878	other
PBANKA_1428400	tetratricopeptide repeat protein, putative	-0.349157	0.086206	other
PBANKA_1340100	L-lactate dehydrogenase	-0.34871	0.444737	other
PBANKA_1310600	heme detoxification protein, putative	-0.348688	0.308487	other
PBANKA_0402400	IBR domain protein, putative	-0.348	0.115596	other
PBANKA_1445400	protein transport protein SEC13	-0.347785	0.431716	other
PBANKA_0924000	conserved protein, unknown function	-0.347634	0.0444194	other	●
PBANKA_1223600	YEATS domain-containing protein, putative	-0.346935	0.104492	other
PBANKA_1445900	conserved Plasmodium protein, unknown function	-0.346537	0.123177	other
PBANKA_0716900	armadillo-domain containing rhoptry protein, putative	-0.346119	0.554945	female
PBANKA_1122300	MEI2-like RNA-binding protein, putative	-0.346104	0.176445	other
PBANKA_1345100	conserved Plasmodium protein, unknown function	-0.344609	0.122605	other
PBANKA_1103700	AN1-type zinc finger protein, putative	-0.343827	0.12195	other
PBANKA_1323700	FYVE and coiled-coil domain-containing protein, putative	-0.34283	0.21493	other
PBANKA_1233100	proteasome subunit beta type-1, putative	-0.342606	0.0863861	other
PBANKA_0610600	peripheral plastid protein 1, putative	-0.342417	0.176832	other
PBANKA_0927900	CorA-like Mg2+ transporter protein, putative	-0.342038	0.139136	other
PBANKA_0922900	mitochondrial import inner membrane translocase subunit TIM44, putative	-0.340446	0.143331	other
PBANKA_1228000	1-cys peroxiredoxin, putative	-0.339155	0.285863	other
PBANKA_1338800	conserved protein, unknown function	-0.338603	0.103128	other	●
PBANKA_0311900	RING zinc finger protein, putative	-0.338292	0.469635	other
PBANKA_1022900	DNL-type zinc finger protein, putative	-0.338013	0.22785	other
PBANKA_1411200	conserved Plasmodium protein, unknown function	-0.337339	0.134684	other		●
PBANKA_1464500	ATP-dependent RNA helicase DRS1, putative	-0.337266	0.433135	other
PBANKA_0108500	mitochondrial ribosomal protein L19 precursor, putative	-0.336263	0.18616	other
PBANKA_1218200	T-complex protein 1 subunit epsilon, putative	-0.336148	0.169271	other
PBANKA_1121400	RNA methyltransferase, putative	-0.335468	0.0964919	other
PBANKA_0112200	myosin E, putative	-0.334795	0.613668	other
PBANKA_1328300	ATP-dependent zinc metalloprotease FTSH, putative	-0.334736	0.077189	other	●
PBANKA_1308600	fructose-bisphosphate aldolase 2	-0.333639	0.280259	male
PBANKA_1333400	conserved Plasmodium protein, unknown function	-0.332949	0.344598	other
PBANKA_0933400	GTPase-activating protein, putative	-0.332872	0.207781	other
PBANKA_0403700	conserved Plasmodium protein, unknown function	-0.332614	0.107679	other	●	●
PBANKA_1315900	aminomethyltransferase, putative	-0.330734	0.119247	other
PBANKA_1142900	suppressor of kinetochore protein 1, putative	-0.330686	0.274605	other
PBANKA_1243400	nucleolar preribosomal GTPase, putative	-0.329385	0.403036	other
PBANKA_1013500	large subunit GTPase 1, putative	-0.328848	0.474879	other	●
PBANKA_0707400	RNA-binding protein, putative	-0.328511	0.243113	other
PBANKA_0405400	40S ribosomal protein S12, putative	-0.327949	0.24503	other	●
PBANKA_1001700	conserved Plasmodium protein, unknown function	-0.327488	0.603914	other
PBANKA_0618100	conserved protein, unknown function	-0.325097	0.23042	other
PBANKA_1350500	parasitophorous vacuolar protein 3	-0.324826	0.168838	other		●
PBANKA_1438900	GTP cyclohydrolase 1, putative	-0.324615	0.152837	other
PBANKA_1456500	zinc finger protein, putative	-0.32457	0.513242	other
PBANKA_1231800	60S ribosomal protein L12, putative	-0.323976	0.334359	other
PBANKA_1439200	polyadenylate-binding protein 1, putative	-0.32359	0.394521	other	●
PBANKA_1207200	adenylate kinase, putative	-0.322952	0.227685	other
PBANKA_0705900	lipase maturation factor, putative	-0.321266	0.272354	other
PBANKA_0823600	pre-mRNA-splicing factor 18, putative	-0.320216	0.228213	other
PBANKA_1243100	F-actin-capping protein subunit alpha	-0.320201	0.343374	female
PBANKA_0719900	cdc2-related protein kinase 1	-0.319538	0.0908878	other
PBANKA_1132200	RWD domain-containing protein, putative	-0.318948	0.236008	other
PBANKA_1364200	60S ribosomal protein L17, putative	-0.318666	0.220307	other	●
PBANKA_1460200	conserved protein, unknown function	-0.318239	0.209647	other
PBANKA_1443900	conserved Plasmodium protein, unknown function	-0.318166	0.120852	other
PBANKA_1228700	nucleolar protein 10, putative	-0.317168	0.0826439	other
PBANKA_0524100	conserved Plasmodium protein, unknown function	-0.316713	0.433308	other
PBANKA_0921400	protein phosphatase, putative	-0.316454	0.602058	other
PBANKA_1405700	DnaJ protein, putative	-0.316217	0.374281	other
PBANKA_1451400	protein-S-isoprenylcysteine O-methyltransferase, putative	-0.313017	0.26675	other
PBANKA_1239300	conserved Plasmodium protein, unknown function	-0.312913	0.541762	other
PBANKA_0310100	conserved protein, unknown function	-0.312672	0.261097	other
PBANKA_0904600	conserved Plasmodium protein, unknown function	-0.311992	0.297294	male
PBANKA_1235300	bis(5'-nucleosyl)-tetraphosphatase [asymmetrical], putative	-0.311864	0.316118	other
PBANKA_0100600	schizont membrane associated cytoadherence protein	-0.311438	0.562229	other
PBANKA_1209900	conserved protein, unknown function	-0.311005	0.227835	other	●
PBANKA_0941200	tRNA-splicing ligase RtcB, putative	-0.310769	0.455047	other
PBANKA_1328000	serine/threonine protein phosphatase UIS2	-0.310599	0.419555	other
PBANKA_0407700	60S acidic ribosomal protein P2, putative	-0.310541	0.378896	other
PBANKA_0720400	conserved Plasmodium protein, unknown function	-0.310467	0.0602568	other
PBANKA_0406700	activator of Hsp90 ATPase, putative	-0.310137	0.318873	other
PBANKA_0213100	signal recognition particle subunit SRP9, putative	-0.308903	0.284616	other
PBANKA_0942100	metabolite/drug transporter, putative	-0.308606	0.336672	other
PBANKA_0801100	conserved Plasmodium protein, unknown function	-0.308589	0.415269	other	●
PBANKA_0809900	tRNA pseudouridine synthase, putative	-0.307793	0.131183	other
PBANKA_1430000	histone-lysine N-methyltransferase, putative	-0.306852	0.430285	other
PBANKA_1130400	proteasome subunit alpha type-4, putative	-0.306838	0.35262	other
PBANKA_0827800	HSP90 co-chaperone p23, putative	-0.306611	0.225915	other
PBANKA_1016100	peptide chain release factor 1, putative	-0.306171	0.245242	other
PBANKA_1114000	aspartate--tRNA ligase, putative	-0.306156	0.392478	other
PBANKA_0913900	alpha/beta hydrolase, putative	-0.305941	0.063322	other
PBANKA_1103000	serine/arginine-rich splicing factor 12, putative	-0.305779	0.228663	other
PBANKA_1429100	conserved Plasmodium protein, unknown function	-0.305287	0.355168	male
PBANKA_0102500	phenylalanine--tRNA ligase, putative	-0.304917	0.127467	other
PBANKA_1242900	conserved protein, unknown function	-0.304459	0.5732	other
PBANKA_1007000	chaperone protein DnaJ, putative	-0.304079	0.365429	other
PBANKA_0930100	conserved Plasmodium protein, unknown function	-0.303757	0.198334	other
PBANKA_1206500	AP-5 complex subunit sigma-1, putative	-0.303355	0.22001	other
PBANKA_0705200	ATP synthase-associated protein, putative	-0.302669	0.336958	other		●
PBANKA_1458000	translation machinery-associated protein 46, putative	-0.302554	0.396099	other
PBANKA_0405300	40S ribosomal protein S23, putative	-0.302294	0.342598	other
PBANKA_0413700	conserved Plasmodium protein, unknown function	-0.302054	0.361902	male
PBANKA_0706400	conserved Plasmodium protein, unknown function	-0.301941	0.37711	other
PBANKA_1318700	protein phosphatase PPM3	-0.30161	0.280331	male
PBANKA_0104900	RNA-binding protein, putative	-0.301503	0.133246	other
PBANKA_1021300	mitochondrial ribosomal protein L21 precursor, putative	-0.300016	0.213625	other
PBANKA_0107000	conserved Plasmodium protein, unknown function	-0.299665	0.15087	other	●	●
PBANKA_0903200	conserved Plasmodium protein, unknown function	-0.299326	0.331455	other
PBANKA_1121000	conserved Plasmodium protein, unknown function	-0.29929	0.378896	female	●
PBANKA_1354200	mitochondrial pyruvate carrier protein 1, putative	-0.296601	0.395022	female	●	●
PBANKA_0106800	conserved Plasmodium protein, unknown function	-0.296253	0.275192	other
PBANKA_0503100	conserved Plasmodium protein, unknown function	-0.292832	0.145402	other
PBANKA_1332500	pre-rRNA-processing protein PNO1, putative	-0.292353	0.291325	other
PBANKA_1240500	conserved protein, unknown function	-0.291544	0.500307	other
PBANKA_1327800	zinc finger protein, putative	-0.291264	0.320555	other	●
PBANKA_0203400	FAD-linked sulfhydryl oxidase ERV1, putative	-0.289871	0.387167	other
PBANKA_1461400	bax inhibitor 1, putative	-0.289047	0.309115	other	●
PBANKA_0212500	conserved Plasmodium protein, unknown function	-0.288673	0.287903	other
PBANKA_1430200	ER membrane protein complex subunit 6, putative	-0.288445	0.330478	other	●
PBANKA_0105000	ubiquitin-conjugating enzyme E2 PEX4, putative	-0.287901	0.465576	other
PBANKA_0104100	serine/threonine protein kinase, putative	-0.287841	0.436435	male	●
PBANKA_1451200	p25-alpha family protein, putative	-0.287737	0.363755	female
PBANKA_1408500	ATP synthase subunit O, mitochondrial, putative	-0.287535	0.21629	other	●
PBANKA_1313700	serine/threonine protein kinase, putative	-0.287084	0.222628	other	●
PBANKA_1240400	RNA methyltransferase, putative	-0.286542	0.282627	other
PBANKA_0603000	conserved Plasmodium protein, unknown function	-0.283696	0.262018	male
PBANKA_0405100	ER membrane protein complex subunit 5, putative	-0.283559	0.395022	other
PBANKA_0834800	histidine--tRNA ligase, putative	-0.282594	0.216226	other
PBANKA_0932200	peptidyl-prolyl cis-trans isomerase, putative	-0.282076	0.396462	other		●
PBANKA_1105500	mediator of RNA polymerase II transcription subunit 11, putative	-0.281919	0.31625	other
PBANKA_0405000	ATP synthase-associated protein, putative	-0.281776	0.447574	other		●
PBANKA_0809300	peptide deformylase, putative	-0.280988	0.462106	other
PBANKA_1320200	conserved Plasmodium protein, unknown function	-0.280553	0.34738	other
PBANKA_0211600	mTERF domain-containing protein, putative	-0.278978	0.141147	other
PBANKA_0712400	rRNA-processing protein FCF1, putative	-0.278583	0.36324	other
PBANKA_0608400	50S ribosomal protein L1, apicoplast, putative	-0.277798	0.349019	other
PBANKA_0311800	acyl-CoA synthetase, putative	-0.277594	0.603914	other
PBANKA_0715500	phosphoglucomutase-2	-0.277503	0.271104	other
PBANKA_0102600	centrosomal protein CEP76, putative	-0.277258	0.152328	other
PBANKA_1427500	acyl-CoA binding protein, putative	-0.27711	0.190829	other	●
PBANKA_0300900	conserved Plasmodium protein, unknown function	-0.276748	0.392478	other
PBANKA_1452800	pre-mRNA-splicing factor CWC22, putative	-0.276719	0.0933317	other	●	●
PBANKA_1440300	rRNA-processing protein, putative	-0.276249	0.579499	other
PBANKA_1329300	40S ribosomal protein S3, putative	-0.276152	0.421806	other
PBANKA_1001200	conserved Plasmodium protein, unknown function	-0.274781	0.374646	male
PBANKA_1101100	Plasmodium exported protein, unknown function	-0.274111	0.495489	other
PBANKA_1456900	translation initiation factor SUI1, putative	-0.273623	0.390346	other	●	●
PBANKA_1233900	50S ribosomal protein L14, mitochondrial, putative	-0.272557	0.3044	other
PBANKA_0619900	Obg-like ATPase 1, putative	-0.272506	0.203042	other
PBANKA_1034600	conserved Plasmodium protein, unknown function	-0.271896	0.177101	other
PBANKA_1327000	DNA-directed RNA polymerase III subunit RPC4, putative	-0.27114	0.17055	other
PBANKA_1244000	cell cycle regulator protein, putative	-0.270292	0.382814	other
PBANKA_1109400	phosphatidylinositol 4-kinase, putative	-0.270012	0.266659	other
PBANKA_0937800	essential nuclear protein 1, putative	-0.269872	0.184222	other	●
PBANKA_0414800	arginase	-0.269104	0.451279	other
PBANKA_0905800	DnaJ protein, putative	-0.268851	0.171407	other
PBANKA_1346700	60S ribosomal protein L23, putative	-0.268703	0.387167	other	●
PBANKA_1345200	conserved Plasmodium protein, unknown function	-0.268527	0.411837	other
PBANKA_0513000	inner membrane complex protein 1m, putative	-0.268264	0.456231	female	●	●
PBANKA_1123000	conserved protein, unknown function	-0.267789	0.261345	other
PBANKA_1455200	ATP-dependent RNA helicase DBP9, putative	-0.267684	0.621842	other
PBANKA_1218500	protein phosphatase inhibitor 2, putative	-0.267135	0.292373	other		●
PBANKA_1311200	conserved Plasmodium protein, unknown function	-0.266974	0.283629	other
PBANKA_0829400	conserved Plasmodium protein, unknown function	-0.266939	0.3801	other	●
PBANKA_1409400	mitochondrial ribosomal protein S15 precursor, putative	-0.266625	0.519008	other
PBANKA_1129600	TPH domain-containing protein, putative	-0.266463	0.593298	male
PBANKA_1464200	thymidylate kinase, putative	-0.266171	0.489919	other
PBANKA_1361800	conserved Plasmodium protein, unknown function	-0.265617	0.350529	female	●
PBANKA_1425350	GTPase, putative	-0.263782	0.223954	other
PBANKA_0515500	protein phosphatase inhibitor 3, putative	-0.263146	0.47732	other
PBANKA_1123400	anaphase-promoting complex subunit 11, putative	-0.262002	0.411375	male	●
PBANKA_0214600	Plasmodium exported protein, unknown function	-0.261838	0.684117	other
PBANKA_0721700	ran-specific GTPase-activating protein 1, putative	-0.261508	0.463272	other	●
PBANKA_0717900	RNA-binding protein, putative	-0.260956	0.468311	other
PBANKA_0405600	microtubule-associated protein RP/EB family, putative	-0.260756	0.365094	male	●
PBANKA_0524700	Plasmodium exported protein, unknown function	-0.259917	0.242778	other	●
PBANKA_0521100	conserved Plasmodium protein, unknown function	-0.259483	0.313559	male
PBANKA_0617600	pre-rRNA-processing protein ESF2, putative	-0.259237	0.381146	other
PBANKA_0939400	prefoldin, putative	-0.257468	0.201501	other
PBANKA_0204700	mitochondrial carrier protein, putative	-0.257374	0.389875	other
PBANKA_1447700	elongation factor G, putative	-0.255544	0.402866	other
PBANKA_1350100	conserved Plasmodium protein, unknown function	-0.254091	0.606858	other
PBANKA_0303200	DNA-directed RNA polymerase II 16 kDa subunit, putative	-0.253868	0.401211	other
PBANKA_0610500	glutathione peroxidase-like thioredoxin peroxidase	-0.253736	0.428602	other
PBANKA_0614700	conserved Plasmodium membrane protein, unknown function	-0.253407	0.371347	male
PBANKA_1451700	conserved Plasmodium protein, unknown function	-0.253376	0.279463	other	●
PBANKA_1009500	glutamate synthase [NADH], putative	-0.252879	0.33145	other		●
PBANKA_0503400	conserved Plasmodium protein, unknown function	-0.251937	0.447574	other
PBANKA_1206400	endonuclease, putative	-0.251929	0.460964	other
PBANKA_0508400	RNA-binding protein, putative	-0.251569	0.339326	other
PBANKA_0902200	protein YIPF6, putative	-0.250913	0.520155	other
PBANKA_1312700	gamete egress and sporozoite traversal protein	-0.25073	0.326648	other	●	●
PBANKA_0712800	U4/U6.U5 small nuclear ribonucleoprotein, putative	-0.250183	0.486591	other
PBANKA_1437400	diphthine--ammonia ligase, putative	-0.249726	0.290517	other
PBANKA_0705400	translation initiation factor IF-3, putative	-0.249254	0.470006	other
PBANKA_1322600	golgi apparatus membrane protein TVP23, putative	-0.249234	0.297142	other
PBANKA_0936600	conserved Plasmodium protein, unknown function	-0.249194	0.195104	other
PBANKA_1436800	protein TSSC1, putative	-0.248387	0.451213	other	●
PBANKA_0111300	conserved Plasmodium protein, unknown function	-0.247581	0.241179	other	●	●
PBANKA_0411300	conserved Plasmodium protein, unknown function	-0.247578	0.410363	male
PBANKA_1208400	ribosomal protein L43, mitochondrial, putative	-0.247484	0.379779	other
PBANKA_0824900	patatin-like phospholipase, putative	-0.247134	0.292205	other	●
PBANKA_1462100	conserved Plasmodium protein, unknown function	-0.246294	0.417336	male
PBANKA_0618400	tetratricopeptide repeat protein, putative	-0.245708	0.351232	other
PBANKA_0404200	ubiquitin-conjugating enzyme E2, putative	-0.245009	0.332872	other
PBANKA_0905700	DNA-directed RNA polymerases I and III subunit RPAC1, putative	-0.24464	0.261314	other
PBANKA_1329800	AP2 domain transcription factor AP2-SP	-0.243725	0.278287	other
PBANKA_1459900	signal recognition particle receptor subunit beta, putative	-0.242984	0.389875	other	●
PBANKA_1036700	COBW domain-containing protein 1, putative	-0.242917	0.43972	other
PBANKA_1244500	SNARE protein, putative	-0.242872	0.397748	other
PBANKA_1230500	RNA and export factor binding protein, putative	-0.241811	0.437142	other
PBANKA_1422500	heptatricopeptide repeat and RAP domain-containing protein, putative	-0.241805	0.332321	other
PBANKA_0823500	glutamine synthetase, putative	-0.241601	0.256476	other	●
PBANKA_0103900	RNA-binding protein, putative	-0.241318	0.576457	other
PBANKA_0942800	syntaxin, putative	-0.240367	0.547136	other
PBANKA_0929000	tRNA m(1)G methyltransferase, putative	-0.239473	0.619994	other
PBANKA_1415100	choline-phosphate cytidylyltransferase	-0.238815	0.238314	other
PBANKA_1226000	tRNA pseudouridine synthase, putative	-0.23871	0.580296	other
PBANKA_0622000	conserved Plasmodium protein, unknown function	-0.238704	0.465041	male
PBANKA_0820600	pyridoxal phosphate homeostasis protein, putative	-0.236781	0.638722	other
PBANKA_1234800	40S ribosomal protein S9, putative	-0.236429	0.367734	other
PBANKA_1144000	26S proteasome regulatory subunit RPN11, putative	-0.236375	0.371305	other
PBANKA_1433900	AP-2 complex subunit mu, putative	-0.235521	0.488384	other
PBANKA_0812100	phosphatidylinositol N-acetylglucosaminyltransferase, putative	-0.235268	0.372804	other
PBANKA_1461200	conserved protein, unknown function	-0.235169	0.420266	other	●	●
PBANKA_1333500	conserved Plasmodium protein, unknown function	-0.234992	0.533105	other
PBANKA_1015100	conserved Plasmodium protein, unknown function	-0.234593	0.349296	other
PBANKA_1449600	PIH1 domain-containing protein, putative	-0.234538	0.598494	other
PBANKA_0603700	conserved protein, unknown function	-0.234501	0.373884	male	●
PBANKA_0305100	serine repeat antigen 1	-0.234165	0.876378	other		●
PBANKA_0502800	tRNA wybutosine-synthesizing protein, putative	-0.234042	0.547617	other
PBANKA_1347300	SAM-dependent RNA methyltransferase, putative	-0.233002	0.398557	other
PBANKA_1022500	surface protein P113	-0.232577	0.442579	other
PBANKA_0415200	vacuolar protein sorting-associated protein 46, putative	-0.231801	0.388531	other
PBANKA_1464600	conserved Plasmodium protein, unknown function	-0.231625	0.335375	other
PBANKA_0609200	conserved Plasmodium protein, unknown function	-0.231435	0.350065	other
PBANKA_0807600	40S ribosomal protein S11, putative	-0.23133	0.442752	other		●
PBANKA_0302300	aspartate aminotransferase, putative	-0.231206	0.35122	other
PBANKA_1016200	protein kinase, putative	-0.231151	0.493626	female
PBANKA_1335500	conserved protein, unknown function	-0.23086	0.520842	other
PBANKA_1430100	geranylgeranyl transferase type-2 subunit beta, putative	-0.230799	0.373696	other
PBANKA_1358600	isocitrate dehydrogenase [NADP], mitochondrial, putative	-0.230037	0.263091	other	●
PBANKA_1345800	RNA-binding protein, putative	-0.229585	0.514768	other
PBANKA_1446900	dihydrolipoyl dehydrogenase, mitochondrial, putative	-0.22914	0.334578	other
PBANKA_1227800	conserved Plasmodium protein, unknown function	-0.229037	0.577507	other
PBANKA_1360300	DNA/RNA-binding protein Alba 4, putative	-0.227679	0.194124	other	●
PBANKA_1213500	CWC16 domain-containing protein, putative	-0.227642	0.331135	other
PBANKA_1407700	protein phosphatase PPM6	-0.226258	0.216226	other
PBANKA_0206200	conserved protein, unknown function	-0.225672	0.373696	other
PBANKA_1350000	conserved protein, unknown function	-0.224807	0.389797	other
PBANKA_1441300	heptatricopeptide repeat and RAP domain-containing protein, putative	-0.224717	0.567594	other
PBANKA_0830300	conserved protein, unknown function	-0.224064	0.534856	other
PBANKA_1201500	conserved protein, unknown function	-0.223767	0.434971	other
PBANKA_0834000	calcyclin-binding protein, putative	-0.223441	0.315913	other		●
PBANKA_0832500	PIH1 domain-containing protein, putative	-0.223005	0.394521	male
PBANKA_1115600	conserved Plasmodium protein, unknown function	-0.222942	0.354217	other
PBANKA_0918400	conserved Plasmodium protein, unknown function	-0.2229	0.525836	other
PBANKA_1409100	ras-related protein Rab-5B, putative	-0.222737	0.645486	other
PBANKA_1305000	conserved Plasmodium protein, unknown function	-0.221719	0.292373	other
PBANKA_0600600	NIMA related kinase 3, putative	-0.221096	0.561815	male	●	●
PBANKA_1103400	60S ribosomal protein L31, putative	-0.220827	0.430285	other
PBANKA_0808420	tubulin-specific chaperone, putative	-0.219729	0.471185	other
PBANKA_0209500	ATP-dependent RNA helicase, putative	-0.219651	0.475869	other
PBANKA_0930700	conserved protein, unknown function	-0.219594	0.351169	other
PBANKA_0301200	ERCC1 nucleotide excision repair protein, putative	-0.219329	0.480701	male	●
PBANKA_0703700	ATP-dependent RNA helicase DBP10, putative	-0.218923	0.384593	other
PBANKA_0703400	conserved Plasmodium protein, unknown function	-0.218801	0.455047	other
PBANKA_0602100	conserved Plasmodium protein, unknown function	-0.218533	0.328536	other
PBANKA_1340800	conserved Plasmodium protein, unknown function	-0.218338	0.485236	other
PBANKA_0835900	protein kish, putative	-0.217573	0.600743	other
PBANKA_1418400	ATP-dependent Clp protease adapter protein ClpS, putative	-0.217391	0.48434	other
PBANKA_0605200	DNA-directed RNA polymerase III subunit RPC2, putative	-0.217189	0.568533	other
PBANKA_1135700	CUGBP Elav-like family member 1, putative	-0.217159	0.547819	other	●	●
PBANKA_0806200	E3 ubiquitin-protein ligase RBX1, putative	-0.217122	0.388633	other
PBANKA_0506500	ZIP domain-containing protein	-0.216703	0.432293	other
PBANKA_1003800	V-type proton ATPase subunit B, putative	-0.21609	0.463272	other
PBANKA_1430800	thioredoxin peroxidase 2, putative	-0.215492	0.50771	other
PBANKA_1214700	conserved Plasmodium protein, unknown function	-0.215256	0.527284	other
PBANKA_1007500	actin-like protein, putative	-0.214527	0.340857	other
PBANKA_0110400	eukaryotic translation initiation factor 3 subunit L, putative	-0.21214	0.459842	other	●
PBANKA_1308700	conserved protein, unknown function	-0.21202	0.514768	other
PBANKA_1420400	negative elongation factor A, putative	-0.211815	0.422249	other
PBANKA_0606400	conserved Plasmodium protein, unknown function	-0.210958	0.516123	other
PBANKA_1111600	prefoldin subunit 6, putative	-0.210144	0.374684	other	●
PBANKA_0619700	rhoptry-associated leucine zipper-like protein 1, putative	-0.208986	0.875678	other
PBANKA_1350600	nuclear movement protein, putative	-0.208117	0.284088	other
PBANKA_1428500	glycerol-3-phosphate 1-O-acyltransferase, putative	-0.207283	0.430388	other
PBANKA_1028400	60S ribosomal protein L10, putative	-0.207203	0.256985	other
PBANKA_0937100	vacuolar protein sorting-associated protein 35, putative	-0.206891	0.565978	other	●
PBANKA_0105700	MYND-type zinc finger protein, putative	-0.206642	0.316399	other
PBANKA_0314500	40S ribosomal protein S26, putative	-0.205804	0.432293	other
PBANKA_0214300	AP-4 complex subunit beta, putative	-0.20557	0.279122	other	●
PBANKA_1437900	conserved Plasmodium protein, unknown function	-0.205191	0.283659	other		●
PBANKA_1349300	conserved Plasmodium protein, unknown function	-0.20501	0.362506	male	●
PBANKA_1133400	elongation factor 1-alpha	-0.204617	0.62441	other		●
PBANKA_1311000	conserved protein, unknown function	-0.203748	0.355278	other
PBANKA_1325900	conserved protein, unknown function	-0.203743	0.581479	other
PBANKA_0617100	60S ribosomal protein L11a, putative	-0.203604	0.290634	other
PBANKA_1244600	phosphoenolpyruvate/phosphate translocator	-0.203545	0.334359	other
PBANKA_1226300	zinc finger protein, putative	-0.203458	0.396462	other
PBANKA_1215100	Rh5 interacting protein, putative	-0.203364	0.768013	other
PBANKA_1407300	tyrosine recombinase, putative	-0.203253	0.52062	other
PBANKA_1133300	elongation factor 1-alpha	-0.202994	0.5855	other		●
PBANKA_1405500	exosome complex component RRP40, putative	-0.202599	0.422249	other
PBANKA_1305900	ADP-ribosylation factor, putative	-0.201602	0.518636	male
PBANKA_1408700	conserved Plasmodium protein, unknown function	-0.20076	0.645746	male
PBANKA_0621800	ubiquinone biosynthesis O-methyltransferase, putative	-0.20073	0.611348	other
PBANKA_0610200	DNA replication licensing factor MCM5, putative	-0.200472	0.548784	male	●
PBANKA_0413600	zinc finger protein, putative	-0.199622	0.654762	other
PBANKA_0306300	exosome complex component MTR3, putative	-0.199501	0.541528	other
PBANKA_1116500	mitochondrial import receptor subunit TOM40, putative	-0.199287	0.40425	other	●
PBANKA_0808800	prefoldin-like protein, putative	-0.19927	0.48498	other
PBANKA_1217500	conserved protein, unknown function	-0.198915	0.514733	other	●
PBANKA_1326400	glyceraldehyde-3-phosphate dehydrogenase	-0.19874	0.629163	other
PBANKA_0206300	centrin-1, putative	-0.198617	0.363267	male		●
PBANKA_1458600	50S ribosomal protein L3, mitochondrial, putative	-0.198591	0.546939	other
PBANKA_1421800	ATP synthase subunit epsilon, mitochondrial, putative	-0.198165	0.497526	other
PBANKA_1433700	conserved Plasmodium protein, unknown function	-0.198127	0.373799	female		●
PBANKA_0617500	exosome complex component CSL4, putative	-0.197985	0.503438	other
PBANKA_0906600	coproporphyrinogen-III oxidase, putative	-0.197851	0.311208	other	●	●
PBANKA_0911600	mitochondrial ribosomal protein S9 precursor, putative	-0.197499	0.556546	other		●
PBANKA_1434900	raf kinase inhibitor, putative	-0.197055	0.544797	other	●
PBANKA_0613500	conserved Plasmodium protein, unknown function	-0.196796	0.424602	other
PBANKA_0616500	conserved protein, unknown function	-0.196666	0.51266	other
PBANKA_1453600	mitochondrial ribosomal protein L23 precursor, putative	-0.196625	0.651423	other
PBANKA_1307700	pre-mRNA-splicing factor CWC24, putative	-0.195822	0.445529	other
PBANKA_0619600	protein pelota homolog, putative	-0.195772	0.643142	other
PBANKA_0919400	conserved protein, unknown function	-0.193434	0.353273	other
PBANKA_1019500	60S ribosomal protein L5, putative	-0.193131	0.328765	other	●
PBANKA_0501400	rhoptry neck protein 12	-0.192634	0.896231	other
PBANKA_0814400	conserved Plasmodium protein, unknown function	-0.191917	0.599612	other
PBANKA_0828600	cytochrome c oxidase subunit 5B, putative	-0.191746	0.493037	other
PBANKA_1126100	mitochondrial import inner membrane translocase subunit TIM22, putative	-0.191464	0.508648	other
PBANKA_1313300	conserved protein, unknown function	-0.191359	0.439313	other	●
PBANKA_0815200	phospholipid or glycerol acyltransferase, putative	-0.190797	0.414966	other
PBANKA_1217900	conserved protein, unknown function	-0.19021	0.547617	other	●
PBANKA_0522000	conserved Plasmodium protein, unknown function	-0.189457	0.429395	other
PBANKA_1011300	signal peptidase complex subunit SPC1, putative	-0.188571	0.425457	other
PBANKA_1310900	conserved Plasmodium protein, unknown function	-0.187854	0.507866	other
PBANKA_0306500	conserved protein, unknown function	-0.187689	0.526169	other
PBANKA_1039700	cytochrome c oxidase subunit ApiCOX19, putative	-0.187455	0.518128	other	●	●
PBANKA_0501100	early transcribed membrane protein	-0.186996	0.307311	other
PBANKA_1408200	vacuolar protein sorting-associated protein 18, putative	-0.186424	0.600215	other
PBANKA_1454900	conserved Plasmodium protein, unknown function	-0.186421	0.403036	other
PBANKA_1245000	XAP-5 DNA binding protein, putative	-0.18587	0.414719	other
PBANKA_1105900	conserved protein, unknown function	-0.185604	0.382814	other
PBANKA_0808600	conserved Plasmodium protein, unknown function	-0.185315	0.395884	other
PBANKA_1105600	conserved Plasmodium protein, unknown function	-0.185293	0.65931	other
PBANKA_0808500	conserved Plasmodium protein, unknown function	-0.184949	0.700286	other
PBANKA_1017700	cytochrome b-c1 complex subunit 6, putative	-0.184679	0.445529	other
PBANKA_1025800	prefoldin subunit 2, putative	-0.184453	0.643372	other
PBANKA_1221200	60S ribosomal protein L34, putative	-0.183442	0.619994	other
PBANKA_0313300	MtN3-like protein	-0.183172	0.618941	other	●	●
PBANKA_0828400	RNA-binding protein, putative	-0.182396	0.362425	other	●
PBANKA_1010000	mitochondrial acidic protein MAM33, putative	-0.182231	0.447762	other
PBANKA_1036400	ribosome biogenesis protein BOP1, putative	-0.182158	0.522246	other
PBANKA_0515200	MORN repeat-containing protein 1, putative	-0.181322	0.628749	other
PBANKA_0616100	prefoldin subunit 3, putative	-0.180588	0.461451	other
PBANKA_0941400	centrin-4	-0.180071	0.615436	male
PBANKA_0826800	protein kinase, putative	-0.179916	0.541528	other
PBANKA_1452300	conserved protein, unknown function	-0.179843	0.557957	other
PBANKA_1421300	phosphoglycolate phosphatase	-0.179467	0.398404	other	●
PBANKA_1004800	peptidyl-tRNA hydrolase 2, putative	-0.179325	0.548342	other
PBANKA_0314400	E2F-associated phosphoprotein, putative	-0.179264	0.429219	other
PBANKA_0524200	early transcribed membrane protein	-0.178759	0.592388	other
PBANKA_1209000	eukaryotic translation initiation factor 2 subunit beta, putative	-0.177384	0.525698	other
PBANKA_1335800	protein disulfide-isomerase, putative	-0.177346	0.457536	other
PBANKA_0927400	heat shock factor-binding protein 1, putative	-0.177022	0.514442	male
PBANKA_0508900	conserved protein, unknown function	-0.176904	0.445529	other		●
PBANKA_0613400	30S ribosomal protein S12, mitochondrial, putative	-0.176763	0.544371	other
PBANKA_0414100	inorganic pyrophosphatase, putative	-0.176684	0.455339	other	●
PBANKA_0919100	parasitophorous vacuolar protein 1	-0.176513	0.380469	other
PBANKA_1209100	dolichyl-phosphate-mannose--protein mannosyltransferase, putative	-0.176158	0.58618	other
PBANKA_1431050	10 kDa chaperonin, putative	-0.175949	0.59298	other		●
PBANKA_0312300	conserved Plasmodium protein, unknown function	-0.175937	0.621456	other
PBANKA_0524800	early transcribed membrane protein	-0.174172	0.681973	other
PBANKA_1120100	conserved Plasmodium protein, unknown function	-0.173349	0.580296	female	●
PBANKA_1020200	peptidyl-prolyl cis-trans isomerase, putative	-0.172697	0.544296	other
PBANKA_0936400	conserved protein, unknown function	-0.172434	0.507449	other
PBANKA_1039000	conserved Plasmodium protein, unknown function	-0.172217	0.569434	male
PBANKA_0804800	mediator of RNA polymerase II transcription subunit 10, putative	-0.171986	0.616238	other
PBANKA_0310900	T-complex protein 1 subunit theta, putative	-0.171733	0.431508	other	●
PBANKA_0505500	apicoplast integral membrane protein, putative	-0.170802	0.567594	male
PBANKA_1221100	conserved protein, unknown function	-0.170111	0.651826	other
PBANKA_1302500	conserved protein, unknown function	-0.169984	0.598897	other
PBANKA_0810400	GDP-fucose protein O-fucosyltransferase 2, putative	-0.169078	0.605172	other
PBANKA_1012400	RNA methyltransferase, putative	-0.168645	0.600723	male
PBANKA_1105800	TATA-box binding protein, putative	-0.168596	0.493181	other
PBANKA_1214200	ribonucleoside-diphosphate reductase small chain, putative	-0.167478	0.392478	other	●	●
PBANKA_1348400	histone H3-like centromeric protein CSE4, putative	-0.167405	0.490333	other
PBANKA_0619100	40S ribosomal protein S5, putative	-0.165944	0.578529	other
PBANKA_0909700	VPS9 domain-containing protein, putative	-0.165934	0.510067	other
PBANKA_1331800	derlin-1, putative	-0.165623	0.516123	other	●	●
PBANKA_1137600	Fe-S assembly protein IscX, putative	-0.164923	0.513347	other
PBANKA_0934200	ubiquitin domain-containing protein DSK2, putative	-0.164663	0.513493	other
PBANKA_1343100	conserved Plasmodium protein, unknown function	-0.164633	0.63999	male
PBANKA_1312300	SNARE protein, putative	-0.164269	0.451903	other	●
PBANKA_0202300	UMP-CMP kinase, putative	-0.164182	0.46956	other
PBANKA_0403900	conserved protein, unknown function	-0.164017	0.605172	other		●
PBANKA_1362700	conserved Plasmodium protein, unknown function	-0.163914	0.554894	male
PBANKA_0912900	conserved Plasmodium protein, unknown function	-0.163467	0.565543	other
PBANKA_1105200	conserved protein, unknown function	-0.162703	0.59635	other	●
PBANKA_1119800	conserved Plasmodium protein, unknown function	-0.162023	0.677412	male
PBANKA_0714400	EF-hand calcium-binding domain-containing protein, putative	-0.161977	0.485236	other
PBANKA_1203400	U3 small nucleolar RNA-associated protein 25, putative	-0.161557	0.520257	other
PBANKA_1035100	rRNA 2'-O-methyltransferase fibrillarin, putative	-0.161376	0.628229	other
PBANKA_1314100	zinc finger protein, putative	-0.159439	0.40864	other
PBANKA_0814200	elongation factor 1-beta, putative	-0.15943	0.645746	other
PBANKA_0920800	CRAL/TRIO domain-containing protein, putative	-0.159198	0.620014	other
PBANKA_1232900	protein AMR2, putative	-0.158852	0.444211	other
PBANKA_0418400	conserved protein, unknown function	-0.158454	0.638722	other
PBANKA_1220300	prodrug activation and resistance esterase, putative	-0.15691	0.414565	other	●
PBANKA_0103400	glyoxalase I-like protein GILP, putative	-0.156821	0.564192	other
PBANKA_0815300	met-10+ like protein, putative	-0.156623	0.513734	other
PBANKA_1014700	conserved protein, unknown function	-0.156522	0.662435	other
PBANKA_1303300	cytochrome b-c1 complex subunit Rieske, putative	-0.156202	0.601633	other
PBANKA_0309800	arginyl-tRNA--protein transferase, putative	-0.156141	0.593971	other
PBANKA_0600900	conserved protein, unknown function	-0.155273	0.554894	male
PBANKA_1315700	rhoptry neck protein 2	-0.154431	0.77126	other
PBANKA_1333000	conserved Plasmodium protein, unknown function	-0.154094	0.600743	other
PBANKA_1024300	ATP-dependent RNA helicase DBP4, putative	-0.153758	0.50461	other
PBANKA_1336100	dihydroorotase, putative	-0.152983	0.620692	other
PBANKA_1408900	conserved Plasmodium protein, unknown function	-0.152668	0.779283	other
PBANKA_0607100	mitochondrial import inner membrane translocase subunit TIM10, putative	-0.152255	0.651114	other	●
PBANKA_1101500	anaphase-promoting complex subunit 3	-0.151238	0.765404	other
PBANKA_1360100	nucleoside transporter 1	-0.149606	0.733189	other
PBANKA_1135500	high mobility group protein B4, putative	-0.148316	0.489283	male
PBANKA_1123700	conserved Plasmodium protein, unknown function	-0.148182	0.599612	male
PBANKA_1025500	NOT family protein, putative	-0.147909	0.663877	other
PBANKA_1301000	conserved protein, unknown function	-0.147565	0.510067	other
PBANKA_1409500	protein ISD11, putative	-0.14645	0.681477	other
PBANKA_1203900	peptidase, putative	-0.145623	0.612302	other
PBANKA_0938900	IWS1-like protein, putative	-0.145245	0.427252	other
PBANKA_1433200	anaphase-promoting complex subunit 10, putative	-0.145164	0.598494	other
PBANKA_1301400	proteasome subunit alpha type-1, putative	-0.145156	0.598494	other
PBANKA_0623200	lysophospholipase, putative	-0.144499	0.664108	other
PBANKA_1341600	translation initiation factor eIF-2B subunit gamma, putative	-0.144316	0.552275	other
PBANKA_1225700	GTPase-activating protein, putative	-0.144286	0.479651	other	●
PBANKA_0925000	RING zinc finger protein, putative	-0.144169	0.55699	other	●	●
PBANKA_0825000	conserved Plasmodium protein, unknown function	-0.144129	0.668042	other
PBANKA_0719600	memo-like protein	-0.143608	0.516123	other
PBANKA_1309000	ATP-dependent RNA helicase MAK5, putative	-0.143293	0.761634	other
PBANKA_1314500	conserved protein, unknown function	-0.143172	0.660878	other
PBANKA_1410000	26S protease regulatory subunit 7, putative	-0.142934	0.656708	other
PBANKA_1140800	conserved Plasmodium protein, unknown function	-0.142897	0.795256	other
PBANKA_0401000	pre-mRNA-splicing factor PRP46, putative	-0.142818	0.47069	other
PBANKA_1332800	acetyl-CoA carboxylase	-0.142518	0.726676	female
PBANKA_1216900	ATP-dependent RNA helicase DDX42, putative	-0.141671	0.598494	other
PBANKA_1313600	conserved protein, unknown function	-0.141536	0.810743	other
PBANKA_1405400	U1 small nuclear ribonucleoprotein A, putative	-0.14144	0.673223	other
PBANKA_0703900	receptor for activated c kinase, putative	-0.141352	0.658735	other	●
PBANKA_0922400	XTBD domain-containing protein, putative	-0.141183	0.634065	other
PBANKA_1223700	conserved protein, unknown function	-0.14073	0.700286	other
PBANKA_1406100	DNA-directed RNA polymerase subunit alpha, putative	-0.140141	0.589139	other
PBANKA_0522600	erythrocyte membrane-associated antigen, putative	-0.139899	0.659271	other	●
PBANKA_0718900	conserved Plasmodium protein, unknown function	-0.139816	0.731945	other	●
PBANKA_1340700	mitochondrial fission 1 protein, putative	-0.139246	0.645486	other
PBANKA_1320100	conserved Plasmodium protein, unknown function	-0.139211	0.772554	other	●
PBANKA_0710700	RNA-binding protein, putative	-0.138886	0.577118	other
PBANKA_1424900	ubiquitin-conjugating enzyme E2, putative	-0.138629	0.53975	other
PBANKA_1019400	60S ribosomal protein L7-3, putative	-0.138457	0.657305	other	●
PBANKA_1040000	conserved protein, unknown function	-0.138269	0.641966	male
PBANKA_1140600	DNA-directed RNA polymerases I, II, and III subunit RPABC1, putative	-0.137897	0.608175	other
PBANKA_1450300	ATP synthase subunit beta, mitochondrial	-0.137732	0.538124	other	●
PBANKA_1242600	proteasome maturation factor UMP1, putative	-0.137616	0.605469	other
PBANKA_1340300	phosphoribosylpyrophosphate synthetase, putative	-0.137213	0.565047	other
PBANKA_1438100	nucleus export protein BRR6, putative	-0.136661	0.505161	other
PBANKA_1222000	histone deacetylase complex subunit SAP18, putative	-0.136517	0.621456	other
PBANKA_0614100	transcription initiation factor IIA subunit 1, putative	-0.136438	0.802867	other	●
PBANKA_1120700	nascent polypeptide-associated complex subunit alpha, putative	-0.136286	0.622605	other
PBANKA_0922800	small nuclear ribonucleoprotein Sm D1, putative	-0.136252	0.615032	other
PBANKA_0601000	ATP-dependent DNA/RNA helicase PSH2, putative	-0.135769	0.577131	other
PBANKA_0211300	cysteine desulfurase, putative	-0.135593	0.541762	other	●	●
PBANKA_1426900	ATP-dependent RNA helicase DBP1, putative	-0.135481	0.696158	other
PBANKA_1307200	U6 snRNA-associated Sm-like protein LSm5, putative	-0.133964	0.700017	other
PBANKA_1007300	peptide chain release factor 2, putative	-0.132709	0.661104	other
PBANKA_1310000	conserved Plasmodium protein, unknown function	-0.132361	0.645486	other
PBANKA_1363500	N6-adenine-specific methylase, putative	-0.132173	0.629278	other
PBANKA_1023700	conserved Plasmodium protein, unknown function	-0.131637	0.645982	other
PBANKA_1405300	RED-like protein, putative	-0.131591	0.657675	other
PBANKA_1020900	ERAD-associated E3 ubiquitin-protein ligase HRD1, putative	-0.13139	0.622605	other	●
PBANKA_0932000	rhoptry neck protein 4	-0.12949	0.718576	other
PBANKA_0307300	50S ribosomal protein L33, putative	-0.129227	0.576457	male
PBANKA_1440200	conserved protein, unknown function	-0.129103	0.696306	other
PBANKA_0102200	trophozoite exported protein 1, putative	-0.128919	0.593322	other
PBANKA_1215400	conserved Plasmodium protein, unknown function	-0.128625	0.691809	other
PBANKA_0407900	YTH domain-containing protein, putative	-0.128436	0.733229	other
PBANKA_1238200	DnaJ protein, putative	-0.1282	0.557958	other
PBANKA_0941300	translocon component PTEX88	-0.128058	0.61407	male	●
PBANKA_0511200	U3 small nucleolar ribonucleoprotein protein MPP10, putative	-0.127876	0.634545	other
PBANKA_1428800	succinate dehydrogenase [ubiquinone] iron-sulfur subunit, mitochondrial, putative	-0.127769	0.580623	other
PBANKA_0705500	ankyrin-repeat protein, putative	-0.1276	0.691173	male
PBANKA_1219400	protein SCO1, putative	-0.127541	0.715088	other
PBANKA_1121300	conserved protein, unknown function	-0.126589	0.723901	other
PBANKA_0832800	conserved Plasmodium protein, unknown function	-0.126207	0.831749	other
PBANKA_1205700	conserved Plasmodium protein, unknown function	-0.126036	0.746156	other
PBANKA_1239500	mitochondrial import receptor subunit TOM22, putative	-0.125872	0.658759	other
PBANKA_1124600	conserved protein, unknown function	-0.125616	0.677558	other
PBANKA_1219500	chloroquine resistance transporter, putative	-0.125247	0.605105	other
PBANKA_1017500	lipase, putative	-0.125089	0.690154	other
PBANKA_0207000	calcium-transporting ATPase, putative	-0.124257	0.507541	other
PBANKA_0942600	conserved Plasmodium protein, unknown function	-0.123914	0.644429	male
PBANKA_1125800	conserved Plasmodium protein, unknown function	-0.122931	0.696158	male
PBANKA_1338400	V-type proton ATPase subunit G, putative	-0.122835	0.656279	other
PBANKA_1244300	RING zinc finger protein, putative	-0.122295	0.679795	other		●
PBANKA_0906200	ATP synthase-associated protein, putative	-0.121952	0.572034	other
PBANKA_0522500	transmembrane emp24 domain-containing protein, putative	-0.121939	0.610519	other
PBANKA_0835000	conserved protein, unknown function	-0.121264	0.74259	other
PBANKA_1203500	conserved Plasmodium protein, unknown function	-0.121234	0.721123	male
PBANKA_1354000	RNA lariat debranching enzyme, putative	-0.121032	0.821155	other	●
PBANKA_1445300	sun-family protein, putative	-0.120803	0.626198	other
PBANKA_0825400	conserved Plasmodium protein, unknown function	-0.119625	0.716718	other	●
PBANKA_1026700	conserved Plasmodium protein, unknown function	-0.119378	0.726727	male
PBANKA_1016900	conserved Plasmodium protein, unknown function	-0.119114	0.684117	other
PBANKA_1137500	actin-depolymerizing factor 2	-0.118892	0.706142	male	●
PBANKA_0303900	pantothenate transporter	-0.118863	0.652796	other
PBANKA_1130200	ER lumen protein retaining receptor, putative	-0.118133	0.662356	other
PBANKA_1323500	rhoptry protein, putative	-0.117863	0.734445	other
PBANKA_1313500	conserved protein, unknown function	-0.116558	0.613418	other
PBANKA_0517800	Sec1 family protein, putative	-0.116523	0.57088	other
PBANKA_0919300	spermidine synthase, putative	-0.116025	0.672771	other
PBANKA_1321200	vacuolar protein sorting-associated protein 4, putative	-0.115868	0.690154	other
PBANKA_1405600	U3 small nucleolar RNA-associated protein 6, putative	-0.115597	0.573876	other
PBANKA_1406300	FHA domain-containing protein, putative	-0.115535	0.787353	other
PBANKA_0807800	DNA replication complex GINS protein, putative	-0.114332	0.718599	other
PBANKA_0520600	enhancer of rudimentary homolog, putative	-0.114108	0.71784	other
PBANKA_1036600	ribonucleoside-diphosphate reductase small chain, putative	-0.114029	0.59298	other	●	●
PBANKA_0904100	ras-related protein Rab-6	-0.113853	0.80833	other		●
PBANKA_1241000	ADP-ribosylation factor GTPase-activating protein, putative	-0.113683	0.644719	other
PBANKA_1108900	conserved Plasmodium protein, unknown function	-0.113616	0.815395	other
PBANKA_0504500	cytoplasmic dynein intermediate chain, putative	-0.113337	0.593322	other	●
PBANKA_0829900	conserved protein, unknown function	-0.113301	0.732269	other
PBANKA_1316400	U1 snRNP-associated protein, putative	-0.112457	0.641152	other
PBANKA_1411400	ubiquitin-like protein nedd8 homologue, putative	-0.110912	0.696306	other
PBANKA_1035300	radical SAM protein, putative	-0.110693	0.762902	other
PBANKA_1119300	ATP synthase-associated protein, putative	-0.109979	0.723945	other
PBANKA_1033100	conserved protein, unknown function	-0.109728	0.785896	other
PBANKA_0207100	EF hand domain-containing protein, putative	-0.109497	0.743925	male
PBANKA_0802600	peptide chain release factor 2, putative	-0.109004	0.776421	other
PBANKA_0927000	tyrosine kinase-like protein, putative	-0.108932	0.821363	other		●
PBANKA_1027800	ATP-dependent protease, putative	-0.108849	0.728863	other
PBANKA_1413200	pinin/SDK/MemA domain-containing protein, putative	-0.106326	0.745186	other
PBANKA_0108800	histone H3, putative	-0.106061	0.823392	other	●	●
PBANKA_1435100	ribulose-phosphate 3-epimerase, putative	-0.105448	0.638396	other
PBANKA_1322700	ATP-dependent RNA helicase DBP5, putative	-0.104687	0.687858	other
PBANKA_1132900	regulator of chromosome condensation, putative	-0.104383	0.679795	other
PBANKA_1012200	protein-L-isoaspartate(D-aspartate) O-methyltransferase, putative	-0.103668	0.733503	other
PBANKA_1215600	40S ribosomal protein S3A, putative	-0.102932	0.706783	other	●	●
PBANKA_0107200	conserved Plasmodium protein, unknown function	-0.102843	0.823992	male
PBANKA_0307500	conserved protein, unknown function	-0.10278	0.877407	other
PBANKA_1337000	conserved Plasmodium protein, unknown function	-0.102725	0.739011	other
PBANKA_1420300	conserved Plasmodium protein, unknown function	-0.102394	0.702777	other
PBANKA_1447200	CG2-related protein, putative	-0.101755	0.692502	other	●
PBANKA_0407800	SECIS-binding protein 2, putative	-0.101545	0.694416	other
PBANKA_0508300	conserved Plasmodium protein, unknown function	-0.100591	0.720643	female
PBANKA_1445600	serine/threonine protein kinase RIO1, putative	-0.100169	0.792165	other
PBANKA_0612500	mediator of RNA polymerase II transcription subunit 8, putative	-0.0994729	0.879785	other
PBANKA_1103900	conserved Plasmodium protein, unknown function	-0.0979843	0.782498	other
PBANKA_0935800	peptidyl-prolyl cis-trans isomerase, putative	-0.0979567	0.643142	other
PBANKA_1332300	conserved Plasmodium protein, unknown function	-0.0977924	0.767244	other
PBANKA_0911500	apical exonemal protein, putative	-0.0964885	0.721614	other	●
PBANKA_1228500	sentrin-specific protease 2, putative	-0.0961431	0.811043	other
PBANKA_0618500	conserved Plasmodium protein, unknown function	-0.096127	0.807036	other	●
PBANKA_1355800	DNA-directed RNA polymerases I, II, and III subunit RPABC4, putative	-0.0960921	0.822214	other
PBANKA_1447500	conserved Plasmodium protein, unknown function	-0.0956258	0.819325	other
PBANKA_1304300	zinc finger protein, putative	-0.0954784	0.743318	other
PBANKA_1416200	conserved Plasmodium protein, unknown function	-0.0953488	0.847803	other
PBANKA_0212300	actin-like protein, putative	-0.0952854	0.733503	other
PBANKA_1447100	CWC16 domain-containing protein, putative	-0.0951307	0.686673	other
PBANKA_1010100	mitochondrial import inner membrane translocase subunit TIM17, putative	-0.0947699	0.802867	other
PBANKA_1429300	integral membrane protein GPR180, putative	-0.0944227	0.773957	other	●
PBANKA_1423300	DNA/RNA-binding protein Alba 1, putative	-0.0944096	0.683008	other
PBANKA_0704300	SPRY domain, putative	-0.094279	0.676608	other
PBANKA_1036300	RNA-binding protein, putative	-0.0938135	0.737152	other
PBANKA_1406400	tripartite motif protein, putative	-0.0937622	0.693454	other	●
PBANKA_0834100	conserved Plasmodium protein, unknown function	-0.0933473	0.853066	other		●
PBANKA_1227600	adenylyl cyclase beta, putative	-0.0928222	0.773957	other
PBANKA_0111000	6-cysteine protein P12, putative	-0.0927802	0.94315	other
PBANKA_0716000	structural maintenance of chromosomes protein 3, putative	-0.0920323	0.765404	other	●
PBANKA_1225800	peptidyl-prolyl cis-trans isomerase, putative	-0.0913852	0.737152	other
PBANKA_0408300	phd finger protein, putative	-0.0911284	0.831749	other	●
PBANKA_1308500	shikimate dehydrogenase, putative	-0.0910005	0.792374	other
PBANKA_1221800	conserved Plasmodium protein, unknown function	-0.0907917	0.820473	other
PBANKA_0933500	rhomboid protease ROM1	-0.0904163	0.796493	other
PBANKA_1460500	serine/threonine protein kinase, putative	-0.0902358	0.838128	other	●	●
PBANKA_1334300	exported protein 2	-0.089927	0.867123	other
PBANKA_0938800	conserved Plasmodium protein, unknown function	-0.0897947	0.690154	other
PBANKA_1145900	membrane associated histidine-rich protein 1b	-0.0897702	0.867269	other
PBANKA_1459700	pre-mRNA-splicing factor CWC26, putative	-0.089448	0.779943	other
PBANKA_0106400	GTP-binding protein, putative	-0.0886692	0.800413	other
PBANKA_0718800	small GTP-binding protein sar1, putative	-0.0884946	0.781099	other	●
PBANKA_1116900	conserved Plasmodium protein, unknown function	-0.0883913	0.83142	other
PBANKA_1320900	thioredoxin 1, putative	-0.0878095	0.711442	other
PBANKA_0618800	ATP-dependent RNA helicase DBP7, putative	-0.0877067	0.802867	other
PBANKA_1351900	60S ribosomal protein L6, putative	-0.0871768	0.706591	other	●
PBANKA_0702100	folate transporter 1, putative	-0.086279	0.690154	other
PBANKA_0707500	RWD domain-containing protein, putative	-0.0861486	0.825661	other
PBANKA_0512800	merozoite TRAP-like protein	-0.0860363	0.80923	male
PBANKA_1420000	GPCR-like receptor SR25, putative	-0.0850091	0.793656	other
PBANKA_0708800	ribosomal protein L4, mitochondrial, putative	-0.0845019	0.743925	other
PBANKA_1350700	tryptophan--tRNA ligase, putative	-0.0843274	0.718856	other	●
PBANKA_0907500	conserved Plasmodium protein, unknown function	-0.084252	0.762138	male
PBANKA_1325700	thioredoxin-like protein	-0.0838923	0.823392	male
PBANKA_1017400	selenoprotein, putative	-0.0833943	0.808803	other
PBANKA_1332600	conserved Plasmodium protein, unknown function	-0.08309	0.845267	other
PBANKA_1425900	conserved protein, unknown function	-0.082853	0.883078	other		●
PBANKA_1438600	vacuolar iron transporter	-0.0817944	0.815395	other
PBANKA_0209700	zinc-carboxypeptidase, putative	-0.080864	0.819842	female
PBANKA_1006800	protein SOF1, putative	-0.0800481	0.845917	other
PBANKA_0804400	conserved Plasmodium protein, unknown function	-0.0800399	0.766916	male
PBANKA_0523400	conserved Plasmodium protein, unknown function	-0.0797233	0.766715	other	●
PBANKA_1008100	ribosome biogenesis GTPase A, putative	-0.0795084	0.792042	other
PBANKA_0813600	conserved Plasmodium protein, unknown function	-0.0794189	0.824867	male
PBANKA_0921600	RNA-binding protein, putative	-0.0792667	0.688551	other
PBANKA_1308800	prolyl hydroxylase-like protein, putative	-0.0784545	0.766443	other
PBANKA_0602900	conserved Plasmodium protein, unknown function	-0.0783442	0.810743	male	●
PBANKA_0806500	triosephosphate isomerase, putative	-0.0779369	0.832929	other
PBANKA_0315200	small nuclear ribonucleoprotein Sm D2, putative	-0.0774408	0.831631	other
PBANKA_0704600	conserved Plasmodium protein, unknown function	-0.0773229	0.867123	other
PBANKA_0713600	conserved protein, unknown function	-0.0771577	0.855547	other
PBANKA_0831900	nucleolar protein Nop52, putative	-0.0769964	0.859657	other
PBANKA_1131100	adenylosuccinate synthetase, putative	-0.0768536	0.763393	other
PBANKA_1345600	elongation factor Tu, putative	-0.0767497	0.735177	other	●	●
PBANKA_0212400	conserved protein, unknown function	-0.0763866	0.785548	other
PBANKA_0606800	acyl carrier protein, mitochondrial, putative	-0.0759632	0.773957	other
PBANKA_1352900	mitochondrial ribosomal protein L49 precursor, putative	-0.0759371	0.842349	other
PBANKA_0513900	conserved Plasmodium protein, unknown function	-0.0756973	0.843662	other
PBANKA_1227100	U3 small nucleolar RNA-associated protein 14, putative	-0.0756184	0.792673	other	●
PBANKA_0508500	ATP synthase-associated protein, putative	-0.0755605	0.800553	other
PBANKA_0813000	inhibitor of cysteine proteases	-0.0755019	0.770514	other		●
PBANKA_1103800	ATP-dependent RNA helicase DDX27, putative	-0.0747823	0.832951	other
PBANKA_1450100	mRNA methyltransferase, putative	-0.0744525	0.766715	other
PBANKA_0917700	methyltransferase, putative	-0.0738577	0.852591	other
PBANKA_1026900	ribosomal RNA small subunit methyltransferase A1, putative	-0.0734755	0.827062	other	●	●
PBANKA_1451600	SUMO-activating enzyme subunit 2, putative	-0.0733712	0.820473	other
PBANKA_0501700	phosphomannomutase, putative	-0.0732995	0.825661	female
PBANKA_0909200	conserved Plasmodium protein, unknown function	-0.0732558	0.814619	other	●
PBANKA_1447800	conserved protein, unknown function	-0.0731688	0.854903	other
PBANKA_0940600	exonuclease, putative	-0.0727363	0.765404	other	●
PBANKA_1462800	ribosomal RNA small subunit methyltransferase A2, putative	-0.0725706	0.801025	other
PBANKA_0412800	eukaryotic translation initiation factor 4E, putative	-0.0724588	0.765404	other
PBANKA_1117700	malate dehydrogenase, putative	-0.0721604	0.790809	other	●	●
PBANKA_0914000	conserved protein, unknown function	-0.0713949	0.842349	other
PBANKA_0832600	proteasome subunit beta type-6, putative	-0.0712518	0.750931	other	●
PBANKA_1133600	dynein light chain, putative	-0.0711741	0.832951	male
PBANKA_1332000	splicing factor U2AF large subunit, putative	-0.0711273	0.815395	other
PBANKA_0707800	U5 small nuclear ribonucleoprotein 40 kDa protein, putative	-0.0710045	0.871215	other
PBANKA_1130500	proteasome subunit alpha type-7, putative	-0.0704561	0.827062	other
PBANKA_0501600	golgi re-assembly stacking protein, putative	-0.0704212	0.906277	other
PBANKA_1001900	conserved Plasmodium protein, unknown function	-0.0703716	0.855395	other
PBANKA_1432000	signal recognition particle subunit SRP19, putative	-0.0700951	0.839308	other
PBANKA_1022200	DIX domain-containing protein, putative	-0.0699711	0.781099	other
PBANKA_0416900	prefoldin subunit 4, putative	-0.0691383	0.845267	other
PBANKA_0610000	mitochondrial ribosomal protein S18 precursor, putative	-0.0670329	0.852931	other
PBANKA_1429000	mediator of RNA polymerase II transcription subunit 18, putative	-0.0660968	0.850244	other		●
PBANKA_0922600	kelch domain-containing protein, putative	-0.0659839	0.892806	other
PBANKA_1238900	conserved Plasmodium protein, unknown function	-0.0657904	0.86416	other	●
PBANKA_0933900	glyoxalase I, putative	-0.0655215	0.841621	other
PBANKA_0621900	mitochondrial import inner membrane translocase subunit TIM14, putative	-0.0644357	0.836795	other
PBANKA_1221500	50S ribosomal protein L1, mitochondrial, putative	-0.063838	0.823938	other
PBANKA_1034900	pre-mRNA-splicing factor 38B, putative	-0.0633098	0.881208	other
PBANKA_0622800	conserved protein, unknown function	-0.0629222	0.867769	other	●	●
PBANKA_1142400	nucleoside diphosphate kinase b, putative	-0.0627302	0.834363	other	●
PBANKA_0414400	formate-nitrite transporter, putative	-0.0625283	0.896231	other
PBANKA_0716700	GTP-binding protein, putative	-0.0624247	0.849975	other	●
PBANKA_1363000	small nuclear ribonucleoprotein E, putative	-0.0621106	0.851005	other
PBANKA_1417600	ubiquitin carboxyl-terminal hydrolase MINDY, putative	-0.0616248	0.85526	other
PBANKA_0513600	adenosine deaminase, putative	-0.0614841	0.785627	other	●	●
PBANKA_0304300	adenylosuccinate lyase, putative	-0.0613356	0.845543	other
PBANKA_0616900	conserved Plasmodium protein, unknown function	-0.0612781	0.844131	other
PBANKA_1353100	conserved Plasmodium protein, unknown function	-0.0599102	0.871477	other
PBANKA_0304600	iron-sulfur assembly protein, putative	-0.0598605	0.892089	other
PBANKA_0622700	mago nashi protein homologue, putative	-0.0593509	0.817493	other
PBANKA_1236400	AFG1-like ATPase, putative	-0.0577871	0.821337	other	●
PBANKA_1033300	conserved Plasmodium protein, unknown function	-0.0575942	0.861628	other
PBANKA_1457700	conserved Plasmodium protein, unknown function	-0.0574301	0.80833	other
PBANKA_0819200	50S ribosomal protein L3, apicoplast, putative	-0.0573648	0.876608	other	●
PBANKA_1118000	heptatricopeptide repeat-containing protein, putative	-0.057053	0.85409	male
PBANKA_1313800	signal recognition particle subunit SRP54, putative	-0.0570133	0.793035	other
PBANKA_1309300	conserved Plasmodium protein, unknown function	-0.0569921	0.871477	other
PBANKA_1239700	S-adenosyl-L-methionine-dependent tRNA 4-demethylwyosine synthase, putative	-0.0568714	0.874737	other
PBANKA_0931200	heat shock protein 101	-0.0568711	0.909573	other
PBANKA_0412300	conserved protein, unknown function	-0.0567857	0.842218	other
PBANKA_1130300	reactive oxygen species modulator 1, putative	-0.0567795	0.872168	other
PBANKA_1120900	conserved Plasmodium protein, unknown function	-0.0557106	0.853634	other
PBANKA_0831100	zinc finger protein, putative	-0.0552537	0.809081	other
PBANKA_0915100	LEM3/CDC50 family protein, putative	-0.0551972	0.95502	other
PBANKA_1303100	conserved Plasmodium protein, unknown function	-0.0551491	0.918053	other
PBANKA_0513400	LEM3/CDC50 family protein, putative	-0.0544708	0.893658	other
PBANKA_0941500	40S ribosomal protein S4, putative	-0.0536018	0.854903	other
PBANKA_1102600	Tim10/DDP family zinc finger protein, putative	-0.0534568	0.893902	other
PBANKA_1450900	conserved protein, unknown function	-0.0534539	0.841148	other
PBANKA_1131700	RAP protein, putative	-0.052937	0.858305	other		●
PBANKA_1237500	pre-mRNA-splicing factor BUD31, putative	-0.0524575	0.893902	other
PBANKA_0833000	profilin	-0.0520691	0.93048	other		●
PBANKA_0402800	EH domain-containing protein, putative	-0.0520445	0.913416	other
PBANKA_1360900	GTPase, putative	-0.0517256	0.885717	other
PBANKA_0902500	oocyst rupture protein 1	-0.0507912	0.870496	other	●	●
PBANKA_1342800	nicotinamide/nicotinic acid mononucleotide adenylyltransferase, putative	-0.0500579	0.886407	other
PBANKA_1316800	dynactin subunit 4, putative	-0.0500104	0.867153	other
PBANKA_1232000	conserved Plasmodium protein, unknown function	-0.049795	0.867169	other
PBANKA_1122500	conserved Plasmodium protein, unknown function	-0.0494532	0.905921	other	●
PBANKA_1347200	nucleotidyltransferase, putative	-0.0493021	0.831234	other
PBANKA_1451000	conserved Plasmodium protein, unknown function	-0.0492078	0.845543	other
PBANKA_0914100	conserved Plasmodium protein, unknown function	-0.048498	0.871938	other	●
PBANKA_1234900	protein phosphatase PPM9	-0.0472159	0.857127	other
PBANKA_0309000	ribosomal protein L12, mitochondrial, putative	-0.0470629	0.850244	other
PBANKA_1131000	V-type proton ATPase 21 kDa proteolipid subunit, putative	-0.0465431	0.892806	other
PBANKA_1453500	HD superfamily phosphohydrolase protein, putative	-0.0461518	0.883253	other
PBANKA_1239100	conserved Plasmodium protein, unknown function	-0.0459148	0.874737	other
PBANKA_1139000	conserved Plasmodium protein, unknown function	-0.0457626	0.896138	other
PBANKA_1143200	conserved Plasmodium protein, unknown function	-0.0456886	0.918162	other
PBANKA_0606600	conserved Plasmodium protein, unknown function	-0.0450295	0.914363	other
PBANKA_0504800	conserved Plasmodium protein, unknown function	-0.0448899	0.855787	male
PBANKA_0905200	oocyst capsule protein Cap93	-0.0445701	0.917304	other	●	●
PBANKA_1237900	mitochondrial-processing peptidase subunit alpha, putative	-0.0444337	0.862329	other	●
PBANKA_1220200	lysophospholipase, putative	-0.0440837	0.938475	other
PBANKA_1104300	centrosomal protein CEP120, putative	-0.0439103	0.883253	other
PBANKA_0405800	spindle and kinetochore-associated protein 2, putative	-0.0437435	0.862819	other
PBANKA_1461100	pre-mRNA-splicing factor RBM22, putative	-0.0436887	0.893902	other
PBANKA_1352700	conserved Plasmodium protein, unknown function	-0.043507	0.877734	other
PBANKA_0937700	60S ribosomal protein L36, putative	-0.0434426	0.906981	other
PBANKA_0929400	myosin light chain B, putative	-0.0431359	0.861628	female	●
PBANKA_1117900	trafficking protein particle complex subunit 6A, putative	-0.0428935	0.883253	other
PBANKA_1227000	filament assembling protein, putative	-0.0428019	0.893301	other
PBANKA_1331900	eukaryotic initiation factor 4a, putative	-0.0416449	0.868181	other
PBANKA_0717800	60S ribosomal protein L15, putative	-0.041642	0.856169	other	●	●
PBANKA_1021800	mitochondrial import inner membrane translocase subunit TIM8, putative	-0.0415072	0.902188	other
PBANKA_1313000	transcription factor IIIb subunit, putative	-0.0413794	0.912028	other
PBANKA_1429700	conserved Plasmodium protein, unknown function	-0.041202	0.849064	other
PBANKA_1344700	apicoplast calcium binding protein 1, putative	-0.0407215	0.871938	other	●
PBANKA_1213800	conserved Plasmodium protein, unknown function	-0.04006	0.914103	other
PBANKA_1130000	Ran-binding protein, putative	-0.0397954	0.929169	other	●
PBANKA_1343000	ribose-phosphate pyrophosphokinase, putative	-0.0395462	0.877631	other
PBANKA_0408600	eukaryotic translation initiation factor 3 subunit K, putative	-0.039538	0.884515	other
PBANKA_1362600	GPN-loop GTPase, putative	-0.0394212	0.894253	other
PBANKA_1200900	conserved protein, unknown function	-0.0391732	0.898209	other
PBANKA_1004300	conserved Plasmodium protein, unknown function	-0.0377367	0.880549	other
PBANKA_1128600	cullin-like protein, putative	-0.037568	0.94315	other	●
PBANKA_1463600	transcription initiation factor IIA subunit 2, putative	-0.0364263	0.914887	other
PBANKA_0817300	conserved Plasmodium protein, unknown function	-0.0363703	0.913964	female
PBANKA_0518200	flavoprotein subunit of succinate dehydrogenase, putative	-0.0362509	0.893641	other
PBANKA_1136400	ER membrane protein complex subunit 3, putative	-0.0358752	0.918053	other
PBANKA_1326300	cytochrome c1 precursor, putative	-0.0358211	0.887278	other	●	●
PBANKA_0613300	LITAF-like zinc finger protein, putative	-0.035586	0.914103	other
PBANKA_0824800	polyadenylate-binding protein 2, putative	-0.035244	0.913416	other
PBANKA_1212600	male gamete fusion factor HAP2	-0.0350773	0.906213	male
PBANKA_0621600	conserved Plasmodium protein, unknown function	-0.0349461	0.912959	other	●
PBANKA_0205800	eukaryotic translation initiation factor 2-alpha kinase 2	-0.0344895	0.931527	other
PBANKA_0921800	steryl ester hydrolase, putative	-0.0344127	0.94025	other		●
PBANKA_0716300	Rab5-interacting protein, putative	-0.0339689	0.925156	other
PBANKA_0503600	60S ribosomal protein L30e, putative	-0.0338848	0.899654	other	●
PBANKA_0928000	conserved Plasmodium protein, unknown function	-0.0338267	0.918053	other
PBANKA_0707600	serine/threonine protein kinase VPS15, putative	-0.0336023	0.919764	other
PBANKA_1221600	cell division cycle ATPase, putative	-0.0326365	0.884353	other
PBANKA_1324400	60S ribosomal protein L27, putative	-0.0322038	0.90482	other
PBANKA_0605300	eukaryotic translation initiation factor 5, putative	-0.0318091	0.883666	other
PBANKA_0941700	WD repeat-containing protein WRAP73, putative	-0.0316597	0.948119	male
PBANKA_0303400	RNA-binding protein, putative	-0.0316428	0.916346	other
PBANKA_0828900	conserved Plasmodium protein, unknown function	-0.0312629	0.929855	male
PBANKA_0404400	conserved protein, unknown function	-0.0311152	0.913817	other	●
PBANKA_1307100	heptatricopeptide repeat-containing protein, putative	-0.0309244	0.928879	other
PBANKA_0409300	phosphatidylinositol 3- and 4-kinase, putative	-0.0308565	0.90482	other	●
PBANKA_1440500	conserved Plasmodium protein, unknown function	-0.0305897	0.933841	other
PBANKA_1227200	peptidyl-prolyl cis-trans isomerase, putative	-0.0304364	0.909182	other
PBANKA_1414000	conserved protein, unknown function	-0.0302557	0.939246	other
PBANKA_1464000	conserved Plasmodium protein, unknown function	-0.0301489	0.93048	other
PBANKA_0314200	calcium-dependent protein kinase 1	-0.029743	0.894585	other	●	●
PBANKA_1415300	protein transport protein SEC20, putative	-0.02951	0.929245	other
PBANKA_1025000	conserved protein, unknown function	-0.0287302	0.941055	other
PBANKA_1023400	glutathione reductase, putative	-0.0286407	0.918053	other
PBANKA_0917500	structural maintenance of chromosomes protein 1, putative	-0.0282512	0.95568	other
PBANKA_0111600	rhoptry protein ROP14, putative	-0.0281023	0.964442	other
PBANKA_0834200	conserved Plasmodium protein, unknown function	-0.0277446	0.931167	other	●	●
PBANKA_0811700	SNARE protein, putative	-0.0273781	0.912161	other
PBANKA_1124500	poly(A) polymerase PAP, putative	-0.0266712	0.922219	other
PBANKA_0111100	6-cysteine protein	-0.0265195	0.962441	other
PBANKA_0908100	conserved Plasmodium protein, unknown function	-0.0263818	0.94873	other
PBANKA_0208200	conserved Plasmodium protein, unknown function	-0.026368	0.924223	other
PBANKA_1032600	cytidine diphosphate-diacylglycerol synthase, putative	-0.0256689	0.925156	other
PBANKA_0524300	tryptophan-rich protein	-0.0235152	0.955087	other		●
PBANKA_1353200	mitotic-spindle organizing protein 1, putative	-0.0233657	0.945376	other
PBANKA_1135100	40S ribosomal protein S15, putative	-0.0232253	0.94568	other	●
PBANKA_1305800	RNA polymerase II transcription factor B subunit 5, putative	-0.0232042	0.951574	other	●
PBANKA_0713700	tRNA modification GTPase, putative	-0.0231558	0.955494	other
PBANKA_1354500	60S ribosomal protein L18-2, putative	-0.022992	0.942282	other	●
PBANKA_0518000	ribosomal protein L27, putative	-0.0224211	0.948007	other
PBANKA_1138300	transmembrane and coiled-coil domain-containing protein 1, putative	-0.0214099	0.935146	other	●
PBANKA_0715400	ATP synthase-associated protein, putative	-0.0210412	0.961146	other
PBANKA_0307400	conserved Plasmodium protein, unknown function	-0.020452	0.963622	other	●
PBANKA_1336700	conserved Plasmodium protein, unknown function	-0.0202418	0.929026	other
PBANKA_0716500	RNA-binding protein, putative	-0.0194445	0.958349	male
PBANKA_0800400	conserved Plasmodium protein, unknown function	-0.0189858	0.955909	other		●
PBANKA_1319700	AP2 domain transcription factor, putative	-0.0187409	0.962926	other
PBANKA_0401400	RNA-binding protein, putative	-0.0184691	0.957413	other
PBANKA_0614500	eukaryotic translation initiation factor 3 subunit I, putative	-0.0182473	0.962926	other
PBANKA_0504200	RNA-binding protein 34, putative	-0.0182141	0.963863	other
PBANKA_1108100	guanidine nucleotide exchange factor, putative	-0.0174415	0.956556	other
PBANKA_0613900	PDCD2 domain-containing protein, putative	-0.0173637	0.972599	other
PBANKA_1306000	replication factor A protein 3, putative	-0.0172576	0.962926	male
PBANKA_0206000	ATP synthase-associated protein, putative	-0.0167122	0.94568	other
PBANKA_1311300	inner membrane complex protein, putative	-0.0164095	0.968326	female	●	●
PBANKA_0716400	conserved Plasmodium protein, unknown function	-0.0157531	0.958294	male
PBANKA_0110200	lsm12, putative	-0.0153342	0.964442	other
PBANKA_0315100	ATP-dependent RNA helicase DDX47, putative	-0.0153073	0.971341	other
PBANKA_0511600	conserved Plasmodium protein, unknown function	-0.0151597	0.969137	other
PBANKA_1118200	conserved protein, unknown function	-0.0150403	0.965291	other
PBANKA_1119900	DnaJ protein, putative	-0.0150089	0.970634	male
PBANKA_0939800	nucleic acid binding protein, putative	-0.0147327	0.958349	other
PBANKA_0713100	rhoptry neck protein 5, putative	-0.0139553	0.985869	other	●
PBANKA_1205400	rho GTPase-activating protein, putative	-0.0135771	0.958354	male
PBANKA_0703600	translation initiation factor IF-2, putative	-0.0134472	0.976547	other
PBANKA_0805600	EKC/KEOPS complex subunit BUD32, putative	-0.0134043	0.965291	other
PBANKA_0809600	conserved Plasmodium protein, unknown function	-0.0132768	0.972649	other
PBANKA_1030300	nuclear transport factor 2, putative	-0.0131439	0.968654	other	●
PBANKA_0604900	conserved Plasmodium protein, unknown function	-0.0128475	0.990071	other
PBANKA_1117800	rhomboid protease ROM10	-0.0128338	0.961682	other
PBANKA_1405100	V-type proton ATPase subunit H, putative	-0.0125492	0.963256	other	●
PBANKA_1406800	40S ribosomal protein S27, putative	-0.0117915	0.967955	other
PBANKA_0412100	serine/threonine protein phosphatase 6	-0.0110409	0.971341	male
PBANKA_1038000	cytochrome c, putative	-0.0108418	0.98918	other
PBANKA_1354100	ras-related protein Rab-11B, putative	-0.01063	0.975622	other	●	●
PBANKA_1324000	60S ribosomal protein L29, putative	-0.0104103	0.979612	other
PBANKA_0404900	cytochrome c oxidase subunit ApiCOX35, putative	-0.0101817	0.971341	other		●
[truncated: 2,103 more rows]
