# Supplementary material for: Coordinated regulation of gene expression in Plasmodium female gametocytes by two transcription factors
Source: eLife. 2024 Jan 22;12:RP88317. doi: 10.7554/eLife.88317 (PMC10945693; doi:10.7554/eLife.88317)
Supplement: Supplementary file 2. — (a) Peaks identified in ChIP-seq of PFG with their nearest genes (experiment 1). (b) Peaks identified in ChIP-seq of PFG (experiment 2). (c) Peaks identified in ChIP-seq of PFG using AP2-FG(-) parasites (experiment 1). (d) Peaks identified in ChIP-seq of PFG using AP2-FG(-) parasites (experiment 2). (e) Peaks identified in ChIP-seq of sAP2-FG (experiment 1). (f) Peaks identified in ChIP-seq of sAP2-FG (experiment 2). (g) Peaks identified in DIP-seq using recombinant AP2 domain of AP2-FG and P. berghei genomic DNA. [file elife-88317-supp2.xlsx]

## Sheet: 2a
Supplementary file 2a. Peaks identified in ChIP-seq of PFG with their nearest genes <Exp 1>
chr	start	end	length	abs_summit	pileup	-log10(p-value)	fold_enrichment	-log10(q-value)	common	5-associated gene #1	distance from ATG #1	5'-associated gene #2	distance from ATG #2
PbANKA_01_v3	52840	55944	3105	54530	499	152.879	4.29277	150.675	●	PBANKA_0100900	1723	PBANKA_0100800	2823
PbANKA_01_v3	62583	63214	632	62851	295	70.1532	3.43839	68.5084	●	PBANKA_0101100	814
PbANKA_01_v3	110653	112204	1552	111050	495	170.151	4.7856	167.685	●	PBANKA_0102400	387	PBANKA_0102500	1412
PbANKA_01_v3	137084	137519	436	137304	277	61.5827	3.26581	59.9925	●	PBANKA_0102900	741	PBANKA_0103000	2978
PbANKA_01_v3	137896	140381	2486	138418	363	101.49	3.93505	99.6635	●	PBANKA_0102900	1855	PBANKA_0103000	1864
PbANKA_01_v3	145200	147093	1894	146190	449	149.169	4.62022	147.005	●	PBANKA_0103300	2273
PbANKA_01_v3	172777	174161	1385	173074	385	127.826	4.60115	125.837	●	PBANKA_0104000	14	PBANKA_0104100	823
PbANKA_01_v3	185810	186987	1178	186516	365	102.255	3.94228	100.423	●	PBANKA_0104500	520	PBANKA_0104400	1413
PbANKA_01_v3	187700	188476	777	188060	481	182.405	5.28791	179.649	●
PbANKA_01_v3	203709	205823	2115	204939	500	178.809	4.97985	176.152	●
PbANKA_01_v3	210483	211495	1013	211124	301	68.9457	3.34539	67.3084	●	PBANKA_0105100	220
PbANKA_01_v3	221804	222402	599	222020	356	101.46	3.99801	99.6331	●	PBANKA_0105300	58	PBANKA_0105400	2513
PbANKA_01_v3	222522	224080	1559	222981	379	98.913	3.72093	97.1021	●	PBANKA_0105300	1019	PBANKA_0105400	1552
PbANKA_01_v3	238990	240293	1304	239267	311	73.7386	3.4356	72.0727	●
PbANKA_01_v3	254493	256158	1666	254921	445	142.058	4.44809	139.961	●	PBANKA_0106200	1066	PBANKA_0106300	3279
PbANKA_01_v3	275155	275639	485	275396	404	124.695	4.30289	122.727	●
PbANKA_01_v3	284779	285665	887	285034	386	107.479	3.92711	105.617	●	PBANKA_0107000	286
PbANKA_01_v3	321541	322262	722	321958	412	100.932	3.54583	99.1083	●	PBANKA_0107800	248	PBANKA_0107700	1288
PbANKA_01_v3	330445	331122	678	330797	397	101.805	3.67256	99.9759	●
PbANKA_01_v3	344973	346284	1312	345401	357	80.7694	3.32939	79.0626	●	PBANKA_0108300	1098	PBANKA_0108400	1806
PbANKA_01_v3	361607	363240	1634	362910	468	150.943	4.4958	148.76	●	PBANKA_0108800	293	PBANKA_0108700	3274
PbANKA_01_v3	381021	381820	800	381522	405	116.501	4.04235	114.586	●	PBANKA_0109600	292
PbANKA_01_v3	399753	401189	1437	400764	480	145.668	4.25293	143.538	●
PbANKA_01_v3	408766	410978	2213	409175	345	75.6921	3.25355	74.0146	●	PBANKA_0110100	622	PBANKA_0110200	2536
PbANKA_01_v3	416220	417766	1547	416696	497	137.809	3.93352	135.747	●	PBANKA_0110400	370
PbANKA_01_v3	427391	429970	2580	428236	497	160.668	4.51098	158.36	●	PBANKA_0110800	498
PbANKA_01_v3	437318	442019	4702	440891	494	149.704	4.24985	147.535	●	PBANKA_0111300	797	PBANKA_0111400	1323
PbANKA_01_v3	454556	456520	1965	454814	436	125.512	4.05137	123.538	●	PBANKA_0111800	284	PBANKA_0111900	2278
PbANKA_01_v3	462711	464141	1431	463480	347	80.1928	3.37966	78.4894	●	PBANKA_0112000	1871	PBANKA_0112100	2049
PbANKA_01_v3	479768	480257	490	479997	298	76.372	3.64479	74.6904		PBANKA_0112200	369
PbANKA_02_v3	84994	86252	1259	85581	494	176.37	4.97025	173.772	●
PbANKA_02_v3	87711	88840	1130	88203	499	176.991	4.93842	174.38	●
PbANKA_02_v3	97374	98736	1363	98442	371	94.6774	3.65286	92.8918	●	PBANKA_0202500	908	PBANKA_0202400	1245
PbANKA_02_v3	112449	113273	825	112830	497	123.865	3.6065	121.903	●	PBANKA_0202900	274	PBANKA_0203000	2911
PbANKA_02_v3	134324	135557	1234	134979	496	194.901	5.49727	191.682	●	PBANKA_0203600	420
PbANKA_02_v3	146639	149202	2564	148777	492	165.887	4.69547	163.497	●	PBANKA_0204400	1895
PbANKA_02_v3	154964	156268	1305	155497	500	184.234	5.13495	181.417	●	PBANKA_0204500	696
PbANKA_02_v3	157691	159004	1314	158706	377	87.0051	3.38262	85.2633	●	PBANKA_0204600	1823
PbANKA_02_v3	169159	170370	1212	169515	425	114.963	3.84117	113.058	●	PBANKA_0205000	408	PBANKA_0205100	884
PbANKA_02_v3	170911	171496	586	171236	443	127.305	4.04659	125.319	●
PbANKA_02_v3	180176	181231	1056	180808	414	84.7566	3.11194	83.0275	●	PBANKA_0205200	1900
PbANKA_02_v3	202594	204295	1702	203187	492	157.384	4.46569	155.122	●	PBANKA_0205800	1749	PBANKA_0205900	3599
PbANKA_02_v3	255547	256480	934	256135	312	72.4798	3.38371	70.8212	●	PBANKA_0207500	635	PBANKA_0207400	1494
PbANKA_02_v3	290801	292001	1201	291396	444	158.701	4.96475	156.421	●	PBANKA_0208400	571
PbANKA_02_v3	322792	325181	2390	324600	499	182.298	5.08947	179.545	●	PBANKA_0209300	194	PBANKA_0209200	2096
PbANKA_02_v3	326679	330498	3820	327529	498	171.081	4.78338	168.597	●
PbANKA_02_v3	346207	346609	403	346417	280	55.1741	3.00487	53.6283	●
PbANKA_02_v3	358767	360661	1895	359163	477	156.899	4.58207	154.644	●
PbANKA_02_v3	362594	363636	1043	363368	377	95.1885	3.62348	93.3996	●
PbANKA_02_v3	393208	394455	1248	393577	331	67.9401	3.1022	66.309	●	PBANKA_0210600	934	PBANKA_0210700	2118
PbANKA_02_v3	411860	412772	913	412140	411	104.226	3.64285	102.383	●	PBANKA_0211300	381
PbANKA_02_v3	415036	415885	850	415301	308	71.4054	3.37745	69.7531	●	PBANKA_0211400	273	PBANKA_0211500	754
PbANKA_02_v3	435626	436310	685	436077	381	115.57	4.23	113.66	●	PBANKA_0212000	133
PbANKA_02_v3	444246	445852	1607	444778	472	157.853	4.65467	155.585	●	PBANKA_0212100	626
PbANKA_02_v3	513480	515009	1530	514304	500	193.106	5.3964	189.968	●	PBANKA_0214000	443
PbANKA_02_v3	537737	538342	606	537958	310	68.9892	3.27833	67.3515	●	PBANKA_0214300	142	PBANKA_0214400	5283
PbANKA_02_v3	540861	542855	1995	542483	443	150.304	4.71387	148.128	●	PBANKA_0214400	758	PBANKA_0214300	4667
PbANKA_02_v3	550171	551765	1595	550953	354	74.3823	3.15771	72.7126	●	PBANKA_0214600	4590
PbANKA_03_v3	27386	28221	836	27607	283	60.0336	3.16077	58.4539	●	PBANKA_0300700	240	PBANKA_0300800	635
PbANKA_03_v3	40600	41204	605	40853	286	59.0716	3.10377	57.4986	●	PBANKA_0301200	277	PBANKA_0301100	468
PbANKA_03_v3	43056	44088	1033	43481	342	77.5372	3.3311	75.8488	●	PBANKA_0301300	397	PBANKA_0301400	2434
PbANKA_03_v3	53567	55034	1468	54330	493	178.043	5.0284	175.406	●	PBANKA_0301700	572	PBANKA_0301600	728
PbANKA_03_v3	55995	56986	992	56363	404	133.828	4.59639	131.796	●	PBANKA_0301800	583
PbANKA_03_v3	65835	70032	4198	68863	498	175.072	4.89426	172.503	●
PbANKA_03_v3	106507	107938	1432	107573	496	196.785	5.55536	193.474	●	PBANKA_0303600	211	PBANKA_0303500	1363
PbANKA_03_v3	117147	118792	1646	117710	425	118.616	3.94321	116.688	●	PBANKA_0303900	1880
PbANKA_03_v3	133488	134322	835	133959	450	109.14	3.52468	107.268	●	PBANKA_0304100	1603
PbANKA_03_v3	136223	136944	722	136696	330	82.2209	3.57439	80.5061	●
PbANKA_03_v3	191977	193499	1523	192518	492	146.536	4.18416	144.397	●	PBANKA_0305500	601	PBANKA_0305600	1807
PbANKA_03_v3	226262	226766	505	226488	386	112.35	4.07946	110.46	●
PbANKA_03_v3	238786	239425	640	239098	313	74.4963	3.44609	72.8258	●	PBANKA_0306700	2506
PbANKA_03_v3	241345	243835	2491	243267	498	132.45	3.79955	130.428	●	PBANKA_0306900	616	PBANKA_0306800	2181
PbANKA_03_v3	253838	255817	1980	255183	372	85.9289	3.38388	84.1932	●	PBANKA_0307100	1619
PbANKA_03_v3	257506	259765	2260	258899	490	164.536	4.67642	162.168	●
PbANKA_03_v3	295075	295883	809	295431	439	137.402	4.36619	135.343	●	PBANKA_0308400	1452
PbANKA_03_v3	304860	305855	996	305242	466	137.824	4.15395	135.762	●
PbANKA_03_v3	327527	328273	747	327823	342	73.1575	3.19491	71.4949	●	PBANKA_0309200	513	PBANKA_0309400	1025
PbANKA_03_v3	352486	354968	2483	354090	499	183.029	5.11055	180.253	●
PbANKA_03_v3	368632	369725	1094	369445	418	132.624	4.41678	130.601	●	PBANKA_0310700	260
PbANKA_03_v3	375193	375909	717	375552	373	78.8292	3.17419	77.1332	●	PBANKA_0310900	616	PBANKA_0310800	1032
PbANKA_03_v3	377928	378375	448	378163	321	94.6768	4.10775	92.8912	●
PbANKA_03_v3	390189	390654	466	390401	342	82.7493	3.49739	81.0315	●	PBANKA_0311400	2426
PbANKA_03_v3	401224	401989	766	401669	429	129.792	4.23152	127.789	●	PBANKA_0311500	758	PBANKA_0311600	1547
PbANKA_03_v3	453527	454617	1091	454046	489	188.916	5.39566	185.945	●	PBANKA_0313100	1077
PbANKA_03_v3	463260	464673	1414	464281	373	86.4639	3.39296	84.7252	●	PBANKA_0313300	930
PbANKA_03_v3	493888	496188	2301	495505	498	164.5	4.60454	162.133	●	PBANKA_0314200	780
PbANKA_03_v3	508704	509444	741	509170	434	137.949	4.42784	135.885	●
PbANKA_03_v3	535690	536298	609	535950	336	84.1565	3.59074	82.4308	●	PBANKA_0315400	2185	PBANKA_0315600	4516
PbANKA_03_v3	560915	562322	1408	561424	485	181.201	5.20643	178.481	●	PBANKA_0316300	1430
PbANKA_03_v3	579461	579831	371	579636	222	44.9271	3.03711	43.4576		PBANKA_0316600	1465	PBANKA_0316700	2845
PbANKA_04_v3	38481	39841	1361	38950	350	76.9382	3.25917	75.2533	●	PBANKA_0401200	1630
PbANKA_04_v3	46434	47613	1180	47221	472	177.45	5.23767	174.828	●	PBANKA_0401300	916
PbANKA_04_v3	50850	52649	1800	51492	400	87.38	3.25414	85.6361	●	PBANKA_0401400	2272
PbANKA_04_v3	61840	62502	663	62103	459	160.138	4.84897	157.838	●	PBANKA_0401600	316
PbANKA_04_v3	66481	67209	729	66697	355	72.9778	3.11056	71.3162	●	PBANKA_0401700	71	PBANKA_0401800	2301
PbANKA_04_v3	72941	76920	3980	74125	495	167.921	4.72404	165.496	●
PbANKA_04_v3	79847	81594	1748	80340	498	177.996	4.97667	175.36	●	PBANKA_0402100	1265
PbANKA_04_v3	93326	94912	1587	93970	494	187.415	5.29327	184.501	●	PBANKA_0402500	174
PbANKA_04_v3	97663	99697	2035	98978	476	161.654	4.72543	159.333	●	PBANKA_0402700	798	PBANKA_0402600	1638
PbANKA_04_v3	101859	103061	1203	102729	473	162.958	4.79188	160.617	●
PbANKA_04_v3	137051	137597	547	137293	268	55.2593	3.09441	53.7129	●
PbANKA_04_v3	138714	140389	1676	139588	370	93.9724	3.63882	92.1909	●	PBANKA_0403700	1110	PBANKA_0403600	1642
PbANKA_04_v3	163279	164085	807	163712	334	70.7182	3.17024	69.0699	●	PBANKA_0404100	322
PbANKA_04_v3	171568	173245	1678	171949	434	143.163	4.58544	141.056	●	PBANKA_0404400	371
PbANKA_04_v3	178804	180675	1872	180071	468	150.943	4.4958	148.76	●	PBANKA_0404700	570	PBANKA_0404800	1001
PbANKA_04_v3	194488	196291	1804	194983	401	120.734	4.20688	118.792	●
PbANKA_04_v3	198151	201274	3124	200854	499	160.943	4.50156	158.633	●	PBANKA_0405600	273	PBANKA_0405500	2650
PbANKA_04_v3	214649	216207	1559	215255	497	145.903	4.13187	143.771	●	PBANKA_0406000	399	PBANKA_0406100	1553
PbANKA_04_v3	259293	259742	450	259515	336	97.4746	4.05378	95.6723	●
PbANKA_04_v3	262287	263769	1483	262818	470	186.088	5.53637	183.216	●
PbANKA_04_v3	264541	265726	1186	265247	495	186.87	5.26594	183.974	●	PBANKA_0407300	272
PbANKA_04_v3	271566	272260	695	271947	304	68.5852	3.30931	66.9501	●	PBANKA_0407400	891	PBANKA_0407500	1748
PbANKA_04_v3	276661	277910	1250	277271	400	95.2677	3.46794	93.4785	●	PBANKA_0407600	401
PbANKA_04_v3	298768	299956	1189	299335	493	158.039	4.47475	155.769	●	PBANKA_0408300	848
PbANKA_04_v3	310716	312104	1389	311470	485	137.624	4.00984	135.563	●	PBANKA_0408400	1051
PbANKA_04_v3	340286	344249	3964	343398	455	133.783	4.13054	131.752	●	PBANKA_0409400	1524	PBANKA_0409300	3237
PbANKA_04_v3	354757	356549	1793	355512	477	137.245	4.05685	135.187	●	PBANKA_0409500	836	PBANKA_0409600	1192
PbANKA_04_v3	358640	360151	1512	359411	498	180.982	5.0619	178.266	●	PBANKA_0409700	484
PbANKA_04_v3	365611	367551	1941	366177	476	173.464	5.07149	170.931	●
PbANKA_04_v3	381322	382601	1280	381959	454	134.094	4.14685	132.06	●	PBANKA_0410400	447	PBANKA_0410500	2381
PbANKA_04_v3	458990	461244	2255	460287	489	159.575	4.54984	157.283	●	PBANKA_0412800	1828	PBANKA_0412900	1845
PbANKA_04_v3	476746	482119	5374	477895	496	155.914	4.3944	153.672	●	PBANKA_0413200	1197
PbANKA_04_v3	483841	485046	1206	484540	500	158.511	4.42977	156.234	●	PBANKA_0413500	320
PbANKA_04_v3	501818	504030	2213	503447	484	144.363	4.18827	142.246	●	PBANKA_0414100	947	PBANKA_0414000	2415
PbANKA_04_v3	619284	619753	470	619516	313	81.975	3.71376	80.2617	●
PbANKA_04_v3	638207	638780	574	638486	449	172.56	5.35542	170.046	●
PbANKA_04_v3	645900	647944	2045	646515	500	182.099	5.0735	179.352	●	PBANKA_0417200	432	PBANKA_0417300	1966
PbANKA_04_v3	662607	663876	1270	663103	500	187.969	5.24383	185.034	●	PBANKA_0417600	370
PbANKA_04_v3	672482	673072	591	672827	340	77.1757	3.33354	75.4893	●	PBANKA_0417800	518
PbANKA_05_v3	74531	75258	728	74972	452	133.785	4.15419	131.753	●	PBANKA_0502000	614
PbANKA_05_v3	94594	95905	1312	95148	434	147.51	4.71983	145.362	●	PBANKA_0502500	794
PbANKA_05_v3	98622	99977	1356	99404	500	165.033	4.60149	162.658	●	PBANKA_0502650	455	PBANKA_0502600	1000
PbANKA_05_v3	126168	127189	1022	126728	498	194.258	5.4542	191.069	●
PbANKA_05_v3	139165	142719	3555	142057	406	124.868	4.28952	122.899	●	PBANKA_0503500	3087	PBANKA_0503600	4162
PbANKA_05_v3	145327	146382	1056	145911	430	107.145	3.59612	105.285	●	PBANKA_0503600	308	PBANKA_0503500	6941
PbANKA_05_v3	172489	173523	1035	173035	428	124.933	4.0991	122.963	●	PBANKA_0504300	299
PbANKA_05_v3	176299	177940	1642	176887	499	200.308	5.62819	196.807	●	PBANKA_0504400	373	PBANKA_0504500	1122
PbANKA_05_v3	199681	202117	2437	201222	483	159.299	4.59497	157.012	●	PBANKA_0505100	1663
PbANKA_05_v3	212347	213673	1327	212758	413	112.752	3.86841	110.86	●	PBANKA_0505400	466
PbANKA_05_v3	221687	222752	1066	222224	500	137.006	3.89489	134.95	●	PBANKA_0505800	276	PBANKA_0505700	454
PbANKA_05_v3	279163	279791	629	279440	467	163.952	4.88118	161.595	●
PbANKA_05_v3	286723	287957	1235	287385	296	59.4864	3.04935	57.9104	●	PBANKA_0506700	525	PBANKA_0506800	1210
PbANKA_05_v3	292846	294153	1308	293247	500	148.709	4.18018	146.55	●	PBANKA_0506900	289	PBANKA_0507000	2142
PbANKA_05_v3	298208	299698	1491	298516	463	160.615	4.82248	158.309	●
PbANKA_05_v3	345159	347824	2666	346941	458	132.869	4.08279	130.844	●	PBANKA_0508200	2479	PBANKA_0508100	3381
PbANKA_05_v3	364246	365001	756	364642	473	147.081	4.34676	144.937	●
PbANKA_05_v3	365708	366764	1057	366295	444	120.037	3.84285	118.1	●	PBANKA_0509000	545
PbANKA_05_v3	379079	380153	1075	379677	382	94.1366	3.55631	92.3542	●	PBANKA_0509300	942	PBANKA_0509200	2112
PbANKA_05_v3	413059	414469	1411	413886	491	170.801	4.84164	168.322	●
PbANKA_05_v3	415578	416833	1256	416166	455	168.715	5.15839	166.276	●
PbANKA_05_v3	419144	421009	1866	420151	353	100.33	3.98779	98.5099	●	PBANKA_0510100	969
PbANKA_05_v3	438396	440228	1833	439198	494	188.055	5.31245	185.117	●	PBANKA_0510800	165	PBANKA_0510900	3329
PbANKA_05_v3	464872	466792	1921	465806	468	181.307	5.40664	178.583	●	PBANKA_0511700	178
PbANKA_05_v3	469981	471994	2014	471493	494	181.477	5.11773	178.75	●	PBANKA_0512000	411	PBANKA_0511900	1594
PbANKA_05_v3	490038	493404	3367	490847	495	207.415	5.90523	203.537	●
PbANKA_05_v3	500582	501305	724	500922	369	113.042	4.26454	111.147	●	PBANKA_0513000	828	PBANKA_0513100	2594
PbANKA_05_v3	515353	517390	2038	516707	334	66.9446	3.05317	65.3198	●	PBANKA_0513500	128	PBANKA_0513600	1026
PbANKA_05_v3	546646	549455	2810	548282	421	106.746	3.64423	104.888	●	PBANKA_0514300	3675
PbANKA_05_v3	558597	564293	5697	562585	497	192.201	5.40339	189.098	●	PBANKA_0515000	443
PbANKA_05_v3	570740	571435	696	571140	373	108.926	4.08792	107.055	●	PBANKA_0515350	167
PbANKA_05_v3	575353	576184	832	575722	308	63.871	3.1185	62.266	●	PBANKA_0515400	1503
PbANKA_05_v3	590793	592583	1791	591122	401	88.5726	3.28023	86.822	●	PBANKA_0515800	1509	PBANKA_0515900	1916
PbANKA_05_v3	618247	618863	617	618579	415	122.906	4.14889	120.95	●	PBANKA_0516800	331	PBANKA_0516700	572
PbANKA_05_v3	626987	629122	2136	628860	496	215.157	6.14694	210.627
PbANKA_05_v3	642917	644276	1360	643619	500	209.694	5.91247	205.635	●	PBANKA_0517600	281
PbANKA_05_v3	649810	651117	1308	650428	407	129.536	4.42687	127.534	●	PBANKA_0517700	2109
PbANKA_05_v3	675836	676810	975	676446	431	120.91	3.96161	118.967	●	PBANKA_0518700	633
PbANKA_05_v3	713584	714490	907	714064	310	65.6757	3.16565	64.0589	●	PBANKA_0519800	474
PbANKA_05_v3	720709	722355	1647	721882	497	162.769	4.56685	160.431	●	PBANKA_0519900	2134
PbANKA_05_v3	725511	727439	1929	726623	484	199.49	5.7929	196.037	●	PBANKA_0520100	303	PBANKA_0520000	1353
PbANKA_05_v3	729611	731515	1905	730705	499	172.898	4.82419	170.376	●
PbANKA_05_v3	764853	766907	2055	766293	311	69.5114	3.28887	67.8705	●	PBANKA_0521200	1279
PbANKA_05_v3	791444	793805	2362	792889	495	205.097	5.83023	201.374	●
PbANKA_05_v3	800038	803640	3603	801103	352	85.6395	3.51465	83.9054	●	PBANKA_0521700	3288
PbANKA_05_v3	827786	830517	2732	828708	498	196.932	5.53593	193.614	●	PBANKA_0522300	273
PbANKA_05_v3	844317	847636	3320	845169	495	171.281	4.81698	168.792	●	PBANKA_0522600	1198	PBANKA_0522700	2980
PbANKA_05_v3	850418	852232	1815	851801	375	108.101	4.04264	106.235	●	PBANKA_0522800	190
PbANKA_05_v3	853251	854286	1036	854015	313	62.7711	3.04946	61.1732	●	PBANKA_0522900	678
PbANKA_05_v3	869464	871397	1934	870767	468	153.038	4.55477	150.831	●	PBANKA_0523400	588
PbANKA_05_v3	873175	873759	585	873469	300	61.6146	3.09578	60.0242	●	PBANKA_0523600	153	PBANKA_0523500	247
PbANKA_05_v3	878542	880549	2008	879575	484	160.503	4.61927	158.199	●	PBANKA_0523900	998
PbANKA_05_v3	881896	882867	972	882450	498	192.94	5.41424	189.807	●
PbANKA_05_v3	892043	893914	1872	892982	497	176.12	4.93347	173.529	●	PBANKA_0524200	1984
PbANKA_05_v3	908940	909641	702	909290	477	156.633	4.57467	154.382	●	PBANKA_0524700	825	PBANKA_0524600	4487
PbANKA_06_v3	83960	84647	688	84255	388	114.512	4.12994	112.61	●	PBANKA_0600400	779
PbANKA_06_v3	94353	94814	462	94572	308	67.9489	3.25724	66.3177	●	PBANKA_0600600	432
PbANKA_06_v3	98024	99221	1198	98405	476	157.3	4.60228	155.039	●	PBANKA_0600800	481
PbANKA_06_v3	105340	106886	1547	106471	486	182.868	5.2456	180.096	●	PBANKA_0601000	1508
PbANKA_06_v3	130146	134062	3917	132598	488	194.922	5.59474	191.703	●
PbANKA_06_v3	135008	136248	1241	135553	493	196.23	5.57442	192.946	●
PbANKA_06_v3	144094	145725	1632	144593	498	179.182	5.01042	176.516	●	PBANKA_0601600	820	PBANKA_0601700	2175
PbANKA_06_v3	149036	154624	5589	150550	437	127.268	4.09266	125.282	●
PbANKA_06_v3	166831	167795	965	167292	474	180.495	5.30945	177.795	●
PbANKA_06_v3	169723	172591	2869	171171	498	189.054	5.29779	186.078	●
PbANKA_06_v3	173548	177007	3460	176625	370	81.925	3.28033	80.2119	●	PBANKA_0602800	296	PBANKA_0602700	2780
PbANKA_06_v3	178049	179166	1118	178642	427	148.36	4.82139	146.204	●	PBANKA_0602900	758
PbANKA_06_v3	184988	186547	1560	186078	486	157.59	4.52199	155.326	●
PbANKA_06_v3	190426	192470	2045	191184	497	205.921	5.8306	202.151	●	PBANKA_0603300	415
PbANKA_06_v3	197748	198814	1067	198568	278	60.9744	3.23457	59.3882	●	PBANKA_0603700	87
PbANKA_06_v3	215318	218371	3054	217418	450	139.008	4.31627	136.937	●	PBANKA_0604200	1174	PBANKA_0604100	4521
PbANKA_06_v3	225275	227192	1918	225565	446	172.893	5.40441	170.372	●	PBANKA_0604300	134	PBANKA_0604400	1769
PbANKA_06_v3	259367	260635	1269	260012	497	216.337	6.1722	211.671	●	PBANKA_0605100	305
PbANKA_06_v3	288540	290096	1557	289325	307	64.1633	3.13512	62.5562	●	PBANKA_0605600	1187
PbANKA_06_v3	296341	297443	1103	296865	497	192.201	5.40339	189.098	●	PBANKA_0605800	253	PBANKA_0605900	976
PbANKA_06_v3	305197	306194	998	305788	496	198.147	5.59761	194.766	●	PBANKA_0606200	247
PbANKA_06_v3	350273	350938	666	350580	335	73.8723	3.26312	72.2056	●	PBANKA_0607000	258	PBANKA_0607100	618
PbANKA_06_v3	358028	362016	3989	359538	462	148.039	4.4672	145.886	●	PBANKA_0607300	2482	PBANKA_0607400	2734
PbANKA_06_v3	366501	368769	2269	367894	368	98.0665	3.78203	96.2606	●
PbANKA_06_v3	370667	372954	2288	372196	497	193.517	5.44327	190.361	●
PbANKA_06_v3	376509	379725	3217	376818	363	113.387	4.33891	111.49	●	PBANKA_0607700	94	PBANKA_0607800	2727
PbANKA_06_v3	399301	400955	1655	399997	480	168.933	4.89607	166.49	●	PBANKA_0608500	563
PbANKA_06_v3	404648	407975	3328	405309	468	162.922	4.84047	160.582	●	PBANKA_0608600	1305	PBANKA_0608700	2030
PbANKA_06_v3	424729	426478	1750	425795	499	169.531	4.7317	167.077	●	PBANKA_0609300	185	PBANKA_0609200	2219
PbANKA_06_v3	428735	429938	1204	429678	336	100.607	4.16805	98.7859	●	PBANKA_0609500	266
PbANKA_06_v3	442434	442967	534	442702	429	145.662	4.71393	143.532	●
PbANKA_06_v3	445597	448168	2572	446134	497	183.624	5.14875	180.827	●	PBANKA_0609800	152	PBANKA_0609900	2050
PbANKA_06_v3	451784	453650	1867	453075	482	154.957	4.48484	152.727	●	PBANKA_0610100	194	PBANKA_0610000	1463
PbANKA_06_v3	462080	464009	1930	463504	500	174.73	4.86554	172.17	●	PBANKA_0610200	311
PbANKA_06_v3	466823	468379	1557	467770	386	100.92	3.72785	99.0965	●	PBANKA_0610300	429
PbANKA_06_v3	475875	477433	1559	476114	292	60.4578	3.11073	58.8751		PBANKA_0610400	1010
PbANKA_06_v3	506980	508998	2019	508527	368	95.616	3.7051	93.8245	●	PBANKA_0611600	1467
PbANKA_06_v3	512445	513642	1198	512967	482	190.351	5.52396	187.321	●
PbANKA_06_v3	533496	535087	1592	534558	500	179.401	4.99662	176.73	●	PBANKA_0612400	662	PBANKA_0612300	1878
PbANKA_06_v3	542538	543771	1234	543182	498	157.211	4.41209	154.951	●	PBANKA_0612600	90	PBANKA_0612700	661
PbANKA_06_v3	556405	557720	1316	557071	374	100.744	3.81711	98.9217	●	PBANKA_0613000	1489
PbANKA_06_v3	599611	600317	707	599935	455	162.023	4.94859	159.697	●	PBANKA_0614100	464
PbANKA_06_v3	618798	620157	1360	619627	495	158.319	4.46555	156.044	●	PBANKA_0614800	448
PbANKA_06_v3	710846	712000	1155	711454	493	144.351	4.12177	142.234	●	PBANKA_0616700	450	PBANKA_0616600	638
PbANKA_06_v3	725057	726347	1291	725952	360	76.1258	3.17297	74.4456	●	PBANKA_0617000	994
PbANKA_06_v3	766120	766760	641	766373	332	67.3456	3.07756	65.7183	●	PBANKA_0618500	823
PbANKA_06_v3	773079	775608	2530	774536	496	185.077	5.20197	182.234	●
PbANKA_06_v3	786560	787670	1111	787185	496	188.171	5.29363	185.229	●	PBANKA_0619000	109
PbANKA_06_v3	788915	790424	1510	789933	497	190.347	5.34756	187.318	●
PbANKA_06_v3	792046	793807	1762	793342	498	185.271	5.18624	182.424	●	PBANKA_0619200	468	PBANKA_0619100	2329
PbANKA_06_v3	811357	812766	1410	812251	498	158.228	4.43859	155.955	●
PbANKA_06_v3	826095	827421	1327	826689	500	180.594	5.0305	177.891	●	PBANKA_0620600	255	PBANKA_0620700	552
PbANKA_06_v3	837101	837685	585	837437	377	101.667	3.82138	99.8391	●	PBANKA_0621000	185	PBANKA_0621100	1066
PbANKA_06_v3	854950	855767	818	855492	286	61.2319	3.1822	59.6439	●	PBANKA_0621500	273	PBANKA_0621400	1911
PbANKA_06_v3	863958	868127	4170	867387	500	166.647	4.6447	164.244	●	PBANKA_0621600	3309
PbANKA_06_v3	869820	870689	870	870271	491	176.691	5.00977	174.087	●
PbANKA_06_v3	892763	893615	853	893071	490	134.495	3.89903	132.457	●	PBANKA_0622200	639
PbANKA_06_v3	907050	908350	1301	907275	311	79.6898	3.64858	77.9891	●
PbANKA_06_v3	918193	920003	1811	918539	431	132.028	4.27964	130.009	●	PBANKA_0622800	1021	PBANKA_0622900	2552
PbANKA_07_v3	70202	73163	2962	70528	318	70.4431	3.26956	68.7964
PbANKA_07_v3	120163	122238	2076	120535	321	67.5307	3.153	65.9022	●	PBANKA_0702000	262	PBANKA_0702100	2130
PbANKA_07_v3	126898	127942	1045	127635	467	164.821	4.9071	162.449	●	PBANKA_0702300	587
PbANKA_07_v3	129750	130498	749	130145	287	56.7656	3.01442	55.2088		PBANKA_0702400	859
PbANKA_07_v3	141026	142536	1511	141887	498	177.996	4.97667	175.36	●	PBANKA_0702700	430	PBANKA_0702800	1958
PbANKA_07_v3	145074	146727	1654	146124	498	185.271	5.18624	182.424
PbANKA_07_v3	154612	155271	660	154859	286	56.281	3.00395	54.7276	●	PBANKA_0703000	187	PBANKA_0702900	2387
PbANKA_07_v3	164765	166249	1485	165490	493	172.183	4.86132	169.677	●	PBANKA_0703300	318
PbANKA_07_v3	170448	171803	1356	171216	500	198.093	5.54772	194.716	●	PBANKA_0703500	515
PbANKA_07_v3	182386	184377	1992	183867	360	87.6157	3.51744	85.8705	●	PBANKA_0703900	910	PBANKA_0703800	1914
PbANKA_07_v3	186153	186927	775	186541	498	187.782	5.26008	184.854	●	PBANKA_0704000	567
PbANKA_07_v3	232023	233833	1811	232849	496	197.805	5.58699	194.443	●	PBANKA_0704700	583
PbANKA_07_v3	235292	236344	1053	235804	495	189.43	5.34255	186.438	●	PBANKA_0704900	467	PBANKA_0704800	603
PbANKA_07_v3	277601	278068	468	277842	320	75.7099	3.43261	74.0322	●
PbANKA_07_v3	280269	281639	1371	280757	496	182.6	5.12946	179.837	●
PbANKA_07_v3	288728	289961	1234	289218	496	151.945	4.2919	149.752	●	PBANKA_0706700	234
PbANKA_07_v3	292230	293304	1075	292583	369	87.7324	3.45727	85.9865	●	PBANKA_0706900	529	PBANKA_0706800	692
PbANKA_07_v3	293912	296831	2920	295892	492	185.641	5.26239	182.782	●	PBANKA_0707100	908
PbANKA_07_v3	306285	308938	2654	307465	492	172.352	4.87578	169.843	●	PBANKA_0707400	1603	PBANKA_0707300	1793
PbANKA_07_v3	309987	312639	2653	310513	482	183.263	5.3028	180.478		PBANKA_0707500	1831
PbANKA_07_v3	312744	314139	1396	313256	495	200.845	5.69463	197.316	●
PbANKA_07_v3	339039	340468	1430	339650	410	106.845	3.72292	104.987	●	PBANKA_0708200	557	PBANKA_0708400	1007
PbANKA_07_v3	348201	349345	1145	348775	496	169.714	4.76421	167.256	●
PbANKA_07_v3	360336	361726	1391	360807	499	176.349	4.92037	173.752	●
PbANKA_07_v3	369016	371468	2453	370951	500	156.491	4.3775	154.241	●	PBANKA_0709600	1694
PbANKA_07_v3	385142	386049	908	385440	296	59.0293	3.03357	57.4565
PbANKA_07_v3	401984	402558	575	402238	363	86.664	3.46684	84.9241	●	PBANKA_0710400	1633
PbANKA_07_v3	405586	407026	1441	406673	412	121.506	4.13288	119.56	●	PBANKA_0710600	495	PBANKA_0710500	2512
PbANKA_07_v3	418448	420113	1666	418816	497	207.365	5.87707	203.492	●
PbANKA_07_v3	456771	459200	2430	457457	368	71.9997	3.01096	70.3438	●	PBANKA_0711900	794	PBANKA_0712000	2024
PbANKA_07_v3	465771	467094	1324	466265	447	154.998	4.81677	152.767	●
PbANKA_07_v3	468650	471256	2607	470302	495	166.819	4.69385	164.413	●
PbANKA_07_v3	471581	473779	2199	472603	413	122.667	4.15905	120.713	●	PBANKA_0712300	716	PBANKA_0712400	3232
PbANKA_07_v3	476571	478037	1467	477400	317	63.0516	3.0336	61.4519	●
PbANKA_07_v3	479531	480567	1037	480121	416	128.163	4.29855	126.171	●	PBANKA_0712500	941
PbANKA_07_v3	481582	485823	4242	484963	498	176.819	4.94338	174.212	●
PbANKA_07_v3	490618	493480	2863	492390	498	141.055	4.00551	138.967	●	PBANKA_0712900	1217	PBANKA_0712800	2914
PbANKA_07_v3	495431	496008	578	495671	330	71.9563	3.23578	70.3007	●	PBANKA_0713000	388	PBANKA_0713100	1123
PbANKA_07_v3	504053	505175	1123	504768	465	169.04	5.05619	166.594	●	PBANKA_0713200	445
PbANKA_07_v3	511572	513158	1587	512586	491	174.856	4.95693	172.293	●
PbANKA_07_v3	532286	533404	1119	532988	397	108.389	3.86524	106.522	●	PBANKA_0714000	372	PBANKA_0713900	1328
PbANKA_07_v3	579360	579901	542	579638	448	156.286	4.84599	154.038	●
PbANKA_07_v3	591742	592918	1177	592200	499	127.345	3.6749	125.358	●	PBANKA_0716000	336
PbANKA_07_v3	597956	599217	1262	598398	482	152.904	4.4293	150.699	●	PBANKA_0716100	927
PbANKA_07_v3	610334	611557	1224	610605	438	133.56	4.26342	131.529	●
PbANKA_07_v3	612844	614248	1405	613639	497	169.003	4.73547	166.558	●	PBANKA_0716700	207	PBANKA_0716600	832
PbANKA_07_v3	621912	622463	552	622149	372	75.789	3.09475	74.1108	●	PBANKA_0717000	244	PBANKA_0717100	434
PbANKA_07_v3	636799	637660	862	637180	497	178.775	5.00886	176.119	●
PbANKA_07_v3	642251	645587	3337	643015	495	133.199	3.83588	131.172	●	PBANKA_0717800	696
PbANKA_07_v3	670098	671562	1465	670665	497	165.444	4.63867	163.062	●	PBANKA_0718700	721	PBANKA_0718800	803
PbANKA_07_v3	679067	681015	1949	680027	492	160.772	4.55627	158.464	●	PBANKA_0719100	395	PBANKA_0718900	1089
PbANKA_07_v3	749181	752921	3741	750047	467	166.428	4.95535	164.029	●	PBANKA_0720400	1238	PBANKA_0720500	4365
PbANKA_07_v3	763622	765536	1915	764334	498	175.652	4.91053	173.072	●	PBANKA_0720900	341
PbANKA_07_v3	766222	767729	1508	766923	498	186.521	5.2229	183.635	●	PBANKA_0721000	917
PbANKA_07_v3	783854	784715	862	784204	452	153.595	4.72307	151.383	●
PbANKA_07_v3	784939	786569	1631	785348	500	172.452	4.80255	169.94	●
PbANKA_07_v3	787755	792414	4660	790623	498	183.571	5.13667	180.776		PBANKA_0721800	1669
PbANKA_08_v3	52840	55337	2498	53708	487	155.142	4.44761	152.91	●	PBANKA_0801100	1142	PBANKA_0801200	2188
PbANKA_08_v3	146232	148590	2359	147059	489	201.55	5.7942	197.983	●
PbANKA_08_v3	176427	177409	983	177027	403	126.938	4.38347	124.954	●	PBANKA_0803100	2025
PbANKA_08_v3	206992	207722	731	207236	300	83.3246	3.89352	81.6036	●	PBANKA_0803700	407	PBANKA_0803800	630
PbANKA_08_v3	210832	212729	1898	211729	490	176.225	5.00647	173.63	●	PBANKA_0804000	889
PbANKA_08_v3	218602	219606	1005	218899	381	93.5811	3.54702	91.8019	●	PBANKA_0804100	1094	PBANKA_0804200	2571
PbANKA_08_v3	227121	228111	991	227311	347	77.4098	3.29327	75.7221	●
PbANKA_08_v3	229106	229652	547	229456	331	67.3166	3.08275	65.6894	●
PbANKA_08_v3	278229	279482	1254	279219	338	68.9149	3.08963	67.2778	●	PBANKA_0805700	647
PbANKA_08_v3	291244	292425	1182	291611	399	128.412	4.47111	126.419	●	PBANKA_0805900	397
PbANKA_08_v3	365983	367649	1667	366442	400	130.111	4.51638	128.106	●	PBANKA_0807500	1053
PbANKA_08_v3	391130	394187	3058	392296	486	192.671	5.54828	189.552	●	PBANKA_0808000	2858
PbANKA_08_v3	412985	415066	2082	414057	496	182.6	5.12946	179.837	●
PbANKA_08_v3	435029	436403	1375	435484	341	105.164	4.28174	103.316	●
PbANKA_08_v3	441853	442670	818	442268	489	208.49	6.02264	204.538	●
PbANKA_08_v3	453879	455297	1419	454232	293	58.7808	3.04494	57.2099	●	PBANKA_0809700	537
PbANKA_08_v3	481027	482531	1505	481731	497	204.49	5.78486	200.794	●	PBANKA_0810700	717
PbANKA_08_v3	487843	489497	1655	488750	418	123.839	4.15085	121.877	●	PBANKA_0810900	1396	PBANKA_0810800	1904
PbANKA_08_v3	498822	499280	459	499041	320	91.8688	4.01204	90.0994	●
PbANKA_08_v3	533745	534309	565	534069	342	102.712	4.18114	100.877	●	PBANKA_0811900	15
PbANKA_08_v3	566835	568544	1710	567539	488	179.334	5.11823	176.664	●	PBANKA_0812600	330	PBANKA_0812700	1742
PbANKA_08_v3	570363	571229	867	571004	338	93.909	3.90724	92.1278	●	PBANKA_0812800	35
PbANKA_08_v3	575052	576012	961	575589	499	183.518	5.1247	180.725	●	PBANKA_0812900	780
PbANKA_08_v3	583138	583836	699	583374	339	99.369	4.09153	97.5554	●	PBANKA_0813100	59
PbANKA_08_v3	597235	599003	1769	597980	496	178.965	5.0244	176.304	●	PBANKA_0813700	240
PbANKA_08_v3	611219	611994	776	611739	312	68.677	3.25309	67.0413	●
PbANKA_08_v3	644602	646143	1542	645697	449	160.144	4.9552	157.844	●	PBANKA_0815400	338	PBANKA_0815300	2085
PbANKA_08_v3	655041	656720	1680	656169	484	182.998	5.272	180.224	●	PBANKA_0815700	614
PbANKA_08_v3	659724	661385	1662	660427	492	189.17	5.36881	186.188	●	PBANKA_0815800	494	PBANKA_0815900	995
PbANKA_08_v3	665619	667491	1873	666742	452	156.452	4.80942	154.202	●	PBANKA_0816000	1355
PbANKA_08_v3	694377	696879	2503	695169	488	202.933	5.85248	199.307	●	PBANKA_0817000	1011	PBANKA_0817100	1310
PbANKA_08_v3	701600	702805	1206	702375	492	205.523	5.88371	201.775	●
PbANKA_08_v3	707456	708299	844	707879	323	83.4707	3.67711	81.7488	●
PbANKA_08_v3	754530	755410	881	754930	404	118.865	4.12247	116.936	●	PBANKA_0818900	478
PbANKA_08_v3	760477	761975	1499	761168	424	142.936	4.67991	140.831	●	PBANKA_0819000	567	PBANKA_0819100	2142
PbANKA_08_v3	766279	767712	1434	767447	369	89.9561	3.52398	88.1978	●	PBANKA_0819200	1051
PbANKA_08_v3	775245	776606	1362	776091	386	119.975	4.3258	118.038	●	PBANKA_0819500	3787
PbANKA_08_v3	787857	790049	2193	788743	497	159.629	4.48356	157.337	●	PBANKA_0819700	818	PBANKA_0819800	1644
PbANKA_08_v3	829800	830270	471	830043	281	70.1005	3.56218	68.456	●	PBANKA_0820800	1415	PBANKA_0820900	1893
PbANKA_08_v3	839167	840582	1416	839783	500	180.594	5.0305	177.891	●	PBANKA_0821200	281	PBANKA_0821100	565
PbANKA_08_v3	852219	854117	1899	853249	499	178.698	4.98664	176.044	●	PBANKA_0821600	993
PbANKA_08_v3	857929	858778	850	858264	424	132.479	4.356	130.457	●	PBANKA_0821700	251	PBANKA_0821800	718
PbANKA_08_v3	859129	859574	446	859375	296	64.4246	3.2225	62.8159
PbANKA_08_v3	860892	866102	5211	862202	497	176.706	4.95003	174.101	●	PBANKA_0821900	270	PBANKA_0822000	1332
PbANKA_08_v3	888529	889627	1099	889016	486	151.712	4.36462	149.521	●	PBANKA_0822700	532	PBANKA_0822800	743
PbANKA_08_v3	904340	905701	1362	904895	496	182.6	5.12946	179.837	●	PBANKA_0823200	256
PbANKA_08_v3	914215	915779	1565	915005	481	145.337	4.23648	143.21	●	PBANKA_0823500	347
PbANKA_08_v3	949494	952439	2946	950434	497	191.223	5.37386	188.16	●	PBANKA_0824400	1879
PbANKA_08_v3	964500	966441	1942	965894	499	172.898	4.82419	170.376	●	PBANKA_0824900	64	PBANKA_0824800	2819
PbANKA_08_v3	974876	975400	525	975116	391	121.698	4.33264	119.75	●
PbANKA_08_v3	975700	976502	803	976096	326	76.7829	3.42262	75.099	●
PbANKA_08_v3	982483	983969	1487	982731	403	122.019	4.22856	120.068	●
PbANKA_08_v3	986971	988344	1374	987844	492	180.967	5.12388	178.252	●	PBANKA_0825500	739	PBANKA_0825400	943
PbANKA_08_v3	996833	997428	596	997067	326	79.1694	3.50309	77.4716	●	PBANKA_0825700	395
PbANKA_08_v3	1002362	1003440	1079	1002796	310	70.3628	3.32567	68.7166	●	PBANKA_0825900	589	PBANKA_0826000	1744
PbANKA_08_v3	1012606	1013914	1309	1013631	315	64.3735	3.08914	62.7651		PBANKA_0826400	257
PbANKA_08_v3	1014638	1015514	877	1015009	391	122.271	4.35131	120.319	●
PbANKA_08_v3	1031657	1032475	819	1032059	437	151.807	4.82306	149.615	●
PbANKA_08_v3	1032606	1033786	1181	1033432	500	208.239	5.86573	204.305	●
PbANKA_08_v3	1042596	1044358	1763	1043183	374	85.4077	3.35577	83.6749	●	PBANKA_0826900	866	PBANKA_0827000	3075
PbANKA_08_v3	1061537	1062708	1172	1061832	477	162.057	4.72743	159.73	●	PBANKA_0827300	256	PBANKA_0827400	2754
PbANKA_08_v3	1081231	1086187	4957	1081826	498	167.751	4.69226	165.328		PBANKA_0827900	1794	PBANKA_0828000	5155
PbANKA_08_v3	1090957	1092588	1632	1091705	499	181.994	5.08074	179.252	●	PBANKA_0828100	922
PbANKA_08_v3	1099092	1101543	2452	1101120	498	186.521	5.2229	183.635	●	PBANKA_0828400	699	PBANKA_0828300	1519
PbANKA_08_v3	1107059	1107758	700	1107487	456	178.09	5.45077	175.453	●
PbANKA_08_v3	1116580	1117138	559	1116848	441	151.446	4.76957	149.258	●
PbANKA_08_v3	1123249	1125401	2153	1124202	499	149.98	4.21938	147.809	●	PBANKA_0829400	1086
PbANKA_08_v3	1143573	1145007	1435	1144209	358	80.9502	3.32824	79.2425	●	PBANKA_0830200	876
PbANKA_08_v3	1158781	1160120	1340	1159774	479	164.536	4.77913	162.169	●
PbANKA_08_v3	1180121	1180751	631	1180495	418	105.052	3.61832	103.204	●
PbANKA_08_v3	1189959	1191405	1447	1191157	419	108.789	3.71358	106.92	●	PBANKA_0831500	847
PbANKA_08_v3	1210335	1211310	976	1210695	374	93.5007	3.59472	91.722	●	PBANKA_0831600	229
PbANKA_08_v3	1229438	1230290	853	1230016	346	74.8748	3.22203	73.202	●
PbANKA_08_v3	1235269	1236039	771	1235685	489	140.287	4.04848	138.205	●	PBANKA_0832600	943
PbANKA_08_v3	1249699	1250736	1038	1250344	498	156.202	4.3859	153.956	●	PBANKA_0833100	585
PbANKA_08_v3	1279330	1280063	734	1279711	429	125.783	4.11529	123.807	●	PBANKA_0834200	427
PbANKA_08_v3	1288395	1290802	2408	1289121	495	155.267	4.38556	153.034	●	PBANKA_0834400	1365
PbANKA_09_v3	46109	46912	804	46555	377	100.831	3.79546	99.0081	●	PBANKA_0901700	427
PbANKA_09_v3	62131	66367	4237	62770	499	219.487	6.24929	214.509	●	PBANKA_0901900	947	PBANKA_0902000	1588
PbANKA_09_v3	78842	83437	4596	82767	498	186.521	5.2229	183.635	●	PBANKA_0902300	665	PBANKA_0902200	1607
PbANKA_09_v3	91722	92822	1101	92375	486	186.06	5.34276	183.189	●	PBANKA_0902400	184
PbANKA_09_v3	99740	100726	987	100088	394	116.378	4.13436	114.464	●	PBANKA_0902500	464
PbANKA_09_v3	107159	108649	1491	107751	499	167.332	4.67199	164.917	●	PBANKA_0902900	258
PbANKA_09_v3	133267	134165	899	133790	317	73.202	3.37011	71.5391	●	PBANKA_0903700	209
PbANKA_09_v3	136277	137298	1022	136944	290	76.5424	3.72915	74.8598	●	PBANKA_0903800	1591
PbANKA_09_v3	158632	160027	1396	159240	491	149.739	4.27364	147.569	●	PBANKA_0904400	945
PbANKA_09_v3	177686	178868	1183	178423	292	66.936	3.34452	65.3113	●
PbANKA_09_v3	180625	182032	1408	181311	500	168.007	4.68133	165.581	●
PbANKA_09_v3	187125	189348	2224	187699	498	195.924	5.505	192.656	●
PbANKA_09_v3	190084	192406	2323	191264	500	170.211	4.74117	167.744	●
PbANKA_09_v3	213491	215171	1681	214813	388	111.079	4.02181	109.196	●	PBANKA_0906600	441
PbANKA_09_v3	216774	218108	1335	217688	500	201.168	5.64266	197.617	●
PbANKA_09_v3	238533	239126	594	238799	310	79.2403	3.6412	77.5422	●	PBANKA_0907100	506	PBANKA_0907000	847
PbANKA_09_v3	245684	246809	1126	246248	264	54.0551	3.07829	52.5172	●
PbANKA_09_v3	252774	254730	1957	254271	360	95.0627	3.75197	93.2745	●	PBANKA_0907700	575	PBANKA_0907600	638
PbANKA_09_v3	257094	258710	1617	257372	468	189.725	5.68199	186.722	●
PbANKA_09_v3	278733	279539	807	279119	498	212.571	6.03311	208.257	●
PbANKA_09_v3	302162	303018	857	302449	298	60.3152	3.06457	58.7336	●	PBANKA_0908500	706
PbANKA_09_v3	315758	316770	1013	316191	470	152.26	4.51497	150.063	●	PBANKA_0909100	150	PBANKA_0909200	873
PbANKA_09_v3	328409	330419	2011	329767	499	211.863	5.99624	207.603	●	PBANKA_0909500	348	PBANKA_0909400	1600
PbANKA_09_v3	332509	334099	1591	333561	455	164.964	5.04	162.59	●	PBANKA_0909600	6843
PbANKA_09_v3	334285	337950	3666	337240	497	200.279	5.65186	196.778	●	PBANKA_0909600	3164
PbANKA_09_v3	355799	356245	447	356007	238	49.2692	3.09153	47.766		PBANKA_0909800	746	PBANKA_0909900	4194
PbANKA_09_v3	375003	376662	1660	375945	500	189.236	5.28116	186.253	●
PbANKA_09_v3	379627	381773	2147	380335	456	148.249	4.5273	146.095	●	PBANKA_0910200	1122	PBANKA_0910300	3403
PbANKA_09_v3	420689	421242	554	421033	282	61.2062	3.2118	59.6184	●	PBANKA_0911300	379
PbANKA_09_v3	427786	428693	908	428297	350	102.479	4.09092	100.647	●	PBANKA_0911500	399
PbANKA_09_v3	465335	466346	1012	465660	458	142.408	4.3437	140.308	●	PBANKA_0912300	168	PBANKA_0912400	2112
PbANKA_09_v3	472315	473676	1362	472911	494	188.697	5.33177	185.735	●	PBANKA_0912500	433
PbANKA_09_v3	540239	541196	958	540961	274	58.7582	3.18197	57.1874	●	PBANKA_0914100	1143
PbANKA_09_v3	554339	556175	1837	555596	473	158.526	4.66451	156.249	●	PBANKA_0914400	1981
PbANKA_09_v3	564201	565211	1011	564711	469	153.702	4.56448	151.487	●	PBANKA_0914600	506
PbANKA_09_v3	590179	592202	2024	591428	498	209.236	5.92428	205.226	●
PbANKA_09_v3	593470	594451	982	593910	497	187.056	5.24954	184.154	●	PBANKA_0915600	259
PbANKA_09_v3	641088	642533	1446	641936	495	179.458	5.04876	176.784	●	PBANKA_0916900	183
PbANKA_09_v3	656710	658489	1780	657722	494	157.664	4.45655	155.399	●	PBANKA_0917400	813	PBANKA_0917500	1408
PbANKA_09_v3	659010	659595	586	659228	319	83.3864	3.70991	81.6652	●
PbANKA_09_v3	664441	665147	707	664748	315	81.3138	3.67144	79.6041	●
PbANKA_09_v3	674084	675293	1210	674568	405	114.042	3.96896	112.142	●	PBANKA_0917900	874
PbANKA_09_v3	678130	679316	1187	678622	350	80.0284	3.35381	78.3257		PBANKA_0918100	713	PBANKA_0918000	1427
PbANKA_09_v3	695689	696422	734	696040	299	63.3372	3.16237	61.7356	●	PBANKA_0918600	849
PbANKA_09_v3	735358	737218	1861	736292	500	189.236	5.28116	186.253
PbANKA_09_v3	741230	742569	1340	741534	434	157.43	5.03724	155.168	●
PbANKA_09_v3	748810	749491	682	749063	347	82.3495	3.44749	80.634	●	PBANKA_0920300	841
PbANKA_09_v3	766046	766879	834	766532	400	130.926	4.54316	128.915	●
PbANKA_09_v3	773571	774180	610	773934	397	111.861	3.96937	109.974	●	PBANKA_0921000	627	PBANKA_0921100	802
PbANKA_09_v3	830280	831957	1678	831428	487	164.151	4.69312	161.79	●
PbANKA_09_v3	840762	841714	953	841487	397	119.576	4.20739	117.642	●
PbANKA_09_v3	862399	863189	791	862706	483	169.513	4.88298	167.059	●	PBANKA_0924000	205	PBANKA_0924100	3044
PbANKA_09_v3	874391	876282	1892	875254	366	77.2244	3.16927	75.5378		PBANKA_0924300	871
PbANKA_09_v3	895948	896773	826	896420	447	127.493	4.02118	125.506	●	PBANKA_0924900	1295
PbANKA_09_v3	898738	899803	1066	899022	426	103.214	3.51815	101.377	●	PBANKA_0925000	138
PbANKA_09_v3	937430	938130	701	937796	475	190.153	5.60515	187.132	●
PbANKA_09_v3	958758	960500	1743	959398	499	164.1	4.58519	161.739	●	PBANKA_0925800	1
PbANKA_09_v3	992314	993702	1389	992801	490	142.497	4.09674	140.396	●	PBANKA_0926800	317
PbANKA_09_v3	996547	998891	2345	997997	494	166.417	4.69188	164.017	●	PBANKA_0926900	1275	PBANKA_0927000	1593
PbANKA_09_v3	1014845	1016175	1331	1015514	495	143.743	4.09235	141.631	●	PBANKA_0927500	792	PBANKA_0927600	899
PbANKA_09_v3	1064860	1065362	503	1065151	348	98.9663	3.98835	97.1551	●	PBANKA_0928800	111	PBANKA_0928700	1615
PbANKA_09_v3	1073312	1075574	2263	1073973	498	169.962	4.75261	167.5	●	PBANKA_0929300	179	PBANKA_0929200	406
PbANKA_09_v3	1076027	1077992	1966	1077556	488	190.48	5.45564	187.446	●
PbANKA_09_v3	1110952	1111770	819	1111314	441	141.497	4.46838	139.405	●	PBANKA_0930300	18
PbANKA_09_v3	1133111	1134244	1134	1133601	401	125.996	4.37299	124.019	●	PBANKA_0931100	355
PbANKA_09_v3	1143379	1144234	856	1143860	432	117.826	3.86895	115.903	●	PBANKA_0931300	1078
PbANKA_09_v3	1185636	1187801	2166	1187371	476	183.578	5.38259	180.784	●	PBANKA_0932600	238	PBANKA_0932500	2472
PbANKA_09_v3	1204073	1204678	606	1204356	482	202.314	5.91329	198.713	●
PbANKA_09_v3	1227107	1228016	910	1227592	394	97.0064	3.55624	95.2068	●	PBANKA_0933800	220
PbANKA_09_v3	1229737	1230435	699	1230104	325	80.1216	3.54365	78.4185	●
PbANKA_09_v3	1243404	1245323	1920	1244941	390	92.5715	3.45717	90.7981	●	PBANKA_0934400	947	PBANKA_0934500	3215
PbANKA_09_v3	1271955	1272717	763	1272469	404	145.096	4.9779	142.972	●	PBANKA_0934800	602
PbANKA_09_v3	1279485	1280400	916	1279906	303	60.3196	3.03188	58.7379	●
PbANKA_09_v3	1286370	1287327	958	1286885	496	165.313	4.64396	162.933	●
PbANKA_09_v3	1298449	1299662	1214	1298785	360	98.8331	3.87434	97.0227	●	PBANKA_0935600	292
PbANKA_09_v3	1308609	1310702	2094	1309210	491	174.269	4.94013	171.719	●	PBANKA_0936000	1107	PBANKA_0936100	1110
PbANKA_09_v3	1333415	1334922	1508	1333935	495	180.666	5.0837	177.961	●	PBANKA_0937100	664
PbANKA_09_v3	1358025	1358735	711	1358400	365	91.5422	3.60171	89.7749	●	PBANKA_0937800	448	PBANKA_0937700	2941
PbANKA_09_v3	1364156	1365324	1169	1364914	435	156.225	4.98643	153.978	●	PBANKA_0938000	579
PbANKA_09_v3	1376827	1379207	2381	1377663	500	166.918	4.65198	164.51	●	PBANKA_0938400	1662
PbANKA_09_v3	1388212	1388910	699	1388662	352	107.754	4.25662	105.891	●	PBANKA_0938700	515
PbANKA_09_v3	1391263	1392933	1671	1392505	496	188.875	5.31466	185.905	●	PBANKA_0938800	1293
PbANKA_09_v3	1408373	1409519	1147	1409301	278	60.4755	3.21569	58.8927	●	PBANKA_0939100	424
PbANKA_09_v3	1425115	1425983	869	1425584	312	63.5107	3.08015	61.9081	●	PBANKA_0939500	472
PbANKA_09_v3	1426860	1430400	3541	1427393	495	185.607	5.22845	182.75	●	PBANKA_0939600	3974
PbANKA_09_v3	1443474	1444191	718	1443981	238	52.9631	3.25278	51.4331	●
PbANKA_09_v3	1453006	1454764	1759	1453834	497	174.956	4.90069	172.391	●	PBANKA_0940000	324
PbANKA_09_v3	1493825	1494355	531	1494087	365	83.4342	3.35636	81.7126	●	PBANKA_0941300	598	PBANKA_0941200	2126
PbANKA_09_v3	1509829	1513767	3939	1511134	489	192.558	5.5083	189.443	●	PBANKA_0941800	587	PBANKA_0941900	2485
PbANKA_09_v3	1540281	1541833	1553	1541600	375	125.164	4.62145	123.192	●	PBANKA_0942700	35
PbANKA_09_v3	1549290	1550305	1016	1549686	473	181.05	5.33857	178.333	●	PBANKA_0942900	1052
PbANKA_09_v3	1570985	1572183	1199	1571671	500	209.694	5.91247	205.635	●	PBANKA_0943400	534	PBANKA_0943300	1826
PbANKA_09_v3	1583491	1584385	895	1583856	384	104.951	3.86575	103.104	●	PBANKA_0943600	270	PBANKA_0943500	3660
PbANKA_10_v3	67954	68401	448	68166	346	70.3862	3.08655	68.7399
PbANKA_10_v3	85134	86449	1316	85786	497	190.898	5.36409	187.846	●	PBANKA_1001100	1360
PbANKA_10_v3	139097	140265	1169	139767	497	194.844	5.48375	191.629	●	PBANKA_1002100	966
PbANKA_10_v3	176508	178076	1569	177059	491	177.828	5.04271	175.197	●	PBANKA_1002800	954	PBANKA_1002900	2361
PbANKA_10_v3	215606	217368	1763	216700	342	85.5915	3.59009	83.8577	●	PBANKA_1003500	1344	PBANKA_1003400	1742
PbANKA_10_v3	225393	226615	1223	226042	495	178.26	5.01429	175.617	●
PbANKA_10_v3	245744	246543	800	245922	264	63.9513	3.47567	62.3458	●
PbANKA_10_v3	277873	279702	1830	278242	474	174.844	5.13503	172.281	●	PBANKA_1005300	93	PBANKA_1005400	1970
PbANKA_10_v3	305942	306735	794	306405	398	108.982	3.87495	107.112	●	PBANKA_1006100	1013	PBANKA_1006200	2058
PbANKA_10_v3	307025	307462	438	307255	251	50.5811	3.04057	49.0684		PBANKA_1006200	1208	PBANKA_1006100	1863
PbANKA_10_v3	330889	331307	419	331097	261	63.3072	3.47791	61.7059	●
PbANKA_10_v3	366108	366701	594	366339	346	92.6929	3.7928	90.9189	●	PBANKA_1007800	806	PBANKA_1007700	1597
PbANKA_10_v3	405524	406272	749	405862	357	91.7231	3.66929	89.9547	●	PBANKA_1008700	1101
PbANKA_10_v3	413983	415688	1706	415152	492	169.221	4.78785	166.773	●	PBANKA_1009100	1078	PBANKA_1009000	1911
PbANKA_10_v3	431152	433463	2312	432057	498	167.751	4.69226	165.328	●	PBANKA_1009500	1576
PbANKA_10_v3	489791	491600	1810	490453	491	150.714	4.29886	148.534	●	PBANKA_1010600	1148	PBANKA_1010500	1896
PbANKA_10_v3	512793	513756	964	513389	370	99.2353	3.80253	97.4224	●
PbANKA_10_v3	576269	577398	1130	576733	490	194.928	5.57028	191.708	●
PbANKA_10_v3	604281	605081	801	604621	479	168.238	4.8859	165.808	●	PBANKA_1013200	623	PBANKA_1013300	1379
PbANKA_10_v3	614977	615452	476	615191	360	86.499	3.48307	84.7601	●	PBANKA_1013500	353
PbANKA_10_v3	632292	633089	798	632550	383	111.19	4.06956	109.307	●	PBANKA_1014300	214	PBANKA_1014400	1055
PbANKA_10_v3	658369	659363	995	658630	378	93.4338	3.56386	91.6556	●	PBANKA_1014900	634	PBANKA_1015000	1127
PbANKA_10_v3	672640	673862	1223	673105	498	175.652	4.91053	173.072	●	PBANKA_1015400	280	PBANKA_1015300	911
PbANKA_10_v3	676211	677287	1077	676741	338	66.4698	3.0154	64.8478	●	PBANKA_1015500	974
PbANKA_10_v3	685382	686217	836	685978	379	105.418	3.92192	103.568	●	PBANKA_1015800	49
PbANKA_10_v3	702680	704362	1683	703804	498	120.616	3.52748	118.675	●	PBANKA_1016300	290	PBANKA_1016200	2747
PbANKA_10_v3	708729	709675	947	709460	332	66.2711	3.04431	64.6504	●	PBANKA_1016500	26	PBANKA_1016400	1609
PbANKA_10_v3	728752	729247	496	729022	321	66.7332	3.12715	65.1097	●
PbANKA_10_v3	755728	756255	528	756006	451	151.162	4.66015	148.978	●
PbANKA_10_v3	759496	760023	528	759758	428	129.545	4.23293	127.543	●
PbANKA_10_v3	768157	768649	493	768403	403	108.966	3.83547	107.095	●
PbANKA_10_v3	771489	772517	1029	772131	494	153.623	4.35074	151.41	●	PBANKA_1018100	463
PbANKA_10_v3	785585	786456	872	785932	475	156.366	4.58516	154.118	●	PBANKA_1018700	1117
PbANKA_10_v3	788350	789460	1111	788986	497	180.665	5.06303	177.96	●
PbANKA_10_v3	790823	791916	1094	791316	446	149.318	4.65396	147.153	●	PBANKA_1018800	98
PbANKA_10_v3	808295	809888	1594	808831	392	108.855	3.9195	106.985	●	PBANKA_1019400	490	PBANKA_1019500	1199
PbANKA_10_v3	824141	825555	1415	825167	422	141.586	4.65788	139.493	●
PbANKA_10_v3	837817	838932	1116	838364	495	193.357	5.46173	190.208	●	PBANKA_1020000	269
PbANKA_10_v3	853951	854416	466	854174	322	79.9751	3.56335	78.2729	●
PbANKA_10_v3	867757	868832	1076	868412	355	81.6325	3.36897	79.921	●	PBANKA_1020900	481
PbANKA_10_v3	875890	877003	1114	876520	496	170.837	4.79525	168.357	●	PBANKA_1021200	291
PbANKA_10_v3	883840	884253	414	884060	304	68.4474	3.30446	66.8131	●
PbANKA_10_v3	896712	899403	2692	898957	496	186.331	5.239	183.451	●	PBANKA_1022300	296
PbANKA_10_v3	909400	910721	1322	909785	339	76.8213	3.32926	75.1369	●
PbANKA_10_v3	945766	947998	2233	947443	496	157.946	4.44752	155.676	●	PBANKA_1023800	82
PbANKA_10_v3	953240	954651	1412	954025	490	154.045	4.39382	151.826	●
PbANKA_10_v3	954811	956759	1949	956198	354	75.0274	3.1768	73.3537		PBANKA_1023900	1044	PBANKA_1024000	1078
PbANKA_10_v3	976084	980785	4702	979359	499	194.669	5.45507	191.466	●
PbANKA_10_v3	1054378	1056081	1704	1055184	499	159.908	4.47436	157.612	●	PBANKA_1025500	1549
PbANKA_10_v3	1064927	1066562	1636	1065562	497	187.056	5.24954	184.154	●	PBANKA_1026000	159	PBANKA_1025900	526
PbANKA_10_v3	1080037	1081567	1531	1080783	492	164.794	4.66546	162.422	●	PBANKA_1026300	324	PBANKA_1026200	1244
PbANKA_10_v3	1094602	1095789	1188	1095458	410	102.108	3.59112	100.277	●	PBANKA_1026600	707
PbANKA_10_v3	1104326	1105405	1080	1104669	291	60.59	3.1225	59.0064	●	PBANKA_1026900	545	PBANKA_1027000	1077
PbANKA_10_v3	1116401	1119049	2649	1117649	499	192.369	5.38563	189.261	●
PbANKA_10_v3	1138225	1139133	909	1138649	459	146.078	4.43826	143.944	●	PBANKA_1028000	1115
PbANKA_10_v3	1143145	1144604	1460	1143746	490	202.642	5.81648	199.025	●
PbANKA_10_v3	1160811	1163507	2697	1163234	346	76.8875	3.2838	75.2028	●	PBANKA_1028500	708	PBANKA_1028400	2866
PbANKA_10_v3	1164546	1165788	1243	1165109	487	191.401	5.49625	188.33	●
PbANKA_10_v3	1168541	1171810	3270	1170245	379	100.548	3.7708	98.7264		PBANKA_1028700	1342	PBANKA_1028600	2433
PbANKA_10_v3	1173515	1174078	564	1173806	337	96.4138	4.00561	94.6178	●
PbANKA_10_v3	1192220	1193525	1306	1192566	477	182.852	5.34803	180.082	●
PbANKA_10_v3	1226614	1227489	876	1226889	276	58.3153	3.14974	56.7477	●	PBANKA_1030300	920
PbANKA_10_v3	1315663	1317470	1808	1316218	500	198.771	5.56854	195.359	●	PBANKA_1032400	289	PBANKA_1032500	1615
PbANKA_10_v3	1322851	1324318	1468	1323607	439	150.919	4.77408	148.737	●	PBANKA_1032600	2012
PbANKA_10_v3	1326529	1327891	1363	1327421	464	143.287	4.31771	141.179	●	PBANKA_1032700	1380	PBANKA_1032800	2254
PbANKA_10_v3	1355161	1355911	751	1355505	490	180.764	5.13917	178.056	●	PBANKA_1033600	954
PbANKA_10_v3	1393076	1395902	2827	1394724	492	197.53	5.62746	194.184	●	PBANKA_1034200	1900	PBANKA_1034300	3832
PbANKA_10_v3	1405468	1406483	1016	1405705	340	78.5794	3.37814	76.8851	●	PBANKA_1034400	260
PbANKA_10_v3	1418584	1419848	1265	1419258	409	111.236	3.85536	109.352	●	PBANKA_1034800	461	PBANKA_1034700	469
PbANKA_10_v3	1428736	1429973	1238	1429034	323	81.3056	3.60121	79.5959		PBANKA_1035100	500
PbANKA_10_v3	1434042	1435673	1632	1434692	499	204.604	5.76289	200.902	●	PBANKA_1035200	912
PbANKA_10_v3	1437918	1439458	1541	1438389	366	97.7288	3.78775	95.925	●	PBANKA_1035400	1074	PBANKA_1035300	1871
PbANKA_10_v3	1483710	1486606	2897	1484385	473	187.661	5.54961	184.737	●	PBANKA_1036600	2272
PbANKA_10_v3	1527879	1529101	1223	1528736	480	201.82	5.92431	198.236	●
PbANKA_10_v3	1540522	1541633	1112	1540828	322	77.5313	3.47912	75.8429	●
PbANKA_10_v3	1552117	1552889	773	1552464	436	168.133	5.37121	165.704	●	PBANKA_1038800	565
PbANKA_10_v3	1574122	1575863	1742	1575364	374	94.2764	3.61814	92.4931	●	PBANKA_1039400	346
PbANKA_10_v3	1584964	1585820	857	1585506	392	116.067	4.14271	114.155	●	PBANKA_1039700	956
PbANKA_10_v3	1599232	1600307	1076	1599718	482	135.806	3.98509	133.759	●	PBANKA_1040100	1271	PBANKA_1040200	5921
PbANKA_11_v3	65465	65961	497	65738	406	125.877	4.32104	123.9	●	PBANKA_1100900	573	PBANKA_1100860	2702
PbANKA_11_v3	103246	103897	652	103632	317	67.6058	3.18222	65.9769	●
PbANKA_11_v3	110055	111065	1011	110711	420	135.213	4.4777	133.171	●	PBANKA_1102100	1309
PbANKA_11_v3	116864	117408	545	117140	380	110.054	4.06029	108.177	●
PbANKA_11_v3	135145	136960	1816	136463	432	148.768	4.78044	146.608	●	PBANKA_1103100	606	PBANKA_1103000	2375
PbANKA_11_v3	156969	158626	1658	158062	355	98.0061	3.89118	96.2006	●
PbANKA_11_v3	169696	170360	665	170084	313	80.7498	3.66907	79.0432	●	PBANKA_1104200	348
PbANKA_11_v3	220767	223006	2240	222368	484	161.042	4.63418	158.73	●	PBANKA_1105200	78	PBANKA_1105100	2292
PbANKA_11_v3	225629	227811	2183	226162	500	171.888	4.78706	169.389	●	PBANKA_1105300	91
PbANKA_11_v3	237654	239708	2055	238879	494	172.875	4.87116	170.354	●	PBANKA_1106000	539	PBANKA_1106100	1297
PbANKA_11_v3	251601	253026	1426	252574	498	179.481	5.01892	176.806	●	PBANKA_1106300	158	PBANKA_1106200	1396
PbANKA_11_v3	265453	266724	1272	266103	489	146.313	4.20083	144.177	●	PBANKA_1106700	782
PbANKA_11_v3	269270	270016	747	269543	427	132.42	4.32685	130.398	●	PBANKA_1106800	301
PbANKA_11_v3	274090	275496	1407	274889	490	171.255	4.86412	168.768	●	PBANKA_1107000	244
PbANKA_11_v3	278240	279249	1010	278565	328	65.8397	3.05489	64.2219	●	PBANKA_1107100	876	PBANKA_1107200	2253
PbANKA_11_v3	285424	287614	2191	286548	382	95.4777	3.59576	93.6871	●	PBANKA_1107300	1232	PBANKA_1107400	2167
PbANKA_11_v3	291659	292801	1143	291926	438	148.016	4.69444	145.864	●	PBANKA_1107500	884
PbANKA_11_v3	306774	308559	1786	307553	499	150.939	4.24357	148.757	●	PBANKA_1108000	297
PbANKA_11_v3	365838	367419	1582	366752	497	166.257	4.66066	163.86	●	PBANKA_1109300	430	PBANKA_1109400	1284
PbANKA_11_v3	386291	389570	3280	388474	412	101.691	3.56651	99.8635	●	PBANKA_1109800	2189	PBANKA_1109700	3122
PbANKA_11_v3	401285	402987	1703	402299	494	149.946	4.25601	147.774	●	PBANKA_1110100	1164	PBANKA_1110200	6095
PbANKA_11_v3	407561	408603	1043	408093	490	178.325	5.06753	175.681	●	PBANKA_1110200	301	PBANKA_1110100	6958
PbANKA_11_v3	417995	418750	756	418357	324	70.2309	3.22071	68.5856	●	PBANKA_1110700	594
PbANKA_11_v3	462468	464477	2010	462986	498	170.241	4.76027	167.774	●
PbANKA_11_v3	465465	466294	830	465974	390	105.844	3.84453	103.991	●
PbANKA_11_v3	471981	472477	497	472257	353	75.8233	3.2066	74.1449	●	PBANKA_1111600	664
PbANKA_11_v3	492546	493115	570	492827	354	86.2929	3.52036	84.5551	●
PbANKA_11_v3	499535	500803	1269	500281	500	161.602	4.51057	159.281	●	PBANKA_1112700	193
PbANKA_11_v3	520303	522116	1814	521517	500	210.795	5.94802	206.655	●	PBANKA_1113400	452	PBANKA_1113300	1392
PbANKA_11_v3	525149	526098	950	525398	333	92.3501	3.89969	90.5781	●	PBANKA_1113500	61	PBANKA_1113600	1481
PbANKA_11_v3	529424	530311	888	529868	279	60.8072	3.22033	59.2223	●	PBANKA_1113700	78
PbANKA_11_v3	543708	545276	1569	544654	495	160.393	4.52052	158.09	●	PBANKA_1114100	287
PbANKA_11_v3	552421	552896	476	552692	319	72.3375	3.32585	70.6796	●
PbANKA_11_v3	561079	562678	1600	561953	499	172.048	4.80073	169.545	●
PbANKA_11_v3	572511	573516	1006	573009	291	57.956	3.02952	56.391	●	PBANKA_1115000	1048
PbANKA_11_v3	580330	583171	2842	582225	467	164.531	4.89843	162.164	●	PBANKA_1115200	706	PBANKA_1115100	1809
PbANKA_11_v3	589613	591324	1712	590163	441	134.494	4.26459	132.457	●	PBANKA_1115300	449
PbANKA_11_v3	594960	598994	4035	595458	467	163.09	4.85553	160.747	●	PBANKA_1115500	547	PBANKA_1115600	1434
PbANKA_11_v3	614244	615619	1376	614816	494	197.324	5.59637	193.987	●	PBANKA_1116100	359
PbANKA_11_v3	626687	630573	3887	627204	495	171.281	4.81698	168.792	●	PBANKA_1116500	391	PBANKA_1116700	2344
PbANKA_11_v3	634158	636800	2643	635463	476	147.519	4.33402	145.372	●	PBANKA_1116800	1487
PbANKA_11_v3	641002	648102	7101	646308	497	178.478	5.00037	175.83	●	PBANKA_1117100	1690	PBANKA_1117000	2639
PbANKA_11_v3	663301	664976	1676	664598	464	149.351	4.4865	147.185	●	PBANKA_1117700	378	PBANKA_1117600	1535
PbANKA_11_v3	684021	685885	1865	685650	340	79.2914	3.40089	77.5931	●
PbANKA_11_v3	737816	738789	974	738296	488	183.687	5.24806	180.887	●	PBANKA_1119700	745	PBANKA_1119600	1293
PbANKA_11_v3	739782	740421	640	740119	469	181.292	5.39403	178.569	●
PbANKA_11_v3	743640	744976	1337	744637	383	75.6658	3.03307	73.9884		PBANKA_1119900	1121	PBANKA_1120000	1146
PbANKA_11_v3	752175	754051	1877	753223	500	178.219	4.96319	175.578	●	PBANKA_1120100	949
PbANKA_11_v3	757980	760117	2138	759299	500	187.969	5.24383	185.034	●	PBANKA_1120400	1123
PbANKA_11_v3	765124	765736	613	765496	328	71.7586	3.24299	70.1043		PBANKA_1120600	798
PbANKA_11_v3	771956	774658	2703	774068	488	181.804	5.19162	179.067	●
PbANKA_11_v3	784029	785224	1196	784332	250	52.9026	3.14378	51.373	●	PBANKA_1121000	560
PbANKA_11_v3	832638	833460	823	833113	393	90.5905	3.3827	88.8288	●	PBANKA_1122400	516	PBANKA_1122500	951
PbANKA_11_v3	858987	860534	1548	859654	500	201.168	5.64266	197.617	●	PBANKA_1123200	403	PBANKA_1123100	610
PbANKA_11_v3	864290	865385	1096	864726	366	98.563	3.81433	96.7542	●	PBANKA_1123400	22	PBANKA_1123300	767
PbANKA_11_v3	867543	869155	1613	868659	482	165.747	4.78487	163.359	●	PBANKA_1123500	1112
PbANKA_11_v3	895589	896814	1226	896203	474	175.152	5.14441	172.582	●
PbANKA_11_v3	905420	906963	1544	905995	494	174.03	4.90375	171.485	●	PBANKA_1124500	1279
PbANKA_11_v3	927914	928750	837	928299	449	176.443	5.48547	173.844	●	PBANKA_1125200	580	PBANKA_1125100	1600
PbANKA_11_v3	969909	971766	1858	971171	500	213.394	6.03266	208.992	●
PbANKA_11_v3	1006163	1007283	1121	1006467	348	111.747	4.44644	109.86	●	PBANKA_1126800	657	PBANKA_1126900	3753
PbANKA_11_v3	1035496	1035946	451	1035727	312	68.0083	3.23042	66.3768	●	PBANKA_1127500	624
PbANKA_11_v3	1088343	1089198	856	1088795	441	126.534	4.0408	124.553	●	PBANKA_1128600	791	PBANKA_1128700	1261
PbANKA_11_v3	1092820	1094736	1917	1093902	499	206.745	5.83097	202.926	●	PBANKA_1128800	320
PbANKA_11_v3	1097223	1098780	1558	1098255	494	196.982	5.58571	193.662	●	PBANKA_1129000	295	PBANKA_1128900	1437
PbANKA_11_v3	1112798	1114493	1696	1113345	333	69.5715	3.14071	67.9303	●	PBANKA_1129200	868	PBANKA_1129300	1559
PbANKA_11_v3	1139532	1140363	832	1139991	481	159.57	4.62042	157.279	●	PBANKA_1130000	494	PBANKA_1129900	520
PbANKA_11_v3	1154486	1155102	617	1154769	444	154.353	4.82833	152.131	●
PbANKA_11_v3	1156017	1158780	2764	1156918	496	187.597	5.27656	184.676	●	PBANKA_1130600	331
PbANKA_11_v3	1161197	1162447	1251	1161490	436	148.87	4.74153	146.71	●	PBANKA_1130800	131
PbANKA_11_v3	1178324	1179901	1578	1179012	498	194.258	5.4542	191.069	●	PBANKA_1131400	515	PBANKA_1131500	843
PbANKA_11_v3	1191431	1194227	2797	1192126	498	192.94	5.41424	189.807	●	PBANKA_1131900	2057
PbANKA_11_v3	1202651	1206570	3920	1204252	399	102.947	3.69101	101.111	●	PBANKA_1132100	2596	PBANKA_1132000	3429
PbANKA_11_v3	1209729	1210353	625	1210092	286	67.0965	3.40053	65.4707	●	PBANKA_1132300	550
PbANKA_11_v3	1229086	1230193	1108	1229530	309	62.649	3.07104	61.052	●	PBANKA_1132800	598
PbANKA_11_v3	1230560	1231437	878	1230999	457	163.395	4.96938	161.047	●
PbANKA_11_v3	1270353	1270796	444	1270574	337	100.29	4.14579	98.4709	●	PBANKA_1133900	536
PbANKA_11_v3	1298240	1299428	1189	1299032	414	137.297	4.60403	135.238	●
PbANKA_11_v3	1305520	1306901	1382	1306317	491	198.501	5.67068	195.103	●	PBANKA_1134900	650
PbANKA_11_v3	1313157	1314797	1641	1314259	496	160.009	4.50193	157.712	●	PBANKA_1135100	835	PBANKA_1135000	3002
PbANKA_11_v3	1332504	1333752	1249	1333225	491	183.97	5.22347	181.162	●	PBANKA_1135400	675
PbANKA_11_v3	1343119	1345471	2353	1344824	500	190.515	5.31902	187.479	●	PBANKA_1135800	953	PBANKA_1135700	1929
PbANKA_11_v3	1359242	1359841	600	1359590	339	80.1936	3.43722	78.4901	●	PBANKA_1136100	678
PbANKA_11_v3	1377617	1378067	451	1377845	327	105.382	4.45383	103.532	●
PbANKA_11_v3	1416704	1418103	1400	1417577	500	193.106	5.3964	189.968	●	PBANKA_1137400	261
PbANKA_11_v3	1420653	1421267	615	1420995	277	56.7592	3.08414	55.2025	●	PBANKA_1137500	596
PbANKA_11_v3	1446340	1447287	948	1446958	471	168.496	4.97546	166.061	●	PBANKA_1138300	282	PBANKA_1138200	1243
PbANKA_11_v3	1458760	1459984	1225	1459396	498	202.431	5.70695	198.822	●	PBANKA_1138600	390
PbANKA_11_v3	1468440	1469239	800	1468773	280	63.5481	3.31618	61.9451	●	PBANKA_1138800	825
PbANKA_11_v3	1485276	1485943	668	1485685	364	99.0717	3.84755	97.2598	●	PBANKA_1139100	451
PbANKA_11_v3	1544653	1545163	511	1544901	342	109.979	4.45041	108.103	●
PbANKA_11_v3	1558743	1560063	1321	1559414	499	193.679	5.42509	190.517	●	PBANKA_1141400	568
PbANKA_11_v3	1561087	1562665	1579	1561725	496	213.026	6.0759	208.662	●
PbANKA_11_v3	1564484	1566752	2269	1564943	299	62.2178	3.12346	60.6236		PBANKA_1141500	848	PBANKA_1141600	2051
PbANKA_11_v3	1572428	1573188	761	1572751	360	100.127	3.91692	98.3087	●	PBANKA_1141900	768
PbANKA_11_v3	1586785	1589691	2907	1587224	489	195.608	5.60402	192.356	●	PBANKA_1142100	133
PbANKA_11_v3	1593540	1596962	3423	1595417	481	178.321	5.16358	175.678	●	PBANKA_1142400	239	PBANKA_1142300	2486
PbANKA_11_v3	1610208	1611756	1549	1610896	495	173.568	4.881	171.033	●
PbANKA_11_v3	1614816	1615747	932	1615156	379	120.47	4.41415	118.531	●	PBANKA_1143100	715
PbANKA_11_v3	1627747	1628856	1110	1628376	468	177.396	5.28225	174.775	●	PBANKA_1143600	28	PBANKA_1143500	985
PbANKA_11_v3	1637845	1638832	988	1638402	464	164.77	4.93682	162.398	●	PBANKA_1143800	389
PbANKA_11_v3	1649799	1650243	445	1650002	256	52.5823	3.08207	51.0551
PbANKA_11_v3	1685107	1686024	918	1685533	486	196.095	5.65709	192.819	●	PBANKA_1145200	544	PBANKA_1145300	862
PbANKA_11_v3	1709101	1712447	3347	1709760	381	84.943	3.2988	83.2129	●	PBANKA_1145700	1936	PBANKA_1145800	4776
PbANKA_12_v3	61167	61591	425	61398	259	59.019	3.31825	57.4463	●
PbANKA_12_v3	76344	77025	682	76727	439	152.331	4.81821	150.133	●	PBANKA_1201200	581
PbANKA_12_v3	91566	92611	1046	92094	290	66.7506	3.354	65.127	●	PBANKA_1201600	1069
PbANKA_12_v3	101176	101768	593	101421	272	60.0484	3.24765	58.4686	●
PbANKA_12_v3	103811	106996	3186	106141	498	188.735	5.28831	185.772	●	PBANKA_1202000	869	PBANKA_1201900	1958
PbANKA_12_v3	108637	109226	590	109029	265	60.6784	3.33236	59.0943	●
PbANKA_12_v3	113315	114674	1360	113718	451	156.9	4.83345	154.644	●	PBANKA_1202100	1240
PbANKA_12_v3	124477	125322	846	124985	274	59.0853	3.19445	57.5123	●	PBANKA_1202400	2101
PbANKA_12_v3	138593	141130	2538	139530	495	177.072	4.98029	174.458	●	PBANKA_1202600	1367
PbANKA_12_v3	164111	165022	912	164722	351	93.952	3.79148	92.1706	●	PBANKA_1203450	273
PbANKA_12_v3	172912	175124	2213	173358	451	170.113	5.25052	167.648	●	PBANKA_1203700	646
PbANKA_12_v3	187784	188846	1063	188304	298	59.7022	3.04351	58.1247	●	PBANKA_1204200	825
PbANKA_12_v3	188966	191269	2304	190353	487	194.101	5.58114	190.921	●	PBANKA_1204300	243
PbANKA_12_v3	193210	196356	3147	194331	488	167.607	4.78035	165.187	●	PBANKA_1204400	1057
PbANKA_12_v3	225558	227894	2337	227266	492	189.821	5.38862	186.812	●
PbANKA_12_v3	232943	234316	1374	233401	351	78.1356	3.28908	76.4437	●	PBANKA_1205900	1399
PbANKA_12_v3	242281	243221	941	242623	346	80.3685	3.39219	78.6641	●	PBANKA_1206200	2756
PbANKA_12_v3	244858	245617	760	245301	435	124.224	4.0232	122.259	●	PBANKA_1206200	78
PbANKA_12_v3	251268	252173	906	251535	311	89.078	4.00086	87.3246	●	PBANKA_1206300	3215
PbANKA_12_v3	285042	287033	1992	286075	483	149.535	4.33118	147.367	●	PBANKA_1206900	1139
PbANKA_12_v3	295136	296592	1457	295647	498	179.182	5.01042	176.516	●	PBANKA_1207400	230
PbANKA_12_v3	307144	307859	716	307509	484	186.537	5.38061	183.65	●	PBANKA_1207800	184	PBANKA_1207900	1743
PbANKA_12_v3	312983	314640	1658	313652	465	195.97	5.93581	192.701	●	PBANKA_1208000	1128
PbANKA_12_v3	328846	330006	1161	329366	497	183.316	5.13978	180.529	●	PBANKA_1208300	915	PBANKA_1208200	1149
PbANKA_12_v3	358645	360520	1876	359295	369	100.329	3.84551	98.5095	●	PBANKA_1209400	663
PbANKA_12_v3	371545	373086	1542	371947	380	112.336	4.13392	110.446	●	PBANKA_1209900	363
PbANKA_12_v3	378126	379226	1101	378543	349	88.7579	3.63765	87.0062	●	PBANKA_1210200	1415
PbANKA_12_v3	395268	396203	936	395798	353	80.5695	3.35005	78.8638	●
PbANKA_12_v3	403672	405631	1960	404584	498	157.211	4.41209	154.951	●	PBANKA_1210900	1076
PbANKA_12_v3	415957	416822	866	416583	397	137.904	4.81198	135.841	●
PbANKA_12_v3	435689	436746	1058	435946	442	166.427	5.23843	164.027	●	PBANKA_1211700	181
PbANKA_12_v3	442462	443831	1370	443424	414	96.8578	3.42404	95.0591	●	PBANKA_1211900	1089	PBANKA_1211800	2920
PbANKA_12_v3	448626	450606	1981	449776	500	179.401	4.99662	176.73	●	PBANKA_1212000	960
PbANKA_12_v3	477913	479313	1401	478359	319	71.6472	3.30267	69.9934	●	PBANKA_1212700	1680
PbANKA_12_v3	504711	505843	1133	505295	455	156.254	4.77283	154.007	●	PBANKA_1213100	967	PBANKA_1213000	4297
PbANKA_12_v3	531560	532246	687	531919	316	88.9988	3.9454	87.2458	●
PbANKA_12_v3	536765	537600	836	537053	425	116.452	3.88254	114.537	●	PBANKA_1214000	302
PbANKA_12_v3	539176	541075	1900	540445	422	133.701	4.41184	131.67	●	PBANKA_1214200	305	PBANKA_1214100	907
PbANKA_12_v3	541973	544029	2057	542652	331	74.5093	3.31113	72.8387	●	PBANKA_1214300	1400
PbANKA_12_v3	553483	554710	1228	554221	500	184.234	5.13495	181.417	●
PbANKA_12_v3	558061	561991	3931	560402	498	174.207	4.87007	171.659	●	PBANKA_1214800	1491	PBANKA_1214700	2666
PbANKA_12_v3	585345	587134	1790	586281	458	144.412	4.39994	142.294	●	PBANKA_1215600	435
PbANKA_12_v3	587755	589229	1475	588128	376	94.6248	3.61389	92.8394	●
PbANKA_12_v3	603102	603875	774	603302	286	60.6318	3.16031	59.048	●	PBANKA_1215900	425	PBANKA_1216000	1426
PbANKA_12_v3	673069	673639	571	673360	384	130.143	4.69312	128.137	●	PBANKA_1217500	1001
PbANKA_12_v3	678623	682722	4100	679955	499	157.861	4.42093	155.593	●	PBANKA_1217700	1297
PbANKA_12_v3	684286	685637	1352	684771	350	74.2953	3.17943	72.6261	●	PBANKA_1217900	96	PBANKA_1217800	730
PbANKA_12_v3	707602	709115	1514	708192	500	190.515	5.31902	187.479	●	PBANKA_1218300	400
PbANKA_12_v3	710408	715998	5591	715527	497	170.397	4.77379	167.926	●	PBANKA_1218600	429	PBANKA_1218500	2204
PbANKA_12_v3	735782	736544	763	736125	350	85.4737	3.52436	83.7405	●	PBANKA_1219100	340
PbANKA_12_v3	738880	740148	1269	739228	326	67.9686	3.1346	66.3374	●	PBANKA_1219300	1536	PBANKA_1219200	1910
PbANKA_12_v3	743234	744749	1516	744323	464	164.77	4.93682	162.398	●
PbANKA_12_v3	769241	770051	811	769558	331	66.0869	3.04457	64.4673	●	PBANKA_1220000	579	PBANKA_1219900	711
PbANKA_12_v3	782876	783630	755	783268	462	135.339	4.11837	133.296	●	PBANKA_1220400	198	PBANKA_1220300	869
PbANKA_12_v3	790507	792822	2316	791235	483	171.022	4.92661	168.54	●	PBANKA_1220500	457
PbANKA_12_v3	831030	832751	1722	832365	456	156.939	4.7833	154.682	●	PBANKA_1221600	1535
PbANKA_12_v3	846698	847347	650	847142	323	70.3471	3.23135	68.7011	●	PBANKA_1222200	268
PbANKA_12_v3	850033	850836	804	850583	361	79.2758	3.25913	77.5776	●	PBANKA_1222300	967
PbANKA_12_v3	851892	854399	2508	853614	405	133.241	4.56662	131.214	●	PBANKA_1222500	1048	PBANKA_1222400	1794
PbANKA_12_v3	859985	860551	567	860246	366	108.763	4.14923	106.894	●
PbANKA_12_v3	871466	872316	851	871816	434	110.179	3.65006	108.301	●	PBANKA_1223000	739
PbANKA_12_v3	876607	877521	915	876963	425	113.913	3.81216	112.014	●
PbANKA_12_v3	878699	881854	3156	880815	499	164.1	4.58519	161.739	●	PBANKA_1223200	134
PbANKA_12_v3	930314	930746	433	930535	285	56.3967	3.01479	54.8424	●
PbANKA_12_v3	931574	932627	1054	932130	351	80.2087	3.35254	78.5051	●
PbANKA_12_v3	939002	940647	1646	940213	499	185.059	5.16943	182.219	●	PBANKA_1224900	265
PbANKA_12_v3	942648	943539	892	943081	310	66.3249	3.18756	64.704	●	PBANKA_1225000	1925
PbANKA_12_v3	949288	950182	895	949703	480	144.467	4.22143	142.348	●	PBANKA_1225100	1464
PbANKA_12_v3	960176	961224	1049	960868	418	130.859	4.36244	128.848	●	PBANKA_1225300	355
PbANKA_12_v3	973199	974778	1580	974421	473	160.143	4.71068	157.843	●	PBANKA_1225700	111
PbANKA_12_v3	981981	982711	731	982352	464	152.446	4.57442	150.247	●
PbANKA_12_v3	1030766	1031728	963	1031087	453	156.009	4.78572	153.765	●	PBANKA_1226800	497
PbANKA_12_v3	1039571	1040495	925	1040063	444	124.344	3.95826	122.378	●	PBANKA_1227100	79
PbANKA_12_v3	1045208	1047125	1918	1046812	480	178.969	5.1942	176.308	●
PbANKA_12_v3	1048605	1050284	1680	1049350	492	149.404	4.25736	147.237	●	PBANKA_1227400	797
PbANKA_12_v3	1074245	1076117	1873	1074742	498	168.852	4.72224	166.41	●	PBANKA_1228100	1368	PBANKA_1228000	3164
PbANKA_12_v3	1086246	1087537	1292	1086845	491	175.445	4.97385	172.868	●	PBANKA_1228200	313
PbANKA_12_v3	1101883	1104268	2386	1102721	493	195.551	5.55326	192.304	●	PBANKA_1228300	923	PBANKA_1228400	3828
PbANKA_12_v3	1137342	1138665	1324	1137979	369	88.4671	3.47923	86.7169	●	PBANKA_1229200	647
PbANKA_12_v3	1153619	1155049	1431	1154369	495	174.726	4.91366	172.166	●	PBANKA_1229900	331	PBANKA_1229800	804
PbANKA_12_v3	1205911	1207516	1606	1206877	499	166.246	4.6427	163.849	●	PBANKA_1231300	374	PBANKA_1231200	1178
PbANKA_12_v3	1219828	1221518	1691	1220651	471	187.517	5.57023	184.599	●
PbANKA_12_v3	1228395	1231128	2734	1230094	497	173.802	4.86833	171.261	●	PBANKA_1231600	3026
PbANKA_12_v3	1243561	1245402	1842	1244172	495	154.766	4.37251	152.538	●	PBANKA_1232100	907	PBANKA_1232200	2803
PbANKA_12_v3	1250433	1251526	1094	1251141	497	209.191	5.9362	205.186	●
PbANKA_12_v3	1253273	1254464	1192	1253771	497	208.458	5.91241	204.51	●	PBANKA_1232300	239
PbANKA_12_v3	1255144	1257357	2214	1256761	427	129.49	4.24001	127.489	●	PBANKA_1232400	1386	PBANKA_1232500	1418
PbANKA_12_v3	1293209	1295551	2343	1293978	476	175.047	5.11927	172.479	●	PBANKA_1233500	917
PbANKA_12_v3	1295718	1297222	1505	1296566	499	195.001	5.46513	191.777	●	PBANKA_1233600	225
PbANKA_12_v3	1304322	1306735	2414	1306376	469	167.388	4.96321	164.972	●	PBANKA_1234100	330	PBANKA_1234000	2055
PbANKA_12_v3	1337674	1339971	2298	1339305	500	173.586	4.83384	171.05	●
PbANKA_12_v3	1361392	1362332	941	1361652	382	128.135	4.64579	126.144	●
PbANKA_12_v3	1380592	1381071	480	1380822	378	118.811	4.36827	116.882	●	PBANKA_1236200	469	PBANKA_1236300	1600
PbANKA_12_v3	1383369	1383806	438	1383578	261	52.2424	3.03037	50.7176	●
PbANKA_12_v3	1385081	1385661	581	1385325	324	74.2872	3.35427	72.618	●	PBANKA_1236400	309
PbANKA_12_v3	1393923	1396566	2644	1395959	498	195.589	5.49476	192.339	●
PbANKA_12_v3	1433363	1434411	1049	1433854	497	193.517	5.44327	190.361	●	PBANKA_1237200	314
PbANKA_12_v3	1442863	1444792	1930	1444311	447	164.738	5.12367	162.367	●	PBANKA_1237600	823	PBANKA_1237500	2596
PbANKA_12_v3	1459934	1460897	964	1460194	352	72.113	3.10265	70.4565	●	PBANKA_1237900	382	PBANKA_1238000	905
PbANKA_12_v3	1487038	1489172	2135	1488886	433	149.059	4.77901	146.896	●	PBANKA_1238800	1045	PBANKA_1238700	2656
PbANKA_12_v3	1493107	1494654	1548	1493901	479	165.948	4.81964	163.556	●	PBANKA_1238900	1131
PbANKA_12_v3	1498008	1501403	3396	1498939	500	195.744	5.47607	192.488	●
PbANKA_12_v3	1511297	1512779	1483	1512124	487	170.615	4.87517	168.14	●	PBANKA_1239500	1330
PbANKA_12_v3	1521575	1524655	3081	1522845	396	110.818	3.94611	108.937	●	PBANKA_1239800	2055
PbANKA_12_v3	1527531	1529450	1920	1528302	356	85.789	3.48995	84.054	●	PBANKA_1239900	1647
PbANKA_12_v3	1561514	1564164	2651	1562982	499	181.088	5.05473	178.369
PbANKA_12_v3	1592293	1592776	484	1592568	283	69.1648	3.50668	67.526	●	PBANKA_1241900	1735
PbANKA_12_v3	1607713	1608304	592	1607978	341	79.8291	3.41086	78.1278	●	PBANKA_1242400	1427	PBANKA_1242500	1467
PbANKA_12_v3	1620266	1621244	979	1620771	485	160.1	4.59922	157.801	●	PBANKA_1242800	360
PbANKA_12_v3	1623893	1625882	1990	1624507	294	57.7569	3.00279	56.1932	●	PBANKA_1243000	1212	PBANKA_1242900	1590
PbANKA_12_v3	1636027	1637392	1366	1636661	500	178.219	4.96319	175.578	●	PBANKA_1243400	1228
PbANKA_12_v3	1638079	1639454	1376	1638800	497	184.552	5.17585	181.725	●	PBANKA_1243500	281
PbANKA_12_v3	1656257	1657136	880	1656720	465	130.84	3.9778	128.83	●
PbANKA_12_v3	1668375	1669461	1087	1668848	301	75.7205	3.59264	74.0427
PbANKA_12_v3	1673107	1673829	723	1673383	363	98.4814	3.83701	96.6731	●	PBANKA_1244400	170	PBANKA_1244500	1952
PbANKA_12_v3	1700754	1702019	1266	1701374	499	189.784	5.30841	186.777	●	PBANKA_1245150	131	PBANKA_1245200	262
PbANKA_12_v3	1724714	1726685	1972	1725408	495	206.541	5.87688	202.738	●	PBANKA_1245500	893
PbANKA_12_v3	1742161	1745276	3116	1742657	304	61.4201	3.06248	59.8311		PBANKA_1245800	10880
PbANKA_13_v3	47270	47808	539	47549	379	127.311	4.65132	125.325	●	PBANKA_1300500	836	PBANKA_1300600	2083
PbANKA_13_v3	57488	59246	1759	58127	500	206.798	5.81971	202.976	●	PBANKA_1300700	662	PBANKA_1300800	1455
PbANKA_13_v3	89523	92220	2698	91352	497	198.901	5.60887	195.481	●	PBANKA_1301300	2166
PbANKA_13_v3	166004	168774	2771	167361	499	171.766	4.79296	169.268		PBANKA_1302800	1407
PbANKA_13_v3	169794	170268	475	170038	252	57.0939	3.30147	55.5348	●	PBANKA_1302900	610
PbANKA_13_v3	193236	193736	501	193484	351	113.846	4.48949	111.947	●
PbANKA_13_v3	194700	196349	1650	195668	487	186.148	5.33397	183.273	●	PBANKA_1303300	1277	PBANKA_1303400	3384
PbANKA_13_v3	203822	204543	722	204251	442	147.442	4.63676	145.295	●	PBANKA_1303500	591
PbANKA_13_v3	220514	221543	1030	221126	379	121.493	4.44905	119.547	●	PBANKA_1303900	1019
PbANKA_13_v3	247284	248951	1668	248273	497	210.297	5.97226	206.194	●
PbANKA_13_v3	280590	281498	909	280946	457	178.402	5.44843	175.757	●
PbANKA_13_v3	289168	289732	565	289443	305	67.7411	3.27221	66.1112	●	PBANKA_1305700	282	PBANKA_1305800	527
PbANKA_13_v3	437355	439942	2588	438668	430	119.434	3.92811	117.501	●	PBANKA_1309400	1399
PbANKA_13_v3	456801	458087	1287	457202	386	102.146	3.76459	100.315	●
PbANKA_13_v3	459834	460458	625	460133	348	100.858	4.05405	99.035	●	PBANKA_1309800	452
PbANKA_13_v3	481839	482347	509	482088	265	57.8863	3.22065	56.3216
PbANKA_13_v3	498039	500206	2168	498846	496	192.776	5.43234	189.651	●
PbANKA_13_v3	501831	502932	1102	502212	357	98.7673	3.89865	96.9573	●	PBANKA_1311300	351	PBANKA_1311200	1343
PbANKA_13_v3	522715	523541	827	522944	277	62.1441	3.28732	60.5503		PBANKA_1311800	219	PBANKA_1311900	824
PbANKA_13_v3	534620	536675	2056	535285	499	196.67	5.51603	193.366	●	PBANKA_1312100	759
PbANKA_13_v3	541349	542617	1269	541681	462	168.118	5.06071	165.69	●	PBANKA_1312300	172	PBANKA_1312400	1035
PbANKA_13_v3	548297	550776	2480	548973	497	185.799	5.21243	182.935	●	PBANKA_1312700	584	PBANKA_1312800	1751
PbANKA_13_v3	554629	555866	1238	555483	290	61.8503	3.17485	60.2582	●	PBANKA_1312900	360
PbANKA_13_v3	560716	561681	966	561241	486	170.786	4.88992	168.309	●
PbANKA_13_v3	575934	577294	1361	576311	416	133.365	4.45918	131.336	●	PBANKA_1313300	272
PbANKA_13_v3	583698	585855	2158	585059	483	172.194	4.96071	169.687	●	PBANKA_1313700	611	PBANKA_1313600	1333
PbANKA_13_v3	587055	588961	1907	588010	498	196.932	5.53593	193.614	●
PbANKA_13_v3	623808	625198	1391	624895	441	167.924	5.30068	165.499	●	PBANKA_1314800	70	PBANKA_1314700	3059
PbANKA_13_v3	648641	650186	1546	649457	497	210.297	5.97226	206.194	●
PbANKA_13_v3	651448	654366	2919	652944	496	209.885	5.97236	205.816	●	PBANKA_1315500	1468	PBANKA_1315400	2190
PbANKA_13_v3	722687	723186	500	722951	302	97.5026	4.45108	95.7001	●
PbANKA_13_v3	726313	728066	1754	727048	500	203.956	5.72982	200.284	●	PBANKA_1317200	555
PbANKA_13_v3	757832	758541	710	758291	384	107.546	3.94602	105.683	●	PBANKA_1318100	82
PbANKA_13_v3	766776	767943	1168	767490	423	166.42	5.48456	164.02	●	PBANKA_1318500	389
PbANKA_13_v3	769636	771506	1871	770491	499	207.465	5.85402	203.58	●	PBANKA_1318600	644
PbANKA_13_v3	773713	775387	1675	774922	484	175.277	5.04074	172.703	●	PBANKA_1318700	1248
PbANKA_13_v3	775631	777170	1540	776547	490	182	5.17575	179.256	●	PBANKA_1318800	604	PBANKA_1318900	1658
PbANKA_13_v3	779893	781287	1395	780671	492	189.821	5.38862	186.812	●	PBANKA_1319000	1502
PbANKA_13_v3	803996	806637	2642	805984	493	203.914	5.81827	200.246	●	PBANKA_1319500	474	PBANKA_1319400	2421
PbANKA_13_v3	830049	831902	1854	830997	498	167.751	4.69226	165.328	●	PBANKA_1320100	880	PBANKA_1320200	1207
PbANKA_13_v3	852646	853473	828	853220	330	69.3412	3.15253	67.7013	●
PbANKA_13_v3	855863	857745	1883	856551	490	157.105	4.47495	154.846	●	PBANKA_1320700	326	PBANKA_1320800	1329
PbANKA_13_v3	865002	866033	1032	865379	477	154.788	4.52351	152.56	●	PBANKA_1321000	498	PBANKA_1321100	1581
PbANKA_13_v3	935435	936419	985	936166	385	119.828	4.33097	117.893	●	PBANKA_1322800	34
PbANKA_13_v3	976510	977309	800	976810	405	136.667	4.67947	134.613	●	PBANKA_1324300	852
PbANKA_13_v3	987781	988880	1100	988427	472	184.567	5.46232	181.74	●	PBANKA_1324800	308
PbANKA_13_v3	993454	995025	1572	994631	402	138.455	4.77306	136.388	●
PbANKA_13_v3	998391	999557	1167	998966	493	195.213	5.54274	191.981	●	PBANKA_1325200	188
PbANKA_13_v3	1003183	1004812	1630	1004119	499	210.383	5.94807	206.271	●	PBANKA_1325400	455	PBANKA_1325500	619
PbANKA_13_v3	1036847	1038192	1346	1037528	387	103.348	3.793	101.51	●	PBANKA_1326300	817	PBANKA_1326400	2467
PbANKA_13_v3	1046479	1047864	1386	1046980	497	155.556	4.37711	153.318	●	PBANKA_1326600	355
PbANKA_13_v3	1108907	1110152	1246	1109676	366	100.256	3.86863	98.4364	●	PBANKA_1327900	572	PBANKA_1327800	646
PbANKA_13_v3	1124504	1126027	1524	1125281	495	163.567	4.60555	161.216	●
PbANKA_13_v3	1134249	1135396	1148	1134763	478	172.235	5.01356	169.727	●	PBANKA_1328300	995	PBANKA_1328400	1925
PbANKA_13_v3	1135545	1136420	876	1136007	373	80.1336	3.21099	78.4305		PBANKA_1328400	681	PBANKA_1328300	2239
PbANKA_13_v3	1148516	1150536	2021	1149568	499	185.059	5.16943	182.219	●	PBANKA_1328900	1543	PBANKA_1328800	1636
PbANKA_13_v3	1160873	1162458	1586	1161533	498	185.271	5.18624	182.424	●	PBANKA_1329100	305	PBANKA_1329200	1475
PbANKA_13_v3	1189001	1190737	1737	1189514	465	181.028	5.43446	178.313	●	PBANKA_1329400	212	PBANKA_1329500	1807
PbANKA_13_v3	1205035	1206050	1016	1205562	387	107.382	3.91579	105.521	●	PBANKA_1329700	787	PBANKA_1329600	3895
PbANKA_13_v3	1218293	1222023	3731	1220558	497	172.658	4.83641	170.141	●	PBANKA_1329900	333	PBANKA_1329800	6012
PbANKA_13_v3	1244064	1245451	1388	1244968	496	191.464	5.39254	188.391	●
PbANKA_13_v3	1249710	1253362	3653	1251949	350	83.4324	3.45985	81.7108	●	PBANKA_1331200	1418
PbANKA_13_v3	1258510	1260194	1685	1259754	439	156.669	4.95563	154.416	●
PbANKA_13_v3	1283859	1285481	1623	1285016	327	76.6018	3.40899	74.9189	●	PBANKA_1331700	2089
PbANKA_13_v3	1291710	1292337	628	1292031	360	78.0915	3.23049	76.3999	●	PBANKA_1331800	627	PBANKA_1331900	5840
PbANKA_13_v3	1299355	1300591	1237	1300204	492	173.8	4.91683	171.26	●
PbANKA_13_v3	1307875	1308913	1039	1308435	446	169.016	5.2752	166.571	●	PBANKA_1332100	1765
PbANKA_13_v3	1324669	1325545	877	1325159	405	137.768	4.71617	135.707	●	PBANKA_1332800	1216
PbANKA_13_v3	1339486	1340023	538	1339750	291	66.5806	3.33954	64.958	●
PbANKA_13_v3	1353195	1354985	1791	1353976	470	154.366	4.57419	152.144	●	PBANKA_1333700	729	PBANKA_1333600	1244
PbANKA_13_v3	1384022	1384639	618	1384343	386	115.141	4.16848	113.234	●	PBANKA_1334500	807
PbANKA_13_v3	1389560	1390890	1331	1390181	496	187.28	5.26712	184.37	●	PBANKA_1334800	796	PBANKA_1334700	917
PbANKA_13_v3	1396707	1398154	1448	1397525	498	164.5	4.60454	162.133	●	PBANKA_1335000	232
PbANKA_13_v3	1430288	1431410	1123	1430844	489	176.713	5.03091	174.108	●
PbANKA_13_v3	1432545	1432992	448	1432771	269	53.4454	3.018	51.9119		PBANKA_1336000	368	PBANKA_1336100	501
PbANKA_13_v3	1456718	1457355	638	1456943	384	104.951	3.86575	103.104	●	PBANKA_1336900	14	PBANKA_1337000	1576
PbANKA_13_v3	1459525	1461322	1798	1460504	496	152.926	4.31707	150.721	●	PBANKA_1337100	1781
PbANKA_13_v3	1474179	1476751	2573	1476433	377	118.416	4.36524	116.489	●	PBANKA_1337500	278
PbANKA_13_v3	1501193	1503816	2624	1502691	500	178.809	4.97985	176.152
PbANKA_13_v3	1519153	1519703	551	1519399	422	140.475	4.62265	138.392	●	PBANKA_1338800	1157
PbANKA_13_v3	1522255	1524374	2120	1523590	493	168.783	4.7663	166.343	●	PBANKA_1338900	636
PbANKA_13_v3	1562810	1563335	526	1563087	299	61.4307	3.09625	59.8414	●	PBANKA_1339700	200	PBANKA_1339800	336
PbANKA_13_v3	1566419	1567163	745	1566873	329	65.1119	3.02623	63.4986	●
PbANKA_13_v3	1619387	1619980	594	1619680	438	144.764	4.5949	142.642	●	PBANKA_1341300	267
PbANKA_13_v3	1652114	1652712	599	1652465	396	96.4142	3.52601	94.6182	●	PBANKA_1341900	541
PbANKA_13_v3	1666571	1667798	1228	1667304	499	157.861	4.42093	155.593	●	PBANKA_1342300	152	PBANKA_1342400	981
PbANKA_13_v3	1684247	1685296	1050	1684782	497	164.636	4.61689	162.267	●	PBANKA_1342900	560	PBANKA_1343000	1934
PbANKA_13_v3	1724672	1726817	2146	1725765	491	140.606	4.04245	138.521	●	PBANKA_1343700	967	PBANKA_1343800	1459
PbANKA_13_v3	1729153	1729763	611	1729374	333	66.1515	3.03472	64.5316	●	PBANKA_1343900	14
PbANKA_13_v3	1767674	1770072	2399	1768779	469	128.877	3.89955	126.881	●	PBANKA_1344600	1178
PbANKA_13_v3	1771365	1772509	1145	1772008	319	66.018	3.11693	64.399	●	PBANKA_1344700	819	PBANKA_1344800	1573
PbANKA_13_v3	1785932	1786802	871	1786237	422	115.1	3.8671	113.194	●	PBANKA_1345300	454
PbANKA_13_v3	1788768	1791275	2508	1790908	490	173.571	4.93009	171.036	●	PBANKA_1345500	128	PBANKA_1345400	2343
PbANKA_13_v3	1795036	1795704	669	1795348	365	90.3882	3.56616	88.6277	●	PBANKA_1345700	219	PBANKA_1345600	947
PbANKA_13_v3	1796836	1798725	1890	1798207	482	150.883	4.37511	148.701	●	PBANKA_1345800	1206
PbANKA_13_v3	1810423	1812071	1649	1811007	482	151.385	4.38853	149.198	●	PBANKA_1346200	857
PbANKA_13_v3	1812499	1813607	1109	1812956	487	154.122	4.4204	151.903	●	PBANKA_1346300	528
PbANKA_13_v3	1817021	1818676	1656	1818104	500	191.158	5.33816	188.097	●
PbANKA_13_v3	1822554	1824231	1678	1823072	456	134.638	4.14594	132.6	●	PBANKA_1346600	645	PBANKA_1346700	925
PbANKA_13_v3	1824781	1826054	1274	1825301	500	171.327	4.77166	168.838	●
PbANKA_13_v3	1827173	1828525	1353	1827794	336	70.2814	3.14396	68.6358	●	PBANKA_1346800	568	PBANKA_1346900	927
PbANKA_13_v3	1852188	1853238	1051	1852799	464	175.757	5.27734	173.174	●
PbANKA_13_v3	1879507	1881427	1921	1880635	500	200.136	5.61066	196.648	●	PBANKA_1348700	1459
PbANKA_13_v3	1893468	1894088	621	1893872	293	62.2377	3.16675	60.6433	●	PBANKA_1349200	517
PbANKA_13_v3	1895718	1896424	707	1896117	459	160.138	4.84897	157.838	●	PBANKA_1349300	233	PBANKA_1349400	1527
PbANKA_13_v3	1920903	1922457	1555	1921502	382	112.647	4.12539	110.756	●
PbANKA_13_v3	1932387	1932887	501	1932646	407	97.4321	3.48271	95.63	●	PBANKA_1350700	498
PbANKA_13_v3	1942227	1943673	1447	1943101	481	175.563	5.08088	172.984	●	PBANKA_1351100	549
PbANKA_13_v3	1954995	1961560	6566	1960894	495	201.405	5.71234	197.845		PBANKA_1351400	213	PBANKA_1351300	5460
PbANKA_13_v3	1973349	1974656	1308	1974272	382	107.22	3.95288	105.359	●	PBANKA_1351800	603
PbANKA_13_v3	1977455	1978647	1193	1978104	476	158.375	4.63246	156.099	●	PBANKA_1351900	326	PBANKA_1352000	2565
PbANKA_13_v3	1993355	1995404	2050	1993959	497	218.274	6.23745	213.439	●	PBANKA_1352400	216
PbANKA_13_v3	1998359	1999729	1371	1998960	498	184.032	5.1501	181.221	●	PBANKA_1352500	375
PbANKA_13_v3	2003482	2008851	5370	2006486	499	159.908	4.47436	157.612	●	PBANKA_1352700	3108	PBANKA_1352600	4273
PbANKA_13_v3	2010087	2014468	4382	2010948	475	174.547	5.11503	171.99	●
PbANKA_13_v3	2038387	2040197	1811	2039291	489	191.555	5.47711	188.48	●	PBANKA_1353800	486
PbANKA_13_v3	2043007	2044284	1278	2043712	491	197.462	5.63777	194.119	●	PBANKA_1353900	437
PbANKA_13_v3	2045202	2046476	1275	2045459	428	129.161	4.22168	127.162	●
PbANKA_13_v3	2048111	2050419	2309	2048738	386	99.5106	3.68589	97.6961	●	PBANKA_1354100	836	PBANKA_1354200	1178
PbANKA_13_v3	2055129	2057510	2382	2056734	497	163.566	4.58816	161.215	●
PbANKA_13_v3	2059007	2060469	1463	2059362	488	207.183	5.99294	203.331	●	PBANKA_1354400	921	PBANKA_1354500	985
PbANKA_13_v3	2077262	2079944	2683	2078742	429	117.972	3.89503	116.048	●	PBANKA_1355200	1505	PBANKA_1355100	1961
PbANKA_13_v3	2090834	2092438	1605	2091515	494	186.144	5.25532	183.27	●	PBANKA_1355500	750
PbANKA_13_v3	2119234	2120075	842	2119626	267	53.0765	3.01843	51.5457	●	PBANKA_1356100	879	PBANKA_1356200	2628
PbANKA_13_v3	2128629	2129733	1105	2129273	346	72.9164	3.16254	71.2552	●	PBANKA_1356300	1053	PBANKA_1356400	1226
PbANKA_13_v3	2144595	2145219	625	2144858	418	135.717	4.51316	133.671	●	PBANKA_1356700	2204
PbANKA_13_v3	2188964	2191286	2323	2190183	478	171.343	4.98713	168.853	●	PBANKA_1357300	1732
PbANKA_13_v3	2209426	2210676	1251	2210129	500	223.455	6.3693	218.018	●	PBANKA_1357900	353
PbANKA_13_v3	2211861	2212411	551	2212103	276	67.1403	3.49158	65.5142	●
PbANKA_13_v3	2212513	2214693	2181	2213963	468	168.761	5.01524	166.321	●
PbANKA_13_v3	2233176	2234747	1572	2233539	488	207.704	6.01035	203.809	●	PBANKA_1358600	37	PBANKA_1358700	1996
PbANKA_13_v3	2244123	2246357	2235	2245577	497	153.566	4.32576	151.354	●	PBANKA_1359000	1324	PBANKA_1358900	1524
PbANKA_13_v3	2274457	2275593	1137	2275013	495	188.144	5.30397	185.203	●	PBANKA_1359500	559
PbANKA_13_v3	2279604	2283148	3545	2282342	499	207.105	5.84247	203.263	●
PbANKA_13_v3	2297117	2299813	2697	2299260	499	197.344	5.53665	194.006	●	PBANKA_1360400	177	PBANKA_1360300	2578
PbANKA_13_v3	2302120	2303676	1557	2302454	397	111.861	3.96937	109.974	●	PBANKA_1360500	2278
PbANKA_13_v3	2308460	2309545	1086	2308911	497	205.921	5.8306	202.151	●
PbANKA_13_v3	2342592	2344201	1610	2343533	500	169.934	4.73361	167.472	●	PBANKA_1361300	1207	PBANKA_1361200	1538
PbANKA_13_v3	2362326	2364241	1916	2363364	427	155.33	5.04997	153.095	●	PBANKA_1361800	156
PbANKA_13_v3	2367765	2370650	2886	2369962	436	137.726	4.40281	135.664	●	PBANKA_1362100	649	PBANKA_1362000	2031
PbANKA_13_v3	2374958	2375678	721	2375295	318	70.4431	3.26956	68.7964	●	PBANKA_1362200	514
PbANKA_13_v3	2385775	2386573	799	2386028	306	71.4019	3.39316	69.7496	●	PBANKA_1362300	204	PBANKA_1362400	816
PbANKA_13_v3	2394543	2395643	1101	2395134	494	209.024	5.97134	205.028	●	PBANKA_1362800	208
PbANKA_13_v3	2400895	2403894	3000	2402758	385	114.516	4.15771	112.613	●
PbANKA_13_v3	2413024	2414306	1283	2413708	469	197.471	5.93064	194.127	●	PBANKA_1363600	562
PbANKA_13_v3	2416857	2417776	920	2417405	288	63.1317	3.23649	61.5316	●	PBANKA_1363700	1393	PBANKA_1363800	2355
PbANKA_13_v3	2424209	2426624	2416	2425285	492	174.969	4.95017	172.402	●
PbANKA_13_v3	2434117	2435648	1532	2435111	490	156.847	4.46807	154.592	●	PBANKA_1364200	433	PBANKA_1364100	1150
PbANKA_13_v3	2436332	2438183	1852	2437851	350	79.6787	3.34302	77.978	●	PBANKA_1364300	473
PbANKA_13_v3	2455327	2456678	1352	2456282	488	158.913	4.54056	156.63	●
PbANKA_13_v3	2473436	2475156	1721	2473945	301	67.6974	3.30094	66.0679	●	PBANKA_1365200	529	PBANKA_1365300	4051
PbANKA_13_v3	2475829	2476612	784	2476283	323	69.0296	3.1884	67.3918	●	PBANKA_1365300	1713	PBANKA_1365200	2867
PbANKA_13_v3	2493494	2494265	772	2493955	488	163.188	4.65737	160.843	●
PbANKA_14_v3	83282	85842	2561	84635	497	180.876	5.06912	178.164	●	PBANKA_1400700	872
PbANKA_14_v3	89122	90511	1390	89881	496	210.999	6.00893	206.841	●	PBANKA_1400900	276
PbANKA_14_v3	200497	201918	1422	201015	481	203.706	5.97389	200.05	●	PBANKA_1403300	918	PBANKA_1403400	1389
PbANKA_14_v3	233589	234612	1024	234186	452	158.739	4.87938	156.459	●	PBANKA_1404300	230
PbANKA_14_v3	247150	248660	1511	247712	495	199.801	5.6617	196.328	●	PBANKA_1404700	117	PBANKA_1404800	2302
PbANKA_14_v3	261167	262482	1316	261811	498	187.782	5.26008	184.854	●
PbANKA_14_v3	264216	265047	832	264472	333	87.8094	3.74044	86.0631	●	PBANKA_1405100	332
PbANKA_14_v3	293655	294432	778	294055	396	119.52	4.21488	117.586	●
PbANKA_14_v3	299905	300771	867	300194	264	53.5909	3.06029	52.0563		PBANKA_1406400	423	PBANKA_1406500	1774
PbANKA_14_v3	300930	301793	864	301449	361	93.2097	3.68478	91.4327	●	PBANKA_1406500	519	PBANKA_1406400	1678
PbANKA_14_v3	331930	333706	1777	332463	498	202.431	5.70695	198.822	●	PBANKA_1406900	149
PbANKA_14_v3	335258	336176	919	335598	309	65.1702	3.15547	63.5565	●	PBANKA_1407000	508
PbANKA_14_v3	345829	347704	1876	346950	500	194.419	5.43594	191.224	●	PBANKA_1407300	1539
PbANKA_14_v3	352112	354549	2438	353325	497	168.173	4.71278	165.744	●	PBANKA_1407400	1911
PbANKA_14_v3	356836	357786	951	357504	441	131.619	4.18283	129.603	●	PBANKA_1407600	499	PBANKA_1407500	1980
PbANKA_14_v3	384932	386128	1197	385420	466	171.884	5.13285	169.384	●	PBANKA_1408500	713
PbANKA_14_v3	387032	387658	627	387239	268	66.1194	3.52657	64.4997	●	PBANKA_1408600	844
PbANKA_14_v3	391863	392991	1129	392323	325	72.7353	3.29568	71.0751	●
PbANKA_14_v3	423620	424082	463	423842	254	62.1214	3.49705	60.5277	●	PBANKA_1409900	281
PbANKA_14_v3	426609	427035	427	426837	330	103.524	4.34515	101.685	●
PbANKA_14_v3	458087	460679	2593	458875	495	204.38	5.80719	200.689	●	PBANKA_1410950	731
PbANKA_14_v3	470477	472425	1949	471933	487	166.923	4.77058	164.515	●	PBANKA_1411300	687	PBANKA_1411200	1908
PbANKA_14_v3	508258	510752	2495	510171	500	201.168	5.64266	197.617	●
PbANKA_14_v3	532308	533178	871	532686	485	198.129	5.73545	194.751	●	PBANKA_1412600	521
PbANKA_14_v3	544883	545366	484	545123	317	69.2531	3.23691	67.6139	●
PbANKA_14_v3	552885	553669	785	553332	441	152.29	4.79578	150.092	●
PbANKA_14_v3	589844	591570	1727	590413	499	203.193	5.71838	199.556	●	PBANKA_1414500	394	PBANKA_1414600	1909
PbANKA_14_v3	598435	600527	2093	599099	498	186.521	5.2229	183.635	●	PBANKA_1414800	354	PBANKA_1414900	587
PbANKA_14_v3	601235	601942	708	601530	306	67.5849	3.25936	65.9561	●	PBANKA_1415000	846
PbANKA_14_v3	609912	611374	1463	610781	492	213.895	6.1618	209.461	●	PBANKA_1415200	394
PbANKA_14_v3	632700	635042	2343	633994	496	192.776	5.43234	189.651	●	PBANKA_1415700	1555
PbANKA_14_v3	648074	648521	448	648276	255	56.1283	3.23444	54.5759	●	PBANKA_1416100	329	PBANKA_1416000	342
PbANKA_14_v3	663179	663646	468	663410	341	98.6096	4.04412	96.8005	●	PBANKA_1416700	449	PBANKA_1416600	978
PbANKA_14_v3	689033	690049	1017	689317	351	116.62	4.59334	114.705	●
PbANKA_14_v3	690907	691710	804	691398	418	156.288	5.19307	154.041	●	PBANKA_1417400	284	PBANKA_1417300	1986
PbANKA_14_v3	716645	719146	2502	718443	489	189.571	5.41579	186.575	●	PBANKA_1418100	1258
PbANKA_14_v3	745894	747102	1209	746659	456	168.414	5.13733	165.981	●	PBANKA_1418900	643
PbANKA_14_v3	754301	755589	1289	754938	493	184.162	5.20737	181.347	●	PBANKA_1419100	371
PbANKA_14_v3	756232	759966	3735	759311	498	183.724	5.14114	180.925	●	PBANKA_1419200	767	PBANKA_1419300	943
PbANKA_14_v3	793112	793487	376	793309	242	52.8562	3.2113	51.327
PbANKA_14_v3	821597	822543	947	821985	372	85.047	3.35817	83.3163	●	PBANKA_1420500	1677
PbANKA_14_v3	822969	823596	628	823279	423	132.835	4.37603	130.81	●	PBANKA_1420500	2971
PbANKA_14_v3	824778	826070	1293	825594	487	168.048	4.80228	165.621	●	PBANKA_1420600	724
PbANKA_14_v3	847346	847807	462	847579	350	74.2953	3.17943	72.6261		PBANKA_1421300	1902
PbANKA_14_v3	848160	849391	1232	849019	430	126.635	4.13153	124.653	●	PBANKA_1421300	462
PbANKA_14_v3	855786	857127	1342	856424	500	172.452	4.80255	169.94	●	PBANKA_1421500	474
PbANKA_14_v3	860063	862166	2104	861143	485	180.889	5.19703	178.177	●	PBANKA_1421700	272
PbANKA_14_v3	875590	876922	1333	876223	497	172.658	4.83641	170.141	●	PBANKA_1422300	798
PbANKA_14_v3	881401	882541	1141	881772	371	77.8186	3.15721	76.1286	●	PBANKA_1422400	1569
PbANKA_14_v3	891356	892073	718	891722	340	99.6182	4.09027	97.803	●	PBANKA_1422900	468	PBANKA_1422800	815
PbANKA_14_v3	896656	897726	1071	897248	474	173.62	5.09781	171.083	●	PBANKA_1423100	401	PBANKA_1423000	1991
PbANKA_14_v3	903881	905414	1534	904311	343	96.0352	3.93425	94.2413	●
PbANKA_14_v3	907018	908410	1393	907842	497	195.513	5.50422	192.267	●	PBANKA_1423400	1327	PBANKA_1423300	1387
PbANKA_14_v3	911994	913113	1120	912467	354	91.6055	3.68961	89.8378	●	PBANKA_1423600	702	PBANKA_1423500	930
PbANKA_14_v3	932477	933729	1253	933209	499	160.943	4.50156	158.633	●
PbANKA_14_v3	959098	959988	891	959661	385	103.848	3.82394	102.007	●	PBANKA_1425100	606
PbANKA_14_v3	1033717	1035615	1899	1035006	485	180.889	5.19703	178.177	●
PbANKA_14_v3	1039144	1041285	2142	1039977	496	168.6	4.73356	166.163	●	PBANKA_1426900	1771	PBANKA_1427000	2058
PbANKA_14_v3	1044339	1044751	413	1044527	268	54.9315	3.08185	53.3873	●
PbANKA_14_v3	1046615	1050027	3413	1047121	498	182.804	5.11445	180.034	●	PBANKA_1427100	678	PBANKA_1427200	2749
PbANKA_14_v3	1057051	1058572	1522	1057963	475	184.807	5.43341	181.974	●	PBANKA_1427500	1114
PbANKA_14_v3	1066135	1066706	572	1066391	416	166.173	5.57417	163.778	●
PbANKA_14_v3	1088276	1088743	468	1088506	346	107.65	4.31787	105.787	●
PbANKA_14_v3	1092963	1093727	765	1093409	474	177.954	5.23048	175.321	●	PBANKA_1428100	245
PbANKA_14_v3	1095292	1095768	477	1095534	411	146.262	4.93391	144.126	●
PbANKA_14_v3	1127734	1128643	910	1128087	382	99.8309	3.72567	98.0143	●	PBANKA_1428900	692	PBANKA_1429000	4081
PbANKA_14_v3	1128959	1129552	594	1129239	413	121.662	4.12894	119.714	●	PBANKA_1428900	1844	PBANKA_1429000	2929
PbANKA_14_v3	1136461	1138556	2096	1138249	403	146.181	5.02821	144.046	●	PBANKA_1429300	159	PBANKA_1429200	2145
PbANKA_14_v3	1163482	1164794	1313	1164307	499	190.748	5.33711	187.702	●	PBANKA_1430300	362	PBANKA_1430200	1074
PbANKA_14_v3	1168964	1170709	1746	1169490	498	172.21	4.81454	169.703	●	PBANKA_1430600	373
PbANKA_14_v3	1171431	1172625	1195	1172110	418	108.215	3.70474	106.349	●	PBANKA_1430700	329
PbANKA_14_v3	1186629	1188249	1621	1187224	391	88.8242	3.34613	87.0721	●
PbANKA_14_v3	1211757	1213360	1604	1212476	489	178.826	5.0927	176.169	●	PBANKA_1432200	525
PbANKA_14_v3	1214061	1215559	1499	1215074	348	88.9788	3.65289	87.2258	●	PBANKA_1432400	910	PBANKA_1432300	1244
PbANKA_14_v3	1225911	1226648	738	1226222	458	175.865	5.35283	173.28	●	PBANKA_1432600	130
PbANKA_14_v3	1228914	1229409	496	1229198	298	68.8973	3.36758	67.2603	●	PBANKA_1432700	455	PBANKA_1432800	710
PbANKA_14_v3	1270261	1271095	835	1270624	415	136.895	4.5808	134.84	●	PBANKA_1434000	274
PbANKA_14_v3	1285530	1286923	1394	1286059	495	200.148	5.67264	196.658	●	PBANKA_1434400	389
PbANKA_14_v3	1317517	1318093	577	1317748	244	48.3808	3.00508	46.8842	●	PBANKA_1434900	405	PBANKA_1435000	1256
PbANKA_14_v3	1323154	1325377	2224	1323759	498	190.338	5.33605	187.309	●	PBANKA_1435200	279	PBANKA_1435300	2081
PbANKA_14_v3	1360408	1361104	697	1360751	281	56.2644	3.0375	54.7111		PBANKA_1436100	3733
PbANKA_14_v3	1369094	1370818	1725	1370148	498	196.932	5.53593	193.614	●	PBANKA_1436300	351	PBANKA_1436200	2692
PbANKA_14_v3	1384310	1386584	2275	1385862	500	181.797	5.06484	179.06	●	PBANKA_1436800	816
PbANKA_14_v3	1423940	1425478	1539	1424503	497	194.844	5.48375	191.629	●	PBANKA_1437600	1099
PbANKA_14_v3	1428547	1429541	995	1429159	500	184.234	5.13495	181.417	●	PBANKA_1437700	451	PBANKA_1437800	694
PbANKA_14_v3	1431041	1433809	2769	1431749	497	187.056	5.24954	184.154	●
PbANKA_14_v3	1439953	1441060	1108	1440377	365	93.1058	3.65022	91.3294	●
PbANKA_14_v3	1451764	1452390	627	1452011	253	54.261	3.17464	52.7216
PbANKA_14_v3	1481294	1482940	1647	1482411	490	188.674	5.37668	185.714	●	PBANKA_1439100	528	PBANKA_1439000	2489
PbANKA_14_v3	1485028	1487927	2900	1486035	500	174.73	4.86554	172.17	●	PBANKA_1439200	2284
PbANKA_14_v3	1505967	1506645	679	1506254	464	174.49	5.2372	171.935	●
PbANKA_14_v3	1569896	1570534	639	1570212	322	64.1247	3.03727	62.5179	●	PBANKA_1441600	893
PbANKA_14_v3	1573584	1574374	791	1574048	452	141.536	4.37072	139.444	●
PbANKA_14_v3	1594218	1594650	433	1594443	179	36.9266	3.05192	35.5261	●
PbANKA_14_v3	1643879	1644489	611	1644211	373	86.2861	3.38777	84.5484	●	PBANKA_1443100	430
PbANKA_14_v3	1685126	1685666	541	1685378	443	137.735	4.34044	135.673	●	PBANKA_1443800	61	PBANKA_1443900	4520
PbANKA_14_v3	1699950	1701371	1422	1700273	490	154.045	4.39382	151.826	●	PBANKA_1444200	189	PBANKA_1444300	250
PbANKA_14_v3	1724636	1726042	1407	1725077	299	62.855	3.14558	61.2565	●	PBANKA_1444800	1140	PBANKA_1444900	1387
PbANKA_14_v3	1731145	1732022	878	1731522	463	145.633	4.39102	143.504	●	PBANKA_1445000	555
PbANKA_14_v3	1748720	1749796	1077	1749176	499	178.698	4.98664	176.044	●	PBANKA_1445700	478
PbANKA_14_v3	1752995	1754183	1189	1753415	476	141.482	4.17395	139.39	●	PBANKA_1445800	1012
PbANKA_14_v3	1782757	1785431	2675	1783397	497	167.075	4.68285	164.665	●	PBANKA_1446400	2010	PBANKA_1446500	5412
PbANKA_14_v3	1807680	1809196	1517	1808181	498	162.64	4.55487	160.305	●	PBANKA_1447000	784
PbANKA_14_v3	1814335	1815913	1579	1815364	496	166.4	4.67345	164.001	●	PBANKA_1447200	305	PBANKA_1447300	749
PbANKA_14_v3	1817200	1817890	691	1817558	455	149.698	4.57866	147.529	●	PBANKA_1447400	200
PbANKA_14_v3	1840016	1842640	2625	1840331	367	84.4985	3.3747	82.7709	●	PBANKA_1447900	1917	PBANKA_1448000	3747
PbANKA_14_v3	1843005	1843769	765	1843481	436	133.993	4.29327	131.959	●	PBANKA_1448000	597	PBANKA_1447900	5067
PbANKA_14_v3	1851649	1852925	1277	1852667	447	145.447	4.52904	143.319	●
PbANKA_14_v3	1870776	1872342	1567	1871824	390	118.613	4.24242	116.685	●	PBANKA_1448500	716	PBANKA_1448400	1410
PbANKA_14_v3	1888412	1889092	681	1888791	309	73.1996	3.43272	71.5368	●	PBANKA_1448800	475
PbANKA_14_v3	1902713	1903684	972	1903110	423	102.497	3.5179	100.664	●	PBANKA_1449100	958
PbANKA_14_v3	1909423	1911353	1931	1909946	498	164.5	4.60454	162.133	●	PBANKA_1449300	316	PBANKA_1449400	2243
PbANKA_14_v3	1921378	1923177	1800	1921997	445	137.78	4.32431	135.718	●	PBANKA_1449700	375
PbANKA_14_v3	1932651	1934279	1629	1933656	497	172.658	4.83641	170.141	●
PbANKA_14_v3	1943682	1944901	1220	1944476	460	136.899	4.17583	134.844	●	PBANKA_1450300	517
PbANKA_14_v3	1969030	1969734	705	1969301	388	116.87	4.20532	114.953	●	PBANKA_1450800	2	PBANKA_1450900	1546
PbANKA_14_v3	1974153	1975961	1809	1974991	495	159.352	4.49287	157.063	●
PbANKA_14_v3	1976078	1977108	1031	1976781	315	65.7908	3.13572	64.1732	●	PBANKA_1451100	623
PbANKA_14_v3	1985223	1986594	1372	1985894	499	183.825	5.13358	181.022	●	PBANKA_1451500	300	PBANKA_1451600	1592
PbANKA_14_v3	1995333	1996598	1266	1996099	496	161.053	4.52963	158.741	●	PBANKA_1451700	592	PBANKA_1451800	763
PbANKA_14_v3	2011932	2013572	1641	2012443	497	160.668	4.51098	158.36	●	PBANKA_1452100	1196	PBANKA_1452200	1506
PbANKA_14_v3	2015679	2017360	1682	2015944	449	141.608	4.3991	139.514	●	PBANKA_1452300	1413
PbANKA_14_v3	2027499	2028620	1122	2028013	488	176.906	5.04689	174.297	●	PBANKA_1452700	325	PBANKA_1452800	830
PbANKA_14_v3	2044360	2046428	2069	2045552	489	140.061	4.04284	137.981	●	PBANKA_1453300	920
PbANKA_14_v3	2061231	2063932	2702	2061947	414	117.717	4.00408	115.794	●	PBANKA_1453700	3307
PbANKA_14_v3	2073421	2074579	1159	2073886	499	170.644	4.76214	168.169	●	PBANKA_1453900	256	PBANKA_1454000	854
PbANKA_14_v3	2082585	2083194	610	2082859	412	124.82	4.233	122.851	●	PBANKA_1454200	2326
PbANKA_14_v3	2131180	2134942	3763	2132120	453	175.441	5.40085	172.864	●	PBANKA_1454800	2462
PbANKA_14_v3	2138110	2139367	1258	2139061	428	157.286	5.10345	155.025	●	PBANKA_1455100	1230
PbANKA_14_v3	2155171	2156343	1173	2156088	339	81.4754	3.47878	79.7647	●	PBANKA_1455800	326	PBANKA_1455700	554
PbANKA_14_v3	2156827	2157261	435	2157048	274	59.6126	3.21463	58.0357	●
PbANKA_14_v3	2167679	2168927	1249	2168512	291	61.8713	3.16825	60.2792	●	PBANKA_1456200	1177
PbANKA_14_v3	2181234	2182971	1738	2181879	375	79.8443	3.19116	78.1427	●	PBANKA_1456900	462	PBANKA_1456800	2464
PbANKA_14_v3	2199777	2200614	838	2200034	358	111.167	4.31404	109.284	●	PBANKA_1457300	109	PBANKA_1457400	1120
PbANKA_14_v3	2222085	2223275	1191	2222969	466	177.215	5.30004	174.598	●	PBANKA_1457900	163	PBANKA_1457800	1853
PbANKA_14_v3	2232562	2234523	1962	2234012	497	180.876	5.06912	178.164		PBANKA_1458300	196	PBANKA_1458200	1650
PbANKA_14_v3	2265698	2267414	1717	2266304	437	145.707	4.63355	143.577	●	PBANKA_1459300	1076
PbANKA_14_v3	2271272	2271876	605	2271605	424	150.576	4.92722	148.397	●
PbANKA_14_v3	2273860	2277459	3600	2276446	496	195.437	5.51374	192.194		PBANKA_1459500	972
PbANKA_14_v3	2285342	2286490	1149	2285590	339	88.6301	3.71629	86.8791	●	PBANKA_1459900	1085
PbANKA_14_v3	2299025	2302070	3046	2301179	500	161.602	4.51057	159.281	●	PBANKA_1460500	795	PBANKA_1460400	2490
PbANKA_14_v3	2305809	2307158	1350	2306643	493	191.873	5.4397	188.782	●	PBANKA_1460700	473	PBANKA_1460600	490
PbANKA_14_v3	2317587	2319204	1618	2318585	405	130.8	4.48737	128.789	●	PBANKA_1461300	441	PBANKA_1461200	1162
PbANKA_14_v3	2322142	2325200	3059	2322789	480	151.35	4.40414	149.163	●	PBANKA_1461400	879	PBANKA_1461500	2323
PbANKA_14_v3	2339612	2340473	862	2340026	306	67.5849	3.25936	65.9561	●	PBANKA_1461800	1297
PbANKA_14_v3	2384399	2387195	2797	2385061	491	198.849	5.68174	195.435	●	PBANKA_1463000	1114	PBANKA_1463100	2933
PbANKA_14_v3	2394483	2395707	1225	2395135	499	184.75	5.16042	181.917	●	PBANKA_1463300	327
PbANKA_14_v3	2414436	2415402	967	2414910	488	190.812	5.46594	187.764	●	PBANKA_1463900	345	PBANKA_1464000	1583
PbANKA_14_v3	2439343	2439834	492	2439591	344	71.9085	3.14431	70.2532		PBANKA_1464800	3240

## Sheet: 2b
Supplementary file 2b. Peaks identified in ChIP-seq of PFG <Exp 2>
chr	start	end	length	abs_summit	pileup	-log10(p-value)	fold_enrichment	-log10(q-value)	common
PbANKA_01_v3	52975	55128	2154	54540	545	245.237	6.43412	242.646	●
PbANKA_01_v3	62569	63204	636	62854	237	68.3898	3.99184	66.7854	●
PbANKA_01_v3	110648	112221	1574	111058	513	262.161	7.54979	259.283	●
PbANKA_01_v3	137098	137538	441	137307	210	114.667	3.20771	112.867	●
PbANKA_01_v3	137902	139765	1864	138406	311	105.845	4.68506	104.079	●
PbANKA_01_v3	145167	147057	1891	146187	414	155.78	5.22661	153.817	●
PbANKA_01_v3	165170	166935	1766	165583	275	54.1135	3.00057	52.5855
PbANKA_01_v3	172807	174071	1265	173084	378	142.998	5.24393	141.087	●
PbANKA_01_v3	185747	186968	1222	186468	335	120.077	4.94312	118.256	●
PbANKA_01_v3	187708	188378	671	188050	453	185.681	5.74814	183.583	●
PbANKA_01_v3	203638	205829	2192	204937	541	253.552	6.76231	250.832	●
PbANKA_01_v3	210637	211467	831	211132	247	57.2154	3.35357	55.6696	●
PbANKA_01_v3	221779	222326	548	222033	310	104.981	4.662	103.219	●
PbANKA_01_v3	222619	224212	1594	222976	296	67.7368	3.34155	66.1355	●
PbANKA_01_v3	238983	240367	1385	239269	245	64.0586	3.68133	62.4763	●
PbANKA_01_v3	254491	256018	1528	254917	430	192.045	6.34073	189.913	●
PbANKA_01_v3	275137	275663	527	275411	388	147.909	5.29023	145.978	●
PbANKA_01_v3	284757	285470	714	285035	344	108.374	4.36701	106.598	●
PbANKA_01_v3	321615	322234	620	321947	370	108.751	4.11038	106.975	●
PbANKA_01_v3	330489	331153	665	330814	382	132.851	4.81302	130.98	●
PbANKA_01_v3	344951	346211	1261	345378	324	89.1648	3.87176	87.4675	●
PbANKA_01_v3	361560	363305	1746	362887	466	188.943	5.68241	186.828	●
PbANKA_01_v3	380979	381859	881	381505	423	148.688	4.87648	146.754	●
PbANKA_01_v3	400160	401218	1059	400788	504	202.814	5.64475	200.618	●
PbANKA_01_v3	408760	410670	1911	409150	309	74.5711	3.48141	72.9381	●
PbANKA_01_v3	416250	417727	1478	416688	542	208.836	5.39155	206.599	●
PbANKA_01_v3	427470	429853	2384	428228	544	278.136	7.56526	274.86	●
PbANKA_01_v3	437441	439643	2203	438483	395	143.505	5.0338	141.592
PbANKA_01_v3	439733	442039	2307	440883	526	228.338	6.16018	225.946	●
PbANKA_01_v3	454511	456256	1746	454833	449	162.127	5.01756	160.137	●
PbANKA_01_v3	462803	464085	1283	463503	276	72.5499	3.71134	70.9262	●
PbANKA_02_v3	23917	24263	347	24140	137	28.7557	3.04973	27.4159
PbANKA_02_v3	85068	86182	1115	85581	536	233.111	6.1761	230.669	●
PbANKA_02_v3	87688	88787	1100	88174	542	257.636	6.8833	254.842	●
PbANKA_02_v3	97437	98725	1289	98430	358	114.987	4.45083	113.186	●
PbANKA_02_v3	112400	113413	1014	112837	539	218.767	5.70676	216.46	●
PbANKA_02_v3	134432	135543	1112	134994	536	271.607	7.47341	268.515	●
PbANKA_02_v3	146700	149306	2607	148757	509	230.011	6.45746	227.602	●
PbANKA_02_v3	155027	156243	1217	155480	542	279.714	7.65964	276.388	●
PbANKA_02_v3	157690	158992	1303	158670	351	104.406	4.14841	102.646	●
PbANKA_02_v3	169215	170373	1159	169514	398	113.444	4.00901	111.65	●
PbANKA_02_v3	170889	171500	612	171240	391	125.73	4.46538	123.887	●
PbANKA_02_v3	180195	181165	971	180819	396	110.587	3.93913	108.804	●
PbANKA_02_v3	202435	204085	1651	203185	518	239.455	6.64162	236.943	●
PbANKA_02_v3	255653	256527	875	256141	238	51.7031	3.19728	50.1895	●
PbANKA_02_v3	290743	291964	1222	291347	462	210.827	6.51964	208.578	●
PbANKA_02_v3	322893	325152	2260	324596	543	284.403	7.8143	280.924	●
PbANKA_02_v3	326725	330489	3765	327564	545	273.567	7.38368	270.426	●
PbANKA_02_v3	346177	346652	476	346408	216	44.2204	3.05806	42.756	●
PbANKA_02_v3	358692	360641	1950	359166	472	220.96	6.73111	218.635	●
PbANKA_02_v3	362624	363662	1039	363375	325	111.539	4.72966	109.751	●
PbANKA_02_v3	393223	394266	1044	393583	291	70.6872	3.49308	69.0719	●
PbANKA_02_v3	411851	412641	791	412190	366	117.031	4.43475	115.222	●
PbANKA_02_v3	415025	415867	843	415293	286	78.6845	3.8572	77.0336	●
PbANKA_02_v3	435740	436348	609	436083	306	91.4802	4.1514	89.7731	●
PbANKA_02_v3	444266	445988	1723	444778	458	156.563	4.752	154.597	●
PbANKA_02_v3	513507	514816	1310	514315	547	281.337	7.6265	277.965	●
PbANKA_02_v3	537741	538366	626	537990	252	56.4117	3.27275	54.8701	●
PbANKA_02_v3	540995	542841	1847	542467	429	188.057	6.2014	185.947	●
PbANKA_02_v3	550155	552248	2094	550943	297	62.8848	3.1608	61.3086	●
PbANKA_03_v3	27373	28220	848	27625	254	64.3332	3.59357	62.7494	●
PbANKA_03_v3	40600	41295	696	40850	227	47.8082	3.12357	46.3198	●
PbANKA_03_v3	42965	44063	1099	43506	305	74.6868	3.51934	73.0532	●
PbANKA_03_v3	44412	45086	675	44675	303	62.5313	3.10684	60.9569
PbANKA_03_v3	47347	47859	513	47578	233	49.5257	3.14642	48.026
PbANKA_03_v3	53546	54953	1408	54342	522	281.528	8.12685	278.151	●
PbANKA_03_v3	56066	57013	948	56333	335	126.703	5.22485	124.857	●
PbANKA_03_v3	66524	70058	3535	68849	524	243.439	6.68433	240.874	●
PbANKA_03_v3	87664	88254	591	88010	255	69.8273	3.8283	68.216
PbANKA_03_v3	106573	107925	1353	107563	527	243.781	6.64976	241.211	●
PbANKA_03_v3	117186	118512	1327	117706	398	143.405	4.99247	141.492	●
PbANKA_03_v3	133549	134366	818	133954	448	141.966	4.41833	140.059	●
PbANKA_03_v3	136171	136964	794	136678	311	98.1776	4.36294	96.4436	●
PbANKA_03_v3	146946	147436	491	147166	228	51.0861	3.26416	49.5765
PbANKA_03_v3	192009	193509	1501	192517	507	210.364	5.84257	208.117	●
PbANKA_03_v3	226262	226745	484	226500	307	95.6008	4.307	93.8773	●
PbANKA_03_v3	238759	239373	615	239110	240	55.5526	3.34857	54.0161	●
PbANKA_03_v3	241394	243787	2394	243267	535	212.459	5.56982	210.198	●
PbANKA_03_v3	253838	255778	1941	255236	335	91.3311	3.84495	89.6247	●
PbANKA_03_v3	258422	259664	1243	258897	514	218.543	6.01002	216.237	●
PbANKA_03_v3	295110	295814	705	295430	405	137.046	4.69208	135.159	●
PbANKA_03_v3	304792	305838	1047	305252	476	191.362	5.63169	189.233	●
PbANKA_03_v3	327512	328290	779	327824	314	77.2538	3.53493	75.609	●
PbANKA_03_v3	341791	342492	702	342211	260	64.7599	3.54941	63.1738
PbANKA_03_v3	352640	353364	725	352966	347	105.933	4.24451	104.167
PbANKA_03_v3	353489	354993	1505	354068	536	262.176	7.13669	259.297	●
PbANKA_03_v3	368630	369736	1107	369413	410	174.029	5.96584	171.987	●
PbANKA_03_v3	375171	375914	744	375536	332	71.1783	3.19769	69.5607	●
PbANKA_03_v3	377925	378406	482	378161	239	66.4373	3.86812	64.8426	●
PbANKA_03_v3	384111	384673	563	384376	248	51.1788	3.08896	49.6686
PbANKA_03_v3	390138	390707	570	390403	340	117.468	4.76694	115.658	●
PbANKA_03_v3	401212	401949	738	401660	378	134.194	4.91166	132.318	●
PbANKA_03_v3	453520	454612	1093	454046	504	255.193	7.45459	252.444	●
PbANKA_03_v3	463254	464628	1375	464264	356	101.247	3.99082	99.5002	●
PbANKA_03_v3	482671	483505	835	483072	232	52.599	3.2942	51.0801
PbANKA_03_v3	494001	496167	2167	495521	520	237.999	6.5616	235.504	●
PbANKA_03_v3	508716	509460	745	509162	404	162.111	5.59779	160.122	●
PbANKA_03_v3	535255	536210	956	535948	298	82.025	3.86339	80.3593	●
PbANKA_03_v3	549655	550811	1157	549943	232	47.4581	3.06388	45.972
PbANKA_03_v3	560935	562237	1303	561411	516	247.029	6.93762	244.411	●
PbANKA_04_v3	38512	39911	1400	38981	328	106.811	4.49806	105.042	●
PbANKA_04_v3	46220	47661	1442	47227	497	219.291	6.27193	216.98	●
PbANKA_04_v3	50883	52585	1703	51519	366	100.726	3.88382	98.9814	●
PbANKA_04_v3	61822	62453	632	62104	407	148.459	5.05832	146.526	●
PbANKA_04_v3	66406	67281	876	66706	366	120.264	4.55001	118.443	●
PbANKA_04_v3	73092	76942	3851	74120	538	249.767	6.68244	247.11	●
PbANKA_04_v3	79857	81561	1705	80352	524	245.501	6.75464	242.906	●
PbANKA_04_v3	93321	94924	1604	94021	537	290.148	8.15336	286.456	●
PbANKA_04_v3	98375	99563	1189	98982	498	244.359	7.15326	241.781	●
PbANKA_04_v3	101885	103061	1177	102729	484	214.699	6.30805	212.422	●
PbANKA_04_v3	137072	137524	453	137301	231	56.2973	3.47656	54.7563	●
PbANKA_04_v3	138160	140364	2205	139554	327	101.786	4.3131	100.036	●
PbANKA_04_v3	163354	164161	808	163761	312	91.7364	4.09329	90.0283	●
PbANKA_04_v3	171528	173236	1709	171925	426	177.331	5.84031	175.274	●
PbANKA_04_v3	178905	180630	1726	180063	474	190.394	5.6258	188.271	●
PbANKA_04_v3	185080	185675	596	185378	236	51.8715	3.2231	50.3569
PbANKA_04_v3	194554	196394	1841	194968	344	109.492	4.40868	107.712	●
PbANKA_04_v3	198888	201252	2365	200859	543	265.551	7.1371	262.602	●
PbANKA_04_v3	202465	203107	643	202849	240	47.9616	3.01927	46.4721
PbANKA_04_v3	214769	216109	1341	215261	527	249.452	6.84262	246.8	●
PbANKA_04_v3	259286	259751	466	259504	242	64.3987	3.73264	62.8146	●
PbANKA_04_v3	262354	263298	945	262816	484	242.219	7.33346	239.672	●
PbANKA_04_v3	264655	265715	1061	265229	533	272.579	7.56407	269.463	●
PbANKA_04_v3	271523	272327	805	271934	229	49.5583	3.18455	48.0584	●
PbANKA_04_v3	276658	277674	1017	277265	353	91.1495	3.68297	89.4438	●
PbANKA_04_v3	298767	299859	1093	299316	526	198.59	5.2729	196.419	●
PbANKA_04_v3	310759	312132	1374	311472	520	207.221	5.58792	204.995	●
PbANKA_04_v3	340366	341893	1528	340845	372	113.474	4.24894	111.68
PbANKA_04_v3	342077	344312	2236	343378	479	177.854	5.17143	175.795	●
PbANKA_04_v3	354779	356562	1784	355504	491	170.795	4.84147	168.768	●
PbANKA_04_v3	358717	360073	1357	359400	539	268.237	7.29914	265.231	●
PbANKA_04_v3	365655	367605	1951	366187	518	257.67	7.28802	254.875	●
PbANKA_04_v3	381411	382584	1174	381948	442	162.054	5.095	160.065	●
PbANKA_04_v3	387040	388467	1428	387827	350	69.5908	3.04008	67.9806
PbANKA_04_v3	459046	461159	2114	460294	502	227.84	6.48965	225.452	●
PbANKA_04_v3	476830	478728	1899	477961	542	217.005	5.62164	214.712	●
PbANKA_04_v3	478880	482146	3267	480644	258	51.2867	3.01534	49.7758
PbANKA_04_v3	483754	485058	1305	484553	545	247.277	6.49898	244.655	●
PbANKA_04_v3	501780	503843	2064	503437	519	199.856	5.38352	197.677	●
PbANKA_04_v3	536548	537247	700	536918	250	65.204	3.67648	63.6157
PbANKA_04_v3	619278	619759	482	619515	255	71.3461	3.89794	69.7278	●
PbANKA_04_v3	638201	638812	612	638489	430	196.824	6.53178	194.664	●
PbANKA_04_v3	645923	647946	2024	646509	542	249.948	6.62867	247.288	●
PbANKA_04_v3	653101	653926	826	653556	311	67.7892	3.23011	66.1877
PbANKA_04_v3	662599	663712	1114	663093	535	276.81	7.68366	273.577	●
PbANKA_04_v3	666070	667718	1649	666479	262	57.8344	3.24377	56.2853
PbANKA_04_v3	672520	673101	582	672824	287	86.6229	4.17876	84.9365	●
PbANKA_05_v3	68630	69161	532	68928	242	61.1452	3.58099	59.578
PbANKA_05_v3	74542	75352	811	74951	437	186.824	6.02532	184.72	●
PbANKA_05_v3	94473	95964	1492	95130	423	170.647	5.63764	168.621	●
PbANKA_05_v3	98705	100002	1298	99411	540	252.134	6.73054	249.439	●
PbANKA_05_v3	126259	127168	910	126710	519	280.244	8.13914	276.902	●
PbANKA_05_v3	139326	142964	3639	142030	365	127.975	4.84636	126.123	●
PbANKA_05_v3	143143	144117	975	143478	233	48.0467	3.08115	46.5568
PbANKA_05_v3	145443	146382	940	145895	400	109.751	3.88193	107.971	●
PbANKA_05_v3	156207	156674	468	156475	223	56.0528	3.55626	54.5133
PbANKA_05_v3	172558	173574	1017	173068	426	162.142	5.29388	160.153	●
PbANKA_05_v3	176350	177924	1575	176897	542	281.824	7.7375	278.438	●
PbANKA_05_v3	199684	202148	2465	201206	497	217.354	6.20639	215.058	●
PbANKA_05_v3	212463	213733	1271	212756	380	126.958	4.62737	125.11	●
PbANKA_05_v3	221684	222784	1101	222241	546	211.651	5.42747	209.396	●
PbANKA_05_v3	279085	279801	717	279460	469	184.116	5.48487	182.026	●
PbANKA_05_v3	286804	288061	1258	287381	264	59.1144	3.2781	57.5583	●
PbANKA_05_v3	292849	293953	1105	293250	533	231.678	6.17136	229.252	●
PbANKA_05_v3	298226	299632	1407	298502	438	180.346	5.77272	178.275	●
PbANKA_05_v3	346459	347643	1185	346942	432	119.724	3.92116	117.905	●
PbANKA_05_v3	364230	364978	749	364635	484	196.256	5.68775	194.099	●
PbANKA_05_v3	365693	366738	1046	366275	444	143.822	4.50919	141.908	●
PbANKA_05_v3	379056	380143	1088	379689	359	102.504	4.00521	100.752	●
PbANKA_05_v3	412795	414782	1988	413863	525	246.337	6.76751	243.73	●
PbANKA_05_v3	415551	416646	1096	416178	411	181.329	6.24159	179.253	●
PbANKA_05_v3	419003	421020	2018	420151	319	111.393	4.80851	109.607	●
PbANKA_05_v3	438640	440257	1618	439205	528	253.202	6.9562	250.487	●
PbANKA_05_v3	448060	448462	403	448252	180	38.0337	3.10338	36.6144
PbANKA_05_v3	464859	466721	1863	465817	468	227.818	7.06943	225.431	●
PbANKA_05_v3	469961	471966	2006	471469	516	241.697	6.75032	239.158	●
PbANKA_05_v3	490039	493211	3173	490844	522	281.166	8.11237	277.798	●
PbANKA_05_v3	500598	501301	704	500927	330	124.665	5.216	122.826	●
PbANKA_05_v3	515263	517397	2135	516787	310	88.6426	3.99473	86.9476	●
PbANKA_05_v3	532916	533355	440	533144	194	39.4643	3.03279	38.0339
PbANKA_05_v3	547469	549427	1959	548241	360	90.1717	3.5969	88.47	●
PbANKA_05_v3	558634	564144	5511	562671	537	284.32	7.92828	280.846	●
PbANKA_05_v3	566966	567559	594	567173	213	42.6984	3.0134	41.2445
PbANKA_05_v3	570852	571441	590	571139	302	97.4902	4.45056	95.7591	●
PbANKA_05_v3	575294	576176	883	575684	266	71.9192	3.79339	70.2982	●
PbANKA_05_v3	590811	592150	1340	591122	358	92.954	3.70064	91.241	●
PbANKA_05_v3	618257	618917	661	618576	370	125.633	4.69727	123.791	●
PbANKA_05_v3	627078	629149	2072	628021	531	231.534	6.19368	229.109
PbANKA_05_v3	642953	644240	1288	643601	536	281.463	7.83934	278.089	●
PbANKA_05_v3	649758	650806	1049	650495	369	130.299	4.88224	128.438	●
PbANKA_05_v3	662479	663061	583	662740	221	47.8646	3.18241	46.3758
PbANKA_05_v3	675828	676786	959	676461	419	155.51	5.15352	153.548	●
PbANKA_05_v3	713558	714455	898	714041	246	50.9163	3.09444	49.4077	●
PbANKA_05_v3	720724	722350	1627	721864	531	227.26	6.06015	224.878	●
PbANKA_05_v3	725491	727436	1946	726581	517	280.388	8.188	277.043	●
PbANKA_05_v3	729624	731519	1896	730767	547	263.824	7.01273	260.912	●
PbANKA_05_v3	764861	766717	1857	766310	225	50.7659	3.27917	49.2582	●
PbANKA_05_v3	791501	793786	2286	792975	535	293.261	8.31846	289.426	●
PbANKA_05_v3	796198	797456	1259	797026	213	46.4704	3.19473	44.9909
PbANKA_05_v3	800053	803500	3448	801023	332	95.1747	4.01098	93.4529	●
PbANKA_05_v3	827880	830599	2720	828717	539	297.427	8.3985	293.406	●
PbANKA_05_v3	844428	847572	3145	845150	533	231.293	6.1593	228.871	●
PbANKA_05_v3	851084	852170	1087	851826	306	88.0479	4.01483	86.3555	●
PbANKA_05_v3	853280	854287	1008	853984	273	64.5205	3.41476	62.9357	●
PbANKA_05_v3	869439	871359	1921	870773	480	202.064	5.93253	199.873	●
PbANKA_05_v3	873143	873840	698	873437	277	65.3361	3.41114	63.7471	●
PbANKA_05_v3	878514	880568	2055	879577	509	231.014	6.49162	228.595	●
PbANKA_05_v3	881931	882866	936	882430	517	277.131	8.05634	273.889	●
PbANKA_05_v3	892049	893857	1809	892993	538	230.908	6.0818	228.491	●
PbANKA_05_v3	908931	909680	750	909288	454	168.352	5.15839	166.336	●
PbANKA_06_v3	83919	84681	763	84262	374	152.423	5.6831	150.473	●
PbANKA_06_v3	94252	94822	571	94597	249	59.178	3.41939	57.6215	●
PbANKA_06_v3	97980	99261	1282	98404	474	187.852	5.54322	185.742	●
PbANKA_06_v3	105855	106842	988	106473	497	260.254	7.79479	257.412	●
PbANKA_06_v3	130128	134074	3947	132588	491	241.937	7.18954	239.394	●
PbANKA_06_v3	135047	136311	1265	135554	527	269.697	7.56898	266.655	●
PbANKA_06_v3	144096	145715	1620	144606	520	244.288	6.77628	241.71	●
PbANKA_06_v3	149199	151293	2095	150575	414	151.177	5.06611	149.233	●
PbANKA_06_v3	151382	152901	1520	151859	347	107.427	4.29872	105.655
PbANKA_06_v3	153004	154551	1548	153409	257	65.6286	3.61828	64.0382
PbANKA_06_v3	166855	167664	810	167280	475	208.444	6.22494	206.21	●
PbANKA_06_v3	169926	172612	2687	171158	528	269.763	7.55272	266.72	●
PbANKA_06_v3	173757	176995	3239	176595	322	73.5375	3.344	71.909	●
PbANKA_06_v3	178070	179208	1139	178633	382	147.519	5.36148	145.589	●
PbANKA_06_v3	184858	186787	1930	186075	517	228.538	6.29128	226.144	●
PbANKA_06_v3	190533	192313	1781	191171	538	256.188	6.89756	253.422	●
PbANKA_06_v3	197747	198777	1031	198504	203	45.6719	3.26014	44.1977	●
PbANKA_06_v3	215791	218402	2612	217428	420	141.064	4.66213	139.161	●
PbANKA_06_v3	225228	226007	780	225564	397	178.092	6.36047	176.031	●
PbANKA_06_v3	259353	260759	1407	260004	537	305.349	8.76603	300.889	●
PbANKA_06_v3	288532	290090	1559	289361	300	90.0692	4.16471	88.3679	●
PbANKA_06_v3	296334	297388	1055	296860	537	288.591	8.09268	284.967	●
PbANKA_06_v3	305264	306280	1017	305806	529	258.526	7.1265	255.716	●
PbANKA_06_v3	350197	350888	692	350587	267	68.7047	3.64468	67.0988	●
PbANKA_06_v3	358192	360040	1849	359533	435	166.414	5.3253	164.406	●
PbANKA_06_v3	360164	362031	1868	361701	360	132.355	5.08335	130.486
PbANKA_06_v3	366549	368745	2197	367871	304	88.0451	4.03679	86.3528	●
PbANKA_06_v3	370638	372848	2211	372252	531	264.889	7.31944	261.954	●
PbANKA_06_v3	376502	377327	826	376843	295	98.5784	4.59541	96.8427	●
PbANKA_06_v3	378019	379719	1701	379479	250	71.2627	3.95749	69.6447
PbANKA_06_v3	399315	400929	1615	399950	449	194.425	6.1198	192.279	●
PbANKA_06_v3	404567	406717	2151	405343	488	224.762	6.6026	222.404	●
PbANKA_06_v3	406921	407961	1041	407633	428	176.854	5.79247	174.799
PbANKA_06_v3	410104	410604	501	410345	215	45.2276	3.11512	43.7564
PbANKA_06_v3	415029	415894	866	415322	215	44.4655	3.07886	42.9995
PbANKA_06_v3	424749	426484	1736	425809	536	261.029	7.09661	258.173	●
PbANKA_06_v3	428731	429974	1244	429664	311	123.598	5.49669	121.764	●
PbANKA_06_v3	442399	442967	569	442713	395	160.067	5.65569	158.086	●
PbANKA_06_v3	445583	448162	2580	446170	539	248.506	6.62596	245.867	●
PbANKA_06_v3	451952	453594	1643	453077	525	238.317	6.49749	235.819	●
PbANKA_06_v3	462744	464036	1293	463518	540	249.334	6.63823	246.683	●
PbANKA_06_v3	466889	468368	1480	467808	325	86.1825	3.7552	84.498	●
PbANKA_06_v3	507141	509069	1929	508459	328	99.3982	4.2102	97.6593	●
PbANKA_06_v3	512445	513585	1141	512958	527	279.022	7.92446	275.719	●
PbANKA_06_v3	517273	518762	1490	518358	253	51.2945	3.05381	49.7835
PbANKA_06_v3	533562	535061	1500	534534	545	284.579	7.78267	281.093	●
PbANKA_06_v3	542631	543722	1092	543183	540	243.194	6.43946	240.632	●
PbANKA_06_v3	549973	550963	991	550217	309	61.276	3.02555	59.7082
PbANKA_06_v3	556469	557592	1124	557080	335	112.937	4.65221	111.144	●
PbANKA_06_v3	599609	600286	678	599957	458	204.774	6.3593	202.565	●
PbANKA_06_v3	619129	620177	1049	619625	527	225.977	6.07259	223.607	●
PbANKA_06_v3	710809	712058	1250	711462	527	225.977	6.07259	223.607	●
PbANKA_06_v3	725022	726383	1362	725929	355	101.183	3.99801	99.4362	●
PbANKA_06_v3	766071	766724	654	766374	293	73.6024	3.58588	71.9737	●
PbANKA_06_v3	773036	775668	2633	774540	537	268.193	7.33245	265.187	●
PbANKA_06_v3	786528	787688	1161	787156	528	259.971	7.19515	257.135	●
PbANKA_06_v3	789223	790411	1189	789937	544	275.132	7.45705	271.948	●
PbANKA_06_v3	791949	793792	1844	793369	542	267.449	7.2199	264.46	●
PbANKA_06_v3	811401	812772	1372	812248	538	243.116	6.46541	240.556	●
PbANKA_06_v3	826179	827367	1189	826692	546	279.228	7.56842	275.918	●
PbANKA_06_v3	837119	837754	636	837427	340	106.442	4.34047	104.674	●
PbANKA_06_v3	853773	854395	623	854081	289	61.437	3.16733	59.8683
PbANKA_06_v3	854918	855762	845	855470	234	52.5068	3.27049	50.9883	●
PbANKA_06_v3	864117	865649	1533	864522	512	255.872	7.33029	253.111
PbANKA_06_v3	865873	868120	2248	867371	544	252.862	6.6942	250.155	●
PbANKA_06_v3	869767	870746	980	870270	515	231.873	6.43072	229.445	●
PbANKA_06_v3	892661	893600	940	893070	525	227.224	6.13839	224.843	●
PbANKA_06_v3	907048	908338	1291	907307	269	79.8142	4.10752	78.1584	●
PbANKA_06_v3	917918	918888	971	918530	405	152.793	5.23817	150.842	●
PbANKA_07_v3	83975	85003	1029	84674	250	52.0686	3.10934	50.5528
PbANKA_07_v3	120084	122166	2083	120483	260	68.8443	3.72639	67.2378	●
PbANKA_07_v3	126753	128005	1253	127609	467	205.91	6.25756	203.693	●
PbANKA_07_v3	141084	142511	1428	141877	530	254.9	6.9825	252.156	●
PbANKA_07_v3	142732	143788	1057	143383	298	61.6018	3.10902	60.0323
PbANKA_07_v3	145278	146853	1576	145831	536	274.02	7.56165	270.865
PbANKA_07_v3	154604	155163	560	154895	230	57.9912	3.56882	56.4412	●
PbANKA_07_v3	164885	166203	1319	165539	526	239.855	6.53367	237.338	●
PbANKA_07_v3	170625	171834	1210	171228	545	274.74	7.42536	271.568	●
PbANKA_07_v3	183420	184349	930	183867	289	70.7275	3.51249	69.112	●
PbANKA_07_v3	186188	186918	731	186535	527	248.012	6.79324	245.38	●
PbANKA_07_v3	232036	233841	1806	232801	543	302.453	8.51242	298.192	●
PbANKA_07_v3	235270	236343	1074	235800	529	284.135	8.08348	280.668	●
PbANKA_07_v3	277596	278060	465	277817	243	61.4514	3.58395	59.8826	●
PbANKA_07_v3	280305	281629	1325	280789	536	263.413	7.18015	260.51	●
PbANKA_07_v3	288791	289932	1142	289229	535	250.438	6.75051	247.77	●
PbANKA_07_v3	292186	293000	815	292584	344	92.9908	3.82051	91.2777	●
PbANKA_07_v3	294596	296723	2128	295906	517	259.432	7.37149	256.605	●
PbANKA_07_v3	306377	308965	2589	307460	521	241.944	6.68001	239.401	●
PbANKA_07_v3	310014	314095	4082	313258	518	259.389	7.35159	256.563	●
PbANKA_07_v3	339163	340345	1183	339627	392	137.212	4.84716	135.324	●
PbANKA_07_v3	348188	349260	1073	348790	539	257.033	6.91035	254.251	●
PbANKA_07_v3	360415	361555	1141	360808	526	247.174	6.78037	244.554	●
PbANKA_07_v3	369184	371505	2322	370976	536	263.413	7.18015	260.51	●
PbANKA_07_v3	373821	375183	1363	374936	235	47.0289	3.02008	45.5457
PbANKA_07_v3	401973	402513	541	402244	277	71.1197	3.64233	69.5023	●
PbANKA_07_v3	406157	407055	899	406684	426	168.95	5.53371	166.931	●
PbANKA_07_v3	418434	420082	1649	418813	526	288.04	8.30319	284.434	●
PbANKA_07_v3	446643	447056	414	446831	231	51.2662	3.24319	49.7553
PbANKA_07_v3	457103	458981	1879	457451	308	62.686	3.07878	61.1108	●
PbANKA_07_v3	465789	467072	1284	466258	455	201.219	6.27579	199.033	●
PbANKA_07_v3	468826	471230	2405	470297	529	234.451	6.31395	231.994	●
PbANKA_07_v3	471660	473053	1394	472592	341	108.146	4.39291	106.371	●
PbANKA_07_v3	476489	478056	1568	477437	270	67.9498	3.58243	66.3476	●
PbANKA_07_v3	479555	480607	1053	480020	395	150.687	5.29678	148.745	●
PbANKA_07_v3	481628	485704	4077	484963	546	285.133	7.78418	281.626	●
PbANKA_07_v3	490687	493316	2630	492374	539	206.494	5.35802	204.273	●
PbANKA_07_v3	495402	496078	677	495653	310	91.6478	4.11223	89.9401	●
PbANKA_07_v3	504149	505169	1021	504792	479	229.246	6.92249	226.845	●
PbANKA_07_v3	511836	513155	1320	512471	527	263.329	7.33395	260.427	●
PbANKA_07_v3	522590	523244	655	523008	288	59.7431	3.11363	58.1836
PbANKA_07_v3	532546	533386	841	532973	375	128.436	4.73874	126.583	●
PbANKA_07_v3	579338	579936	599	579622	440	184.66	5.89959	182.567	●
PbANKA_07_v3	591704	592885	1182	592206	540	229.685	6.01895	227.28	●
PbANKA_07_v3	597947	598796	850	598360	513	202.809	5.53774	200.613	●
PbANKA_07_v3	610323	611470	1148	610598	402	154.161	5.32871	152.205	●
PbANKA_07_v3	612803	614246	1444	613623	543	259.078	6.91612	256.259	●
PbANKA_07_v3	621915	622699	785	622171	307	75.7951	3.54235	74.1566	●
PbANKA_07_v3	628598	629199	602	628965	237	50.6377	3.15963	49.1309
PbANKA_07_v3	636792	637687	896	637177	525	247.771	6.81671	245.142	●
PbANKA_07_v3	642517	645594	3078	643031	528	199.256	5.2708	197.081	●
PbANKA_07_v3	670120	671399	1280	670689	538	227.197	5.96885	224.817	●
PbANKA_07_v3	679040	681060	2021	680026	525	232.041	6.29232	229.611	●
PbANKA_07_v3	749320	752791	3472	750059	469	206.939	6.26348	204.715	●
PbANKA_07_v3	763826	765254	1429	764335	544	255.834	6.79213	253.074	●
PbANKA_07_v3	766208	767792	1585	766923	539	272.047	7.43538	268.945	●
PbANKA_07_v3	783835	784691	857	784167	410	162.984	5.54255	160.991	●
PbANKA_07_v3	784947	786506	1560	785362	541	248.086	6.58277	245.453	●
PbANKA_07_v3	787739	792261	4523	789549	528	257.663	7.1129	254.868
PbANKA_08_v3	32703	33627	925	32953	252	51.5684	3.07277	50.0558
PbANKA_08_v3	52975	55298	2324	53688	512	245.445	6.94821	242.85	●
PbANKA_08_v3	118947	120507	1561	119907	242	61.1452	3.58099	59.578
PbANKA_08_v3	125112	125484	373	125319	181	38.2653	3.10523	36.844
PbANKA_08_v3	141298	143774	2477	142589	223	44.9413	3.02903	43.472
PbANKA_08_v3	146342	148366	2025	147041	525	294.56	8.59379	290.668	●
PbANKA_08_v3	176321	177355	1035	177026	369	138.713	5.20578	136.819	●
PbANKA_08_v3	206976	207735	760	207279	258	70.0819	3.80427	68.4694	●
PbANKA_08_v3	210900	212655	1756	211725	502	217.089	6.12644	214.796	●
PbANKA_08_v3	218594	219408	815	218916	323	85.3675	3.74442	83.6865	●
PbANKA_08_v3	223228	223920	693	223529	232	57.2124	3.50881	55.6666
PbANKA_08_v3	227111	228111	1001	227299	270	54.6907	3.05783	53.1592	●
PbANKA_08_v3	229148	229612	465	229393	272	57.6431	3.15502	56.0949	●
PbANKA_08_v3	278726	279488	763	279249	299	77.0799	3.66225	75.4358	●
PbANKA_08_v3	291264	292512	1249	291636	340	133.938	5.45957	132.063	●
PbANKA_08_v3	365902	367614	1713	366458	404	163.122	5.63637	161.128	●
PbANKA_08_v3	380492	382274	1783	380815	227	50.5435	3.2489	49.0372
PbANKA_08_v3	391156	394096	2941	392289	502	250.847	7.32569	248.173	●
PbANKA_08_v3	394833	395381	549	395064	177	41.522	3.34297	40.0764
PbANKA_08_v3	413251	415070	1820	414083	533	265.434	7.30381	262.488	●
PbANKA_08_v3	435027	436443	1417	435489	342	124.824	5.03809	122.985	●
PbANKA_08_v3	439935	442648	2714	442267	496	270.558	8.24534	267.494	●
PbANKA_08_v3	453781	455235	1455	454250	263	64.1613	3.49414	62.5785	●
PbANKA_08_v3	469062	469772	711	469413	199	40.3876	3.03099	38.9504
PbANKA_08_v3	480912	482454	1543	481725	541	304.849	8.65386	300.421	●
PbANKA_08_v3	486911	489550	2640	488728	374	130.459	4.82474	128.598	●
PbANKA_08_v3	498802	499286	485	499039	285	104.612	5.03863	102.851	●
PbANKA_08_v3	533754	534344	591	534061	331	126.956	5.30089	125.108	●
PbANKA_08_v3	541642	542300	659	541897	165	34.233	3.05305	32.8444
PbANKA_08_v3	547806	548525	720	548138	227	59.7184	3.68977	58.159
PbANKA_08_v3	567032	568610	1579	567538	515	264.583	7.60407	261.655	●
PbANKA_08_v3	570408	571242	835	571003	268	77.7131	4.02552	76.0663	●
PbANKA_08_v3	575105	576009	905	575585	541	249.121	6.61646	246.473	●
PbANKA_08_v3	583107	584004	898	583373	325	126.343	5.37461	124.498	●
PbANKA_08_v3	597417	598848	1432	597971	524	249.6	6.89615	246.945	●
PbANKA_08_v3	611366	611994	629	611739	256	71.1778	3.8779	69.5602	●
PbANKA_08_v3	644918	646220	1303	645688	440	205.098	6.68333	202.886	●
PbANKA_08_v3	652401	654196	1796	653241	211	42.4757	3.0209	41.0234
PbANKA_08_v3	654945	656769	1825	656175	518	224.515	6.14692	222.16	●
PbANKA_08_v3	659784	661338	1555	660414	533	275.027	7.65499	271.846	●
PbANKA_08_v3	665778	667357	1580	666650	447	204.533	6.5356	202.325	●
PbANKA_08_v3	689427	690203	777	689853	226	57.6871	3.60126	56.1387
PbANKA_08_v3	694282	696704	2423	695297	509	272.226	8.02802	269.12	●
PbANKA_08_v3	701633	702885	1253	702383	519	266.261	7.59117	263.298	●
PbANKA_08_v3	707485	708270	786	707818	255	61.0787	3.44224	59.5119	●
PbANKA_08_v3	754586	755284	699	754941	347	106.035	4.24821	104.269	●
PbANKA_08_v3	760524	762097	1574	761174	403	151.722	5.22605	149.775	●
PbANKA_08_v3	767100	767834	735	767452	329	100.03	4.22299	98.2881	●
PbANKA_08_v3	775210	776621	1412	776102	346	118.951	4.74611	117.135	●
PbANKA_08_v3	788034	790060	2027	788756	546	243.588	6.36831	241.022	●
PbANKA_08_v3	829815	830299	485	830076	235	70.0086	4.10296	68.3965	●
PbANKA_08_v3	839285	840684	1400	839766	536	281.463	7.83934	278.089	●
PbANKA_08_v3	840940	841691	752	841379	267	61.1626	3.33417	59.5954
PbANKA_08_v3	846741	848715	1975	848162	229	49.9179	3.2009	48.4157
PbANKA_08_v3	852157	854115	1959	853261	543	249.736	6.60706	247.079	●
PbANKA_08_v3	857927	858677	751	858245	415	170.021	5.73253	167.998	●
PbANKA_08_v3	861320	866009	4690	862212	530	260.537	7.18084	257.689	●
PbANKA_08_v3	888492	889518	1027	889055	509	206.611	5.70064	204.389	●
PbANKA_08_v3	904333	905662	1330	904886	541	295.852	8.29329	291.897	●
PbANKA_08_v3	914304	915800	1497	915009	515	216.613	5.93595	214.322	●
PbANKA_08_v3	949511	952222	2712	950439	531	280.923	7.9176	277.563	●
PbANKA_08_v3	964265	966359	2095	965893	520	261.137	7.37992	258.279	●
PbANKA_08_v3	974863	975450	588	975121	348	127.263	5.05072	125.414	●
PbANKA_08_v3	975643	977224	1582	976096	308	100.992	4.51918	99.2461	●
PbANKA_08_v3	982436	983988	1553	982730	333	119.075	4.93036	117.259	●
PbANKA_08_v3	987086	988315	1230	987853	532	292.041	8.33431	288.258	●
PbANKA_08_v3	996781	997433	653	997072	281	86.7021	4.25955	85.0154	●
PbANKA_08_v3	1002386	1003109	724	1002755	246	61.8528	3.56924	60.2819	●
PbANKA_08_v3	1014646	1015498	853	1014990	346	126.164	5.03483	124.319	●
PbANKA_08_v3	1031679	1032431	753	1032078	412	175.535	5.99246	173.487	●
PbANKA_08_v3	1032529	1033838	1310	1033440	535	280.562	7.82474	277.212	●
PbANKA_08_v3	1042739	1043492	754	1043192	322	87.9791	3.84794	86.287	●
PbANKA_08_v3	1061523	1062676	1154	1061831	478	215.715	6.43762	213.431	●
PbANKA_08_v3	1081258	1085960	4703	1083898	542	262.906	7.06242	260.011
PbANKA_08_v3	1090998	1092560	1563	1091709	543	271.808	7.35622	268.712	●
PbANKA_08_v3	1099394	1101525	2132	1101133	543	267.164	7.1931	264.182	●
PbANKA_08_v3	1107125	1107797	673	1107485	440	203.117	6.60392	200.919	●
PbANKA_08_v3	1116577	1117341	765	1116832	418	168.738	5.63995	166.72	●
PbANKA_08_v3	1123305	1125241	1937	1124206	538	207.887	5.40734	205.657	●
PbANKA_08_v3	1143684	1144654	971	1144197	336	86.8239	3.68065	85.1367	●
PbANKA_08_v3	1158724	1160166	1443	1159763	465	186.466	5.61296	184.364	●
PbANKA_08_v3	1180184	1180804	621	1180500	359	124.825	4.80418	122.986	●
PbANKA_08_v3	1189957	1191400	1444	1191144	350	94.9535	3.83356	93.2325	●
PbANKA_08_v3	1210307	1211425	1119	1210710	364	127.772	4.85157	125.921	●
PbANKA_08_v3	1228831	1230317	1487	1230010	307	80.2141	3.70473	78.5565	●
PbANKA_08_v3	1235243	1236066	824	1235688	495	181.67	5.11286	179.592	●
PbANKA_08_v3	1249737	1250793	1057	1250302	534	233.435	6.21302	230.989	●
PbANKA_08_v3	1279286	1280085	800	1279724	410	158.193	5.36631	156.221	●
PbANKA_08_v3	1288500	1290790	2291	1289128	541	236.139	6.20369	233.664	●
PbANKA_08_v3	1301553	1302145	593	1301822	230	45.7811	3.00708	44.3061
PbANKA_09_v3	46089	46898	810	46551	381	131.054	4.76072	129.19	●
PbANKA_09_v3	62179	66347	4169	62771	539	313.11	9.04491	308.175	●
PbANKA_09_v3	78875	81021	2147	79321	441	206.422	6.71829	204.201
PbANKA_09_v3	81111	83466	2356	82762	546	272.079	7.31386	268.976	●
PbANKA_09_v3	91692	92828	1137	92370	499	252.762	7.45665	250.056	●
PbANKA_09_v3	99782	100718	937	100070	367	129.897	4.89304	128.038	●
PbANKA_09_v3	107125	108599	1475	107743	543	277.384	7.55619	274.131	●
PbANKA_09_v3	133209	134164	956	133793	245	57.0259	3.36468	55.481	●
PbANKA_09_v3	136353	137334	982	136918	252	71.3146	3.93419	69.6963	●
PbANKA_09_v3	156624	157177	554	156876	226	57.2501	3.57973	55.7041
PbANKA_09_v3	158624	160153	1530	159206	512	233.473	6.5298	231.028	●
PbANKA_09_v3	177766	178842	1077	178345	250	58.8223	3.39414	57.2678	●
PbANKA_09_v3	180603	181958	1356	181321	546	290.515	7.98532	286.806	●
PbANKA_09_v3	187018	189285	2268	187712	536	274.02	7.56165	270.865	●
PbANKA_09_v3	190192	192385	2194	191265	546	262.527	6.98487	259.641	●
PbANKA_09_v3	195194	196248	1055	195701	242	65.2419	3.77259	63.6534
PbANKA_09_v3	202870	203485	616	203212	266	77.6152	4.04637	75.9688
PbANKA_09_v3	213539	215110	1572	214815	325	90.3476	3.90505	88.6453	●
PbANKA_09_v3	216790	218065	1276	217676	546	297.101	8.23741	293.092	●
PbANKA_09_v3	238537	239149	613	238846	272	79.0383	4.03475	77.3859	●
PbANKA_09_v3	245720	246912	1193	246153	203	44.4171	3.19561	42.9513	●
PbANKA_09_v3	252868	254670	1803	254166	306	94.4257	4.27106	92.7069	●
PbANKA_09_v3	257006	258661	1656	257372	435	214.184	7.15965	211.91	●
PbANKA_09_v3	267192	267888	697	267575	214	44.7269	3.1007	43.259
PbANKA_09_v3	278702	279575	874	279114	521	285.557	8.3116	282.035	●
PbANKA_09_v3	302144	303021	878	302481	246	66.6777	3.79145	65.0817	●
PbANKA_09_v3	315743	316677	935	316162	486	235.777	7.04551	233.306	●
PbANKA_09_v3	328379	330428	2050	329737	541	292.621	8.16696	288.809	●
PbANKA_09_v3	332498	334124	1627	333579	412	165.749	5.61662	163.744	●
PbANKA_09_v3	334426	337881	3456	337224	535	278.356	7.74154	275.074	●
PbANKA_09_v3	374983	376642	1660	375932	544	287.414	7.90773	283.828	●
PbANKA_09_v3	379802	381611	1810	380356	443	178.93	5.65153	176.865	●
PbANKA_09_v3	420765	421245	481	421033	238	56.8232	3.42611	55.2794	●
PbANKA_09_v3	427876	428708	833	428348	316	90.7969	4.01357	89.0928	●
PbANKA_09_v3	465290	466315	1026	465666	463	183.805	5.55064	181.717	●
PbANKA_09_v3	472332	473638	1307	472914	536	289.23	8.1382	285.576	●
PbANKA_09_v3	540181	541175	995	540944	227	54.4688	3.43351	52.9386	●
PbANKA_09_v3	554338	556100	1763	555589	476	204.477	6.07157	202.269	●
PbANKA_09_v3	564216	565197	982	564704	487	215.156	6.2786	212.876	●
PbANKA_09_v3	572548	573158	611	572896	224	47.1358	3.12029	45.6518
PbANKA_09_v3	590201	591944	1744	591401	534	273.465	7.57823	270.325	●
PbANKA_09_v3	593471	594367	897	593947	529	240.275	6.50325	237.753	●
PbANKA_09_v3	626520	627103	584	626797	211	42.4757	3.0209	41.0234
PbANKA_09_v3	641288	642599	1312	641952	536	241.946	6.45629	239.403	●
PbANKA_09_v3	656799	658452	1654	657742	537	259.752	7.03575	256.919	●
PbANKA_09_v3	658896	659563	668	659210	274	81.5281	4.12022	79.8647	●
PbANKA_09_v3	664435	665014	580	664745	280	75.7138	3.79981	74.0756	●
PbANKA_09_v3	673990	675241	1252	674579	346	108.132	4.33559	106.358	●
PbANKA_09_v3	695668	696389	722	696015	257	70.5418	3.83684	68.9271	●
PbANKA_09_v3	735373	737196	1824	736508	545	269.093	7.22651	266.065
PbANKA_09_v3	741226	742567	1342	741532	382	157.291	5.7522	155.321	●
PbANKA_09_v3	748771	749410	640	749078	286	76.6382	3.77397	74.996	●
PbANKA_09_v3	766229	766866	638	766514	336	122.999	5.05088	121.167	●
PbANKA_09_v3	773604	774188	585	773930	381	119.85	4.37235	118.031	●
PbANKA_09_v3	830450	831956	1507	831435	517	233.503	6.45564	231.057	●
PbANKA_09_v3	840767	841751	985	841494	374	142.041	5.26421	140.134	●
PbANKA_09_v3	862357	863187	831	862708	514	237.522	6.63759	235.033	●
PbANKA_09_v3	864726	865383	658	864998	273	58.8732	3.19425	57.3183
PbANKA_09_v3	874417	875591	1175	875062	313	75.8438	3.49344	74.2052
PbANKA_09_v3	895907	896987	1081	896424	423	138.034	4.53593	136.143	●
PbANKA_09_v3	898733	899803	1071	899024	387	108.44	3.94839	106.664	●
PbANKA_09_v3	937341	938140	800	937793	473	239.498	7.4425	236.986	●
PbANKA_09_v3	958795	960444	1650	959340	542	225.765	5.87673	223.398	●
PbANKA_09_v3	992261	993724	1464	992804	520	207.221	5.58792	204.995	●
PbANKA_09_v3	996715	999062	2348	998006	521	234.751	6.43821	232.291	●
PbANKA_09_v3	1014752	1016160	1409	1015516	528	221.745	5.9288	219.414	●
PbANKA_09_v3	1041227	1041888	662	1041626	296	58.3297	3.00951	56.7778
PbANKA_09_v3	1064906	1065360	455	1065134	265	73.9054	3.89226	72.2752	●
PbANKA_09_v3	1073265	1075370	2106	1073966	542	256.305	6.83867	253.536	●
PbANKA_09_v3	1075952	1077956	2005	1077530	506	258.907	7.55975	256.09	●
PbANKA_09_v3	1087753	1088757	1005	1088197	266	53.8693	3.05606	52.3427
PbANKA_09_v3	1111019	1111775	757	1111309	398	164.654	5.78933	162.654	●
PbANKA_09_v3	1133247	1134222	976	1133579	411	168.453	5.73379	166.436	●
PbANKA_09_v3	1143408	1144164	757	1143863	409	128.597	4.37771	126.743	●
PbANKA_09_v3	1186501	1187820	1320	1187366	477	231.767	7.05603	229.34	●
PbANKA_09_v3	1204048	1204701	654	1204346	471	243.248	7.63984	240.685	●
PbANKA_09_v3	1227242	1228007	766	1227570	343	110.671	4.46472	108.887	●
PbANKA_09_v3	1229775	1230482	708	1230117	302	85.6171	3.96252	83.935	●
PbANKA_09_v3	1244207	1245301	1095	1244947	347	93.6637	3.8167	91.9479	●
PbANKA_09_v3	1272035	1272740	706	1272449	347	136.655	5.46115	134.769	●
PbANKA_09_v3	1279456	1280290	835	1279878	249	58.7296	3.39989	57.1756	●
PbANKA_09_v3	1286383	1287327	945	1286872	518	220.217	6.01018	217.898	●
PbANKA_09_v3	1298477	1299410	934	1298799	283	69.0648	3.50278	67.4572	●
PbANKA_09_v3	1308575	1310383	1809	1309226	508	253.83	7.32726	251.105	●
PbANKA_09_v3	1333425	1334981	1557	1333970	518	246.925	6.90079	244.309	●
PbANKA_09_v3	1358044	1358725	682	1358363	312	100.526	4.44693	98.7824	●
PbANKA_09_v3	1364127	1365356	1230	1364919	427	200.843	6.75312	198.659	●
PbANKA_09_v3	1370808	1371332	525	1371105	249	58.285	3.38062	56.7333
PbANKA_09_v3	1376981	1379060	2080	1377669	547	241.919	6.30262	239.376	●
PbANKA_09_v3	1388282	1388919	638	1388694	276	84.945	4.24741	83.266	●
PbANKA_09_v3	1391218	1392910	1693	1392485	512	237.617	6.67223	235.126	●
PbANKA_09_v3	1405501	1406477	977	1405773	230	49.8462	3.18826	48.3444
PbANKA_09_v3	1408398	1409531	1134	1409304	219	54.5618	3.52944	53.0311	●
PbANKA_09_v3	1425191	1425937	747	1425533	241	54.0489	3.27244	52.5212	●
PbANKA_09_v3	1426798	1430196	3399	1427388	530	250.531	6.83184	247.862	●
PbANKA_09_v3	1443508	1444212	705	1443958	186	44.0832	3.3758	42.6196	●
PbANKA_09_v3	1453204	1454560	1357	1453851	528	241.499	6.55846	238.961	●
PbANKA_09_v3	1472813	1473608	796	1473132	285	86.5397	4.20044	84.8536
PbANKA_09_v3	1488734	1490060	1327	1489054	256	52.0722	3.06167	50.5564
PbANKA_09_v3	1493799	1494379	581	1494093	330	108.181	4.52727	106.406	●
PbANKA_09_v3	1510065	1513855	3791	1511070	514	255.903	7.29493	253.142	●
PbANKA_09_v3	1540331	1541864	1534	1541597	346	144.008	5.80549	142.092	●
PbANKA_09_v3	1549294	1550291	998	1549680	456	211.043	6.63088	208.792	●
PbANKA_09_v3	1570983	1572190	1208	1571679	539	276.679	7.6039	273.45	●
PbANKA_09_v3	1583494	1584395	902	1583935	359	113.111	4.37232	111.318	●
PbANKA_10_v3	85234	86451	1218	85783	538	274.576	7.54527	271.408	●
PbANKA_10_v3	99741	100707	967	100178	222	47.1636	3.14013	45.6795
PbANKA_10_v3	139119	140234	1116	139747	535	306.342	8.85442	301.798	●
PbANKA_10_v3	176582	177899	1318	177070	508	232.236	6.54878	229.804	●
PbANKA_10_v3	215739	217266	1528	216726	264	60.1523	3.31994	58.5906	●
PbANKA_10_v3	225333	226549	1217	226027	535	273.135	7.54757	270.005	●
PbANKA_10_v3	245741	246325	585	245940	190	39.7884	3.09099	38.3556	●
PbANKA_10_v3	277869	279683	1815	278262	466	207.062	6.31499	204.838	●
PbANKA_10_v3	306079	306702	624	306394	362	127.994	4.88616	126.143	●
PbANKA_10_v3	330914	331333	420	331108	179	36.8012	3.04485	35.3916	●
PbANKA_10_v3	348426	349289	864	348656	242	52.0806	3.17786	50.5647
PbANKA_10_v3	359574	361564	1991	360771	328	64.5177	3.01368	62.933
PbANKA_10_v3	365323	366574	1252	366339	235	50.1373	3.15552	48.6336	●
PbANKA_10_v3	405436	406235	800	405840	342	120.429	4.85857	118.607	●
PbANKA_10_v3	414174	415750	1577	415170	521	231.763	6.33986	229.336	●
PbANKA_10_v3	431145	433415	2271	432092	542	226.668	5.90351	224.292	●
PbANKA_10_v3	489904	491580	1677	490469	510	202.24	5.55561	200.047	●
PbANKA_10_v3	512811	513799	989	513337	351	111.059	4.38685	109.273	●
PbANKA_10_v3	576357	577323	967	576731	481	238.428	7.24156	235.928	●
PbANKA_10_v3	591866	592504	639	592175	315	71.1342	3.31469	69.5168
PbANKA_10_v3	594368	595801	1434	595375	244	56.0549	3.33183	54.5155
PbANKA_10_v3	604239	605038	800	604631	497	223.241	6.40726	220.897	●
PbANKA_10_v3	614968	615444	477	615194	290	67.4338	3.37942	65.8341	●
PbANKA_10_v3	632303	632912	610	632547	305	86.2171	3.95384	84.5325	●
PbANKA_10_v3	658388	659369	982	658605	321	77.9289	3.50079	76.2811	●
PbANKA_10_v3	672582	673841	1260	673112	540	257.879	6.92315	255.082	●
PbANKA_10_v3	676018	677328	1311	676764	298	70.8524	3.43884	69.2363	●
PbANKA_10_v3	685314	686233	920	685862	317	97.7798	4.27383	96.0474	●
PbANKA_10_v3	701104	701853	750	701529	277	71.8228	3.67106	70.2023
PbANKA_10_v3	702931	704330	1400	703800	529	182.842	4.81786	180.758	●
PbANKA_10_v3	708762	709675	914	709432	278	61.5622	3.2569	59.9928	●
PbANKA_10_v3	716505	718175	1671	716914	285	57.4399	3.05211	55.8928
PbANKA_10_v3	728778	729237	460	729034	258	52.2261	3.05238	50.7093	●
PbANKA_10_v3	755712	756271	560	756000	412	159.001	5.36826	157.025	●
PbANKA_10_v3	759476	760038	563	759759	389	137.918	4.90878	136.027	●
PbANKA_10_v3	768145	768693	549	768402	309	93.8567	4.21183	92.1401	●
PbANKA_10_v3	771432	772494	1063	772106	527	181.469	4.79968	179.392	●
PbANKA_10_v3	785502	786471	970	785921	484	199.515	5.79372	197.339	●
PbANKA_10_v3	788384	789482	1099	788938	542	253.097	6.73203	250.385	●
PbANKA_10_v3	790950	791870	921	791338	440	186.034	5.94988	183.934	●
PbANKA_10_v3	808518	809766	1249	808840	323	81.6335	3.61265	79.9696	●
PbANKA_10_v3	824227	825575	1349	825157	383	152.387	5.538	150.437	●
PbANKA_10_v3	837828	838971	1144	838360	517	280.753	8.2029	277.398	●
PbANKA_10_v3	853923	854432	510	854163	263	71.6561	3.81616	70.0363	●
PbANKA_10_v3	867761	868967	1207	868361	302	82.3658	3.83537	80.6984	●
PbANKA_10_v3	875947	877061	1115	876558	537	265.801	7.24735	262.848	●
PbANKA_10_v3	883844	884291	448	884060	251	63.2791	3.57911	61.7008	●
PbANKA_10_v3	890017	891908	1892	891542	349	79.6019	3.34746	77.9469
PbANKA_10_v3	896758	899441	2684	898969	537	270.102	7.40096	267.05	●
PbANKA_10_v3	909424	910683	1260	909735	298	83.4958	3.9216	81.8233	●
PbANKA_10_v3	946304	947936	1633	947458	532	240.155	6.45571	237.635	●
PbANKA_10_v3	953230	954482	1253	954028	527	250.045	6.86306	247.383	●
PbANKA_10_v3	955449	956804	1356	955860	290	64.9296	3.28679	63.3427
PbANKA_10_v3	976151	980177	4027	979368	541	270.063	7.32918	267.012	●
PbANKA_10_v3	996248	997039	792	996718	260	59.7107	3.33771	58.1514
PbANKA_10_v3	1054619	1056075	1457	1055191	536	240.387	6.40611	237.863	●
PbANKA_10_v3	1064972	1066490	1519	1065533	526	247.433	6.78923	244.809	●
PbANKA_10_v3	1079980	1081666	1687	1080804	536	249.156	6.69243	246.508	●
PbANKA_10_v3	1094670	1095759	1090	1095448	375	115.382	4.28312	113.58	●
PbANKA_10_v3	1104384	1105367	984	1104670	273	73.748	3.79377	72.1185	●
PbANKA_10_v3	1116377	1118932	2556	1117629	543	286.51	7.89322	282.956	●
PbANKA_10_v3	1138005	1139174	1170	1138682	474	196.509	5.82839	194.351	●
PbANKA_10_v3	1143154	1144480	1327	1143774	506	251.278	7.26794	248.597	●
PbANKA_10_v3	1157755	1159465	1711	1158149	252	52.6384	3.11637	51.1192
PbANKA_10_v3	1162488	1163524	1037	1163224	284	65.9876	3.37548	64.3952	●
PbANKA_10_v3	1164685	1165780	1096	1165100	512	258.625	7.43402	255.813	●
PbANKA_10_v3	1168617	1171701	3085	1169543	325	107.333	4.55725	105.562
PbANKA_10_v3	1173508	1174062	555	1173807	285	89.3647	4.32448	87.6665	●
PbANKA_10_v3	1192218	1193538	1321	1192575	465	218.317	6.75293	216.013	●
PbANKA_10_v3	1226628	1227136	509	1226873	214	46.9166	3.20636	45.4341	●
PbANKA_10_v3	1275680	1276699	1020	1276204	217	53.6962	3.50965	52.1707
PbANKA_10_v3	1315633	1317459	1827	1316223	537	285.555	7.97554	282.033	●
PbANKA_10_v3	1322858	1324283	1426	1323586	401	168.51	5.89417	166.493	●
PbANKA_10_v3	1326681	1329399	2719	1327432	465	185.071	5.56675	182.977	●
PbANKA_10_v3	1355146	1355893	748	1355509	499	241.673	7.03483	239.134	●
PbANKA_10_v3	1393934	1395841	1908	1394704	517	263.687	7.53155	260.78	●
PbANKA_10_v3	1405480	1406435	956	1405704	261	59.4301	3.31721	57.8723	●
PbANKA_10_v3	1418565	1419994	1430	1419224	386	118.752	4.28561	116.937	●
PbANKA_10_v3	1434086	1435583	1498	1434668	534	306.848	8.89954	302.271	●
PbANKA_10_v3	1437961	1439415	1455	1438379	316	103.695	4.52592	101.938	●
PbANKA_10_v3	1481481	1482276	796	1481921	243	53.1452	3.21477	51.623
PbANKA_10_v3	1483705	1486586	2882	1484473	499	240.715	6.99932	238.188	●
PbANKA_10_v3	1527958	1529054	1097	1528731	473	239.4	7.43847	236.889	●
PbANKA_10_v3	1540477	1541352	876	1540824	293	100.39	4.70708	98.647	●
PbANKA_10_v3	1551821	1552818	998	1552425	439	216.193	7.16318	213.905	●
PbANKA_10_v3	1574815	1575809	995	1575379	319	83.6824	3.72055	82.009	●
PbANKA_10_v3	1584928	1585815	888	1585498	361	120.243	4.60778	118.422	●
PbANKA_10_v3	1599179	1600260	1082	1599710	523	218.252	5.88471	215.949	●
PbANKA_11_v3	65464	65978	515	65731	322	106.24	4.55186	104.473	●
PbANKA_11_v3	103284	103888	605	103631	311	91.1182	4.08021	89.4127	●
PbANKA_11_v3	110088	111095	1008	110718	417	153.315	5.10273	151.361	●
PbANKA_11_v3	116883	117421	539	117131	288	83.9676	4.05368	82.2929	●
PbANKA_11_v3	135367	136960	1594	136457	418	169.328	5.66184	167.308	●
PbANKA_11_v3	145281	145979	699	145481	238	57.7273	3.46745	56.1788
PbANKA_11_v3	157158	158512	1355	158044	355	130.967	5.09946	129.104	●
PbANKA_11_v3	169807	170328	522	170072	226	45.6523	3.03518	44.1783	●
PbANKA_11_v3	220711	222868	2158	222363	524	242.291	6.64545	239.743	●
PbANKA_11_v3	225716	227767	2052	226149	544	253.729	6.72265	251.006	●
PbANKA_11_v3	237469	239768	2300	238862	531	262.344	7.22805	259.462	●
PbANKA_11_v3	251637	253054	1418	252573	531	247.103	6.70014	244.483	●
PbANKA_11_v3	265581	266646	1066	266106	507	180.478	4.958	178.406	●
PbANKA_11_v3	269279	270007	729	269558	401	148.213	5.12578	146.28	●
PbANKA_11_v3	274246	275583	1338	274876	526	255.951	7.08616	253.189	●
PbANKA_11_v3	278227	279219	993	278553	272	65.7926	3.47492	64.2013	●
PbANKA_11_v3	285547	287485	1939	286544	343	104.101	4.22098	102.343	●
PbANKA_11_v3	291625	292786	1162	291939	399	173.954	6.1497	171.912	●
PbANKA_11_v3	306786	308471	1686	307557	542	247.88	6.5615	245.25	●
PbANKA_11_v3	327854	328462	609	328180	217	45.4421	3.1064	43.9695
PbANKA_11_v3	365822	367206	1385	366739	532	254.394	6.93236	251.659	●
PbANKA_11_v3	374906	375436	531	375174	228	48.5975	3.15022	47.1039
PbANKA_11_v3	386610	390468	3859	388481	401	131.682	4.55752	129.816	●
PbANKA_11_v3	401451	402926	1476	402294	524	187.273	4.98124	185.167	●
PbANKA_11_v3	407501	408625	1125	408094	515	234.307	6.51259	231.852	●
PbANKA_11_v3	414017	414811	795	414275	366	84.2761	3.37473	82.6
PbANKA_11_v3	418024	418712	689	418309	345	105.951	4.26675	104.185	●
PbANKA_11_v3	462470	464513	2044	463023	538	238.591	6.32102	236.09	●
PbANKA_11_v3	465582	466369	788	465994	374	132.436	4.89773	130.566	●
PbANKA_11_v3	471692	472530	839	472263	274	64.3959	3.40084	62.8118	●
PbANKA_11_v3	492531	493155	625	492838	341	106.085	4.31586	104.319	●
PbANKA_11_v3	499612	500787	1176	500294	541	257.358	6.88969	254.569	●
PbANKA_11_v3	520323	522149	1827	521525	546	284.158	7.74821	280.691	●
PbANKA_11_v3	525161	525663	503	525400	288	91.6986	4.38736	89.9907	●
PbANKA_11_v3	529445	530208	764	529858	213	46.3248	3.18762	44.8462	●
PbANKA_11_v3	533707	534472	766	533978	216	47.71	3.22459	46.2222
PbANKA_11_v3	543991	545243	1253	544643	526	255.608	7.07399	252.852	●
PbANKA_11_v3	545987	547520	1534	546661	276	60.5009	3.23257	58.9373
PbANKA_11_v3	552425	552917	493	552683	313	100.866	4.44807	99.1206	●
PbANKA_11_v3	561132	562523	1392	561962	542	255.857	6.82368	253.096	●
PbANKA_11_v3	572502	573396	895	573023	221	50.8038	3.32218	49.2959	●
PbANKA_11_v3	580345	583189	2845	582232	468	203.816	6.16721	201.613	●
PbANKA_11_v3	589628	591100	1473	590088	461	205.984	6.35547	203.767	●
PbANKA_11_v3	595050	596614	1565	595496	473	195.738	5.81612	193.585	●
PbANKA_11_v3	597254	598972	1719	597674	435	185.252	5.99781	183.157
PbANKA_11_v3	614325	615403	1079	614824	540	262.913	7.09561	260.019	●
PbANKA_11_v3	626726	628302	1577	627228	526	245.05	6.708	242.461	●
PbANKA_11_v3	629212	630498	1287	629816	306	83.8643	3.8524	82.1901
PbANKA_11_v3	634209	636724	2516	635506	461	174.507	5.27294	172.463	●
PbANKA_11_v3	641052	648135	7084	646303	535	260.284	7.08732	257.442	●
PbANKA_11_v3	663365	665012	1648	664603	470	175.236	5.19172	173.189	●
PbANKA_11_v3	683938	685930	1993	685649	338	106.545	4.36727	104.777	●
PbANKA_11_v3	737788	738801	1014	738317	509	239.352	6.78112	236.842	●
PbANKA_11_v3	739777	740436	660	740107	441	195.527	6.28996	193.375	●
PbANKA_11_v3	752166	754027	1862	753188	548	297.971	8.2297	293.926	●
PbANKA_11_v3	757889	760181	2293	759318	538	273.629	7.51071	270.485	●
PbANKA_11_v3	773369	774680	1312	774069	528	260.475	7.21318	257.629	●
PbANKA_11_v3	784026	784846	821	784480	211	53.7986	3.58895	52.2724	●
PbANKA_11_v3	829575	830603	1029	830070	244	56.4923	3.351	54.9504
PbANKA_11_v3	832643	833432	790	833104	353	106.246	4.1927	104.479	●
PbANKA_11_v3	858979	860209	1231	859658	543	248.703	6.57359	246.062	●
PbANKA_11_v3	864257	865182	926	864734	323	102.939	4.40626	101.185	●
PbANKA_11_v3	867638	869180	1543	868664	503	224.128	6.3475	221.776	●
PbANKA_11_v3	891714	892573	860	892326	200	40.1206	3.00788	38.6854
PbANKA_11_v3	895554	896871	1318	896205	489	231.16	6.81932	228.739	●
PbANKA_11_v3	905490	906896	1407	905990	527	228.813	6.16173	226.416	●
PbANKA_11_v3	927896	928775	880	928305	423	191.093	6.42569	188.966	●
PbANKA_11_v3	938654	939708	1055	939010	206	45.4992	3.21888	44.0262
PbANKA_11_v3	959226	959757	532	959514	221	49.1019	3.24084	47.605
PbANKA_11_v3	961009	961556	548	961350	213	43.8554	3.06844	42.3934
PbANKA_11_v3	969877	971679	1803	971157	538	278.249	7.6805	274.97	●
PbANKA_11_v3	1006119	1007263	1145	1006480	327	134.399	5.71383	132.522	●
PbANKA_11_v3	1035485	1035976	492	1035739	239	53.8507	3.28261	52.3242	●
PbANKA_11_v3	1036312	1036742	431	1036511	212	55.2659	3.65348	53.731
PbANKA_11_v3	1088268	1089344	1077	1088773	446	168.799	5.26801	166.78	●
PbANKA_11_v3	1093036	1094691	1656	1093893	545	293.521	8.11982	289.671	●
PbANKA_11_v3	1097351	1098794	1444	1098254	536	284.015	7.93649	280.552	●
PbANKA_11_v3	1112872	1114026	1155	1113326	278	74.5429	3.77277	72.9099	●
PbANKA_11_v3	1139520	1140365	846	1139991	480	199.354	5.8419	197.178	●
PbANKA_11_v3	1143755	1144372	618	1144099	237	55.8573	3.39245	54.3189
PbANKA_11_v3	1150474	1151320	847	1150817	197	39.4824	3.0043	38.0518
PbANKA_11_v3	1154427	1155368	942	1154753	408	165.296	5.65902	163.293	●
PbANKA_11_v3	1156240	1157571	1332	1156938	533	250.899	6.7971	248.225	●
PbANKA_11_v3	1161179	1162169	991	1161498	403	158.987	5.49422	157.011	●
PbANKA_11_v3	1178419	1179874	1456	1179016	543	290.843	8.05762	287.115	●
PbANKA_11_v3	1191515	1194254	2740	1192142	537	273.692	7.53127	270.546	●
PbANKA_11_v3	1202665	1206388	3724	1204248	335	88.7636	3.75572	87.0681	●
PbANKA_11_v3	1209705	1210395	691	1210049	222	52.2143	3.37955	50.6976	●
PbANKA_11_v3	1229108	1230296	1189	1229535	260	70.2156	3.787	68.6025	●
PbANKA_11_v3	1230525	1231415	891	1231003	444	227.715	7.55692	225.329	●
PbANKA_11_v3	1270341	1270779	439	1270578	244	58.7259	3.44992	57.1719	●
PbANKA_11_v3	1298246	1299429	1184	1299030	346	133.951	5.36095	132.076	●
PbANKA_11_v3	1305553	1306908	1356	1306328	523	266.16	7.51164	263.199	●
PbANKA_11_v3	1312976	1314903	1928	1314251	526	239.975	6.53768	237.457	●
PbANKA_11_v3	1332570	1333784	1215	1333228	504	240.551	6.90716	238.025	●
PbANKA_11_v3	1343089	1345455	2367	1344810	541	271.238	7.37096	268.157	●
PbANKA_11_v3	1359214	1359898	685	1359592	320	99.1392	4.29204	97.4011	●
PbANKA_11_v3	1377603	1378116	514	1377852	300	123.683	5.71715	121.848	●
PbANKA_11_v3	1416847	1418148	1302	1417588	545	283.263	7.73405	279.829	●
PbANKA_11_v3	1420657	1421279	623	1420946	215	49.358	3.3156	47.8593	●
PbANKA_11_v3	1425460	1426313	854	1425977	225	49.0957	3.20127	47.5988
PbANKA_11_v3	1446297	1447292	996	1446929	459	196.685	6.04887	194.526	●
PbANKA_11_v3	1458841	1459982	1142	1459394	545	328.228	9.54868	321.154	●
PbANKA_11_v3	1468483	1469184	702	1468745	246	68.2586	3.86609	66.6548	●
PbANKA_11_v3	1485302	1485948	647	1485670	317	91.4078	4.02623	89.701	●
PbANKA_11_v3	1544665	1545150	486	1544890	271	97.0077	4.90314	95.2784	●
PbANKA_11_v3	1558820	1559990	1171	1559402	544	302.059	8.47483	297.814	●
PbANKA_11_v3	1561118	1562743	1626	1561715	506	272.284	8.09497	269.176	●
PbANKA_11_v3	1572446	1573124	679	1572749	289	89.6935	4.286	87.9939	●
PbANKA_11_v3	1582989	1583455	467	1583212	190	45.3229	3.39521	43.851
PbANKA_11_v3	1586776	1589597	2822	1587236	476	250.194	7.82557	247.53	●
PbANKA_11_v3	1593695	1596714	3020	1595443	482	230.69	6.92389	228.274	●
PbANKA_11_v3	1610332	1611741	1410	1610890	543	280.237	7.66022	276.895	●
PbANKA_11_v3	1614825	1615742	918	1615132	379	157.438	5.80836	155.468	●
PbANKA_11_v3	1627721	1628846	1126	1628379	479	220.711	6.60309	218.388	●
PbANKA_11_v3	1637861	1638876	1016	1638396	487	236.052	7.03787	233.578	●
PbANKA_11_v3	1682881	1683277	397	1683070	190	44.3508	3.34063	42.8855
PbANKA_11_v3	1685152	1685996	845	1685535	491	225.442	6.57846	223.078	●
PbANKA_11_v3	1709240	1710522	1283	1709721	314	73.2187	3.39375	71.5917	●
PbANKA_12_v3	61164	61594	431	61378	212	53.2165	3.54588	51.6938	●
PbANKA_12_v3	76299	77034	736	76721	452	202.664	6.37883	200.469	●
PbANKA_12_v3	91650	92512	863	92095	240	54.8046	3.3153	53.2725	●
PbANKA_12_v3	101149	101995	847	101393	259	80.8269	4.29219	79.1666	●
PbANKA_12_v3	103779	106988	3210	106152	543	277.717	7.56827	274.454	●
PbANKA_12_v3	108749	109245	497	109029	217	54.6293	3.55701	53.0981	●
PbANKA_12_v3	113332	114643	1312	113719	404	154.826	5.32563	152.867	●
PbANKA_12_v3	124667	125352	686	124983	225	51.2623	3.30251	49.7515	●
PbANKA_12_v3	138352	141126	2775	139505	529	252.95	6.93113	250.24	●
PbANKA_12_v3	164310	165097	788	164728	299	87.1381	4.05674	85.4495	●
PbANKA_12_v3	172791	175097	2307	173344	461	227.653	7.19825	225.268	●
PbANKA_12_v3	178152	178821	670	178472	239	60.6461	3.59154	59.0817
PbANKA_12_v3	187999	188918	920	188337	259	82.7536	4.38619	81.0845	●
PbANKA_12_v3	189817	191178	1362	190345	502	247.812	7.2106	245.182	●
PbANKA_12_v3	193252	196140	2889	194347	517	226.594	6.22785	224.218	●
PbANKA_12_v3	225632	227795	2164	227273	538	248.72	6.64789	246.079	●
PbANKA_12_v3	233016	234139	1124	233398	307	85.9278	3.92147	84.2443	●
PbANKA_12_v3	242235	243212	978	242624	300	74.2625	3.54736	72.6307	●
PbANKA_12_v3	244894	245625	732	245294	437	198.566	6.47655	196.396	●
PbANKA_12_v3	251290	251947	658	251553	270	83.6474	4.26976	81.9741	●
PbANKA_12_v3	285037	287088	2052	286100	475	196.726	5.82203	194.566	●
PbANKA_12_v3	295126	296519	1394	295652	542	257.388	6.87497	254.598	●
PbANKA_12_v3	307089	307846	758	307501	489	243.689	7.29502	241.121	●
PbANKA_12_v3	312960	314341	1382	313658	485	245.892	7.4601	243.29	●
PbANKA_12_v3	328907	329932	1026	329369	525	231.066	6.26092	228.646	●
PbANKA_12_v3	358718	360509	1792	359379	309	104.121	4.63908	102.363	●
PbANKA_12_v3	364934	366353	1420	366003	247	69.068	3.89186	67.4604
PbANKA_12_v3	371527	372536	1010	371940	315	91.3084	4.04384	89.6021	●
PbANKA_12_v3	378245	379063	819	378577	281	66.2351	3.41084	64.6414	●
PbANKA_12_v3	395361	396158	798	395813	293	77.1324	3.72236	75.488	●
PbANKA_12_v3	403688	405511	1824	404591	535	233.937	6.21531	231.486	●
PbANKA_12_v3	416041	416805	765	416570	303	107.667	4.88515	105.895	●
PbANKA_12_v3	435666	436655	990	435933	430	192.782	6.36988	190.645	●
PbANKA_12_v3	442454	443799	1346	443365	362	107.191	4.13503	105.42	●
PbANKA_12_v3	448585	450694	2110	449832	548	263.566	6.98803	260.659	●
PbANKA_12_v3	477838	479232	1395	478458	273	68.294	3.56684	66.69	●
PbANKA_12_v3	504761	505953	1193	505289	435	185.275	5.99864	183.179	●
PbANKA_12_v3	526756	527906	1151	527115	221	50.803	3.32214	49.2951
PbANKA_12_v3	531485	532249	765	531904	269	90.1098	4.59226	88.4084	●
PbANKA_12_v3	536776	537698	923	537058	374	124.274	4.60136	122.437	●
PbANKA_12_v3	539229	540874	1646	540446	407	161.38	5.52606	159.394	●
PbANKA_12_v3	542069	543666	1598	542625	272	68.6146	3.58987	67.0092	●
PbANKA_12_v3	553715	554763	1049	554214	542	289.469	8.02517	285.806	●
PbANKA_12_v3	558006	561843	3838	560392	538	262.435	7.11224	259.551	●
PbANKA_12_v3	585500	587046	1547	586288	432	163.787	5.27386	161.791	●
PbANKA_12_v3	587779	589090	1312	588134	342	102.878	4.18717	101.124	●
PbANKA_12_v3	603092	603799	708	603320	208	43.2215	3.08517	41.7639	●
PbANKA_12_v3	612692	613260	569	612936	189	39.2902	3.07481	37.8611
PbANKA_12_v3	673058	673624	567	673352	314	106.38	4.66572	104.613	●
PbANKA_12_v3	678706	682666	3961	679942	542	261.249	7.00573	258.389	●
PbANKA_12_v3	684303	685475	1173	684828	337	93.6105	3.90621	91.8949	●
PbANKA_12_v3	703092	703548	457	703337	220	61.7217	3.88642	60.1516
PbANKA_12_v3	707562	709158	1597	708181	541	283.436	7.81665	279.995	●
PbANKA_12_v3	710560	712073	1514	711663	282	73.3118	3.68078	71.6844
PbANKA_12_v3	712713	716017	3305	715525	533	250.899	6.7971	248.225	●
PbANKA_12_v3	735685	736521	837	736187	293	93.1022	4.38151	91.3887	●
PbANKA_12_v3	738862	740124	1263	739220	278	64.9833	3.38855	63.3961	●
PbANKA_12_v3	743293	744702	1410	744316	480	224.69	6.73335	222.333	●
PbANKA_12_v3	749854	750405	552	750101	251	50.3483	3.03114	48.8432
PbANKA_12_v3	769229	770065	837	769532	267	63.5225	3.42958	61.9431	●
PbANKA_12_v3	782842	783673	832	783265	450	170.131	5.26314	168.106	●
PbANKA_12_v3	790600	792836	2237	791223	520	257.629	7.25074	254.836	●
PbANKA_12_v3	831006	832732	1727	832359	439	177.59	5.66005	175.532	●
PbANKA_12_v3	846700	847350	651	847098	244	55.6242	3.313	54.0872	●
PbANKA_12_v3	849986	850874	889	850591	289	77.1601	3.76386	75.5157	●
PbANKA_12_v3	851955	854404	2450	853606	413	182.722	6.26317	180.639	●
PbANKA_12_v3	859959	860587	629	860267	365	145.911	5.55922	143.988	●
PbANKA_12_v3	871420	872184	765	871818	405	139.114	4.76129	137.218	●
PbANKA_12_v3	876601	877515	915	876977	399	137.797	4.78503	135.907	●
PbANKA_12_v3	878834	881738	2905	880785	544	257.989	6.86386	255.189	●
PbANKA_12_v3	930327	930746	420	930537	232	54.1814	3.36693	52.6529	●
PbANKA_12_v3	931566	932667	1102	932184	296	75.1595	3.6174	73.5237	●
PbANKA_12_v3	939010	940709	1700	940218	532	250.114	6.78619	247.452	●
PbANKA_12_v3	942553	943555	1003	943123	276	71.5908	3.67178	69.9713	●
PbANKA_12_v3	949268	950226	959	949702	492	201.784	5.76275	199.594	●
PbANKA_12_v3	960225	961306	1082	960872	407	164.404	5.64015	162.405	●
PbANKA_12_v3	973275	974824	1550	974382	508	213.851	5.94	211.58	●
PbANKA_12_v3	981970	982710	741	982340	422	147.994	4.86497	146.063	●
PbANKA_12_v3	1030773	1031592	820	1031091	406	150.784	5.15306	148.841	●
PbANKA_12_v3	1039520	1040548	1029	1040030	424	147.245	4.81828	145.317	●
PbANKA_12_v3	1046374	1047151	778	1046814	501	242.157	7.0176	239.611	●
PbANKA_12_v3	1048692	1050225	1534	1049336	528	233.477	6.29663	231.031	●
PbANKA_12_v3	1051719	1052543	825	1052182	278	81.0269	4.04818	79.3657
PbANKA_12_v3	1074205	1076094	1890	1074739	513	251.581	7.15332	248.895	●
PbANKA_12_v3	1086197	1087603	1407	1086827	532	272.911	7.59501	269.786	●
PbANKA_12_v3	1102109	1104100	1992	1102746	533	283.337	7.97053	279.9	●
PbANKA_12_v3	1137589	1138481	893	1137978	318	75.9062	3.45511	74.2673	●
PbANKA_12_v3	1153611	1154969	1359	1154403	530	249.456	6.79518	246.803	●
PbANKA_12_v3	1205886	1207493	1608	1206891	535	245.204	6.57687	242.614	●
PbANKA_12_v3	1219896	1221304	1409	1220650	517	271.835	7.84607	268.739	●
PbANKA_12_v3	1228427	1231166	2740	1230116	539	245.415	6.52525	242.821	●
PbANKA_12_v3	1243537	1245353	1817	1244150	532	207.838	5.47062	205.608	●
PbANKA_12_v3	1250448	1251578	1131	1251128	534	290.051	8.21225	286.36	●
PbANKA_12_v3	1253288	1254296	1009	1253776	528	274.279	7.72255	271.118	●
PbANKA_12_v3	1255219	1257420	2202	1256744	400	131.22	4.55285	129.355	●
PbANKA_12_v3	1282280	1283012	733	1282627	276	64.3535	3.38147	62.7696
PbANKA_12_v3	1293193	1295500	2308	1293992	484	225.908	6.71058	223.538	●
PbANKA_12_v3	1295593	1297227	1635	1296574	546	318.103	9.08697	312.923	●
PbANKA_12_v3	1298412	1299227	816	1298931	198	43.4413	3.19875	41.9821
PbANKA_12_v3	1304348	1306737	2390	1306375	485	224.847	6.655	222.489	●
PbANKA_12_v3	1337706	1339930	2225	1339303	540	227.843	5.96331	225.455	●
PbANKA_12_v3	1361364	1362244	881	1361659	325	122.349	5.19457	120.52	●
PbANKA_12_v3	1380601	1381097	497	1380844	262	75.0759	3.98154	73.4405	●
PbANKA_12_v3	1383358	1383786	429	1383575	199	40.3869	3.03095	38.9498	●
PbANKA_12_v3	1385016	1385623	608	1385304	272	66.719	3.51241	65.1229	●
PbANKA_12_v3	1394012	1396549	2538	1395965	535	269.536	7.41622	266.497	●
PbANKA_12_v3	1433399	1434289	891	1433874	499	239.544	6.95613	237.031	●
PbANKA_12_v3	1442930	1444796	1867	1444295	447	201.601	6.42216	199.412	●
PbANKA_12_v3	1451420	1452007	588	1451713	277	64.8901	3.39368	63.3034
PbANKA_12_v3	1459930	1460898	969	1460197	256	58.9477	3.34262	57.3925	●
PbANKA_12_v3	1465221	1466130	910	1465651	241	51.5719	3.16478	50.0592
PbANKA_12_v3	1474804	1475274	471	1475043	191	39.5288	3.06668	38.0979
PbANKA_12_v3	1488128	1489139	1012	1488872	403	142.505	4.90007	140.596	●
PbANKA_12_v3	1493170	1495151	1982	1493898	510	234.916	6.61017	232.455	●
PbANKA_12_v3	1498153	1501494	3342	1498923	547	283.807	7.71655	280.35	●
PbANKA_12_v3	1511383	1512750	1368	1512136	503	223.142	6.31416	220.799	●
PbANKA_12_v3	1521670	1524642	2973	1522882	361	117.566	4.51006	115.756	●
PbANKA_12_v3	1527668	1529519	1852	1528271	261	59.1749	3.30678	57.6185	●
PbANKA_12_v3	1541892	1542756	865	1542433	223	46.4802	3.09932	45.0006
PbANKA_12_v3	1562148	1563864	1717	1562780	543	257.289	6.85604	254.502
PbANKA_12_v3	1565752	1566920	1169	1566636	256	53.56	3.12135	52.0352
PbANKA_12_v3	1592333	1592791	459	1592547	226	53.0317	3.37582	51.5101	●
PbANKA_12_v3	1607664	1608303	640	1608001	290	68.3227	3.41265	66.7186	●
PbANKA_12_v3	1612011	1612773	763	1612343	242	52.0806	3.17786	50.5647
PbANKA_12_v3	1620333	1621217	885	1620766	507	209.472	5.81453	207.232	●
PbANKA_12_v3	1623898	1625835	1938	1624538	248	62.8196	3.59104	61.2437	●
PbANKA_12_v3	1636150	1637121	972	1636668	541	228.624	5.97434	226.229	●
PbANKA_12_v3	1638001	1639384	1384	1638785	545	274.74	7.42536	271.568	●
PbANKA_12_v3	1656285	1657165	881	1656697	478	183.424	5.35413	181.338	●
PbANKA_12_v3	1668504	1669490	987	1669002	251	57.1662	3.31373	55.6206
PbANKA_12_v3	1673090	1673742	653	1673363	318	111.402	4.82345	109.616	●
PbANKA_12_v3	1700696	1701947	1252	1701395	536	262.274	7.14012	259.393	●
PbANKA_12_v3	1724847	1726381	1535	1725395	532	276.613	7.73361	273.386	●
PbANKA_12_v3	1729066	1729578	513	1729354	202	48.4936	3.41996	47.0007
PbANKA_13_v3	47174	47971	798	47535	365	156.242	6.00453	154.277	●
PbANKA_13_v3	57511	59319	1809	58156	547	292.726	8.04919	288.909	●
PbANKA_13_v3	89651	92383	2733	91354	533	278.278	7.77717	274.998	●
PbANKA_13_v3	165967	168597	2631	167012	544	278.269	7.57008	274.99
PbANKA_13_v3	169775	170304	530	170082	231	65.208	3.91383	63.6197	●
PbANKA_13_v3	193187	193767	581	193506	326	130.615	5.55414	128.753	●
PbANKA_13_v3	194597	196576	1980	195655	488	239.975	7.16977	237.457	●
PbANKA_13_v3	203790	204589	800	204239	426	180.049	5.94255	177.979	●
PbANKA_13_v3	209949	210597	649	210219	202	43.0489	3.13623	41.5926
PbANKA_13_v3	220637	221481	845	221147	326	114.205	4.82703	112.408	●
PbANKA_13_v3	247297	248962	1666	248279	530	312.802	9.25569	307.879	●
PbANKA_13_v3	280551	281413	863	280942	462	219.245	6.84282	216.935	●
PbANKA_13_v3	289098	289759	662	289400	266	63.8861	3.45385	62.3048	●
PbANKA_13_v3	437562	439697	2136	438731	416	132.514	4.43261	130.644	●
PbANKA_13_v3	456841	457969	1129	457190	333	86.1011	3.6816	84.4169	●
PbANKA_13_v3	459806	460446	641	460146	309	104.249	4.64461	102.49	●
PbANKA_13_v3	462953	464617	1665	463563	248	56.6783	3.32085	55.1352
PbANKA_13_v3	482616	485130	2515	484569	225	50.1001	3.24799	48.5967
PbANKA_13_v3	488776	489288	513	489069	204	43.2988	3.12851	41.8407
PbANKA_13_v3	490414	491748	1335	491477	251	50.3483	3.03114	48.8432
PbANKA_13_v3	498015	499908	1894	498849	537	291.495	8.20612	287.736	●
PbANKA_13_v3	501856	502817	962	502190	295	101.717	4.73736	99.9681	●
PbANKA_13_v3	530045	530566	522	530305	223	46.313	3.09164	44.8346
PbANKA_13_v3	534657	536653	1997	535289	540	276.393	7.57496	273.172	●
PbANKA_13_v3	541344	542653	1310	541683	448	203.674	6.48498	201.472	●
PbANKA_13_v3	548229	550840	2612	548956	539	288.982	8.06701	285.342	●
PbANKA_13_v3	554762	555799	1038	555427	246	59.8206	3.47808	58.2606	●
PbANKA_13_v3	560735	561707	973	561213	510	251.28	7.19554	248.599	●
PbANKA_13_v3	575942	577239	1298	576330	392	157.746	5.611	155.775	●
PbANKA_13_v3	584380	585842	1463	585084	471	209.129	6.31104	206.891	●
PbANKA_13_v3	587039	588823	1785	588042	538	268.62	7.33017	265.602	●
PbANKA_13_v3	591415	592567	1153	591662	268	68.294	3.61704	66.69
PbANKA_13_v3	623734	625188	1455	624874	379	143.725	5.25777	141.811	●
PbANKA_13_v3	648756	650202	1447	649473	531	297.933	8.59663	293.893	●
PbANKA_13_v3	652339	654290	1952	652953	529	280.236	7.93123	276.895	●
PbANKA_13_v3	722649	723199	551	722948	243	86.3977	4.8504	84.7123	●
PbANKA_13_v3	726335	727955	1621	727053	542	301.575	8.49914	297.366	●
PbANKA_13_v3	757768	758560	793	758288	356	122.307	4.74668	120.478	●
PbANKA_13_v3	766710	767909	1200	767498	408	190.059	6.66414	187.937	●
PbANKA_13_v3	769425	771457	2033	770434	546	299.803	8.34276	295.675	●
PbANKA_13_v3	773742	775438	1697	774902	476	247.406	7.70788	244.782	●
PbANKA_13_v3	775812	777059	1248	776599	515	244.393	6.8609	241.814	●
PbANKA_13_v3	779853	781348	1496	780692	518	286.134	8.40215	282.593	●
PbANKA_13_v3	784405	784967	563	784646	231	60.0185	3.6553	58.4574
PbANKA_13_v3	804019	806583	2565	805975	536	269.227	7.38721	266.196	●
PbANKA_13_v3	830040	831687	1648	830993	532	257.718	7.04765	254.922	●
PbANKA_13_v3	852678	853490	813	853167	246	57.1205	3.35909	55.5751	●
PbANKA_13_v3	855957	857757	1801	856580	523	244.632	6.74061	242.05	●
PbANKA_13_v3	864975	866204	1230	865389	494	215.92	6.2014	213.635	●
PbANKA_13_v3	935596	936468	873	936164	356	125.846	4.88289	124.002	●
PbANKA_13_v3	976521	977308	788	976814	369	142.631	5.36177	140.721	●
PbANKA_13_v3	987759	988962	1204	988412	498	260.996	7.80406	258.14	●
PbANKA_13_v3	993585	994947	1363	994637	344	116.039	4.65828	114.234	●
PbANKA_13_v3	998483	999564	1082	998968	522	258.029	7.22989	255.228	●
PbANKA_13_v3	1003334	1004765	1432	1004126	545	301.611	8.43539	297.397	●
PbANKA_13_v3	1036946	1038050	1105	1037510	360	121.592	4.66981	119.766	●
PbANKA_13_v3	1046520	1047801	1282	1046963	535	245.204	6.57687	242.614	●
PbANKA_13_v3	1108955	1110121	1167	1109670	330	112.197	4.68859	110.407	●
PbANKA_13_v3	1124597	1125985	1389	1125268	532	259.97	7.12667	257.133	●
PbANKA_13_v3	1134149	1136409	2261	1134742	487	224.209	6.59896	221.857	●
PbANKA_13_v3	1148562	1150519	1958	1149586	542	238.875	6.27537	236.37	●
PbANKA_13_v3	1160953	1162422	1470	1161531	535	267.176	7.33117	264.193	●
PbANKA_13_v3	1189035	1190824	1790	1189505	475	241.159	7.46986	238.626	●
PbANKA_13_v3	1205098	1206068	971	1205554	310	85.0118	3.85573	83.3324	●
PbANKA_13_v3	1215959	1216850	892	1216486	207	42.9372	3.08086	41.4817
PbANKA_13_v3	1218299	1222027	3729	1220562	535	270.331	7.44507	267.273	●
PbANKA_13_v3	1244084	1245432	1349	1244969	527	267.281	7.47908	264.295	●
PbANKA_13_v3	1249975	1253258	3284	1251906	292	69.8582	3.45308	68.2467	●
PbANKA_13_v3	1258553	1260262	1710	1259758	438	195.264	6.33005	193.113	●
PbANKA_13_v3	1283744	1285522	1779	1285076	305	100.116	4.52247	98.3744	●
PbANKA_13_v3	1291648	1292369	722	1292035	305	93.8238	4.25859	92.1073	●
PbANKA_13_v3	1299342	1300590	1249	1300197	516	246.327	6.91273	243.719	●
PbANKA_13_v3	1307906	1308932	1027	1308439	430	199.291	6.63215	197.116	●
PbANKA_13_v3	1324720	1325611	892	1325165	367	148.829	5.6488	146.895	●
PbANKA_13_v3	1339498	1340020	523	1339748	193	41.2086	3.13486	39.7654	●
PbANKA_13_v3	1353239	1354934	1696	1353957	459	202.407	6.2558	200.213	●
PbANKA_13_v3	1383984	1384702	719	1384320	333	118.489	4.90589	116.675	●
PbANKA_13_v3	1389492	1390946	1455	1390219	521	277.567	7.99007	274.309	●
PbANKA_13_v3	1396867	1398102	1236	1397535	536	286.604	8.03608	283.045	●
PbANKA_13_v3	1430286	1431463	1178	1430861	515	260.279	7.44033	257.437	●
PbANKA_13_v3	1445773	1446875	1103	1446537	254	59.1961	3.37176	57.6395
PbANKA_13_v3	1456710	1457302	593	1456969	333	111.59	4.62452	109.802	●
PbANKA_13_v3	1459562	1461204	1643	1460489	528	232.501	6.26536	230.066	●
PbANKA_13_v3	1474507	1476735	2229	1476400	349	101.442	4.06459	99.6942	●
PbANKA_13_v3	1501127	1503750	2624	1503083	548	287.97	7.85114	284.368
PbANKA_13_v3	1515478	1517490	2013	1516881	274	62.6146	3.33081	61.0398
PbANKA_13_v3	1519132	1519731	600	1519403	394	157.669	5.57735	155.698	●
PbANKA_13_v3	1522302	1524375	2074	1523545	537	254.259	6.84802	251.526	●
PbANKA_13_v3	1562813	1563337	525	1563073	279	78.2687	3.91798	76.6195	●
PbANKA_13_v3	1566336	1567761	1426	1566848	278	68.873	3.54188	67.2662	●
PbANKA_13_v3	1619352	1619988	637	1619671	398	137.112	4.77307	135.224	●
PbANKA_13_v3	1652026	1652728	703	1652426	368	98.235	3.78735	96.5007	●
PbANKA_13_v3	1666633	1667755	1123	1667307	542	223.975	5.82387	221.624	●
PbANKA_13_v3	1684318	1685247	930	1684780	527	232.672	6.28473	230.236	●
PbANKA_13_v3	1704071	1704755	685	1704460	306	72.9337	3.44772	71.308
PbANKA_13_v3	1724770	1726753	1984	1725753	507	179.75	4.9378	177.681	●
PbANKA_13_v3	1729130	1729656	527	1729401	255	50.4447	3.00453	48.9391	●
PbANKA_13_v3	1745454	1746339	886	1745805	254	59.639	3.39056	58.08
PbANKA_13_v3	1767759	1770016	2258	1768797	470	165.533	4.89749	163.529	●
PbANKA_13_v3	1771470	1772506	1037	1772012	286	70.9166	3.54722	69.3001	●
PbANKA_13_v3	1785924	1786805	882	1786242	425	149.324	4.87484	147.387	●
PbANKA_13_v3	1788770	1791306	2537	1790906	510	254.29	7.30771	251.556	●
PbANKA_13_v3	1795024	1795713	690	1795385	348	124.983	4.9584	123.143	●
PbANKA_13_v3	1796804	1798882	2079	1798208	486	187.694	5.39301	185.586	●
PbANKA_13_v3	1810440	1811725	1286	1810993	496	210.9	6.00565	208.649	●
PbANKA_13_v3	1812468	1813447	980	1812958	520	230.955	6.32772	228.537	●
PbANKA_13_v3	1816982	1818747	1766	1818131	544	275.054	7.45427	271.872	●
PbANKA_13_v3	1822653	1824072	1420	1823081	443	155.53	4.87572	153.568	●
PbANKA_13_v3	1824741	1826070	1330	1825291	537	247.345	6.61755	244.722	●
PbANKA_13_v3	1827371	1828368	998	1827788	278	59.2002	3.16769	57.6436	●
PbANKA_13_v3	1838464	1838973	510	1838718	245	50.116	3.06924	48.6126
PbANKA_13_v3	1852125	1853170	1046	1852800	433	193.659	6.35266	191.518	●
PbANKA_13_v3	1869691	1870891	1201	1870570	272	54.5314	3.03729	53.0008
PbANKA_13_v3	1879559	1881353	1795	1880624	539	276.508	7.59762	273.284	●
PbANKA_13_v3	1893604	1894107	504	1893872	277	64.9363	3.39549	63.3493	●
PbANKA_13_v3	1895798	1896460	663	1896125	420	179.364	6.01175	177.298	●
PbANKA_13_v3	1920856	1922279	1424	1921476	335	114.926	4.732	113.126	●
PbANKA_13_v3	1932385	1932900	516	1932636	328	98.2162	4.1655	96.482	●
PbANKA_13_v3	1942318	1943613	1296	1943099	508	218.22	6.08042	215.917	●
PbANKA_13_v3	1955106	1961363	6258	1958580	527	249.087	6.83008	246.44
PbANKA_13_v3	1973418	1974651	1234	1974253	330	106.36	4.45542	104.592	●
PbANKA_13_v3	1977533	1978641	1109	1978106	464	181.128	5.45009	179.053	●
PbANKA_13_v3	1993362	1995396	2035	1993949	539	310.268	8.9247	305.534	●
PbANKA_13_v3	1998364	1999698	1335	1998977	544	291.293	8.05473	287.545	●
PbANKA_13_v3	2003513	2008754	5242	2006467	537	242.3	6.45341	239.752	●
PbANKA_13_v3	2010185	2014328	4144	2010873	520	246.315	6.8467	243.708	●
PbANKA_13_v3	2038451	2040193	1743	2039263	516	272.312	7.8852	269.203	●
PbANKA_13_v3	2042995	2044233	1239	2043691	531	273.247	7.62632	270.113	●
PbANKA_13_v3	2045174	2046566	1393	2045466	365	133.328	5.05152	131.456	●
PbANKA_13_v3	2048129	2050413	2285	2048768	345	108.425	4.35761	106.65	●
PbANKA_13_v3	2055169	2057352	2184	2056732	537	213.241	5.56988	210.974	●
PbANKA_13_v3	2058989	2060288	1300	2059339	508	247.285	7.08374	244.664	●
PbANKA_13_v3	2071653	2072482	830	2072075	223	48.0729	3.17294	46.5828
PbANKA_13_v3	2077234	2079797	2564	2078737	422	156.897	5.16377	154.929	●
PbANKA_13_v3	2090985	2092343	1359	2091526	525	257.478	7.1577	254.687	●
PbANKA_13_v3	2119179	2120182	1004	2119656	208	46.2831	3.23723	44.8047	●
PbANKA_13_v3	2128490	2129695	1206	2129233	278	63.2351	3.32091	61.657	●
PbANKA_13_v3	2144586	2145162	577	2144868	356	128.029	4.96836	126.177	●
PbANKA_13_v3	2178843	2179361	519	2179097	259	54.6718	3.14179	53.1404
PbANKA_13_v3	2188968	2191223	2256	2190193	483	224.023	6.65812	221.672	●
PbANKA_13_v3	2209457	2210742	1286	2210122	546	295.765	8.18573	291.812	●
PbANKA_13_v3	2211861	2212423	563	2212081	211	54.6005	3.63132	53.0695	●
PbANKA_13_v3	2212570	2214632	2063	2213966	446	178.631	5.60006	176.568	●
PbANKA_13_v3	2233140	2234726	1587	2233557	511	283.661	8.45795	280.212	●
PbANKA_13_v3	2244087	2246477	2391	2245607	525	224.401	6.04959	222.046	●
PbANKA_13_v3	2274503	2275588	1086	2275019	535	247.278	6.64525	244.657	●
PbANKA_13_v3	2276676	2277843	1168	2277044	205	44.574	3.18258	43.1073
PbANKA_13_v3	2279639	2283022	3384	2282371	540	294.246	8.25125	290.368	●
PbANKA_13_v3	2297147	2299785	2639	2299251	541	272.421	7.41323	269.31	●
PbANKA_13_v3	2302163	2303577	1415	2302469	324	98.5929	4.22442	96.8572	●
PbANKA_13_v3	2308496	2309533	1038	2308900	528	302.313	8.85044	298.058	●
PbANKA_13_v3	2342550	2344142	1593	2343532	546	241.966	6.31762	239.423	●
PbANKA_13_v3	2362442	2364179	1738	2363402	412	186.785	6.44865	184.681	●
PbANKA_13_v3	2367726	2370590	2865	2369926	407	158.657	5.4249	156.683	●
PbANKA_13_v3	2374999	2375695	697	2375267	275	76.4517	3.88644	74.8103	●
PbANKA_13_v3	2385749	2386558	810	2386061	278	69.5839	3.57035	67.9738	●
PbANKA_13_v3	2394586	2395675	1090	2395135	538	306.437	8.78804	301.888	●
PbANKA_13_v3	2401171	2403824	2654	2402753	383	147.447	5.34412	145.518	●
PbANKA_13_v3	2413021	2414362	1342	2413722	499	277.98	8.49506	274.71	●
PbANKA_13_v3	2416719	2417662	944	2417392	188	38.9208	3.06544	37.4944	●
PbANKA_13_v3	2424493	2426651	2159	2425307	520	274.652	7.89572	271.482	●
PbANKA_13_v3	2434141	2435605	1465	2435105	510	202.24	5.55561	200.047	●
PbANKA_13_v3	2436546	2438188	1643	2437805	304	87.7369	4.02455	86.0458	●
PbANKA_13_v3	2455354	2456730	1377	2456286	509	212.812	5.89399	210.548	●
PbANKA_13_v3	2473349	2475426	2078	2473956	217	44.3984	3.0573	42.9327	●
PbANKA_13_v3	2475908	2476534	627	2476240	273	63.1899	3.36206	61.612	●
PbANKA_13_v3	2493425	2494339	915	2493963	520	222.33	6.05043	219.994	●
PbANKA_14_v3	83394	85678	2285	84633	540	256.247	6.86795	253.478	●
PbANKA_14_v3	89277	90514	1238	89889	529	297.771	8.63568	293.74	●
PbANKA_14_v3	109882	110848	967	110363	239	49.1553	3.07821	47.658
PbANKA_14_v3	200515	201789	1275	201003	495	241.779	7.11025	239.238	●
PbANKA_14_v3	233579	234708	1130	234186	444	210.581	6.83075	208.333	●
PbANKA_14_v3	247168	248607	1440	247702	527	278.427	7.9014	275.142	●
PbANKA_14_v3	261141	262611	1471	261813	542	300.19	8.44373	296.044	●
PbANKA_14_v3	264211	265328	1118	264478	261	65.6324	3.57642	64.042	●
PbANKA_14_v3	293703	294511	809	294038	375	151.455	5.62675	149.509	●
PbANKA_14_v3	299921	301793	1873	301461	307	100.136	4.49631	98.3936	●
PbANKA_14_v3	331975	333576	1602	332492	544	304.388	8.56812	299.998	●
PbANKA_14_v3	335263	336074	812	335680	257	67.9413	3.72017	66.3391	●
PbANKA_14_v3	346013	347473	1461	346960	543	274.175	7.44059	271.016	●
PbANKA_14_v3	352347	354357	2011	353325	538	245.906	6.55575	243.305	●
PbANKA_14_v3	356882	357829	948	357500	429	176.41	5.76129	174.358	●
PbANKA_14_v3	384978	386086	1109	385410	454	197.447	6.15272	195.283	●
PbANKA_14_v3	387008	387637	630	387231	234	69.3873	4.08558	67.7781	●
PbANKA_14_v3	391832	392777	946	392270	311	106.846	4.72834	105.077	●
PbANKA_14_v3	423622	424068	447	423866	204	43.6606	3.14675	42.1999	●
PbANKA_14_v3	426578	427079	502	426833	289	105.786	5.02672	104.021	●
PbANKA_14_v3	439641	440521	881	440166	232	50.8727	3.21586	49.3643
PbANKA_14_v3	458107	460827	2721	458865	519	281.573	8.19291	278.194	●
PbANKA_14_v3	470455	472442	1988	471941	489	205.599	5.92664	203.384	●
PbANKA_14_v3	508199	510901	2703	510173	546	281.677	7.65726	278.294	●
PbANKA_14_v3	532289	533233	945	532692	500	257.956	7.64117	255.157	●
PbANKA_14_v3	544882	545373	492	545125	223	54.3309	3.47142	52.8016	●
PbANKA_14_v3	552735	553788	1054	553331	449	213.426	6.85185	211.158	●
PbANKA_14_v3	564038	564750	713	564379	229	53.7555	3.37831	52.2296
PbANKA_14_v3	589829	591500	1672	590430	540	293.527	8.22306	289.676	●
PbANKA_14_v3	598319	600182	1864	599076	536	263.413	7.18015	260.51	●
PbANKA_14_v3	601251	601965	715	601553	266	66.5996	3.56638	65.0041	●
PbANKA_14_v3	610030	611351	1322	610783	528	311.568	9.25233	306.739	●
PbANKA_14_v3	632756	635080	2325	633990	532	265.733	7.33218	262.781	●
PbANKA_14_v3	648032	648503	472	648260	210	54.0054	3.61277	52.478	●
PbANKA_14_v3	663185	663710	526	663402	243	68.299	3.90655	66.6951	●
PbANKA_14_v3	689021	689843	823	689298	286	101.561	4.87283	99.8126	●
PbANKA_14_v3	690797	691718	922	691403	401	176.74	6.22996	174.686	●
PbANKA_14_v3	697741	699079	1339	698740	282	60.3011	3.17819	58.7385
PbANKA_14_v3	716474	719243	2770	718423	519	269.841	7.72844	266.795	●
PbANKA_14_v3	745949	747131	1183	746638	450	210.446	6.7144	208.198	●
PbANKA_14_v3	754351	755550	1200	754932	529	248.618	6.78239	245.977	●
PbANKA_14_v3	756184	758205	2022	757349	507	263.2	7.70801	260.3
PbANKA_14_v3	758580	760073	1494	759303	537	273.692	7.53127	270.546	●
PbANKA_14_v3	821681	822488	808	822014	319	71.1022	3.28443	69.4849	●
PbANKA_14_v3	822886	823564	679	823269	373	148.316	5.53021	146.383	●
PbANKA_14_v3	824914	826092	1179	825600	518	240.756	6.68617	238.228	●
PbANKA_14_v3	848219	849402	1184	849001	412	151.072	5.0872	149.128	●
PbANKA_14_v3	855844	856984	1141	856410	541	299.256	8.42818	295.159	●
PbANKA_14_v3	860368	862248	1881	861140	504	234.12	6.67742	231.667	●
PbANKA_14_v3	875656	876787	1132	876224	532	273.981	7.63487	270.828	●
PbANKA_14_v3	880409	881235	827	880956	228	48.5975	3.15022	47.1039
PbANKA_14_v3	881424	882348	925	881776	333	82.7016	3.56624	81.0328	●
PbANKA_14_v3	891408	892109	702	891777	275	87.7702	4.39063	86.0789	●
PbANKA_14_v3	896650	897729	1080	897245	497	258.689	7.73147	255.876	●
PbANKA_14_v3	903783	905182	1400	904317	306	98.8319	4.45445	97.0952	●
PbANKA_14_v3	907094	908395	1302	907833	530	248.149	6.75085	245.515	●
PbANKA_14_v3	912069	912922	854	912514	270	60.7394	3.29138	59.1745	●
PbANKA_14_v3	932725	933736	1012	933202	538	260.586	7.04814	257.737	●
PbANKA_14_v3	959163	959933	771	959635	334	95.633	4.00747	93.9094	●
PbANKA_14_v3	1033829	1035554	1726	1035019	500	252.333	7.42071	249.634	●
PbANKA_14_v3	1039341	1041220	1880	1039949	519	229.169	6.28357	226.769	●
PbANKA_14_v3	1044336	1044742	407	1044554	205	42.7313	3.09014	41.2772	●
PbANKA_14_v3	1046671	1048670	2000	1047124	541	253.324	6.75474	250.608	●
PbANKA_14_v3	1057015	1058537	1523	1057987	457	207.747	6.48753	205.518	●
PbANKA_14_v3	1059631	1060503	873	1060214	220	47.6371	3.18138	46.1498
PbANKA_14_v3	1066064	1066819	756	1066388	376	182.893	7.01826	180.809	●
PbANKA_14_v3	1088231	1088751	521	1088501	302	110.351	5.02492	108.568	●
PbANKA_14_v3	1092745	1093749	1005	1093413	483	214.876	6.32956	212.598	●
PbANKA_14_v3	1095263	1095789	527	1095521	319	117.678	5.08315	115.867	●
PbANKA_14_v3	1127728	1128534	807	1128077	323	88.4802	3.85654	86.7859	●
PbANKA_14_v3	1128924	1129614	691	1129219	340	97.6059	4.01838	95.8742	●
PbANKA_14_v3	1133558	1134100	543	1133840	206	44.7219	3.17966	43.254
PbANKA_14_v3	1136518	1138594	2077	1138250	394	176.518	6.34928	174.465	●
PbANKA_14_v3	1140518	1141409	892	1140827	242	55.8646	3.34281	54.3262
PbANKA_14_v3	1163466	1164885	1420	1164297	542	265.162	7.14029	262.221	●
PbANKA_14_v3	1168936	1170700	1765	1169470	543	267.164	7.1931	264.182	●
PbANKA_14_v3	1171494	1172632	1139	1172142	406	139.102	4.74966	137.207	●
PbANKA_14_v3	1175659	1176559	901	1176282	238	53.1817	3.26246	51.6593
PbANKA_14_v3	1186895	1187984	1090	1187241	328	94.1121	4.01277	92.3945	●
PbANKA_14_v3	1211708	1213525	1818	1212476	515	266.389	7.67368	263.422	●
PbANKA_14_v3	1214043	1215552	1510	1215133	292	89.7846	4.25131	88.0846	●
PbANKA_14_v3	1225877	1226717	841	1226222	467	233.499	7.31793	231.053	●
PbANKA_14_v3	1228930	1229411	482	1229191	252	62.3018	3.52544	60.7285	●
PbANKA_14_v3	1270292	1270966	675	1270603	346	130.407	5.21062	128.546	●
PbANKA_14_v3	1285539	1286885	1347	1286060	535	294.081	8.35121	290.211	●
PbANKA_14_v3	1317485	1318036	552	1317766	239	61.6203	3.63718	60.0507	●
PbANKA_14_v3	1323242	1325303	2062	1323788	539	279.206	7.69714	275.896	●
PbANKA_14_v3	1369171	1370713	1543	1370159	541	278.958	7.65049	275.657	●
PbANKA_14_v3	1379640	1380809	1170	1379964	233	59.6483	3.61353	58.0893
PbANKA_14_v3	1385286	1386594	1309	1385873	538	250.821	6.71736	248.147	●
PbANKA_14_v3	1424020	1425421	1402	1424509	543	294.096	8.18293	290.225	●
PbANKA_14_v3	1428583	1429555	973	1429174	547	252.004	6.62192	249.311	●
PbANKA_14_v3	1431086	1433711	2626	1431724	540	271.784	7.40814	268.689	●
PbANKA_14_v3	1439975	1441036	1062	1440362	314	89.027	3.96719	87.3303	●
PbANKA_14_v3	1481415	1482975	1561	1482376	510	262.054	7.60376	259.176	●
PbANKA_14_v3	1485239	1487965	2727	1486045	544	254.767	6.75683	252.025	●
PbANKA_14_v3	1505961	1506642	682	1506271	432	178.391	5.78958	176.329	●
PbANKA_14_v3	1512989	1513781	793	1513221	277	64.8146	3.39073	63.2282
PbANKA_14_v3	1569837	1570479	643	1570191	272	66.9603	3.52222	65.3629	●
PbANKA_14_v3	1573565	1574371	807	1574035	452	168.455	5.18501	166.439	●
PbANKA_14_v3	1594170	1595084	915	1594420	184	52.1574	3.89165	50.641	●
PbANKA_14_v3	1643934	1644494	561	1644221	330	89.676	3.83308	87.9765	●
PbANKA_14_v3	1685130	1685699	570	1685392	397	142.903	4.98712	140.992	●
PbANKA_14_v3	1699872	1701370	1499	1700276	512	209.775	5.76118	207.533	●
PbANKA_14_v3	1724687	1726102	1416	1725100	269	64.1785	3.43766	62.5956	●
PbANKA_14_v3	1731150	1731967	818	1731533	455	198.252	6.16659	196.083	●
PbANKA_14_v3	1748722	1749726	1005	1749181	531	255.534	6.98809	252.779	●
PbANKA_14_v3	1752929	1754087	1159	1753413	473	173.556	5.10679	171.517	●
PbANKA_14_v3	1757679	1758574	896	1758028	275	56.7791	3.09958	55.2355
PbANKA_14_v3	1782911	1784956	2046	1783411	534	240.985	6.45389	238.455	●
PbANKA_14_v3	1807674	1809153	1480	1808204	539	256.296	6.88538	253.527	●
PbANKA_14_v3	1814347	1815924	1578	1815348	536	228.399	6.0307	226.007	●
PbANKA_14_v3	1817158	1817924	767	1817570	437	185.224	5.96581	183.128	●
PbANKA_14_v3	1840008	1842686	2679	1840319	335	81.4622	3.50905	79.7991	●
PbANKA_14_v3	1843016	1843773	758	1843471	413	146.052	4.90333	144.128	●
PbANKA_14_v3	1851817	1852954	1138	1852678	390	144.672	5.14154	142.754	●
PbANKA_14_v3	1870785	1872328	1544	1871822	347	123.085	4.89624	121.253	●
PbANKA_14_v3	1888395	1889075	681	1888727	265	71.0734	3.76787	69.4561	●
PbANKA_14_v3	1902060	1903594	1535	1903106	411	140.658	4.74583	138.756	●
PbANKA_14_v3	1909381	1910868	1488	1909948	541	259.188	6.95161	256.366	●
PbANKA_14_v3	1916481	1917723	1243	1917471	249	49.7154	3.02095	48.2145
PbANKA_14_v3	1921444	1923130	1687	1922006	421	153.145	5.04821	151.192	●
PbANKA_14_v3	1927332	1928426	1095	1927648	242	54.1122	3.26585	52.5842
PbANKA_14_v3	1932657	1934316	1660	1933659	541	259.827	6.97336	256.993	●
PbANKA_14_v3	1941122	1941724	603	1941488	208	42.168	3.03372	40.7177
PbANKA_14_v3	1943703	1944887	1185	1944503	456	185.352	5.69542	183.256	●
PbANKA_14_v3	1969001	1969631	631	1969297	363	132.855	5.06083	130.984	●
PbANKA_14_v3	1974227	1975834	1608	1974997	528	263.719	7.3303	260.808	●
PbANKA_14_v3	1976331	1977182	852	1976807	243	49.0498	3.04088	47.5532	●
PbANKA_14_v3	1985254	1986606	1353	1985962	539	271.855	7.42848	268.758	●
PbANKA_14_v3	1995627	1996555	929	1996081	528	244.61	6.66235	242.028	●
PbANKA_14_v3	2011991	2013354	1364	2012463	522	219.288	5.92931	216.977	●
PbANKA_14_v3	2015669	2017164	1496	2015941	393	140.069	4.93607	138.17	●
PbANKA_14_v3	2027533	2028567	1035	2027992	505	231.824	6.58119	229.396	●
PbANKA_14_v3	2033263	2034145	883	2033588	252	64.1079	3.60513	62.5253
PbANKA_14_v3	2044450	2046276	1827	2045529	473	188.076	5.56307	185.965	●
PbANKA_14_v3	2053045	2053944	900	2053619	222	50.4705	3.29579	48.9647
PbANKA_14_v3	2061274	2063570	2297	2061959	380	127.631	4.65105	125.781	●
PbANKA_14_v3	2073428	2074514	1087	2073883	541	285.136	7.8805	281.629	●
PbANKA_14_v3	2082522	2083331	810	2082850	431	160.287	5.16784	158.306	●
PbANKA_14_v3	2131237	2134682	3446	2132107	426	201.65	6.80643	199.461	●
PbANKA_14_v3	2138065	2139351	1287	2139053	364	147.354	5.63649	145.425	●
PbANKA_14_v3	2155213	2156332	1120	2156104	269	71.9751	3.76232	70.3539	●
PbANKA_14_v3	2156810	2157298	489	2157056	263	74.0846	3.92434	72.4537	●
PbANKA_14_v3	2167875	2168950	1076	2168513	291	86.4371	4.12167	84.7515	●
PbANKA_14_v3	2179127	2180211	1085	2179704	211	43.3307	3.06195	41.8723
PbANKA_14_v3	2181193	2182922	1730	2181857	328	71.5881	3.23748	69.9686	●
PbANKA_14_v3	2199751	2200462	712	2200017	317	115.33	5.01028	113.528	●
PbANKA_14_v3	2222157	2223290	1134	2222975	449	204.773	6.51023	202.564	●
PbANKA_14_v3	2232554	2234494	1941	2233731	541	268.896	7.28786	265.872
PbANKA_14_v3	2265822	2267447	1626	2266290	433	181.208	5.87821	179.132	●
PbANKA_14_v3	2271289	2271895	607	2271595	397	162.496	5.71991	160.505	●
PbANKA_14_v3	2273915	2277444	3530	2276143	539	273.193	7.47677	270.062
PbANKA_14_v3	2285309	2286386	1078	2285612	290	84.4382	4.04984	82.7613	●
PbANKA_14_v3	2299169	2302091	2923	2301195	543	246.656	6.50765	244.043	●
PbANKA_14_v3	2305938	2307269	1332	2306648	524	264.643	7.43658	261.713	●
PbANKA_14_v3	2317631	2319149	1519	2318553	390	149.372	5.31743	147.435	●
PbANKA_14_v3	2322185	2325157	2973	2322775	514	220.9	6.08529	218.576	●
PbANKA_14_v3	2326927	2329045	2119	2328164	213	49.415	3.34023	47.916
PbANKA_14_v3	2339555	2340433	879	2339960	240	56.1141	3.37367	54.5742	●
PbANKA_14_v3	2384412	2387268	2857	2385078	514	285.043	8.44737	281.541	●
PbANKA_14_v3	2394481	2395697	1217	2395142	539	288.036	8.03059	284.431	●
PbANKA_14_v3	2414455	2415507	1053	2414919	510	239.121	6.75675	236.614	●

## Sheet: 2c
Supplementary file 2c. Peaks identified in ChIP-seq of PFG using AP2-FG(-) <Exp 1>
chr	start	end	length	abs_summit	pileup	-log10(p-value)	fold_enrichment	-log10(q-value)	common
PbANKA_01_v3	53777	55278	1502	54496	154	77.4535	7.00628	74.6651	●
PbANKA_01_v3	110765	111452	688	111055	154	94.5675	9.20666	90.2904	●
PbANKA_01_v3	138054	138921	868	138532	70	21.6045	3.90824	19.8336	●
PbANKA_01_v3	146076	146462	387	146187	83	26.4604	4.09022	24.619	●
PbANKA_01_v3	172810	173306	497	173064	99	42.513	5.59701	40.4486	●
PbANKA_01_v3	185933	186798	866	186539	77	28.0827	4.60411	26.2194	●
PbANKA_01_v3	187863	188295	433	188047	131	67.2033	7.09414	64.715	●
PbANKA_01_v3	204311	205320	1010	204944	150	80.1732	7.56696	77.2753	●
PbANKA_01_v3	207267	207714	448	207503	57	13.7133	3.13343	12.0833
PbANKA_01_v3	210879	211215	337	211083	69	21.3252	3.90692	19.5587
PbANKA_01_v3	221829	222237	409	222046	88	31.8832	4.6362	29.9675	●
PbANKA_01_v3	254653	255402	750	254923	103	47.4857	6.09129	45.348	●
PbANKA_01_v3	275145	275600	456	275402	115	53.0128	6.15273	50.7899	●
PbANKA_01_v3	321763	322109	347	321966	79	23.5278	3.83619	21.7276
PbANKA_01_v3	330600	331002	403	330836	72	22.8594	4.01833	21.0689	●
PbANKA_01_v3	345038	345962	925	345370	79	25.3452	4.09415	23.5191
PbANKA_01_v3	362221	363350	1130	362954	108	45.6833	5.54824	43.5737	●
PbANKA_01_v3	381168	381712	545	381502	97	32.9595	4.39723	31.0288	●
PbANKA_01_v3	400363	401074	712	400801	136	73.1991	7.57599	70.5577	●
PbANKA_01_v3	408843	409315	473	409155	71	20.7208	3.73168	18.9637	●
PbANKA_01_v3	416257	417618	1362	416695	154	65.3706	5.72094	62.9225
PbANKA_01_v3	427489	429044	1556	428212	154	90.672	8.66255	86.9239	●
PbANKA_01_v3	429137	429749	613	429514	93	32.4631	4.49472	30.5392
PbANKA_01_v3	431775	432089	315	432023	57	14.3299	3.23717	12.6871	●
PbANKA_01_v3	437700	438955	1256	438480	108	46.6445	5.67804	44.5199	●
PbANKA_01_v3	440029	441953	1925	440888	151	72.6248	6.61634	70.0014	●
PbANKA_01_v3	454600	455151	552	454803	126	53.0825	5.59358	50.8571	●
PbANKA_01_v3	463225	463762	538	463442	63	16.1467	3.3216	14.468
PbANKA_02_v3	23871	24300	430	24148	96	49.3837	6.90552	47.2165	●
PbANKA_02_v3	85231	86022	792	85569	148	67.5916	6.20744	65.0958	●
PbANKA_02_v3	87777	88583	807	88084	132	67.4908	7.06854	64.9973	●
PbANKA_02_v3	98189	98647	459	98413	99	41.1978	5.40739	39.1516	●
PbANKA_02_v3	112451	113219	769	112838	153	71.6943	6.41575	69.0971	●
PbANKA_02_v3	114440	114953	514	114887	60	14.883	3.2234	13.2289
PbANKA_02_v3	134349	135500	1152	134992	148	86.7479	8.57818	83.4091	●
PbANKA_02_v3	146704	148088	1385	147648	119	52.8257	5.90628	50.6057
PbANKA_02_v3	148176	149177	1002	148780	147	78.4889	7.54456	75.6592	●
PbANKA_02_v3	154987	156246	1260	155495	154	94.9526	9.26193	90.6129	●
PbANKA_02_v3	157902	158939	1038	158725	86	33.1525	4.92184	31.2191	●
PbANKA_02_v3	169333	169846	514	169524	111	39.0931	4.6002	37.0759
PbANKA_02_v3	170992	171453	462	171243	100	41.2918	5.36709	39.244	●
PbANKA_02_v3	180303	181123	821	180782	89	22.619	3.40821	20.8323
PbANKA_02_v3	202486	204012	1527	203178	148	86.4415	8.53531	83.1271	●
PbANKA_02_v3	255851	256367	517	256161	65	16.9022	3.36991	15.2097
PbANKA_02_v3	290996	291536	541	291320	65	19.8339	3.83888	18.0908
PbANKA_02_v3	323049	325114	2066	324534	154	89.8238	8.54763	86.1767	●
PbANKA_02_v3	326756	328279	1524	327488	153	87.5614	8.31786	84.1608	●
PbANKA_02_v3	346265	346549	285	346409	72	18.93	3.4342	17.2017	●
PbANKA_02_v3	358796	359857	1062	359156	141	74.3551	7.39708	71.6756	●
PbANKA_02_v3	393371	393854	484	393577	79	17.9894	3.11041	16.2771
PbANKA_02_v3	412001	412461	461	412355	75	19.4441	3.4101	17.7071
PbANKA_02_v3	435929	436245	317	436080	65	17.7421	3.50069	16.0342	●
PbANKA_02_v3	444472	445280	809	444768	129	53.3854	5.49448	51.1554	●
PbANKA_02_v3	513537	514904	1368	514305	154	85.1197	7.93241	81.923	●
PbANKA_02_v3	537750	538114	365	537936	85	25.2902	3.85879	23.4652
PbANKA_02_v3	541328	542728	1401	542454	102	43.6216	5.58718	41.5412	●
PbANKA_02_v3	550724	551102	379	550947	103	32.9289	4.1769	30.9987
PbANKA_03_v3	44539	44923	385	44661	83	20.8258	3.35551	19.0671
PbANKA_03_v3	47371	47814	444	47551	73	22.6823	3.94841	20.8946	●
PbANKA_03_v3	53593	54841	1249	54357	154	91.1438	8.72702	87.327	●
PbANKA_03_v3	56081	56973	893	56368	126	67.8807	7.53406	65.3766	●
PbANKA_03_v3	66874	68249	1376	67737	145	65.7295	6.14424	63.2747
PbANKA_03_v3	68410	69518	1109	68865	147	77.6897	7.44339	74.8916	●
PbANKA_03_v3	87775	87864	90	87831	52	12.9676	3.18257	11.3535
PbANKA_03_v3	107176	107828	653	107556	149	76.1162	7.12959	73.3785	●
PbANKA_03_v3	117428	117962	535	117678	68	19.2714	3.62587	17.5376	●
PbANKA_03_v3	133680	134214	535	133959	110	36.2454	4.31569	34.2693	●
PbANKA_03_v3	136434	136914	481	136717	76	24.9233	4.15989	23.1033	●
PbANKA_03_v3	146970	147412	443	147100	77	28.6925	4.70244	26.8215	●
PbANKA_03_v3	192133	193073	941	192519	148	77.5692	7.36648	74.7748	●
PbANKA_03_v3	226331	226650	320	226491	70	21.0116	3.81579	19.2498	●
PbANKA_03_v3	238898	239439	542	239047	68	20.4384	3.8084	18.6857	●
PbANKA_03_v3	242338	243680	1343	243263	154	75.163	6.74692	72.4571	●
PbANKA_03_v3	254837	255580	744	255212	77	23.2547	3.87284	21.4584	●
PbANKA_03_v3	258539	259610	1072	258900	144	68.5061	6.5061	65.9878	●
PbANKA_03_v3	295212	295661	450	295437	94	35.8995	4.91701	33.928	●
PbANKA_03_v3	305005	305656	652	305166	96	35.1013	4.71558	33.141	●
PbANKA_03_v3	341909	342400	492	342095	63	16.5881	3.3914	14.9006
PbANKA_03_v3	352736	353208	473	352909	71	19.2268	3.51042	17.4938	●
PbANKA_03_v3	353436	354999	1564	354073	153	85.0266	7.98712	81.8401	●
PbANKA_03_v3	369203	369614	412	369452	74	25.4039	4.32709	23.5773	●
PbANKA_03_v3	375278	375831	554	375515	81	20.8601	3.41618	19.1006
PbANKA_03_v3	377976	378313	338	378150	79	30.9444	4.95896	29.0423	●
PbANKA_03_v3	401490	401816	327	401654	72	21.4515	3.80273	19.683
PbANKA_03_v3	453718	454391	674	454072	135	70.2759	7.24733	67.7138	●
PbANKA_03_v3	482900	483228	329	483116	62	16.9676	3.48997	15.2732
PbANKA_03_v3	494191	496168	1978	495488	154	90.8602	8.68823	87.0904	●
PbANKA_03_v3	508886	509390	505	509165	105	40.2693	4.98665	38.2357	●
PbANKA_03_v3	535859	536260	402	535931	82	21.0319	3.40908	19.27	●
PbANKA_03_v3	560987	562084	1098	561420	150	82.4664	7.85846	79.4512	●
PbANKA_03_v3	624874	625030	157	624902	14	5.4687	3.38345	4.09852
PbANKA_04_v3	38642	39252	611	38984	78	27.2389	4.42164	25.3869	●
PbANKA_04_v3	46941	47508	568	47226	141	72.6889	7.18256	70.0628	●
PbANKA_04_v3	61885	62366	482	62096	142	64.3506	6.13292	61.9263	●
PbANKA_04_v3	66529	66844	316	66707	82	23.4814	3.72418	21.6817	●
PbANKA_04_v3	73053	74876	1824	74121	154	80.9015	7.41151	77.9684	●
PbANKA_04_v3	74995	76706	1712	75405	146	54.6655	4.98359	52.4158
PbANKA_04_v3	79869	81413	1545	80348	152	78.6811	7.26305	75.8457	●
PbANKA_04_v3	93314	94878	1565	93997	154	100.649	10.1117	94.8654	●
PbANKA_04_v3	98380	99555	1176	99013	137	80.6252	8.56784	77.7086	●
PbANKA_04_v3	102275	102964	690	102741	118	56.0215	6.3864	53.7506	●
PbANKA_04_v3	137135	137570	436	137345	70	20.0242	3.66479	18.278
PbANKA_04_v3	139066	139844	779	139536	68	19.491	3.65981	17.7534	●
PbANKA_04_v3	163360	164058	699	163731	74	21.3257	3.70796	19.559
PbANKA_04_v3	171599	172314	716	171913	98	37.1209	4.89451	35.1322	●
PbANKA_04_v3	179405	180514	1110	180064	131	61.0259	6.29778	58.6677	●
PbANKA_04_v3	194655	195188	534	194985	87	27.9385	4.13489	26.0773	●
PbANKA_04_v3	200137	201265	1129	200865	153	83.3558	7.77498	80.2852	●
PbANKA_04_v3	214717	216140	1424	215254	153	81.5217	7.54732	78.5556	●
PbANKA_04_v3	245692	246203	512	245911	75	17.3552	3.13216	15.654
PbANKA_04_v3	259356	259622	267	259506	73	24.4412	4.22175	22.6279	●
PbANKA_04_v3	262558	263027	470	262819	120	61.0708	6.96829	58.7122	●
PbANKA_04_v3	264660	265729	1070	265220	153	83.118	7.74515	80.0598	●
PbANKA_04_v3	271576	272187	612	271981	60	14.5989	3.17762	12.9506
PbANKA_04_v3	298879	299852	974	299339	153	77.2426	7.03676	74.4621	●
PbANKA_04_v3	310930	312004	1075	311522	145	64.3732	5.99669	61.9468	●
PbANKA_04_v3	340670	341428	759	340831	91	32.15	4.53818	30.2306	●
PbANKA_04_v3	343032	344056	1025	343333	116	49.0686	5.58212	46.906	●
PbANKA_04_v3	354940	356175	1236	355509	129	50.6543	5.19305	48.4675	●
PbANKA_04_v3	358748	360000	1253	359404	153	86.6294	8.19499	83.3031	●
PbANKA_04_v3	365715	367373	1659	366164	154	88.9162	8.42601	85.3788	●
PbANKA_04_v3	381511	382557	1047	382015	105	45.0243	5.61858	42.9237	●
PbANKA_04_v3	387103	387474	372	387235	93	28.4065	3.97801	26.5392
PbANKA_04_v3	387624	388095	472	387847	90	25.0451	3.66646	23.2234
PbANKA_04_v3	459995	460650	656	460303	116	59.7232	7.04917	57.3868	●
PbANKA_04_v3	477427	478375	949	477896	144	68.5061	6.5061	65.9878	●
PbANKA_04_v3	483630	485105	1476	484537	154	86.8655	8.15641	83.5182	●
PbANKA_04_v3	501767	504340	2574	503445	154	68.4183	6.02641	65.903	●
PbANKA_04_v3	568726	568853	128	568793	61	17.136	3.55753	15.4386	●
PbANKA_04_v3	619326	619678	353	619519	69	20.986	3.85319	19.2248	●
PbANKA_04_v3	638298	638780	483	638489	109	54.142	6.69891	51.9001	●
PbANKA_04_v3	645981	647462	1482	646487	154	92.7796	8.95359	88.7361	●
PbANKA_04_v3	662607	663834	1228	663098	154	100.424	10.077	94.8654	●
PbANKA_04_v3	666318	667194	877	666519	81	24.2147	3.8576	22.4047	●
PbANKA_04_v3	672746	672926	181	672832	72	23.9548	4.19125	22.1485
PbANKA_05_v3	25460	25687	228	25588	39	13.1439	3.89482	11.526	●
PbANKA_05_v3	74685	75277	593	74972	113	55.1231	6.57417	52.8663	●
PbANKA_05_v3	94708	95393	686	95155	112	45.4187	5.31596	43.3124	●
PbANKA_05_v3	98617	100003	1387	99407	154	81.3909	7.4705	78.4327	●
PbANKA_05_v3	126538	126918	381	126732	99	44.7549	5.9314	42.6582	●
PbANKA_05_v3	141757	142114	358	142025	58	14.461	3.22354	12.8154	●
PbANKA_05_v3	145604	146217	614	145851	91	25.6998	3.71467	23.8689
PbANKA_05_v3	172546	173521	976	173086	100	45.8389	6.03328	43.7264	●
PbANKA_05_v3	176259	177798	1540	176892	154	96.6779	9.51289	92.131	●
PbANKA_05_v3	200755	202001	1247	201209	136	61.1169	6.05388	58.7567	●
PbANKA_05_v3	212453	213621	1169	212755	97	29.9111	4.02517	28.0236	●
PbANKA_05_v3	221538	222876	1339	222246	154	75.163	6.74692	72.4571	●
PbANKA_05_v3	256911	257243	333	257130	65	14.4611	3.00487	12.8155
PbANKA_05_v3	279174	279675	502	279451	122	62.6708	7.06197	60.2812	●
PbANKA_05_v3	292848	294153	1306	293260	154	93.8253	9.10091	89.6265	●
PbANKA_05_v3	298373	298795	423	298486	87	32.6925	4.80174	30.7656	●
PbANKA_05_v3	345166	346253	1088	345928	62	14.4569	3.09154	12.8114
PbANKA_05_v3	346354	347558	1205	346952	133	61.1157	6.20368	58.7557	●
PbANKA_05_v3	364422	364982	561	364633	129	60.5447	6.34644	58.1933	●
PbANKA_05_v3	365797	366656	860	366363	131	57.859	5.91715	55.5584	●
PbANKA_05_v3	379290	380013	724	379657	73	16.9161	3.12763	15.2229	●
PbANKA_05_v3	413232	414390	1159	413851	145	73.2167	7.00993	70.5749	●
PbANKA_05_v3	415897	416375	479	416180	92	38.9046	5.46394	36.8901	●
PbANKA_05_v3	419560	420238	679	420152	64	19.1625	3.77085	17.4305
PbANKA_05_v3	438861	439599	739	439193	151	73.5164	6.71672	70.8645	●
PbANKA_05_v3	448118	448363	246	448263	53	13.3588	3.21555	11.7366
PbANKA_05_v3	465302	466330	1029	465837	135	72.7044	7.57718	70.078	●
PbANKA_05_v3	470725	470953	229	470821	69	15.2036	3.00213	13.5427
PbANKA_05_v3	471134	471855	722	471491	145	72.9798	6.98116	70.3438	●
PbANKA_05_v3	490484	491161	678	490850	139	75.5118	7.68459	72.7937	●
PbANKA_05_v3	491674	492279	606	492159	91	29.0409	4.12801	27.1652	●
PbANKA_05_v3	494030	494409	380	494135	57	13.5174	3.10082	11.8917
PbANKA_05_v3	547618	548043	426	547853	94	27.1495	3.79492	25.2988	●
PbANKA_05_v3	560225	560788	564	560364	79	27.783	4.45717	25.9238	●
PbANKA_05_v3	561443	563925	2483	562663	154	89.7083	8.53207	86.0829	●
PbANKA_05_v3	571061	571306	246	571163	64	15.664	3.21356	13.9944
PbANKA_05_v3	618427	618796	370	618576	80	24.5254	3.93776	22.7111
PbANKA_05_v3	627310	629215	1906	628004	154	72.7965	6.48691	70.1667	●
PbANKA_05_v3	643141	644062	922	643614	154	93.0735	8.99479	88.9789	●
PbANKA_05_v3	650168	650678	511	650413	84	26.0726	3.99873	24.2364	●
PbANKA_05_v3	676151	676667	517	676444	122	46.8415	5.052	44.7136	●
PbANKA_05_v3	721489	722138	650	721884	147	72.9237	6.86207	70.2896	●
PbANKA_05_v3	725866	727285	1420	726615	148	77.5692	7.36648	74.7748	●
PbANKA_05_v3	730368	731213	846	730681	147	81.4939	7.93487	78.5288	●
PbANKA_05_v3	791618	792035	418	791813	93	39.3841	5.47844	37.363	●
PbANKA_05_v3	792523	793393	871	792875	144	83.582	8.44038	80.494	●
PbANKA_05_v3	828242	829132	891	828707	153	89.9555	8.64032	86.2881	●
PbANKA_05_v3	844468	847567	3100	845015	154	77.0042	6.9548	74.233	●
PbANKA_05_v3	870175	871031	857	870772	134	57.9789	5.78982	55.6734	●
PbANKA_05_v3	878697	880221	1525	879585	150	78.3446	7.34075	75.5203	●
PbANKA_05_v3	882099	882751	653	882434	129	62.9418	6.65299	60.5437	●
PbANKA_05_v3	892036	893733	1698	892961	153	89.2447	8.54355	85.6679
PbANKA_05_v3	909078	909552	475	909288	135	56.9397	5.62946	54.6543	●
PbANKA_06_v3	84035	84420	386	84325	76	18.8638	3.30234	17.1368	●
PbANKA_06_v3	94448	94746	299	94558	61	17.4638	3.61288	15.7607	●
PbANKA_06_v3	98103	98814	712	98386	117	43.2646	4.84664	41.1899	●
PbANKA_06_v3	106081	106817	737	106474	143	76.1497	7.50127	73.4102	●
PbANKA_06_v3	132250	132908	659	132596	141	66.8687	6.47118	64.3874	●
PbANKA_06_v3	135149	136049	901	135534	141	72.3666	7.14163	69.7503	●
PbANKA_06_v3	144203	145127	925	144598	154	71.674	6.36635	69.0776	●
PbANKA_06_v3	149367	149824	458	149643	88	24.0376	3.60468	22.2303
PbANKA_06_v3	150142	150993	852	150544	113	50.0123	5.86031	47.8351	●
PbANKA_06_v3	151433	152690	1258	151929	81	25.1493	3.98637	23.3261	●
PbANKA_06_v3	167047	167477	431	167240	70	21.6971	3.9228	19.9247	●
PbANKA_06_v3	170818	172495	1678	171168	153	82.8134	7.70708	79.7773	●
PbANKA_06_v3	178135	179040	906	178646	97	40.1131	5.36054	38.0819	●
PbANKA_06_v3	185714	186396	683	186083	133	64.5395	6.62489	62.1084	●
PbANKA_06_v3	190736	191601	866	191176	154	85.6126	7.99514	82.3799	●
PbANKA_06_v3	216677	218273	1597	217426	128	46.7937	4.82241	44.6667	●
PbANKA_06_v3	225372	225777	406	225563	106	37.95	4.65755	35.9493	●
PbANKA_06_v3	259355	260633	1279	260019	152	83.2774	7.83006	80.211	●
PbANKA_06_v3	288850	289539	690	289379	65	15.8409	3.20854	14.1681	●
PbANKA_06_v3	296449	297367	919	296867	154	91.0964	8.72053	87.2894	●
PbANKA_06_v3	305293	306169	877	305821	151	86.8488	8.36693	83.5027	●
PbANKA_06_v3	350337	350709	373	350564	75	20.2334	3.5185	18.484	●
PbANKA_06_v3	359251	359848	598	359521	109	43.2512	5.18278	41.1767	●
PbANKA_06_v3	360321	361992	1672	361734	129	63.8493	6.77198	61.4326	●
PbANKA_06_v3	366739	367113	375	366996	78	25.71	4.19022	23.879	●
PbANKA_06_v3	367221	368647	1427	367963	69	18.4187	3.46076	16.6992	●
PbANKA_06_v3	371605	372744	1140	372234	151	83.4463	7.918	80.3674	●
PbANKA_06_v3	376660	377071	412	376733	67	17.298	3.36188	15.5975
PbANKA_06_v3	399541	400468	928	399981	139	60.3911	5.8325	58.0428	●
PbANKA_06_v3	405195	405564	370	405359	86	31.4403	4.66706	29.5308	●
PbANKA_06_v3	407275	407981	707	407634	120	50.7963	5.60183	48.6071	●
PbANKA_06_v3	425325	426383	1059	425797	154	76.4438	6.891	73.693	●
PbANKA_06_v3	428913	429872	960	429643	84	31.4592	4.76901	29.5494	●
PbANKA_06_v3	442442	442919	478	442712	113	44.8145	5.19518	42.7169	●
PbANKA_06_v3	445598	447281	1684	446133	154	82.9677	7.66312	79.92	●
PbANKA_06_v3	452210	453562	1353	453049	154	69.2118	6.10794	66.6776	●
PbANKA_06_v3	462367	464015	1649	463507	154	85.6553	8.00059	82.4199	●
PbANKA_06_v3	466948	468096	1149	467811	91	25.7959	3.72619	23.9634	●
PbANKA_06_v3	486705	487044	340	486899	67	18.8183	3.5938	17.0923	●
PbANKA_06_v3	512363	513512	1150	512951	152	91.9255	8.99325	88.0041	●
PbANKA_06_v3	524842	525374	533	525240	64	17.0601	3.42997	15.3645
PbANKA_06_v3	533489	535115	1627	534553	154	93.0539	8.99203	88.9721	●
PbANKA_06_v3	542555	543634	1080	543190	154	80.765	7.39512	77.8405	●
PbANKA_06_v3	550055	550337	283	550204	90	23.5657	3.49148	21.765
PbANKA_06_v3	550438	550869	432	550714	78	18.1506	3.15578	16.4356
PbANKA_06_v3	599657	600272	616	599932	140	71.4899	7.09133	68.8975	●
PbANKA_06_v3	616354	616816	463	616744	68	15.6821	3.09601	14.0118
PbANKA_06_v3	618852	620084	1233	619642	153	77.0811	7.01804	74.3063	●
PbANKA_06_v3	630986	631822	837	631478	58	15.0085	3.31548	13.3516	●
PbANKA_06_v3	711038	711957	920	711453	152	75.2817	6.86506	72.5717	●
PbANKA_06_v3	773443	773676	234	773562	68	21.2337	3.9359	19.4685	●
PbANKA_06_v3	774146	774941	796	774543	150	87.0781	8.472	83.7157	●
PbANKA_06_v3	786747	787546	800	787160	146	74.8107	7.1463	72.1152	●
PbANKA_06_v3	789204	790749	1546	789936	154	89.0892	8.44909	85.5296	●
PbANKA_06_v3	792116	794065	1950	793354	154	87.3576	8.22045	83.9746	●
PbANKA_06_v3	811622	812787	1166	812250	153	83.118	7.74515	80.0598	●
PbANKA_06_v3	826112	827408	1297	826703	154	89.7083	8.53207	86.0829	●
PbANKA_06_v3	855356	855614	259	855484	58	14.2257	3.18444	12.5852
PbANKA_06_v3	864280	865170	891	864465	147	83.1418	8.15566	80.0826	●
PbANKA_06_v3	866766	867907	1142	867359	152	80.1492	7.44047	77.2521	●
PbANKA_06_v3	870042	870492	451	870279	122	56.274	6.18841	53.9987	●
PbANKA_06_v3	892806	893388	583	893073	144	64.3615	6.0408	61.9359	●
PbANKA_06_v3	907117	907445	329	907272	81	28.7377	4.5062	26.8661	●
PbANKA_07_v3	70278	71670	1393	70415	90	24.3697	3.58595	22.5576
PbANKA_07_v3	84478	84876	399	84660	72	16.8736	3.1492	15.1814
PbANKA_07_v3	127085	127919	835	127635	130	50.0842	5.09329	47.9058	●
PbANKA_07_v3	141318	142535	1218	141884	154	89.4644	8.4993	85.8699	●
PbANKA_07_v3	145083	146658	1576	145820	154	89.8331	8.54887	86.1816	●
PbANKA_07_v3	164948	166083	1136	165515	150	84.7506	8.15772	81.5799	●
PbANKA_07_v3	170589	171738	1150	171227	154	70.8392	6.27782	68.2654	●
PbANKA_07_v3	186223	186908	686	186550	148	71.8707	6.68558	69.2678	●
PbANKA_07_v3	232159	233713	1555	232797	153	91.7433	8.88768	87.8377	●
PbANKA_07_v3	235296	236285	990	235801	154	92.2449	8.87901	88.2676	●
PbANKA_07_v3	277684	277955	272	277838	72	22.3781	3.9438	20.5951	●
PbANKA_07_v3	280333	281317	985	280780	153	86.6294	8.19499	83.3031	●
PbANKA_07_v3	288753	289779	1027	289221	154	77.0042	6.9548	74.233	●
PbANKA_07_v3	292295	292885	591	292582	95	27.7524	3.83487	25.8936	●
PbANKA_07_v3	295405	296509	1105	295965	134	74.6499	7.92414	71.96	●
PbANKA_07_v3	306768	308362	1595	307460	147	73.7691	6.96249	71.108	●
PbANKA_07_v3	309801	311645	1845	310571	145	76.7611	7.45164	73.9991	●
PbANKA_07_v3	312951	313711	761	313253	134	65.753	6.72064	63.2978	●
PbANKA_07_v3	339310	339911	602	339640	90	31.5128	4.49472	29.6024	●
PbANKA_07_v3	348221	349331	1111	348772	153	86.6206	8.19384	83.2963	●
PbANKA_07_v3	360642	361022	381	360807	103	40.5957	5.12144	38.5578	●
PbANKA_07_v3	369230	371569	2340	370468	154	85.1197	7.93241	81.923	●
PbANKA_07_v3	406404	406906	503	406683	135	62.7529	6.29627	60.3601	●
PbANKA_07_v3	418573	419134	562	418825	131	74.829	8.18362	72.1331	●
PbANKA_07_v3	446741	446903	163	446820	55	12.832	3.05213	11.221	●
PbANKA_07_v3	457159	457919	761	457449	101	35.0987	4.50727	33.1386
PbANKA_07_v3	465848	466830	983	466241	111	50.3398	6.01756	48.1583	●
PbANKA_07_v3	469844	470771	928	470300	147	77.7909	7.45613	74.9903	●
PbANKA_07_v3	471908	472827	920	472269	64	16.562	3.35188	14.8751
PbANKA_07_v3	477160	477575	416	477415	62	16.1372	3.35533	14.4586	●
PbANKA_07_v3	479602	480604	1003	480160	92	35.5749	4.9699	33.6084	●
PbANKA_07_v3	482201	485764	3564	484961	154	86.9531	8.16777	83.5992	●
PbANKA_07_v3	491824	494642	2819	492437	154	69.2118	6.10794	66.6776	●
PbANKA_07_v3	495500	495927	428	495640	79	21.3096	3.53511	19.5432
PbANKA_07_v3	504408	505049	642	504807	120	64.7319	7.51238	62.2973	●
PbANKA_07_v3	512027	513000	974	512435	145	82.5491	8.22029	79.5276
PbANKA_07_v3	532769	533129	361	533042	59	15.3954	3.34337	13.7308	●
PbANKA_07_v3	571002	571297	296	571150	61	15.6516	3.3128	13.9824
PbANKA_07_v3	579346	579842	497	579635	121	59.7493	6.71508	57.4127	●
PbANKA_07_v3	586792	586929	138	586860	54	13.2973	3.1674	11.6765	●
PbANKA_07_v3	591668	592870	1203	592214	154	83.7258	7.75713	80.6294	●
PbANKA_07_v3	598139	598479	341	598421	67	17.6839	3.41993	15.9767
PbANKA_07_v3	610429	610842	414	610611	94	39.8249	5.48684	37.7976	●
PbANKA_07_v3	612872	614221	1350	613636	153	79.0147	7.24475	76.1654
PbANKA_07_v3	622039	622440	402	622155	89	26.3654	3.85988	24.5253
PbANKA_07_v3	628759	629204	446	628964	59	14.5126	3.19735	12.8661	●
PbANKA_07_v3	636925	637574	650	637185	147	76.47	7.29105	73.7185	●
PbANKA_07_v3	642260	645464	3205	643000	153	76.2272	6.91974	73.4848	●
PbANKA_07_v3	670034	671268	1235	670699	154	77.9508	7.06362	75.1445	●
PbANKA_07_v3	679199	680495	1297	680026	148	79.6267	7.62535	76.7524	●
PbANKA_07_v3	749801	750338	538	750050	117	53.4401	6.09576	51.2096	●
PbANKA_07_v3	751352	752019	668	751566	78	20.9921	3.52461	19.2308
PbANKA_07_v3	763840	765040	1201	764321	154	88.5233	8.37381	85.0299	●
PbANKA_07_v3	766126	767667	1542	766916	154	89.5104	8.50547	85.9107	●
PbANKA_07_v3	783967	784526	560	784167	104	44.9425	5.66237	42.8432	●
PbANKA_07_v3	784901	786244	1344	785362	152	85.2569	8.08491	82.0497	●
PbANKA_07_v3	788384	788821	438	788658	87	23.4611	3.56418	21.6618
PbANKA_07_v3	789027	791642	2616	790624	153	85.5324	8.05226	82.3037	●
PbANKA_08_v3	13327	13637	311	13419	49	23.7871	5.84565	21.9831	●
PbANKA_08_v3	32802	33114	313	32989	69	15.6348	3.06168	13.9658
PbANKA_08_v3	53170	54032	863	53708	132	58.8361	5.98324	56.5159	●
PbANKA_08_v3	54322	54618	297	54542	67	15.1229	3.04462	13.4641
PbANKA_08_v3	146400	147487	1088	147067	151	89.8536	8.78029	86.1991	●
PbANKA_08_v3	176603	177280	678	177027	106	42.9902	5.29191	40.9186	●
PbANKA_08_v3	207155	207572	418	207263	67	19.3289	3.67367	17.5939
PbANKA_08_v3	211328	212105	778	211741	150	70.7935	6.46251	68.2211	●
PbANKA_08_v3	227184	227522	339	227276	90	27.8883	4.01735	26.0277
PbANKA_08_v3	227746	228020	275	227893	77	18.2426	3.19371	16.5261
PbANKA_08_v3	228364	228589	226	228460	74	16.6087	3.06094	14.9209
PbANKA_08_v3	229252	229544	293	229465	83	19.0422	3.14017	17.3122
PbANKA_08_v3	278816	279434	619	279207	75	19.8406	3.46432	18.0973
PbANKA_08_v3	291346	292165	820	291610	83	30.3604	4.65329	28.4664	●
PbANKA_08_v3	366239	366771	533	366373	110	39.5554	4.69144	37.5317	●
PbANKA_08_v3	379675	379897	223	379827	53	13.3169	3.20798	11.6954	●
PbANKA_08_v3	380482	381148	667	380677	57	15.609	3.45811	13.9405	●
PbANKA_08_v3	391991	393102	1112	392281	128	60.3535	6.37769	58.0063	●
PbANKA_08_v3	394691	395341	651	395099	113	58.3165	7.05265	56.0056	●
PbANKA_08_v3	413676	414616	941	414081	154	81.9242	7.53521	78.9363	●
PbANKA_08_v3	435360	436124	765	435504	65	18.4447	3.61225	16.7249	●
PbANKA_08_v3	441916	442552	637	442267	134	71.5361	7.48508	68.9429	●
PbANKA_08_v3	481121	482296	1176	481723	152	95.4501	9.50582	91.0687	●
PbANKA_08_v3	488059	489141	1083	488732	112	43.4273	5.07027	41.3499	●
PbANKA_08_v3	498936	499175	240	499045	68	21.3145	3.949	19.548	●
PbANKA_08_v3	533945	534208	264	534071	83	24.0792	3.76905	22.2711	●
PbANKA_08_v3	567288	567750	463	567498	105	45.0698	5.62488	42.9683	●
PbANKA_08_v3	575107	576014	908	575586	154	74.2673	6.64758	71.5913	●
PbANKA_08_v3	583194	583607	414	583368	94	38.0888	5.22933	36.086	●
PbANKA_08_v3	597636	598532	897	597961	146	73.7932	7.02229	71.1313	●
PbANKA_08_v3	645209	645947	739	645693	88	31.3077	4.55474	29.4001	●
PbANKA_08_v3	655334	656748	1415	656173	150	74.4888	6.88133	71.8045	●
PbANKA_08_v3	659848	661415	1568	660426	154	86.1878	8.06886	82.9058	●
PbANKA_08_v3	665996	667131	1136	666773	107	45.884	5.62837	43.7708	●
PbANKA_08_v3	689566	690082	517	690009	52	12.1759	3.03973	10.5795
PbANKA_08_v3	694631	695996	1366	695072	130	64.7071	6.82407	62.2728	●
PbANKA_08_v3	701983	702690	708	702380	132	69.0726	7.28239	66.5412	●
PbANKA_08_v3	707607	708080	474	707731	62	14.3013	3.06767	12.6589
PbANKA_08_v3	760719	761586	868	761200	91	33.3841	4.70827	31.4474	●
PbANKA_08_v3	767216	767691	476	767445	86	28.7973	4.29154	26.9249	●
PbANKA_08_v3	788370	789538	1169	788739	154	66.8698	5.8697	64.3882	●
PbANKA_08_v3	839353	840132	780	839762	154	86.23	8.07428	82.9404	●
PbANKA_08_v3	848072	848392	321	848242	56	14.1231	3.23821	12.4845
PbANKA_08_v3	852384	853948	1565	853264	154	80.9015	7.41151	77.9684	●
PbANKA_08_v3	857986	858551	566	858245	92	31.7983	4.44829	29.8836	●
PbANKA_08_v3	861498	862768	1271	862214	151	74.4247	6.82019	71.7429	●
PbANKA_08_v3	888551	889493	943	889025	144	65.9741	6.2187	63.5146	●
PbANKA_08_v3	904492	905361	870	904865	154	87.3642	8.22132	83.9746	●
PbANKA_08_v3	914314	915697	1384	915012	151	72.2297	6.57224	69.6176	●
PbANKA_08_v3	950009	951139	1131	950404	129	63.8493	6.77198	61.4326	●
PbANKA_08_v3	965586	966165	580	965879	143	75.7785	7.45315	73.0516	●
PbANKA_08_v3	974986	975293	308	975114	75	24.6181	4.15776	22.8026	●
PbANKA_08_v3	982503	983792	1290	982744	97	40.9143	5.47697	38.8721	●
PbANKA_08_v3	987252	988245	994	987850	154	97.4252	9.6233	92.6399	●
PbANKA_08_v3	996787	997305	519	997079	70	21.6045	3.90824	19.8336	●
PbANKA_08_v3	1014755	1015413	659	1014963	88	31.8832	4.6362	29.9675	●
PbANKA_08_v3	1031884	1032269	386	1032089	94	39.4786	5.43476	37.4559	●
PbANKA_08_v3	1033239	1033673	435	1033440	107	53.5182	6.74433	51.2867	●
PbANKA_08_v3	1042997	1043361	365	1043143	72	17.4357	3.22579	15.7334
PbANKA_08_v3	1061595	1062557	963	1061842	120	61.888	7.08698	59.5138	●
PbANKA_08_v3	1081172	1085752	4581	1081827	154	91.2007	8.73482	87.3723	●
PbANKA_08_v3	1091120	1092415	1296	1091703	154	90.2975	8.61166	86.587
PbANKA_08_v3	1099765	1101494	1730	1101130	154	85.1197	7.93241	81.923	●
PbANKA_08_v3	1107213	1107787	575	1107492	129	67.4467	7.26	64.9541	●
PbANKA_08_v3	1116682	1116962	281	1116846	89	35.5308	5.12066	33.5648	●
PbANKA_08_v3	1123777	1124643	867	1124204	153	74.0502	6.67397	71.3808	●
PbANKA_08_v3	1153862	1154160	299	1154064	57	14.929	3.33966	13.2741
PbANKA_08_v3	1158825	1159211	387	1158967	59	15.3895	3.34238	13.7249	●
PbANKA_08_v3	1159386	1160177	792	1159773	146	81.0238	7.94162	78.0843	●
PbANKA_08_v3	1190761	1191336	576	1191162	105	39.0295	4.8306	37.0131	●
PbANKA_08_v3	1210448	1211211	764	1210704	85	33.5008	5.02924	31.5628	●
PbANKA_08_v3	1235399	1235895	497	1235693	128	46.7937	4.82241	44.6667	●
PbANKA_08_v3	1249794	1250774	981	1250256	150	76.379	7.10362	73.6302	●
PbANKA_08_v3	1279439	1279970	532	1279636	78	23.9444	3.93282	22.1381	●
PbANKA_08_v3	1288665	1289758	1094	1289154	146	76.4289	7.34704	73.6791	●
PbANKA_08_v3	1290239	1290706	468	1290500	59	14.9895	3.27581	13.333	●
PbANKA_08_v3	1361598	1361774	177	1361730	21	11.5514	5.37895	9.96979	●
PbANKA_09_v3	46212	46800	589	46538	89	28.7591	4.16665	26.8871
PbANKA_09_v3	62272	63409	1138	62763	153	96.7347	9.60898	92.1597	●
PbANKA_09_v3	65188	65976	789	65610	147	73.7691	6.96249	71.108	●
PbANKA_09_v3	78968	80467	1500	79283	130	72.416	7.90147	69.7991	●
PbANKA_09_v3	81919	83315	1397	82744	154	88.5233	8.37381	85.0299	●
PbANKA_09_v3	91747	92701	955	92371	141	86.4125	9.10659	83.1058	●
PbANKA_09_v3	107205	108637	1433	107761	154	73.3876	6.55111	70.7405	●
PbANKA_09_v3	133489	134050	562	133854	69	18.8291	3.52186	17.1028
PbANKA_09_v3	136705	137161	457	137080	83	29.0274	4.45543	27.1519	●
PbANKA_09_v3	156735	156989	255	156874	70	20.2675	3.70166	18.5175
PbANKA_09_v3	158812	159626	815	159270	142	68.9402	6.66291	66.412	●
PbANKA_09_v3	180838	181707	870	181308	152	87.9221	8.43857	84.4859	●
PbANKA_09_v3	187309	188179	871	187702	152	88.8045	8.55836	85.2779	●
PbANKA_09_v3	190320	191995	1676	191292	154	86.2396	8.07552	82.9495	●
PbANKA_09_v3	216835	218042	1208	217693	154	80.9015	7.41151	77.9684	●
PbANKA_09_v3	253873	254478	606	254093	61	14.4283	3.11818	12.7837
PbANKA_09_v3	257214	257640	427	257373	77	27.7536	4.55162	25.8946	●
PbANKA_09_v3	257946	258384	439	258150	63	16.89	3.43958	15.1976
PbANKA_09_v3	267354	267789	436	267540	53	13.8866	3.31148	12.2533
PbANKA_09_v3	278742	279455	714	279121	135	75.1253	7.91771	72.4214	●
PbANKA_09_v3	302267	302632	366	302451	57	13.0355	3.02134	11.4197	●
PbANKA_09_v3	315953	316408	456	316192	75	23.0222	3.91752	21.2293	●
PbANKA_09_v3	329247	330326	1080	329661	151	90.8085	8.91507	87.0436	●
PbANKA_09_v3	333105	333888	784	333569	94	30.4669	4.19795	28.5713	●
PbANKA_09_v3	334895	335479	585	335175	64	16.7005	3.3735	15.0114
PbANKA_09_v3	336638	337580	943	337248	152	84.2364	7.9527	81.1044	●
PbANKA_09_v3	375381	376411	1031	375954	154	87.3642	8.22132	83.9746	●
PbANKA_09_v3	380001	380833	833	380333	136	57.312	5.62703	55.0178	●
PbANKA_09_v3	428100	428473	374	428284	64	17.3325	3.4731	15.6316
PbANKA_09_v3	431890	432810	921	432050	86	21.7217	3.38257	19.949	●
PbANKA_09_v3	465407	466107	701	465677	119	39.01	4.31963	36.994	●
PbANKA_09_v3	472331	473677	1347	472898	154	101.102	10.182	94.8654	●
PbANKA_09_v3	489339	489609	271	489536	71	19.6999	3.57963	17.9591
PbANKA_09_v3	540865	541136	272	540962	53	13.3982	3.22266	11.7748
PbANKA_09_v3	555262	555875	614	555587	128	54.7891	5.70037	52.5366	●
PbANKA_09_v3	564387	564899	513	564700	126	47.8281	5.00457	45.6854	●
PbANKA_09_v3	590315	590749	435	590472	55	12.7085	3.03117	11.1002
PbANKA_09_v3	590900	591784	885	591410	153	81.0251	7.4866	78.0843	●
PbANKA_09_v3	593542	594333	792	593928	154	82.9677	7.66312	79.92	●
PbANKA_09_v3	641254	642404	1151	641954	154	85.9982	8.0445	82.7325	●
PbANKA_09_v3	656763	658456	1694	657715	154	85.9982	8.0445	82.7325	●
PbANKA_09_v3	659051	659489	439	659198	84	26.5567	4.06437	24.7137	●
PbANKA_09_v3	664537	664952	416	664744	76	25.2727	4.21307	23.448	●
PbANKA_09_v3	674318	675265	948	674569	83	24.5677	3.8336	22.7525	●
PbANKA_09_v3	735425	737256	1832	736517	154	89.0983	8.4503	85.5368	●
PbANKA_09_v3	741289	741914	626	741525	92	37.9478	5.31855	35.9473	●
PbANKA_09_v3	742183	742405	223	742313	57	14.4298	3.25415	12.785
PbANKA_09_v3	748879	749239	361	749039	64	14.6287	3.05785	12.9796	●
PbANKA_09_v3	773770	774104	335	773930	101	37.566	4.81785	35.5708	●
PbANKA_09_v3	825584	825853	270	825697	61	17.6155	3.63867	15.91	●
PbANKA_09_v3	830942	831858	917	831438	148	77.7459	7.38843	74.9464	●
PbANKA_09_v3	840831	841605	775	841482	86	31.5721	4.68634	29.6608	●
PbANKA_09_v3	862461	862992	532	862714	146	77.3588	7.46441	74.5725	●
PbANKA_09_v3	896226	896725	500	896445	91	24.9482	3.62536	23.1279
PbANKA_09_v3	898827	899697	871	899013	89	27.7787	4.0392	25.9195	●
PbANKA_09_v3	937470	938026	557	937803	118	64.0361	7.5598	61.6161	●
PbANKA_09_v3	942996	943307	312	943170	61	14.1477	3.07438	12.5087
PbANKA_09_v3	958855	960168	1314	959404	153	84.1972	7.88123	81.0698	●
PbANKA_09_v3	992162	993354	1193	992801	148	68.4168	6.29752	65.9018	●
PbANKA_09_v3	996727	999063	2337	997937	149	84.1932	8.15421	81.0684	●
PbANKA_09_v3	1013492	1013883	392	1013623	52	12.6132	3.11822	11.007
PbANKA_09_v3	1014966	1016088	1123	1015512	154	82.9677	7.66312	79.92	●
PbANKA_09_v3	1064928	1065328	401	1065154	66	19.6701	3.76896	17.9295	●
PbANKA_09_v3	1073062	1075203	2142	1073970	154	93.8652	9.10656	89.6506	●
PbANKA_09_v3	1076255	1077769	1515	1077519	134	74.7866	7.94386	72.0924	●
PbANKA_09_v3	1088004	1088468	465	1088336	66	15.1478	3.07631	13.4881
PbANKA_09_v3	1111092	1111551	460	1111290	80	24.5254	3.93776	22.7111	●
PbANKA_09_v3	1133328	1133845	518	1133616	107	47.3897	5.83664	45.2538	●
PbANKA_09_v3	1186920	1187752	833	1187376	124	65.1217	7.27619	62.6813	●
PbANKA_09_v3	1204169	1204585	417	1204356	109	48.1892	5.83449	46.0406	●
PbANKA_09_v3	1229856	1230453	598	1230147	69	20.308	3.74714	18.5574	●
PbANKA_09_v3	1242463	1242748	286	1242627	65	16.2022	3.263	14.5222
PbANKA_09_v3	1244524	1245236	713	1244999	83	22.2964	3.53898	20.5149
PbANKA_09_v3	1272311	1272659	349	1272472	66	21.9514	4.14973	20.175	●
PbANKA_09_v3	1279697	1280046	350	1279849	54	12.5643	3.03968	10.9594
PbANKA_09_v3	1286571	1287203	633	1286866	150	74.4888	6.88133	71.8045	●
PbANKA_09_v3	1298555	1299177	623	1298797	81	24.2147	3.8576	22.4047
PbANKA_09_v3	1308873	1309525	653	1309220	145	78.7138	7.70425	75.8775	●
PbANKA_09_v3	1319019	1319485	467	1319157	62	14.4048	3.08354	12.7609
PbANKA_09_v3	1333522	1334943	1422	1333956	151	75.3501	6.9269	72.6382	●
PbANKA_09_v3	1364451	1365240	790	1364865	107	49.2302	6.09892	47.065	●
PbANKA_09_v3	1370906	1371221	316	1371087	79	24.0593	3.91055	22.2518
PbANKA_09_v3	1376728	1379040	2313	1377653	154	85.2297	7.94637	82.0247	●
PbANKA_09_v3	1388438	1388859	422	1388691	81	25.6328	4.05404	23.8026	●
PbANKA_09_v3	1391888	1392804	917	1392494	144	77.0515	7.55336	74.2783	●
PbANKA_09_v3	1409182	1409483	302	1409395	65	18.801	3.66959	17.0751	●
PbANKA_09_v3	1426930	1427995	1066	1427374	154	81.9242	7.53521	78.9363	●
PbANKA_09_v3	1453161	1454407	1247	1453808	154	84.7236	7.88227	81.5562	●
PbANKA_09_v3	1493903	1494236	334	1494118	94	30.4669	4.19795	28.5713
PbANKA_09_v3	1509974	1513960	3987	1511066	154	84.7236	7.88227	81.5562	●
PbANKA_09_v3	1541451	1541749	299	1541595	74	24.7437	4.22275	22.9263	●
PbANKA_09_v3	1549477	1549939	463	1549692	95	35.379	4.79807	33.415	●
PbANKA_09_v3	1570998	1572212	1215	1571667	154	77.0042	6.9548	74.233	●
PbANKA_09_v3	1581373	1581682	310	1581565	68	15.1768	3.02494	13.5164
PbANKA_09_v3	1583639	1584233	595	1583844	97	26.7708	3.66353	24.9252
PbANKA_10_v3	68063	68352	290	68200	81	21.4051	3.48578	19.6374
PbANKA_10_v3	85251	86401	1151	85784	154	87.8364	8.28317	84.4077	●
PbANKA_10_v3	139252	140201	950	139770	152	92.7475	9.11072	88.7096	●
PbANKA_10_v3	176764	177379	616	177080	150	76.7689	7.15016	74.0067	●
PbANKA_10_v3	225206	226557	1352	225996	152	87.6585	8.40303	84.2438	●
PbANKA_10_v3	245808	246002	195	245900	56	14.6298	3.32619	12.9806
PbANKA_10_v3	277985	278585	601	278259	97	35.5841	4.73535	33.6174	●
PbANKA_10_v3	306232	306605	374	306395	84	27.5584	4.20235	25.7021	●
PbANKA_10_v3	360046	360354	309	360129	105	36.1457	4.48083	34.1708	●
PbANKA_10_v3	360557	360934	378	360710	86	20.6196	3.25232	18.8642
PbANKA_10_v3	361075	361431	357	361309	69	15.8144	3.08667	14.1421
PbANKA_10_v3	405555	406123	569	405788	83	28.12	4.324	26.2562	●
PbANKA_10_v3	414422	415524	1103	415171	151	71.9606	6.54232	69.3552	●
PbANKA_10_v3	431421	432733	1313	432115	151	78.2352	7.26806	75.4155	●
PbANKA_10_v3	490081	491379	1299	490460	144	66.4287	6.26957	63.9578	●
PbANKA_10_v3	513005	513630	626	513405	85	26.702	4.04577	24.8571	●
PbANKA_10_v3	576519	576924	406	576708	86	32.2674	4.78897	30.3463	●
PbANKA_10_v3	598940	599276	337	599126	62	15.2274	3.2111	13.5663
PbANKA_10_v3	604251	604982	732	604596	133	63.6572	6.51431	61.2448	●
PbANKA_10_v3	632430	632792	363	632533	71	18.371	3.38716	16.6523
PbANKA_10_v3	658456	659283	828	658623	95	33.2616	4.51621	31.3267	●
PbANKA_10_v3	672692	673619	928	673100	151	73.5164	6.71672	70.8645	●
PbANKA_10_v3	676623	677031	409	676823	69	20.986	3.85319	19.2248
PbANKA_10_v3	685534	686167	634	686014	75	24.1378	4.08451	22.3288
PbANKA_10_v3	703323	704208	886	703806	152	68.4014	6.11182	65.8873	●
PbANKA_10_v3	705124	705534	411	705194	59	14.6038	3.21229	12.9555
PbANKA_10_v3	714469	714838	370	714706	61	13.9829	3.0488	12.347
PbANKA_10_v3	720247	720587	341	720465	56	12.8549	3.02332	11.2432
PbANKA_10_v3	728874	729189	316	729038	74	22.1926	3.83462	20.4126	●
PbANKA_10_v3	753721	754082	362	753907	59	13.8674	3.09278	12.2344
PbANKA_10_v3	755818	756181	364	756001	96	40.8124	5.51893	38.7716	●
PbANKA_10_v3	759576	759926	351	759760	78	26.7187	4.34197	24.8736	●
PbANKA_10_v3	771713	772416	704	772122	150	75.3681	6.98405	72.6558	●
PbANKA_10_v3	785586	786457	872	785924	132	61.9644	6.35955	59.5868	●
PbANKA_10_v3	788441	789404	964	788944	152	82.2061	7.69485	79.202	●
PbANKA_10_v3	791017	791731	715	791277	98	40.7471	5.39729	38.7071	●
PbANKA_10_v3	808653	809478	826	808820	69	17.7685	3.3652	16.0603
PbANKA_10_v3	837876	838768	893	838371	146	86.8713	8.75344	83.5228	●
PbANKA_10_v3	854002	854249	248	854161	56	14.2422	3.25877	12.6015	●
PbANKA_10_v3	875863	876998	1136	876541	154	84.2805	7.82651	81.1461	●
PbANKA_10_v3	883827	884243	417	884067	104	43.9875	5.52916	41.9023	●
PbANKA_10_v3	891184	891819	636	891506	74	16.8645	3.09432	15.1724
PbANKA_10_v3	897378	899383	2006	898970	154	81.9242	7.53521	78.9363	●
PbANKA_10_v3	946773	947886	1114	947439	151	76.7515	7.09099	73.99	●
PbANKA_10_v3	953312	954398	1087	954029	152	84.2279	7.95161	81.0965	●
PbANKA_10_v3	971446	971756	311	971577	88	30.7455	4.47609	28.8459	●
PbANKA_10_v3	976878	977108	231	977069	59	13.7293	3.07061	12.0987
PbANKA_10_v3	977253	977449	197	977303	87	27.4804	4.07406	25.625
PbANKA_10_v3	977671	980206	2536	979342	154	86.23	8.07428	82.9404	●
PbANKA_10_v3	996403	996900	498	996728	73	17.9722	3.26998	16.2603
PbANKA_10_v3	1054372	1055854	1483	1055207	154	73.3876	6.55111	70.7405	●
PbANKA_10_v3	1065086	1066054	969	1065534	151	77.422	7.17059	74.6341	●
PbANKA_10_v3	1080441	1081205	765	1080792	141	69.5351	6.7899	66.9909	●
PbANKA_10_v3	1095170	1095739	570	1095499	94	29.4775	4.07504	27.5957	●
PbANKA_10_v3	1116848	1118644	1797	1117629	154	91.994	8.84419	88.0595	●
PbANKA_10_v3	1138427	1138935	509	1138607	85	23.9659	3.68833	22.1593	●
PbANKA_10_v3	1143273	1144280	1008	1143758	150	86.3016	8.36607	83.0028	●
PbANKA_10_v3	1164788	1165525	738	1165108	147	81.0714	7.87903	78.1293	●
PbANKA_10_v3	1168984	1169775	792	1169599	92	34.0856	4.75945	32.1392	●
PbANKA_10_v3	1171136	1171391	256	1171277	66	16.2734	3.24157	14.592
PbANKA_10_v3	1173593	1173980	388	1173738	75	23.902	4.04884	22.0967	●
PbANKA_10_v3	1192389	1192760	372	1192584	85	31.5614	4.73392	29.6502	●
PbANKA_10_v3	1275942	1276366	425	1276226	50	12.0977	3.09738	10.5033
PbANKA_10_v3	1315674	1317322	1649	1316213	154	86.1447	8.06331	82.8678	●
PbANKA_10_v3	1323222	1324009	788	1323637	99	39.4841	5.16731	37.4614	●
PbANKA_10_v3	1326824	1327812	989	1327421	104	36.0173	4.5032	34.0442	●
PbANKA_10_v3	1355271	1355761	491	1355508	126	53.9749	5.69845	51.7351	●
PbANKA_10_v3	1394156	1395731	1576	1394703	153	86.4537	8.172	83.1386	●
PbANKA_10_v3	1405556	1405847	292	1405670	68	17.1603	3.30871	15.4626
PbANKA_10_v3	1418989	1419575	587	1419228	89	28.1163	4.0828	26.2528	●
PbANKA_10_v3	1434202	1435446	1245	1434686	154	90.9202	8.69643	87.1386	●
PbANKA_10_v3	1438137	1439315	1179	1438355	79	24.3751	3.95516	22.5627	●
PbANKA_10_v3	1483965	1486439	2475	1484484	148	84.7662	8.30392	81.5947	●
PbANKA_10_v3	1528442	1528965	524	1528736	126	63.7989	6.95386	61.3833	●
PbANKA_10_v3	1540597	1541034	438	1540809	89	35.7099	5.14776	33.7414	●
PbANKA_10_v3	1552228	1552658	431	1552514	50	12.7574	3.22152	11.1479
PbANKA_10_v3	1575234	1575571	338	1575387	86	21.3473	3.33801	19.5803
PbANKA_10_v3	1585164	1585712	549	1585469	65	14.4808	3.00773	12.8347
PbANKA_10_v3	1599218	1600257	1040	1599720	152	70.0316	6.2842	67.4767	●
PbANKA_11_v3	520	596	77	565	3	5.28463	3.61024	3.92532	●
PbANKA_11_v3	103316	103844	529	103643	74	22.8828	3.93734	21.0921	●
PbANKA_11_v3	110275	111161	887	110701	113	49.4802	5.7895	47.312	●
PbANKA_11_v3	116988	117294	307	117128	76	23.8971	4.00619	22.0919	●
PbANKA_11_v3	136198	136738	541	136686	65	17.0446	3.39189	15.3493
PbANKA_11_v3	157644	158332	689	158062	61	16.3063	3.41955	14.6244	●
PbANKA_11_v3	220995	222801	1807	222365	146	74.4573	7.10302	71.7747	●
PbANKA_11_v3	225825	227263	1439	226146	153	76.1415	6.90993	73.4029	●
PbANKA_11_v3	238207	239674	1468	238874	154	91.7346	8.80831	87.8313	●
PbANKA_11_v3	251673	253002	1330	252576	154	86.5169	8.11127	83.1987	●
PbANKA_11_v3	265734	266511	778	266114	153	72.7619	6.53178	70.1338	●
PbANKA_11_v3	269366	269817	452	269549	96	35.4342	4.76	33.4695	●
PbANKA_11_v3	274441	275263	823	274882	150	87.6647	8.55273	84.2492	●
PbANKA_11_v3	278343	278735	393	278618	59	14.7816	3.24148	13.1295	●
PbANKA_11_v3	286272	286693	422	286438	64	14.9981	3.11296	13.3413
PbANKA_11_v3	291760	292141	382	291909	85	32.0444	4.80632	30.1263	●
PbANKA_11_v3	306179	308521	2343	307546	154	91.725	8.80699	87.8254	●
PbANKA_11_v3	340307	340762	456	340578	62	15.9441	3.32444	14.2689	●
PbANKA_11_v3	365972	367324	1353	366740	152	90.4423	8.7844	86.721	●
PbANKA_11_v3	387890	388836	947	388511	105	42.6096	5.29088	40.5438	●
PbANKA_11_v3	401925	402934	1010	402300	148	70.1121	6.48575	67.5551	●
PbANKA_11_v3	407766	408407	642	408094	143	74.129	7.24221	71.4574	●
PbANKA_11_v3	414018	414671	654	414299	111	32.5002	3.88752	30.5759	●
PbANKA_11_v3	418129	418615	487	418262	82	27.1947	4.23449	25.3432	●
PbANKA_11_v3	462451	463705	1255	462983	154	89.9256	8.56136	86.2632	●
PbANKA_11_v3	472053	472434	382	472318	71	20.0227	3.62731	18.2765	●
PbANKA_11_v3	492469	493114	646	492821	100	40.2776	5.22612	38.2439	●
PbANKA_11_v3	499666	500715	1050	500299	154	84.0326	7.79544	80.9143	●
PbANKA_11_v3	520370	522101	1732	521527	154	94.8104	9.24149	90.4926	●
PbANKA_11_v3	525255	525583	329	525433	61	17.2133	3.57053	15.5148	●
PbANKA_11_v3	542241	542564	324	542340	78	20.684	3.48353	18.9276	●
PbANKA_11_v3	544055	545300	1246	544655	154	88.608	8.38504	85.1035	●
PbANKA_11_v3	546254	546931	678	546602	80	21.0789	3.47389	19.3161
PbANKA_11_v3	552489	552865	377	552685	93	38.7156	5.37736	36.7042	●
PbANKA_11_v3	561298	562327	1030	561952	154	84.8076	7.89289	81.6342	●
PbANKA_11_v3	572792	573173	382	573003	59	17.404	3.68899	15.7024
PbANKA_11_v3	582064	583113	1050	582789	118	62.9375	7.38977	60.5398	●
PbANKA_11_v3	589630	591105	1476	590148	123	58.7731	6.45943	56.4542	●
PbANKA_11_v3	595144	595841	698	595478	122	43.7895	4.71925	41.7069	●
PbANKA_11_v3	597356	597879	524	597683	101	38.0252	4.87725	36.0233	●
PbANKA_11_v3	598107	598784	678	598560	84	28.8689	4.38742	26.9954
PbANKA_11_v3	614336	615224	889	614822	153	83.9708	7.85253	80.8623	●
PbANKA_11_v3	626740	628149	1410	627216	153	77.4628	7.06236	74.6729	●
PbANKA_11_v3	635100	635985	886	635508	131	56.3923	5.74688	54.1138	●
PbANKA_11_v3	641761	642117	357	641978	56	13.3147	3.10038	11.6934
PbANKA_11_v3	642474	648155	5682	646303	154	86.1706	8.06664	82.8903	●
PbANKA_11_v3	664154	664927	774	664568	112	38.6513	4.51396	36.6405	●
PbANKA_11_v3	685484	685790	307	685659	65	16.7553	3.34732	15.0649
PbANKA_11_v3	737954	738685	732	738296	137	69.1173	6.97091	66.5853	●
PbANKA_11_v3	739833	740413	581	740128	142	75.2509	7.44918	72.5423	●
PbANKA_11_v3	744206	744867	662	744677	88	19.6018	3.08919	17.8625
PbANKA_11_v3	752205	753893	1689	753220	154	93.2703	9.02248	89.1515	●
PbANKA_11_v3	758194	759939	1746	759306	154	87.3642	8.22132	83.9746	●
PbANKA_11_v3	765285	765668	384	765496	81	22.3429	3.6074	20.5605	●
PbANKA_11_v3	773547	774737	1191	774090	154	84.976	7.91419	81.7923	●
PbANKA_11_v3	832774	833314	541	833098	100	30.8332	4.0346	28.9325
PbANKA_11_v3	859192	860159	968	859680	154	81.9242	7.53521	78.9363	●
PbANKA_11_v3	868219	869008	790	868680	149	74.503	6.9378	71.8183	●
PbANKA_11_v3	895720	896619	900	896193	147	82.7574	8.10372	79.7243	●
PbANKA_11_v3	905520	906743	1224	906000	148	67.5916	6.20744	65.0958	●
PbANKA_11_v3	927985	928678	694	928311	122	53.0964	5.78639	50.8706	●
PbANKA_11_v3	961232	961443	212	961329	62	14.8032	3.14499	13.1507
PbANKA_11_v3	969979	970306	328	970054	66	19.1124	3.67923	17.3811
PbANKA_11_v3	970386	971549	1164	971157	148	87.385	8.66788	83.9939	●
PbANKA_11_v3	1006300	1006793	494	1006475	68	23.414	4.29894	21.6155	●
PbANKA_11_v3	1036418	1036563	146	1036490	91	28.5486	4.06538	26.6796	●
PbANKA_11_v3	1082840	1083148	309	1082986	56	15.6005	3.49829	13.9321	●
PbANKA_11_v3	1088463	1089014	552	1088849	92	26.3914	3.76669	24.5508
PbANKA_11_v3	1092904	1094667	1764	1093875	154	94.0649	9.13494	89.8231	●
PbANKA_11_v3	1097657	1098609	953	1098254	151	91.1111	8.95813	87.3008	●
PbANKA_11_v3	1139698	1140338	641	1140003	134	57.2315	5.70581	54.9387	●
PbANKA_11_v3	1154232	1154425	194	1154388	54	12.6134	3.04814	11.0072
PbANKA_11_v3	1154504	1155663	1160	1154766	151	80.2557	7.5148	77.3539	●
PbANKA_11_v3	1156268	1157328	1061	1156929	148	83.1096	8.08011	80.0541	●
PbANKA_11_v3	1161308	1161986	679	1161488	87	28.97	4.27399	27.0955	●
PbANKA_11_v3	1178611	1179423	813	1179012	154	78.9155	7.17589	76.0705	●
PbANKA_11_v3	1191540	1193211	1672	1192106	154	80.9015	7.41151	77.9684	●
PbANKA_11_v3	1193873	1194249	377	1193989	75	22.4877	3.83905	20.7031	●
PbANKA_11_v3	1204032	1204543	512	1204294	77	19.7049	3.3842	17.964
PbANKA_11_v3	1229346	1229649	304	1229509	59	15.9661	3.43964	14.2907
PbANKA_11_v3	1230685	1231347	663	1231005	136	77.3153	8.158	74.532	●
PbANKA_11_v3	1298315	1298650	336	1298472	66	19.009	3.66274	17.2797
PbANKA_11_v3	1298839	1299396	558	1299033	102	44.2001	5.6697	42.1115	●
PbANKA_11_v3	1305854	1306705	852	1306422	110	52.502	6.38656	50.2862
PbANKA_11_v3	1309886	1310438	553	1310154	97	32.4257	4.33051	30.5024	●
PbANKA_11_v3	1313239	1314711	1473	1314255	153	67.6205	5.98753	65.1233	●
PbANKA_11_v3	1332639	1333661	1023	1333209	144	67.6464	6.40739	65.1477	●
PbANKA_11_v3	1343329	1345678	2350	1344843	154	89.0071	8.43814	85.4589	●
PbANKA_11_v3	1359267	1359826	560	1359582	99	36.62	4.78311	34.6382	●
PbANKA_11_v3	1377660	1377990	331	1377860	86	36.7762	5.49278	34.7922	●
PbANKA_11_v3	1416902	1418074	1173	1417571	153	80.0099	7.36369	77.1192	●
PbANKA_11_v3	1420779	1421105	327	1421006	54	12.4937	3.02751	10.8901	●
PbANKA_11_v3	1423547	1423834	288	1423699	69	16.6371	3.2024	14.949
PbANKA_11_v3	1446399	1447170	772	1446957	117	42.0742	4.71369	40.0154	●
PbANKA_11_v3	1458846	1460070	1225	1459401	154	91.9362	8.83619	88.0136	●
PbANKA_11_v3	1485436	1485795	360	1485669	91	22.9638	3.39565	21.1718	●
PbANKA_11_v3	1558487	1560108	1622	1559382	154	91.0775	8.71794	87.2755	●
PbANKA_11_v3	1561162	1562055	894	1561720	135	72.0869	7.49221	69.4787	●
PbANKA_11_v3	1582982	1583352	371	1583207	75	24.7855	4.18347	22.9675	●
PbANKA_11_v3	1586874	1587450	577	1587231	130	60.3172	6.26392	57.9715	●
PbANKA_11_v3	1594812	1595666	855	1595398	100	39.2024	5.07961	37.1838	●
PbANKA_11_v3	1595961	1596428	468	1596187	77	26.3672	4.33488	24.5271	●
PbANKA_11_v3	1610397	1611606	1210	1610897	154	89.9256	8.56136	86.2632	●
PbANKA_11_v3	1614894	1615542	649	1615090	80	27.7101	4.39885	25.8517	●
PbANKA_11_v3	1628058	1628658	601	1628372	126	59.2392	6.34744	56.9134	●
PbANKA_11_v3	1638129	1638711	583	1638425	94	39.6092	5.45436	37.5848	●
PbANKA_11_v3	1649764	1650343	580	1650000	119	58.3736	6.65048	56.0622	●
PbANKA_11_v3	1682942	1683186	245	1683080	64	17.574	3.5116	15.8691	●
PbANKA_11_v3	1685223	1685788	566	1685538	137	64.4029	6.38886	61.9753	●
PbANKA_11_v3	1709469	1709856	388	1709674	95	30.1507	4.12261	28.2598
PbANKA_11_v3	1711524	1711874	351	1711697	77	20.7467	3.52364	18.9891
PbANKA_11_v3	1711982	1712366	385	1712175	80	22.4245	3.65088	20.6407
PbANKA_12_v3	76462	76928	467	76708	106	40.3595	4.95368	38.3246	●
PbANKA_12_v3	101227	101627	401	101428	68	20.9248	3.88609	19.1645	●
PbANKA_12_v3	105654	106741	1088	106134	146	71.0726	6.69904	68.4907	●
PbANKA_12_v3	113417	114310	894	113703	104	40.3914	5.0478	38.3562	●
PbANKA_12_v3	138614	141048	2435	139637	154	78.7822	7.1603	75.9429	●
PbANKA_12_v3	164385	164932	548	164745	82	31.0914	4.81657	29.1869	●
PbANKA_12_v3	172944	174466	1523	173322	134	71.1438	7.43116	68.5599	●
PbANKA_12_v3	178294	178729	436	178468	62	16.2645	3.37577	14.5832
PbANKA_12_v3	190017	190789	773	190324	135	70.047	7.21683	67.4917	●
PbANKA_12_v3	191561	191949	389	191796	65	14.5611	3.0194	12.9137
PbANKA_12_v3	193521	194664	1144	194338	102	34.6807	4.4182	32.7265	●
PbANKA_12_v3	226488	227813	1326	227251	154	79.8988	7.2918	77.0144	●
PbANKA_12_v3	238227	238745	519	238486	104	43.8764	5.5138	41.7927	●
PbANKA_12_v3	242303	243045	743	242659	72	21.4515	3.80273	19.683	●
PbANKA_12_v3	244938	245517	580	245303	111	40.2503	4.73371	38.2171	●
PbANKA_12_v3	285167	286751	1585	286111	138	57.4054	5.55257	55.1098	●
PbANKA_12_v3	295072	296448	1377	295642	154	90.5781	8.64977	86.8416	●
PbANKA_12_v3	307195	307777	583	307508	133	64.0123	6.55865	61.5925	●
PbANKA_12_v3	313108	314176	1069	313654	151	90.0068	8.8018	86.3318	●
PbANKA_12_v3	328934	329838	905	329375	151	66.0333	5.90977	63.5708	●
PbANKA_12_v3	359062	360175	1114	359323	69	22.7031	4.12996	20.9152
PbANKA_12_v3	371656	372299	644	371943	70	19.3975	3.57081	17.6613	●
PbANKA_12_v3	395303	396118	816	395796	80	26.7506	4.25646	24.9053	●
PbANKA_12_v3	403698	405689	1992	404590	154	63.2084	5.51141	60.8058	●
PbANKA_12_v3	416202	416752	551	416573	74	25.0059	4.26401	23.1846	●
PbANKA_12_v3	425656	425774	119	425701	54	12.6496	3.0544	11.0428
PbANKA_12_v3	433682	433911	230	433768	57	14.3834	3.24627	12.7399
PbANKA_12_v3	435729	436166	438	435931	101	40.6014	5.22004	38.5632	●
PbANKA_12_v3	442707	443747	1041	443429	96	33.9096	4.55891	31.9657	●
PbANKA_12_v3	449306	450531	1226	449944	152	84.3714	7.9701	81.2268	●
PbANKA_12_v3	461495	461819	325	461619	61	18.3244	3.76061	16.6066	●
PbANKA_12_v3	505103	505505	403	505314	61	14.1996	3.08246	12.5597
PbANKA_12_v3	531908	532179	272	532076	62	17.504	3.57854	15.8003	●
PbANKA_12_v3	536948	537180	233	537034	78	20.623	3.47542	18.8675
PbANKA_12_v3	540129	540765	637	540415	95	33.6624	4.56868	31.722	●
PbANKA_12_v3	553819	554637	819	554234	154	88.3825	8.35517	84.9062	●
PbANKA_12_v3	558441	561614	3174	560360	153	77.2426	7.03676	74.4621	●
PbANKA_12_v3	586036	586704	669	586292	122	46.0698	4.96635	43.954	●
PbANKA_12_v3	587838	588457	620	588134	97	35.4016	4.71128	33.4375	●
PbANKA_12_v3	673077	673523	447	673348	76	19.2358	3.3517	17.5023
PbANKA_12_v3	678741	682524	3784	679955	154	80.9015	7.41151	77.9684	●
PbANKA_12_v3	684358	685170	813	684910	72	19.3024	3.48726	17.568
PbANKA_12_v3	707693	709043	1351	708196	154	88.9798	8.4345	85.4362	●
PbANKA_12_v3	710928	711975	1048	711695	72	17.7966	3.27549	16.0877
PbANKA_12_v3	712832	713980	1149	713297	74	19.6102	3.46466	17.8706	●
PbANKA_12_v3	714618	715981	1364	715545	151	76.2932	7.03701	73.5478	●
PbANKA_12_v3	735898	736353	456	736002	67	18.7764	3.58728	17.0508	●
PbANKA_12_v3	743357	744589	1233	744302	118	54.0889	6.12567	51.8477	●
PbANKA_12_v3	770657	771163	507	770962	60	13.6348	3.02479	12.0065
PbANKA_12_v3	782926	783556	631	783267	139	64.2518	6.26833	61.8288	●
PbANKA_12_v3	790870	791672	803	791211	138	74.707	7.64412	72.0159	●
PbANKA_12_v3	831927	832570	644	832372	86	28.3162	4.22542	26.4502	●
PbANKA_12_v3	860036	860574	539	860230	108	51.2745	6.33509	49.0795	●
PbANKA_12_v3	871528	872098	571	871813	109	36.1128	4.33467	34.1387	●
PbANKA_12_v3	876653	877365	713	876927	91	29.5435	4.1926	27.6608	●
PbANKA_12_v3	878903	881843	2941	880822	154	77.9508	7.06362	75.1445	●
PbANKA_12_v3	930389	930630	242	930560	80	29.8012	4.72006	27.9151	●
PbANKA_12_v3	939295	940502	1208	940216	152	88.2604	8.48434	84.794	●
PbANKA_12_v3	942879	943355	477	943040	70	17.818	3.34011	16.1085	●
PbANKA_12_v3	949339	949941	603	949687	126	55.488	5.8796	53.2249	●
PbANKA_12_v3	960514	961085	572	960859	76	27.6403	4.58513	25.7828	●
PbANKA_12_v3	973478	974813	1336	974401	153	81.0251	7.4866	78.0843	●
PbANKA_12_v3	982116	982586	471	982311	75	25.3854	4.27651	23.559	●
PbANKA_12_v3	1030821	1031415	595	1031066	88	27.1439	3.9934	25.2933	●
PbANKA_12_v3	1039725	1040400	676	1040007	93	31.9124	4.42212	29.996	●
PbANKA_12_v3	1046524	1047051	528	1046810	119	59.3372	6.78671	57.0101	●
PbANKA_12_v3	1048872	1050088	1217	1049348	152	64.5568	5.7196	62.1255	●
PbANKA_12_v3	1051876	1052340	465	1052141	69	21.4538	3.92742	19.6852	●
PbANKA_12_v3	1074556	1074975	420	1074729	113	44.1569	5.11514	42.069	●
PbANKA_12_v3	1086212	1087562	1351	1086793	153	81.0251	7.4866	78.0843	●
PbANKA_12_v3	1102144	1104049	1906	1102729	153	94.2423	9.24306	89.988	●
PbANKA_12_v3	1137689	1138310	622	1137959	84	22.6821	3.55734	20.8944
PbANKA_12_v3	1153861	1154863	1003	1154351	147	84.2265	8.30368	81.0958	●
PbANKA_12_v3	1206010	1207284	1275	1206895	154	81.9242	7.53521	78.9363	●
PbANKA_12_v3	1219969	1221333	1365	1220518	154	97.1523	9.58286	92.4255	●
PbANKA_12_v3	1228561	1231189	2629	1230123	154	84.3972	7.84116	81.2507	●
PbANKA_12_v3	1243594	1244573	980	1244164	154	71.8114	6.38101	69.2106	●
PbANKA_12_v3	1250714	1251427	714	1251136	153	92.4465	8.98654	88.4493	●
PbANKA_12_v3	1253381	1254220	840	1253766	136	76.355	8.01913	73.6084	●
PbANKA_12_v3	1256653	1257061	409	1256817	66	15.6729	3.15285	14.003
PbANKA_12_v3	1282313	1282773	461	1282564	66	14.9887	3.05331	13.3322
PbANKA_12_v3	1293482	1297255	3774	1296568	153	96.873	9.62963	92.2369	●
PbANKA_12_v3	1304626	1306771	2146	1306368	151	66.0333	5.90977	63.5708	●
PbANKA_12_v3	1323233	1323542	310	1323448	72	17.69	3.26077	15.9828
PbANKA_12_v3	1338440	1339802	1363	1339326	152	80.1288	7.43798	77.2325	●
PbANKA_12_v3	1361503	1361825	323	1361664	68	21.8756	4.04071	20.1006	●
PbANKA_12_v3	1395473	1396535	1063	1395982	153	91.5499	8.86064	87.6728	●
PbANKA_12_v3	1433546	1434084	539	1433883	136	58.0456	5.70751	55.7388	●
PbANKA_12_v3	1443110	1444653	1544	1444304	113	54.4422	6.47545	52.1968	●
PbANKA_12_v3	1474875	1475196	322	1475037	76	26.4377	4.39356	24.5965	●
PbANKA_12_v3	1488409	1489121	713	1488846	97	34.9505	4.65215	32.9924	●
PbANKA_12_v3	1493389	1494391	1003	1493550	98	40.4237	5.35102	38.388	●
PbANKA_12_v3	1498354	1499871	1518	1498924	154	90.1205	8.58769	86.4276	●
PbANKA_12_v3	1500182	1501167	986	1500791	126	64.7601	7.08723	62.325
PbANKA_12_v3	1511625	1512409	785	1512136	136	62.7407	6.24333	60.3487	●
PbANKA_12_v3	1522475	1523098	624	1522849	76	17.7943	3.16264	16.0856
PbANKA_12_v3	1523637	1524583	947	1524439	77	23.0921	3.8496	21.2983	●
PbANKA_12_v3	1562232	1564007	1776	1562968	154	78.9155	7.17589	76.0705	●
PbANKA_12_v3	1607778	1608105	328	1607975	82	24.5884	3.87206	22.7731	●
PbANKA_12_v3	1608759	1609035	277	1608948	88	26.6072	3.92448	24.7637
PbANKA_12_v3	1620471	1621057	587	1620765	133	54.3123	5.42727	52.0679	●
PbANKA_12_v3	1624353	1624800	448	1624499	53	13.5655	3.25294	11.9386
PbANKA_12_v3	1635959	1637115	1157	1636666	154	83.4793	7.72646	80.3975	●
PbANKA_12_v3	1638205	1639302	1098	1638802	153	89.0601	8.51856	85.5038	●
PbANKA_12_v3	1656417	1656949	533	1656837	153	68.4079	6.06854	65.8933	●
PbANKA_12_v3	1668756	1669430	675	1668921	67	18.4006	3.5292	16.6815
PbANKA_12_v3	1673163	1673556	394	1673366	93	33.1251	4.58305	31.1921	●
PbANKA_12_v3	1700982	1701861	880	1701382	154	78.9155	7.17589	76.0705	●
PbANKA_12_v3	1724784	1726417	1634	1725402	154	93.3592	9.03499	89.2326	●
PbANKA_12_v3	1742220	1743963	1744	1742490	92	30.7128	4.30554	28.8138
PbANKA_13_v3	47328	47737	410	47555	98	41.831	5.55449	39.7759	●
PbANKA_13_v3	57670	59013	1344	58131	154	85.1197	7.93241	81.923	●
PbANKA_13_v3	89568	91993	2426	91334	154	87.3752	8.22276	83.9849	●
PbANKA_13_v3	139173	139422	250	139272	77	18.3205	3.20371	16.6028
PbANKA_13_v3	166008	168498	2491	167028	154	79.5357	7.24883	76.6656	●
PbANKA_13_v3	193271	193666	396	193478	98	41.7784	5.54679	39.7242	●
PbANKA_13_v3	195382	196017	636	195657	112	48.8688	5.76192	46.7105	●
PbANKA_13_v3	204000	204391	392	204244	98	31.0296	4.12441	29.1259	●
PbANKA_13_v3	220965	221322	358	221130	82	30.2535	4.68713	28.361	●
PbANKA_13_v3	247938	248636	699	248277	144	83.454	8.42224	80.3743	●
PbANKA_13_v3	280636	281377	742	280945	119	55.4582	6.25106	53.1962	●
PbANKA_13_v3	437657	439265	1609	438697	107	37.8932	4.61176	35.8934	●
PbANKA_13_v3	456945	457843	899	457160	107	35.5699	4.34216	33.6033
PbANKA_13_v3	482008	482120	113	482072	54	12.6315	3.05127	11.0251
PbANKA_13_v3	488882	489248	367	489068	94	35.6643	4.88426	33.6964	●
PbANKA_13_v3	498512	499178	667	498875	145	75.9035	7.3428	73.1719	●
PbANKA_13_v3	530105	530412	308	530287	62	14.2688	3.0627	12.6271
PbANKA_13_v3	534927	535952	1026	535302	153	80.0099	7.36369	77.1192	●
PbANKA_13_v3	541460	541884	425	541684	90	30.8348	4.40273	28.9342	●
PbANKA_13_v3	548232	550707	2476	548967	154	91.5051	8.77666	87.6316	●
PbANKA_13_v3	555174	555665	492	555437	69	20.233	3.73551	18.4838	●
PbANKA_13_v3	560769	561732	964	561203	146	77.9222	7.53624	75.1171	●
PbANKA_13_v3	576072	576826	755	576349	83	30.1643	4.62383	28.2733	●
PbANKA_13_v3	584777	585406	630	585048	127	59.1553	6.28123	56.8304	●
PbANKA_13_v3	587062	588926	1865	588033	154	85.1197	7.93241	81.923	●
PbANKA_13_v3	624541	625135	595	624896	89	27.7715	4.03827	25.9123	●
PbANKA_13_v3	648903	650066	1164	649455	153	88.6289	8.46041	85.1231	●
PbANKA_13_v3	652563	653310	748	652931	139	73.4514	7.40831	70.8025	●
PbANKA_13_v3	722771	723045	275	722957	65	22.2274	4.24921	20.4467	●
PbANKA_13_v3	726372	727954	1583	727043	154	86.23	8.07428	82.9404	●
PbANKA_13_v3	758057	758469	413	758274	88	23.6284	3.55524	21.8267	●
PbANKA_13_v3	767024	767796	773	767488	111	56.4937	6.9176	54.2134	●
PbANKA_13_v3	768708	771566	2859	770444	154	100.312	10.0597	94.8654	●
PbANKA_13_v3	774409	775199	791	774913	133	67.3002	6.98035	64.81	●
PbANKA_13_v3	776112	776898	787	776604	137	72.9182	7.46967	70.2841	●
PbANKA_13_v3	780308	780992	685	780688	149	81.6047	7.81382	78.6325	●
PbANKA_13_v3	784494	784823	330	784630	73	25.4367	4.38168	23.6098	●
PbANKA_13_v3	805367	806547	1181	805992	151	93.9254	9.36676	89.7007	●
PbANKA_13_v3	830123	831877	1755	831003	154	86.691	8.13378	83.3559	●
PbANKA_13_v3	852871	853413	543	853246	86	28.6761	4.27482	26.8052	●
PbANKA_13_v3	856163	857187	1025	856551	146	69.3089	6.49577	66.7711	●
PbANKA_13_v3	865166	865791	626	865387	116	41.9658	4.73874	39.9088	●
PbANKA_13_v3	935905	936350	446	936146	108	46.6624	5.68048	44.5376	●
PbANKA_13_v3	976730	976893	164	976821	72	21.9205	3.87374	20.1447	●
PbANKA_13_v3	988213	988558	346	988412	70	21.1558	3.83815	19.3919	●
PbANKA_13_v3	994466	994839	374	994623	90	30.8348	4.40273	28.9342	●
PbANKA_13_v3	998603	999406	804	998958	152	92.4491	9.06793	88.4514	●
PbANKA_13_v3	1003408	1004759	1352	1004106	153	85.2993	8.02219	82.0866	●
PbANKA_13_v3	1037210	1037870	661	1037510	86	22.4926	3.47535	20.7078	●
PbANKA_13_v3	1046642	1047718	1077	1046943	150	63.0107	5.64483	60.6113	●
PbANKA_13_v3	1109507	1109922	416	1109671	85	26.3394	3.99722	24.4997
PbANKA_13_v3	1124750	1125852	1103	1125249	154	90.0091	8.57262	86.3337	●
PbANKA_13_v3	1134552	1134950	399	1134734	98	30.5398	4.06625	28.6433	●
PbANKA_13_v3	1135681	1136379	699	1136037	100	28.109	3.72784	26.2455
PbANKA_13_v3	1149239	1149872	634	1149573	138	67.9738	6.76834	65.4673	●
PbANKA_13_v3	1161100	1162338	1239	1161533	154	82.8277	7.64585	79.7909	●
PbANKA_13_v3	1189249	1189806	558	1189510	106	47.7847	5.95094	45.6427	●
PbANKA_13_v3	1205377	1205859	483	1205602	73	17.6124	3.22111	15.907	●
PbANKA_13_v3	1218380	1218957	578	1218632	70	17.818	3.34011	16.1085
PbANKA_13_v3	1220100	1221019	920	1220562	153	79.0147	7.24475	76.1654	●
PbANKA_13_v3	1244348	1245376	1029	1244969	147	83.724	8.23484	80.6278	●
PbANKA_13_v3	1251535	1252259	725	1252008	67	16.9214	3.30577	15.2279	●
PbANKA_13_v3	1258899	1260007	1109	1259740	122	64.2696	7.29448	61.8464	●
PbANKA_13_v3	1299443	1300476	1034	1300195	134	63.6247	6.45518	61.2131	●
PbANKA_13_v3	1308219	1308725	507	1308449	80	27.6554	4.39065	25.7978	●
PbANKA_13_v3	1325021	1325416	396	1325142	88	35.6446	5.19352	33.677	●
PbANKA_13_v3	1353601	1354311	711	1353916	120	56.9576	6.39395	54.6719	●
PbANKA_13_v3	1389459	1390979	1521	1390185	153	79.0147	7.24475	76.1654	●
PbANKA_13_v3	1396841	1398126	1286	1397532	154	100.312	10.0597	94.8654	●
PbANKA_13_v3	1424012	1424304	293	1424153	52	12.5142	3.10037	10.9103	●
PbANKA_13_v3	1430412	1431388	977	1430780	136	71.9152	7.40137	69.3112	●
PbANKA_13_v3	1446403	1446737	335	1446485	56	12.8123	3.01624	11.2019
PbANKA_13_v3	1456784	1457248	465	1456929	78	24.6973	4.04132	22.8806	●
PbANKA_13_v3	1459989	1460899	911	1460510	151	79.5677	7.43005	76.6964	●
PbANKA_13_v3	1488379	1488791	413	1488689	57	15.9195	3.51292	14.2447	●
PbANKA_13_v3	1501258	1503745	2488	1502664	154	83.4793	7.72646	80.3975	●
PbANKA_13_v3	1519238	1519555	318	1519415	80	21.8849	3.5793	20.1096	●
PbANKA_13_v3	1522539	1524132	1594	1523516	143	70.3303	6.77431	67.767	●
PbANKA_13_v3	1562968	1563195	228	1563085	59	14.5789	3.2082	12.9312
PbANKA_13_v3	1619433	1619895	463	1619694	105	45.4127	5.67263	43.3067	●
PbANKA_13_v3	1652229	1652607	379	1652483	77	20.9748	3.55459	19.2138	●
PbANKA_13_v3	1666581	1667779	1199	1667312	153	77.0811	7.01804	74.3063	●
PbANKA_13_v3	1684272	1685138	867	1684780	150	79.3573	7.46536	76.4932	●
PbANKA_13_v3	1725001	1726630	1630	1725754	143	65.1609	6.17581	62.7196	●
PbANKA_13_v3	1729297	1729546	250	1729359	61	13.7581	3.01408	12.127
PbANKA_13_v3	1737607	1737897	291	1737718	78	19.2139	3.29119	17.481
PbANKA_13_v3	1745606	1745884	279	1745809	61	14.4283	3.11818	12.7837	●
PbANKA_13_v3	1767916	1768436	521	1768293	64	16.2055	3.29661	14.5254
PbANKA_13_v3	1768559	1769167	609	1768780	135	67.153	6.83987	64.6653	●
PbANKA_13_v3	1771530	1772169	640	1772006	68	19.1834	3.61232	17.4511
PbANKA_13_v3	1786007	1786560	554	1786250	113	41.6516	4.81824	39.5991	●
PbANKA_13_v3	1788942	1789885	944	1789330	74	19.6644	3.47221	17.9239
PbANKA_13_v3	1790312	1791214	903	1790903	135	67.7478	6.91606	65.2466	●
PbANKA_13_v3	1797690	1798518	829	1798213	129	55.9847	5.79316	53.7141	●
PbANKA_13_v3	1810537	1811431	895	1811006	140	66.0369	6.42561	63.5739	●
PbANKA_13_v3	1812598	1813311	714	1812963	150	84.7506	8.15772	81.5799	●
PbANKA_13_v3	1817254	1818503	1250	1818116	153	91.0406	8.78978	87.2457	●
PbANKA_13_v3	1822634	1823789	1156	1823122	112	38.1027	4.45289	36.0997
PbANKA_13_v3	1824805	1825943	1139	1825318	154	84.0326	7.79544	80.9143	●
PbANKA_13_v3	1852387	1853045	659	1852798	97	40.3478	5.39447	38.3133	●
PbANKA_13_v3	1869735	1870073	339	1869914	59	14.7686	3.23934	13.1171	●
PbANKA_13_v3	1879598	1881333	1736	1880187	154	89.8331	8.54887	86.1816
PbANKA_13_v3	1895969	1896316	348	1896142	108	48.1848	5.89068	46.0365	●
PbANKA_13_v3	1932497	1932713	217	1932643	69	15.8614	3.09322	14.1877
PbANKA_13_v3	1942548	1943484	937	1943099	152	77.1645	7.0833	74.3863	●
PbANKA_13_v3	1955069	1957254	2186	1956655	141	75.1685	7.50364	72.4624
PbANKA_13_v3	1957334	1961227	3894	1958854	153	83.118	7.74515	80.0598
PbANKA_13_v3	1977570	1978646	1077	1978108	146	74.5316	7.11211	71.8463	●
PbANKA_13_v3	1993452	1994641	1190	1993912	151	91.8704	9.06691	87.9529	●
PbANKA_13_v3	1998312	1999715	1404	1998978	154	88.5233	8.37381	85.0299	●
PbANKA_13_v3	2003628	2004868	1241	2003913	86	20.6196	3.25232	18.8642	●
PbANKA_13_v3	2005264	2007372	2109	2006479	154	71.674	6.36635	69.0776	●
PbANKA_13_v3	2010289	2011775	1487	2010964	147	77.9644	7.47804	75.1568	●
PbANKA_13_v3	2012381	2013006	626	2012667	70	19.0904	3.52528	17.3596
PbANKA_13_v3	2035488	2035770	283	2035606	63	18.0956	3.63589	16.3816
PbANKA_13_v3	2038551	2039711	1161	2039279	149	91.2321	9.14076	87.3992	●
PbANKA_13_v3	2043250	2044177	928	2043717	152	91.9846	9.00164	88.0542	●
PbANKA_13_v3	2048493	2048972	480	2048845	72	18.5435	3.37961	16.8218
PbANKA_13_v3	2055324	2057609	2286	2056719	154	72.7302	6.47974	70.1025	●
PbANKA_13_v3	2059036	2060039	1004	2059421	143	76.9762	7.60933	74.2066	●
PbANKA_13_v3	2078585	2078902	318	2078752	77	17.2974	3.07368	15.5972
PbANKA_13_v3	2090978	2092339	1362	2091530	153	77.0962	7.0198	74.3212	●
PbANKA_13_v3	2128981	2129584	604	2129273	81	23.7705	3.79731	21.9668
PbANKA_13_v3	2144630	2145088	459	2144858	108	40.5471	4.89079	38.5095	●
PbANKA_13_v3	2189936	2190389	454	2190183	118	53.0193	5.98489	50.796	●
PbANKA_13_v3	2209557	2210683	1127	2210174	154	96.6464	9.50826	92.1188	●
PbANKA_13_v3	2211991	2212287	297	2212110	75	27.0877	4.5478	25.2378	●
PbANKA_13_v3	2213668	2214253	586	2213967	115	42.458	4.83264	40.3942	●
PbANKA_13_v3	2233186	2233871	686	2233534	149	81.6307	7.81718	78.6569	●
PbANKA_13_v3	2244991	2246193	1203	2245588	154	72.5233	6.45741	69.9033	●
PbANKA_13_v3	2274532	2275562	1031	2275014	149	77.4568	7.29214	74.6671	●
PbANKA_13_v3	2276916	2277705	790	2277081	53	13.3141	3.20748	11.6928	●
PbANKA_13_v3	2279749	2280697	949	2280420	107	49.7766	6.17846	47.6037	●
PbANKA_13_v3	2281322	2282919	1598	2282371	150	73.5705	6.77532	70.9168	●
PbANKA_13_v3	2297034	2299891	2858	2299238	154	84.4473	7.84746	81.2964	●
PbANKA_13_v3	2308567	2309276	710	2308901	152	90.4997	8.7924	86.7701	●
PbANKA_13_v3	2342615	2344194	1580	2343524	154	75.163	6.74692	72.4571	●
PbANKA_13_v3	2363153	2363830	678	2363372	71	22.0547	3.93608	20.2769	●
PbANKA_13_v3	2369573	2370291	719	2369934	87	24.7193	3.71934	22.9022	●
PbANKA_13_v3	2375157	2375504	348	2375328	63	15.0053	3.1447	13.3485
PbANKA_13_v3	2385912	2386456	545	2386017	64	14.3001	3.00925	12.6578
PbANKA_13_v3	2394674	2395495	822	2395145	152	84.3714	7.9701	81.2268	●
PbANKA_13_v3	2402184	2402901	718	2402646	55	12.5761	3.00878	10.9707
PbANKA_13_v3	2413266	2414174	909	2413711	144	84.9359	8.63434	81.7564	●
PbANKA_13_v3	2424709	2426271	1563	2425306	146	86.0665	8.63789	82.7987	●
PbANKA_13_v3	2434153	2435586	1434	2435103	152	70.8681	6.37409	68.2928	●
PbANKA_13_v3	2436963	2438121	1159	2437823	76	19.2358	3.3517	17.5023	●
PbANKA_13_v3	2455563	2456633	1071	2456288	143	68.5413	6.56233	66.022	●
PbANKA_13_v3	2476016	2476445	430	2476297	73	17.2605	3.17368	15.561	●
PbANKA_13_v3	2493602	2494321	720	2493960	148	72.0915	6.71101	69.4831	●
PbANKA_14_v3	83213	85638	2426	84739	147	70.494	6.57979	67.9273	●
PbANKA_14_v3	89484	90362	879	89883	152	88.9935	8.58421	85.4475	●
PbANKA_14_v3	200789	201128	340	201006	60	14.5989	3.17762	12.9506
PbANKA_14_v3	233802	234557	756	234189	119	58.9334	6.72936	56.6115	●
PbANKA_14_v3	247274	248184	911	247719	148	83.6938	8.15847	80.5987	●
PbANKA_14_v3	261201	262377	1177	261834	154	92.5067	8.91546	88.5012	●
PbANKA_14_v3	264255	264654	400	264453	74	16.4294	3.03765	14.745
PbANKA_14_v3	293808	294311	504	294054	62	18.5784	3.75977	16.8562	●
PbANKA_14_v3	332058	333224	1167	332463	153	86.6294	8.19499	83.3031	●
PbANKA_14_v3	346375	347250	876	346962	152	81.1569	7.56424	78.2097	●
PbANKA_14_v3	352455	354488	2034	353336	154	66.1142	5.79437	63.6492	●
PbANKA_14_v3	356966	357752	787	357494	108	36.5151	4.41472	34.535	●
PbANKA_14_v3	362496	362838	343	362684	56	13.3571	3.10753	11.7349
PbANKA_14_v3	385076	385820	745	385383	117	48.4982	5.46294	46.3446	●
PbANKA_14_v3	392140	392574	435	392320	61	14.4283	3.11818	12.7837
PbANKA_14_v3	426667	427002	336	426819	83	30.7114	4.70637	28.8125	●
PbANKA_14_v3	439961	440316	356	440125	77	21.3881	3.61109	19.6206
PbANKA_14_v3	458335	459533	1199	458889	152	85.4891	8.11524	82.2629	●
PbANKA_14_v3	471590	472275	686	471968	116	41.3822	4.67375	39.3332	●
PbANKA_14_v3	508299	510627	2329	508768	154	93.4294	9.04489	89.2807	●
PbANKA_14_v3	532370	532941	572	532688	143	70.3303	6.77431	67.767	●
PbANKA_14_v3	553165	553528	364	553345	96	31.2521	4.22227	29.3452	●
PbANKA_14_v3	589933	591435	1503	590427	154	90.9202	8.69643	87.1386	●
PbANKA_14_v3	598504	599592	1089	599060	152	85.2482	8.08378	82.0417	●
PbANKA_14_v3	601246	601752	507	601549	65	15.3616	3.13702	13.6975
PbANKA_14_v3	609979	611379	1401	610793	146	88.768	9.03069	85.2454	●
PbANKA_14_v3	632762	635051	2290	633995	153	79.0147	7.24475	76.1654	●
PbANKA_14_v3	653191	653379	189	653307	67	14.8467	3.00549	13.193
PbANKA_14_v3	689108	689459	352	689295	80	27.994	4.44157	26.1318	●
PbANKA_14_v3	691150	691504	355	691397	71	22.29	3.97283	20.5084	●
PbANKA_14_v3	717628	719061	1434	718421	152	87.0185	8.31729	83.6624	●
PbANKA_14_v3	746102	747090	989	746658	143	70.3303	6.77431	67.767	●
PbANKA_14_v3	754619	755522	904	754925	150	72.4758	6.65063	69.8575	●
PbANKA_14_v3	756300	758586	2287	757356	151	74.4247	6.82019	71.7429	●
PbANKA_14_v3	758667	759755	1089	759308	154	81.077	7.43262	78.1348	●
PbANKA_14_v3	821803	822340	538	821956	84	22.1261	3.48788	20.347
PbANKA_14_v3	823071	823449	379	823271	105	43.6251	5.42694	41.5446	●
PbANKA_14_v3	825263	825969	707	825588	153	78.055	7.13152	75.2436	●
PbANKA_14_v3	847413	847749	337	847565	88	26.1463	3.86589	24.309	●
PbANKA_14_v3	848284	849290	1007	849040	104	33.8834	4.25271	31.9399	●
PbANKA_14_v3	855872	856954	1083	856384	154	97.4709	9.63008	92.6696	●
PbANKA_14_v3	860684	861546	863	861109	151	87.8835	8.50746	84.4502	●
PbANKA_14_v3	875796	876796	1001	876235	153	81.6015	7.55711	78.6315	●
PbANKA_14_v3	896812	897691	880	897239	147	80.7945	7.84261	77.8692	●
PbANKA_14_v3	907176	908375	1200	907856	153	76.8776	6.99452	74.1114	●
PbANKA_14_v3	932837	933613	777	933175	153	75.0216	6.78276	72.32	●
PbANKA_14_v3	1033986	1034262	277	1034086	65	19.361	3.76081	17.6256
PbANKA_14_v3	1034469	1035245	777	1035010	86	32.2839	4.79141	30.3626	●
PbANKA_14_v3	1039396	1040361	966	1039959	152	72.5858	6.5618	69.9635	●
PbANKA_14_v3	1044273	1044734	462	1044547	74	22.4045	3.86598	20.6209	●
PbANKA_14_v3	1046636	1048502	1867	1047123	154	75.163	6.74692	72.4571	●
PbANKA_14_v3	1057166	1057496	331	1057294	78	24.3469	3.99059	22.5351
PbANKA_14_v3	1057727	1058203	477	1057973	97	37.7751	5.03098	35.7767	●
PbANKA_14_v3	1066217	1066556	340	1066378	79	29.1414	4.66833	27.2644	●
PbANKA_14_v3	1088381	1088662	282	1088505	84	31.0363	4.70524	29.1325	●
PbANKA_14_v3	1093046	1093697	652	1093396	131	56.3826	5.74577	54.1041	●
PbANKA_14_v3	1095403	1095629	227	1095517	74	20.8957	3.64607	19.1357	●
PbANKA_14_v3	1119634	1120021	388	1119820	70	15.8143	3.05943	14.142
PbANKA_14_v3	1127872	1128317	446	1128086	76	19.5918	3.3993	17.8526
PbANKA_14_v3	1129075	1129390	316	1129249	85	24.004	3.69317	22.1971
PbANKA_14_v3	1130159	1131180	1022	1130895	79	18.3288	3.15249	16.6108
PbANKA_14_v3	1133549	1134015	467	1133885	69	21.8698	3.99415	20.0948	●
PbANKA_14_v3	1137956	1138422	467	1138275	103	44.2363	5.61856	42.1472	●
PbANKA_14_v3	1140533	1141357	825	1140733	71	21.6608	3.87504	19.8889
PbANKA_14_v3	1163507	1164696	1190	1164302	153	82.0609	7.61368	79.0649	●
PbANKA_14_v3	1168936	1170417	1482	1169476	154	86.6997	8.13491	83.3642	●
PbANKA_14_v3	1171543	1172583	1041	1172165	113	37.1671	4.31707	35.1777	●
PbANKA_14_v3	1175730	1176505	776	1176245	62	13.9388	3.01242	12.3039
PbANKA_14_v3	1211788	1212857	1070	1212375	149	91.1719	9.13194	87.3516	●
PbANKA_14_v3	1214897	1215508	612	1215115	48	11.2537	3.01219	9.67919	●
PbANKA_14_v3	1219396	1219619	224	1219493	70	15.7089	3.04502	14.038
PbANKA_14_v3	1225955	1226598	644	1226218	131	66.9056	7.05405	64.423	●
PbANKA_14_v3	1270434	1270723	290	1270598	78	23.2937	3.84053	21.4969
PbANKA_14_v3	1285577	1286762	1186	1286070	154	90.1112	8.58643	86.4204	●
PbANKA_14_v3	1317652	1317955	304	1317725	66	20.063	3.83293	18.3164	●
PbANKA_14_v3	1323169	1325114	1946	1323766	154	82.9677	7.66312	79.92	●
PbANKA_14_v3	1369467	1370917	1451	1370109	151	85.6896	8.21174	82.4492	●
PbANKA_14_v3	1385308	1386667	1360	1385877	154	84.0326	7.79544	80.9143	●
PbANKA_14_v3	1423991	1425420	1430	1424519	154	97.0994	9.57503	92.3999	●
PbANKA_14_v3	1426375	1426928	554	1426478	48	11.2075	3.0034	9.6341
PbANKA_14_v3	1428647	1429525	879	1429162	154	82.9677	7.66312	79.92	●
PbANKA_14_v3	1431019	1432808	1790	1431728	154	93.6662	9.07836	89.5085	●
PbANKA_14_v3	1440068	1440637	570	1440241	66	18.9129	3.64745	17.185	●
PbANKA_14_v3	1481454	1482800	1347	1482401	146	84.4936	8.41564	81.3384	●
PbANKA_14_v3	1485309	1487654	2346	1487137	154	74.2673	6.64758	71.5913
PbANKA_14_v3	1506076	1506554	479	1506260	120	59.6343	6.76338	57.3	●
PbANKA_14_v3	1513071	1513355	285	1513226	76	17.7943	3.16264	16.0856
PbANKA_14_v3	1553195	1554043	849	1553857	75	18.6654	3.30501	16.942
PbANKA_14_v3	1573725	1574359	635	1574033	129	54.0997	5.57539	51.8581	●
PbANKA_14_v3	1643964	1644396	433	1644229	102	33.6131	4.29105	31.6734
PbANKA_14_v3	1685198	1685596	399	1685391	107	44.3309	5.41931	42.2401	●
PbANKA_14_v3	1699965	1701138	1174	1700271	151	63.0559	5.61021	60.6555	●
PbANKA_14_v3	1731304	1731749	446	1731525	74	24.2137	4.14017	22.4039	●
PbANKA_14_v3	1748787	1749610	824	1749180	148	83.8959	8.18572	80.7895	●
PbANKA_14_v3	1752990	1754005	1016	1753423	137	59.5778	5.8326	57.2445	●
PbANKA_14_v3	1782890	1784702	1813	1783403	154	82.2802	7.57865	79.2738	●
PbANKA_14_v3	1807658	1809079	1422	1808181	154	77.0042	6.9548	74.233	●
PbANKA_14_v3	1814392	1815962	1571	1815387	154	74.2673	6.64758	71.5913	●
PbANKA_14_v3	1817234	1817812	579	1817556	124	56.2516	6.07678	53.9779	●
PbANKA_14_v3	1840050	1840830	781	1840334	88	32.4724	4.72063	30.5482	●
PbANKA_14_v3	1840989	1841853	865	1841488	72	20.1453	3.60908	18.3971
PbANKA_14_v3	1843187	1843685	499	1843497	110	42.6158	5.05846	40.5498	●
PbANKA_14_v3	1852491	1852868	378	1852686	98	40.6389	5.38178	38.6005	●
PbANKA_14_v3	1871599	1872215	617	1871811	92	31.2446	4.37508	29.3379	●
PbANKA_14_v3	1902110	1902435	326	1902281	72	18.1658	3.32674	16.4504
PbANKA_14_v3	1902899	1903364	466	1903107	79	19.0284	3.24016	17.2988
PbANKA_14_v3	1909373	1910661	1289	1909948	154	89.7083	8.53207	86.0829	●
PbANKA_14_v3	1921664	1922368	705	1922068	89	30.7946	4.43953	28.8943	●
PbANKA_14_v3	1932814	1934322	1509	1933651	154	91.3337	8.75308	87.4824	●
PbANKA_14_v3	1944234	1944768	535	1944420	70	17.5374	3.30003	15.8331	●
PbANKA_14_v3	1974075	1975971	1897	1974975	151	86.6731	8.34327	83.34	●
PbANKA_14_v3	1976426	1977049	624	1976784	76	25.4569	4.24129	23.6293	●
PbANKA_14_v3	1985350	1986719	1370	1985937	154	85.1197	7.93241	81.923	●
PbANKA_14_v3	1995505	1996653	1149	1996135	154	77.0042	6.9548	74.233	●
PbANKA_14_v3	2012134	2012926	793	2012448	152	75.7243	6.91588	72.9984	●
PbANKA_14_v3	2015807	2016175	369	2015943	95	34.4663	4.67514	32.515	●
PbANKA_14_v3	2027725	2028309	585	2028000	139	68.9716	6.83463	66.4423	●
PbANKA_14_v3	2033467	2034029	563	2033557	64	18.4112	3.64689	16.6919
PbANKA_14_v3	2041414	2041726	313	2041548	80	19.9063	3.32374	18.1622
PbANKA_14_v3	2044334	2046016	1683	2045543	143	67.2234	6.40949	64.7346	●
PbANKA_14_v3	2061557	2062179	623	2061968	82	27.1389	4.22651	25.2885	●
PbANKA_14_v3	2073443	2074377	935	2073879	154	83.8082	7.76741	80.7078	●
PbANKA_14_v3	2082680	2083121	442	2082840	125	57.9632	6.23975	55.6584	●
PbANKA_14_v3	2131354	2132617	1264	2131772	78	27.3086	4.43237	25.4554
PbANKA_14_v3	2138312	2139237	926	2139059	70	22.3569	4.02751	20.5744	●
PbANKA_14_v3	2155830	2156195	366	2156121	75	17.6163	3.16621	15.9106
PbANKA_14_v3	2157005	2157140	136	2157068	59	14.3211	3.16613	12.6785
PbANKA_14_v3	2181693	2182254	562	2181855	93	28.847	4.03215	26.9739
PbANKA_14_v3	2182367	2182929	563	2182647	76	21.6899	3.68766	19.9176	●
PbANKA_14_v3	2199859	2200263	405	2200003	75	24.9582	4.21012	23.1378	●
PbANKA_14_v3	2222568	2223173	606	2222973	102	43.6724	5.5944	41.5914	●
PbANKA_14_v3	2232603	2234535	1933	2233692	154	85.4846	7.97881	82.2616	●
PbANKA_14_v3	2266030	2267366	1337	2266276	93	34.6187	4.78665	32.6654	●
PbANKA_14_v3	2270208	2270339	132	2270269	60	13.7877	3.04877	12.1562
PbANKA_14_v3	2271424	2271786	363	2271596	106	37.95	4.65755	35.9493	●
PbANKA_14_v3	2274773	2277453	2681	2276130	153	88.1467	8.39579	84.6891
PbANKA_14_v3	2299872	2302092	2221	2301199	154	80.9015	7.41151	77.9684	●
PbANKA_14_v3	2304715	2305231	517	2305011	62	17.6575	3.6041	15.9508
PbANKA_14_v3	2306213	2306931	719	2306663	144	82.5048	8.2886	79.4877	●
PbANKA_14_v3	2322135	2323566	1432	2322777	152	65.3008	5.79396	62.8543	●
PbANKA_14_v3	2384640	2385960	1321	2385065	145	79.0161	7.74395	76.1658	●
PbANKA_14_v3	2394567	2395613	1047	2395137	154	88.0059	8.30546	84.5651	●
PbANKA_14_v3	2414471	2415370	900	2414905	148	83.3268	8.10917	80.2571	●
PbANKA_14_v3	2438408	2438627	220	2438479	65	14.6365	3.0304	12.9871
PbANKA_14_v3	2439462	2439710	249	2439575	77	19.4094	3.34523	17.673

## Sheet: 2d
Supplementary file 2d. Peaks identified in ChIP-seq of PFG using AP2-FG(-) <Exp 2>
chr	start	end	length	abs_summit	pileup	-log10(p-value)	fold_enrichment	-log10(q-value)	common
PbANKA_07_v3	628716	629258	543	628916	89	18.9962	3.00122	17.2767	●
PbANKA_05_v3	636519	636850	332	636673	84	18.0473	3.00123	16.349
PbANKA_04_v3	66500	66991	492	66679	99	20.9229	3.00417	19.162	●
PbANKA_12_v3	461493	461809	317	461614	73	15.9864	3.00499	14.3339	●
PbANKA_09_v3	773761	774092	332	773945	111	23.2428	3.00794	21.4307	●
PbANKA_12_v3	108857	109082	226	109028	84	18.1227	3.00988	16.4225
PbANKA_13_v3	1205201	1205773	573	1205582	105	22.1238	3.00995	20.3366	●
PbANKA_10_v3	414404	415561	1158	415162	142	29.1649	3.01044	27.2158	●
PbANKA_11_v3	414040	414752	713	414325	133	27.4821	3.01247	25.5737	●
PbANKA_10_v3	658417	659159	743	658598	115	24.1145	3.01748	22.2828	●
PbANKA_14_v3	847403	847736	334	847554	112	23.5831	3.02113	21.7634	●
PbANKA_04_v3	619392	619680	289	619516	97	20.7441	3.02437	18.9869	●
PbANKA_10_v3	728755	729193	439	729017	97	20.7441	3.02437	18.9869	●
PbANKA_13_v3	2004303	2004790	488	2004590	109	23.0819	3.02769	21.2733
PbANKA_04_v3	666212	666793	582	666464	99	21.181	3.02962	19.4144	●
PbANKA_13_v3	1251646	1252362	717	1251925	90	19.4975	3.03481	17.7671	●
PbANKA_09_v3	431922	433006	1085	432098	115	24.3213	3.03522	22.4853	●
PbANKA_11_v3	157661	158302	642	158053	86	18.7359	3.03599	17.0224	●
PbANKA_11_v3	65632	65848	217	65729	92	19.9327	3.04004	18.1931
PbANKA_11_v3	542141	542632	492	542361	105	22.4914	3.0443	20.696	●
PbANKA_11_v3	765324	765582	259	765492	110	23.4608	3.04443	21.6442	●
PbANKA_08_v3	379654	379935	282	379784	79	17.5023	3.05052	15.8164	●
PbANKA_03_v3	117446	118341	896	117674	98	21.2447	3.05523	19.4768	●
PbANKA_12_v3	1673162	1673563	402	1673380	98	21.2447	3.05523	19.4768	●
PbANKA_10_v3	1138441	1139005	565	1138656	111	23.8014	3.05753	21.977	●
PbANKA_01_v3	146048	146419	372	146162	103	22.2814	3.06125	20.4907	●
PbANKA_06_v3	288657	289877	1221	289351	89	19.561	3.0629	17.8295	●
PbANKA_14_v3	1379669	1380413	745	1379836	78	17.4163	3.06399	15.7322
PbANKA_05_v3	547582	548067	486	547862	110	23.7824	3.07335	21.9584	●
PbANKA_06_v3	84040	84501	462	84326	112	24.3044	3.08483	22.4686	●
PbANKA_12_v3	1243525	1244859	1335	1244139	142	30.2801	3.08899	28.3039	●
PbANKA_13_v3	852818	853442	625	853193	101	22.1872	3.09022	20.3986	●
PbANKA_11_v3	1420725	1421168	444	1420999	80	18.0403	3.09219	16.3421	●
PbANKA_12_v3	712800	713966	1167	713214	100	22.0274	3.094	20.2423	●
PbANKA_13_v3	1745525	1746080	556	1745786	90	20.0691	3.09693	18.3265	●
PbANKA_09_v3	238577	239073	497	238861	89	19.8884	3.09895	18.1498
PbANKA_08_v3	393688	394138	451	393814	76	17.3055	3.09983	15.6237
PbANKA_09_v3	315959	316290	332	316190	107	23.4995	3.10174	21.6818	●
PbANKA_12_v3	1607829	1608148	320	1608000	105	23.1299	3.10445	21.3202	●
PbANKA_09_v3	177967	178702	736	178347	85	19.1709	3.10806	17.448
PbANKA_14_v3	357032	357704	673	357495	126	27.362	3.10831	25.4565	●
PbANKA_14_v3	301202	301735	534	301497	81	18.3867	3.11	16.6809
PbANKA_07_v3	292270	292896	627	292592	112	24.5903	3.11026	22.7487	●
PbANKA_11_v3	1572558	1572901	344	1572711	86	19.4045	3.11189	17.6763
PbANKA_07_v3	586716	586957	242	586853	83	18.8277	3.11477	17.1121	●
PbANKA_11_v3	1082802	1083054	253	1082978	74	17.0351	3.11669	15.3598	●
PbANKA_09_v3	334872	335628	757	335436	91	20.4592	3.11764	18.7083
PbANKA_12_v3	853282	854117	836	853505	82	18.6667	3.11952	16.9545
PbANKA_13_v3	2436445	2438109	1665	2437796	103	22.8956	3.12032	21.0913	●
PbANKA_06_v3	94443	94783	341	94615	82	18.6751	3.12053	16.9629	●
PbANKA_07_v3	532717	533281	565	532971	84	19.0964	3.12273	17.375	●
PbANKA_09_v3	748858	749295	438	749052	104	23.1343	3.12395	21.3243	●
PbANKA_11_v3	1193802	1194197	396	1193976	110	24.447	3.13355	22.6081	●
PbANKA_06_v3	350331	350738	408	350512	97	21.8219	3.13382	20.0411	●
PbANKA_07_v3	446732	446943	212	446827	85	19.3976	3.13429	17.6696	●
PbANKA_14_v3	1317525	1317977	453	1317762	93	21.0201	3.1346	19.2569	●
PbANKA_13_v3	1339645	1339999	355	1339757	80	18.4144	3.1379	16.7077
PbANKA_04_v3	271503	272191	689	271732	95	21.4583	3.1381	19.6856
PbANKA_11_v3	1161288	1162083	796	1161460	114	25.3217	3.13943	23.463	●
PbANKA_06_v3	44487	44561	75	44542	23	6.80885	3.14011	5.43969
PbANKA_13_v3	555211	555648	438	555386	88	20.1287	3.14818	18.3851	●
PbANKA_09_v3	302251	302750	500	302462	82	18.9059	3.14819	17.1884	●
PbANKA_04_v3	139003	140060	1058	139611	105	23.648	3.1537	21.827	●
PbANKA_09_v3	659040	659515	476	659207	105	23.648	3.1537	21.827	●
PbANKA_01_v3	431741	432192	452	431934	85	19.5717	3.1545	17.8398	●
PbANKA_11_v3	635138	636094	957	635500	134	29.6924	3.16381	27.7301	●
PbANKA_08_v3	498942	499186	245	499036	82	19.045	3.16492	17.3247	●
PbANKA_05_v3	365900	366710	811	366252	136	30.1292	3.16588	28.1565	●
PbANKA_03_v3	352661	353311	651	352970	101	22.9582	3.16622	21.1525	●
PbANKA_04_v3	38592	39220	629	38976	96	21.9758	3.17079	20.1917	●
PbANKA_14_v3	352407	354536	2130	353313	142	31.4394	3.17174	29.4339	●
PbANKA_13_v3	1423536	1424471	936	1424198	80	18.6928	3.17215	16.9801	●
PbANKA_02_v3	53327	53441	115	53376	68	16.2598	3.17826	14.6017
PbANKA_05_v3	379210	380083	874	379693	104	23.7279	3.1811	21.9051	●
PbANKA_13_v3	758103	758500	398	758277	115	26.0049	3.18157	24.1305	●
PbANKA_10_v3	360023	360364	342	360130	119	26.8444	3.18273	24.9508	●
PbANKA_13_v3	1037235	1037983	749	1037516	107	24.3678	3.18301	22.5309	●
PbANKA_14_v3	1214953	1215418	466	1215242	82	19.2307	3.18732	17.5064	●
PbANKA_08_v3	857987	858484	498	858251	116	26.3539	3.19403	24.472	●
PbANKA_12_v3	942757	943432	676	943027	93	21.6212	3.19903	19.8449	●
PbANKA_11_v3	1309838	1310385	548	1310122	126	28.5405	3.20299	26.6064	●
PbANKA_09_v3	674158	675151	994	674627	111	25.4219	3.20373	23.5609	●
PbANKA_03_v3	535824	536151	328	535925	100	23.1448	3.20558	21.3347	●
PbANKA_13_v3	865120	865781	662	865385	134	30.2888	3.20924	28.3124	●
PbANKA_13_v3	1724975	1726719	1745	1725759	140	31.5995	3.21347	29.5901	●
PbANKA_13_v3	2003666	2004218	553	2003830	122	27.848	3.21478	25.9302	●
PbANKA_14_v3	2322210	2323634	1425	2322777	142	32.0363	3.2148	30.0161	●
PbANKA_04_v3	340561	341568	1008	340850	113	26.0005	3.21824	24.1262	●
PbANKA_04_v3	194678	195207	530	194976	109	25.162	3.21836	23.3075	●
PbANKA_09_v3	1409051	1409499	449	1409337	88	20.8379	3.22849	19.0786	●
PbANKA_08_v3	1290179	1290698	520	1290592	90	21.2625	3.22872	19.4942	●
PbANKA_10_v3	854023	854320	298	854165	87	20.63	3.22887	18.8753	●
PbANKA_08_v3	888468	889541	1074	888975	137	31.2471	3.23412	29.2471	●
PbANKA_13_v3	1977488	1978640	1153	1978103	141	32.1208	3.23626	30.0983	●
PbANKA_12_v3	585976	586872	897	586274	123	28.3281	3.23728	26.3991	●
PbANKA_06_v3	486671	487044	374	486890	94	22.1993	3.2386	20.4106	●
PbANKA_02_v3	346268	346510	243	346421	101	23.7367	3.24394	21.9138	●
PbANKA_14_v3	553056	553609	554	553334	118	27.4008	3.24863	25.4941	●
PbANKA_14_v3	2271440	2271838	399	2271593	122	28.2754	3.25064	26.3472	●
PbANKA_13_v3	2276745	2277610	866	2277082	83	19.9716	3.25142	18.2313	●
PbANKA_06_v3	630935	632261	1327	631484	89	21.2626	3.25262	19.4944	●
PbANKA_08_v3	435296	436149	854	435504	88	21.0951	3.25788	19.3306	●
PbANKA_09_v3	825564	825851	288	825683	84	20.3003	3.2652	18.5528	●
PbANKA_07_v3	477005	477644	640	477367	93	22.2408	3.26616	20.4511	●
PbANKA_11_v3	418084	418656	573	418407	98	23.3178	3.26657	21.5041	●
PbANKA_11_v3	278260	279141	882	278537	99	23.5546	3.26886	21.7356	●
PbANKA_13_v3	1652147	1652651	505	1652472	111	26.1804	3.2734	24.3022	●
PbANKA_12_v3	1523775	1524604	830	1524412	103	24.4707	3.2745	22.6315	●
PbANKA_12_v3	832063	832580	518	832372	115	27.0551	3.2747	25.1565	●
PbANKA_12_v3	442737	443822	1086	443443	119	27.9296	3.27592	26.0105	●
PbANKA_13_v3	203979	204495	517	204245	119	27.9296	3.27592	26.0105	●
PbANKA_04_v3	171608	172885	1278	171916	121	28.3668	3.27651	26.4369	●
PbANKA_06_v3	466751	468126	1376	467751	121	28.3668	3.27651	26.4369	●
PbANKA_09_v3	898844	899754	911	899022	121	28.3668	3.27651	26.4369	●
PbANKA_11_v3	1270489	1270763	275	1270573	100	23.871	3.27921	22.045
PbANKA_09_v3	1111133	1111636	504	1111289	98	23.4743	3.28283	21.6571	●
PbANKA_11_v3	472090	472446	357	472310	101	24.1814	3.28879	22.3484	●
PbANKA_06_v3	167050	167487	438	167266	94	22.681	3.29055	20.8814	●
PbANKA_13_v3	988209	988611	403	988409	93	22.5099	3.29555	20.714	●
PbANKA_01_v3	408750	409469	720	409145	96	23.2311	3.30292	21.4193	●
PbANKA_10_v3	1418806	1419640	835	1419254	118	28.025	3.30308	26.1032	●
PbANKA_12_v3	435733	436326	594	435946	120	28.462	3.30322	26.5297	●
PbANKA_01_v3	381276	381738	463	381483	124	29.336	3.3035	27.3827	●
PbANKA_14_v3	471671	472248	578	471963	130	30.6465	3.30387	28.6612	●
PbANKA_04_v3	298875	299861	987	299326	142	33.2664	3.30453	31.2134	●
PbANKA_06_v3	452140	453508	1369	453047	142	33.2664	3.30453	31.2134	●
PbANKA_13_v3	346208	346708	501	346587	87	21.3624	3.31385	19.592
PbANKA_11_v3	340213	340804	592	340563	87	21.4082	3.31921	19.6366	●
PbANKA_02_v3	435856	436225	370	436068	97	23.6155	3.32049	21.7953	●
PbANKA_14_v3	1752959	1754142	1184	1753420	139	32.9271	3.3281	30.8837	●
PbANKA_05_v3	909041	909589	549	909287	137	32.4907	3.32833	30.4583	●
PbANKA_04_v3	342823	344179	1357	343374	135	32.0543	3.32858	30.0336	●
PbANKA_13_v3	1785941	1786577	637	1786230	123	29.4347	3.33022	27.4789	●
PbANKA_11_v3	1359340	1359784	445	1359571	117	28.1245	3.33116	26.2004	●
PbANKA_05_v3	141830	142237	408	142001	93	22.8383	3.33161	21.0354	●
PbANKA_01_v3	239172	239436	265	239237	83	20.7377	3.34468	18.9809
PbANKA_12_v3	531754	532214	461	531957	89	22.0896	3.34701	20.3033	●
PbANKA_05_v3	25448	25709	262	25583	61	15.8743	3.34891	14.2246	●
PbANKA_05_v3	627507	629169	1663	628005	142	33.9003	3.3513	31.8293	●
PbANKA_08_v3	575054	576120	1067	575592	142	33.9003	3.3513	31.8293	●
PbANKA_07_v3	471879	472919	1041	472552	97	23.9096	3.35165	22.0828
PbANKA_09_v3	379937	381180	1244	380336	136	32.5917	3.35305	30.5566	●
PbANKA_14_v3	1171650	1172527	878	1172125	120	29.0507	3.35421	27.1043	●
PbANKA_09_v3	465407	465929	523	465662	130	31.2829	3.35497	29.2816	●
PbANKA_14_v3	848303	849293	991	849132	126	30.4103	3.35635	28.431	●
PbANKA_10_v3	1326878	1327678	801	1327440	125	30.289	3.36483	28.3126	●
PbANKA_12_v3	735786	736499	714	736001	99	24.4989	3.36673	22.6592	●
PbANKA_13_v3	2475987	2476464	478	2476241	100	24.7378	3.3683	22.8927	●
PbANKA_14_v3	691265	691570	306	691390	93	23.1719	3.36847	21.3615	●
PbANKA_13_v3	784447	784892	446	784634	98	24.2985	3.36919	22.4629	●
PbANKA_01_v3	330600	330997	398	330749	96	23.8617	3.3704	22.036	●
PbANKA_13_v3	1714892	1715210	319	1715040	80	20.2818	3.37143	18.5346
PbANKA_11_v3	1544713	1544979	267	1544893	91	22.7826	3.37511	20.9807
PbANKA_14_v3	1976319	1977088	770	1976790	96	23.9406	3.37889	22.113	●
PbANKA_06_v3	367210	368639	1430	367964	103	25.5385	3.38132	23.6751	●
PbANKA_12_v3	242297	243124	828	242691	97	24.2077	3.3834	22.3742	●
PbANKA_04_v3	568685	568942	258	568776	88	22.2203	3.38816	20.4311	●
PbANKA_12_v3	101231	101617	387	101404	92	23.2433	3.40163	21.4312	●
PbANKA_03_v3	226382	226686	305	226488	99	24.8471	3.40322	22.9992	●
PbANKA_05_v3	650068	650789	722	650445	99	24.8471	3.40322	22.9992	●
PbANKA_08_v3	1235316	1235966	651	1235690	134	32.8049	3.40475	30.7642	●
PbANKA_13_v3	437645	439305	1661	438746	133	32.7445	3.41801	30.7052	●
PbANKA_13_v3	1308180	1308775	596	1308483	96	24.328	3.42079	22.4919	●
PbANKA_11_v3	1485469	1485892	424	1485674	116	28.9151	3.42231	26.972	●
PbANKA_11_v3	524	594	71	563	3	4.52934	3.42235	3.28032	●
PbANKA_05_v3	491688	492446	759	492148	110	27.5777	3.42556	25.6668	●
PbANKA_03_v3	133753	134230	478	133955	123	30.5949	3.42922	28.6108	●
PbANKA_09_v3	564374	565032	659	564699	135	33.3525	3.42997	31.2973	●
PbANKA_08_v3	1190864	1191417	554	1191150	107	26.9371	3.43008	25.0413	●
PbANKA_13_v3	1324958	1325486	529	1325171	104	26.271	3.4323	24.391	●
PbANKA_14_v3	1944130	1944742	613	1944510	111	27.9112	3.43548	25.9925	●
PbANKA_06_v3	151115	152705	1591	151961	109	27.4718	3.43743	25.5635	●
PbANKA_03_v3	47314	47820	507	47560	98	24.9495	3.43829	23.0997	●
PbANKA_11_v3	387795	388970	1176	388524	123	30.7417	3.44187	28.7538	●
PbANKA_14_v3	1057742	1058227	486	1057984	123	30.7417	3.44187	28.7538	●
PbANKA_13_v3	976682	976941	260	976799	94	24.08	3.44399	22.2495	●
PbANKA_13_v3	2144668	2145083	416	2144871	119	29.8715	3.44638	27.9051	●
PbANKA_09_v3	840946	841666	721	841460	95	24.3335	3.44649	22.4973	●
PbANKA_12_v3	1488481	1489084	604	1488844	121	30.3455	3.44749	28.368	●
PbANKA_06_v3	773400	773933	534	773560	89	22.9667	3.44875	21.1608	●
PbANKA_10_v3	431204	432884	1681	432065	142	35.2075	3.44893	33.0999	●
PbANKA_13_v3	2342435	2344385	1951	2343531	142	35.2075	3.44893	33.0999	●
PbANKA_08_v3	211207	212165	959	211738	140	34.7728	3.45095	32.6771	●
PbANKA_08_v3	1279386	1280065	680	1279673	113	28.5664	3.45377	26.6315	●
PbANKA_13_v3	1869750	1870086	337	1869911	99	25.3762	3.45911	23.5165	●
PbANKA_11_v3	1682955	1683174	220	1683053	93	24.0054	3.46155	22.1764	●
PbANKA_14_v3	2061692	2063112	1421	2061988	100	25.6878	3.46747	23.8209	●
PbANKA_08_v3	767187	767771	585	767448	107	27.3207	3.46786	25.416	●
PbANKA_14_v3	1095341	1095722	382	1095528	103	26.3919	3.46807	24.5088	●
PbANKA_05_v3	676148	676705	558	676446	133	33.4081	3.47116	31.3511	●
PbANKA_03_v3	377842	378325	484	378146	101	25.9571	3.47129	24.0837	●
PbANKA_05_v3	212420	213656	1237	212750	120	30.4265	3.4751	28.4467	●
PbANKA_13_v3	2059032	2059964	933	2059374	141	35.3257	3.47543	33.2138	●
PbANKA_13_v3	1299474	1300489	1016	1300205	139	34.8914	3.47788	32.792	●
PbANKA_10_v3	1095156	1095767	612	1095450	122	30.9969	3.4842	29.0028	●
PbANKA_10_v3	405547	406265	719	405845	104	26.8084	3.48674	24.916	●
PbANKA_14_v3	2266074	2267400	1327	2266301	106	27.3444	3.49347	25.4395	●
PbANKA_02_v3	444468	445436	969	444768	132	33.4781	3.49573	31.4189	●
PbANKA_05_v3	345290	347544	2255	346937	140	35.4479	3.50273	33.3321	●
PbANKA_03_v3	254602	255651	1050	255224	102	26.5184	3.50532	24.6322	●
PbANKA_09_v3	1229803	1230407	605	1230151	99	25.8255	3.50696	23.9556	●
PbANKA_08_v3	380483	381216	734	380734	91	23.9495	3.50867	22.1218	●
PbANKA_11_v3	116958	117351	394	117127	106	27.5505	3.51413	25.6403	●
PbANKA_14_v3	823070	823469	400	823273	113	29.2503	3.51814	27.299	●
PbANKA_12_v3	587785	588933	1149	588133	115	29.7566	3.52113	27.793	●
PbANKA_12_v3	1051878	1052404	527	1052147	90	23.825	3.52179	22.0001	●
PbANKA_12_v3	193455	194729	1275	194340	129	33.1138	3.52411	31.065	●
PbANKA_08_v3	488075	489241	1167	488747	126	32.4134	3.52514	30.3829	●
PbANKA_07_v3	277639	278047	409	277836	92	24.35	3.52749	22.5133	●
PbANKA_03_v3	191987	193128	1142	192518	141	36.0075	3.52757	33.8758	●
PbANKA_14_v3	2012126	2013031	906	2012440	141	36.0075	3.52757	33.8758	●
PbANKA_05_v3	721614	722231	618	721874	139	35.5744	3.53086	33.4556	●
PbANKA_13_v3	1768564	1769206	643	1768782	139	35.5744	3.53086	33.4556	●
PbANKA_12_v3	1620356	1621102	747	1620764	137	35.1414	3.53424	33.0354	●
PbANKA_13_v3	1797595	1798511	917	1798219	137	35.1414	3.53424	33.0354	●
PbANKA_14_v3	1133485	1134095	611	1133825	94	24.89	3.53465	23.0412	●
PbANKA_14_v3	2199844	2200163	320	2200014	102	26.8141	3.53613	24.9214	●
PbANKA_14_v3	293853	294285	433	294050	89	23.7163	3.53709	21.8939	●
PbANKA_14_v3	2182187	2182896	710	2182675	118	30.6811	3.54047	28.6947	●
PbANKA_01_v3	185924	186885	962	186510	99	26.2182	3.54911	24.3392	●
PbANKA_12_v3	930358	930681	324	930536	99	26.2182	3.54911	24.3392	●
PbANKA_08_v3	1158856	1159227	372	1159008	94	25.0254	3.54994	23.1738	●
PbANKA_03_v3	304962	305701	740	305197	109	28.6431	3.55164	26.7071	●
PbANKA_03_v3	242358	243885	1528	243268	142	36.57	3.55241	34.4214	●
PbANKA_07_v3	288699	289957	1259	289223	142	36.57	3.55241	34.4214	●
PbANKA_12_v3	1656412	1656940	529	1656851	142	36.57	3.55241	34.4214	●
PbANKA_14_v3	825210	825968	759	825586	142	36.57	3.55241	34.4214	●
PbANKA_14_v3	1871671	1872301	631	1871829	112	29.3828	3.55351	27.4284	●
PbANKA_14_v3	1921673	1922578	906	1922019	112	29.3828	3.55351	27.4284	●
PbANKA_11_v3	103312	103850	539	103673	104	27.471	3.55456	25.5627	●
PbANKA_11_v3	265617	266547	931	266105	140	36.1376	3.55608	34.0017	●
PbANKA_06_v3	907107	907504	398	907270	98	26.0955	3.56187	24.2191	●
PbANKA_12_v3	358960	360158	1199	359896	93	24.9079	3.56397	23.0589
PbANKA_13_v3	1456778	1457258	481	1456929	106	28.0784	3.56738	26.1559	●
PbANKA_12_v3	782954	783589	636	783272	134	34.8408	3.56778	32.7426	●
PbANKA_11_v3	1614867	1615587	721	1615088	102	27.1198	3.56817	25.2197	●
PbANKA_08_v3	1249769	1250786	1018	1250259	141	36.7039	3.5813	34.5506	●
PbANKA_08_v3	1210443	1211369	927	1210693	100	26.7898	3.5846	24.898	●
PbANKA_06_v3	405081	405691	611	405376	102	27.3378	3.59111	25.4329	●
PbANKA_11_v3	1446298	1447237	940	1446950	135	35.4092	3.5942	33.2956	●
PbANKA_06_v3	216631	218317	1687	217428	136	35.6851	3.59681	33.5631	●
PbANKA_08_v3	788371	789857	1487	788722	142	37.2731	3.60652	35.1029	●
PbANKA_13_v3	2434165	2435587	1423	2435083	142	37.2731	3.60652	35.1029	●
PbANKA_08_v3	533920	534229	310	534076	109	29.1986	3.60656	27.2489	●
PbANKA_10_v3	971430	971751	322	971587	105	28.2719	3.61201	26.344	●
PbANKA_13_v3	1519285	1519543	259	1519412	106	28.5407	3.6144	26.6066	●
PbANKA_14_v3	1034575	1035214	640	1035010	112	30.0954	3.6223	28.1237	●
PbANKA_13_v3	994446	994809	364	994628	121	32.3196	3.62309	30.2919	●
PbANKA_01_v3	138111	138814	704	138424	99	26.9467	3.62808	25.0508	●
PbANKA_14_v3	1731332	1731802	471	1731536	99	26.9467	3.62808	25.0508	●
PbANKA_04_v3	259361	259684	324	259511	95	25.9739	3.62976	24.1002	●
PbANKA_13_v3	2362997	2363811	815	2363509	101	27.4588	3.63005	25.551	●
PbANKA_11_v3	525214	525561	348	525398	91	25.0271	3.63468	23.1755	●
PbANKA_14_v3	2015765	2016163	399	2015947	116	31.3467	3.64738	29.3436	●
PbANKA_03_v3	238735	239432	698	239076	100	27.4601	3.65696	25.5523	●
PbANKA_12_v3	164435	165023	589	164733	99	27.2329	3.65939	25.3301	●
PbANKA_08_v3	996824	997307	484	997081	96	26.5093	3.66223	24.6235	●
PbANKA_03_v3	66755	69496	2742	68878	142	37.9914	3.6623	35.797	●
PbANKA_11_v3	905514	906661	1148	906004	142	37.9914	3.6623	35.797	●
PbANKA_12_v3	403685	405615	1931	404598	142	37.9914	3.6623	35.797	●
PbANKA_13_v3	1046622	1047736	1115	1046950	142	37.9914	3.6623	35.797	●
PbANKA_13_v3	2244962	2246071	1110	2245589	142	37.9914	3.6623	35.797	●
PbANKA_14_v3	1039486	1040594	1109	1039977	142	37.9914	3.6623	35.797	●
PbANKA_14_v3	1807629	1809097	1469	1808176	142	37.9914	3.6623	35.797	●
PbANKA_14_v3	1995268	1996692	1425	1996136	142	37.9914	3.6623	35.797	●
PbANKA_06_v3	98146	99082	937	98390	131	35.267	3.66392	33.1572	●
PbANKA_07_v3	479665	480569	905	480148	103	28.304	3.66709	26.3754	●
PbANKA_13_v3	1488317	1488835	519	1488695	90	25.0674	3.66913	23.2147	●
PbANKA_03_v3	136410	136859	450	136715	104	28.6045	3.67237	26.6691	●
PbANKA_14_v3	1044251	1044715	465	1044544	108	29.6752	3.67929	27.7136	●
PbANKA_13_v3	2493638	2494292	655	2493955	142	38.215	3.67977	36.0125	●
PbANKA_08_v3	366248	367117	870	366386	125	33.9806	3.68257	31.9074	●
PbANKA_02_v3	157699	158917	1219	158721	105	28.9583	3.68311	27.014	●
PbANKA_09_v3	136515	137167	653	137107	114	31.2558	3.68641	29.2551	●
PbANKA_10_v3	306245	306585	341	306420	109	30.0811	3.69487	28.1097	●
PbANKA_11_v3	597312	598855	1544	597661	121	33.1242	3.69614	31.0749	●
PbANKA_12_v3	113455	114270	816	113720	121	33.1242	3.69614	31.0749	●
PbANKA_07_v3	339299	339847	549	339642	123	33.6343	3.69661	31.5704	●
PbANKA_09_v3	1541359	1541775	417	1541579	100	27.8714	3.70179	25.9533	●
PbANKA_10_v3	1438120	1439267	1148	1438322	98	27.3863	3.70416	25.4802	●
PbANKA_12_v3	871477	872160	684	871810	128	34.9918	3.70486	32.8899	●
PbANKA_07_v3	360629	361314	686	360803	118	32.5117	3.70972	30.4789	●
PbANKA_09_v3	1388413	1388906	494	1388702	108	30.0241	3.71478	28.054	●
PbANKA_11_v3	1377672	1377991	320	1377840	97	27.248	3.71714	25.3449	●
PbANKA_02_v3	112477	113245	769	112835	142	38.7252	3.71983	36.5055	●
PbANKA_04_v3	501834	504280	2447	503443	142	38.7252	3.71983	36.5055	●
PbANKA_12_v3	1636062	1637216	1155	1636668	142	38.7252	3.71983	36.5055	●
PbANKA_04_v3	61799	62469	671	62098	140	38.2981	3.72634	36.0934	●
PbANKA_12_v3	1474889	1475245	357	1475039	100	28.1119	3.72815	26.1882	●
PbANKA_07_v3	642171	645329	3159	643015	142	38.8434	3.72915	36.6195	●
PbANKA_12_v3	1361468	1361984	517	1361648	97	27.3957	3.73384	25.4894	●
PbANKA_11_v3	1006262	1006865	604	1006507	91	25.8717	3.73529	24.0005	●
PbANKA_09_v3	1064993	1065316	324	1065145	104	29.2046	3.73568	27.2549	●
PbANKA_14_v3	2044326	2046053	1728	2045508	142	38.9492	3.7375	36.7214	●
PbANKA_09_v3	333133	333914	782	333575	113	31.5292	3.73771	29.5218	●
PbANKA_14_v3	1088315	1088661	347	1088507	101	28.4941	3.74197	26.5613	●
PbANKA_03_v3	295191	295787	597	295440	118	32.8571	3.74219	30.8148	●
PbANKA_11_v3	1313105	1314750	1646	1314252	142	39.1086	3.75011	36.8763	●
PbANKA_14_v3	1573619	1574291	673	1574033	132	36.5926	3.75462	34.4432	●
PbANKA_14_v3	1440028	1440823	796	1440257	104	29.4151	3.75803	27.4598	●
PbANKA_14_v3	907216	908287	1072	907862	142	39.2154	3.75856	36.979	●
PbANKA_04_v3	354837	356355	1519	355507	130	36.1526	3.76106	34.0165	●
PbANKA_13_v3	541479	541932	454	541672	117	32.8199	3.76305	30.779	●
PbANKA_10_v3	1173572	1174081	510	1173802	107	30.358	3.7756	28.3803	●
PbANKA_10_v3	759554	759964	411	759760	106	30.1272	3.77859	28.1545	●
PbANKA_06_v3	542706	543655	950	543188	142	39.4752	3.7792	37.2299	●
PbANKA_13_v3	1942515	1943536	1022	1943104	142	39.4752	3.7792	37.2299	●
PbANKA_13_v3	1955151	1961208	6058	1958622	142	39.4752	3.7792	37.2299
PbANKA_08_v3	583135	583650	516	583400	100	28.5782	3.7796	26.6432	●
PbANKA_13_v3	1134566	1134963	398	1134727	125	35.0785	3.78039	32.9739	●
PbANKA_02_v3	98104	98682	579	98432	114	32.2299	3.78113	30.2048	●
PbANKA_13_v3	2055262	2057541	2280	2056783	142	39.5375	3.78415	37.2909	●
PbANKA_14_v3	426661	427018	358	426834	103	29.4458	3.78911	27.4895	●
PbANKA_11_v3	1332682	1333630	949	1333230	138	38.6261	3.79461	36.4099	●
PbANKA_14_v3	689132	689446	315	689287	104	29.7588	3.79472	27.7952	●
PbANKA_11_v3	1638142	1638662	521	1638397	106	30.3076	3.79755	28.3306	●
PbANKA_11_v3	1595858	1596513	656	1596201	103	29.6053	3.80636	27.6453	●
PbANKA_03_v3	369116	369634	519	369462	102	29.3971	3.81224	27.4422	●
PbANKA_09_v3	1333468	1334895	1428	1333965	141	39.6447	3.81364	37.3935	●
PbANKA_10_v3	278013	278490	478	278245	123	35.0657	3.82675	32.9612	●
PbANKA_11_v3	1139619	1140307	689	1140004	137	38.7986	3.83046	36.576	●
PbANKA_12_v3	395428	396208	781	395824	114	32.7761	3.83489	30.736	●
PbANKA_03_v3	106996	107920	925	107571	142	40.2419	3.84049	37.9705	●
PbANKA_08_v3	413570	414870	1301	414075	142	40.2419	3.84049	37.9705	●
PbANKA_12_v3	678744	682349	3606	679881	142	40.2419	3.84049	37.9705	●
PbANKA_14_v3	1323145	1325160	2016	1323755	142	40.2419	3.84049	37.9705	●
PbANKA_10_v3	703302	704276	975	703812	142	40.3009	3.84523	38.0274	●
PbANKA_01_v3	454564	455166	603	454801	135	38.4765	3.84777	36.2656	●
PbANKA_12_v3	1039706	1040438	733	1039999	124	35.5775	3.84943	33.4586	●
PbANKA_08_v3	1014683	1015430	748	1014990	110	31.9332	3.85684	29.9156	●
PbANKA_08_v3	645343	646015	673	645727	103	30.1125	3.8615	28.1405	●
PbANKA_09_v3	1549442	1549902	461	1549686	120	34.67	3.86401	32.5769	●
PbANKA_07_v3	127179	127994	816	127617	136	38.9772	3.86754	36.7481	●
PbANKA_13_v3	935886	936348	463	936172	129	37.1117	3.86775	34.9458	●
PbANKA_09_v3	664444	665062	619	664771	108	31.5127	3.86853	29.5057	●
PbANKA_12_v3	371580	372361	782	371951	108	31.558	3.87326	29.5496	●
PbANKA_12_v3	1030878	1031473	596	1031062	106	31.0929	3.88072	29.0968	●
PbANKA_13_v3	575982	576985	1004	576308	105	30.8932	3.8881	28.902	●
PbANKA_12_v3	982113	982569	457	982320	109	32.0531	3.89692	30.0325	●
PbANKA_14_v3	1843018	1843786	769	1843465	130	37.7167	3.8975	35.5306	●
PbANKA_05_v3	298319	298883	565	298512	108	31.8072	3.8994	29.7928	●
PbANKA_13_v3	2189830	2191121	1292	2190170	123	35.8519	3.89942	33.7252	●
PbANKA_11_v3	291740	292218	479	291924	116	33.9867	3.90158	31.913	●
PbANKA_14_v3	2222533	2223204	672	2222982	113	33.1843	3.90229	31.1334	●
PbANKA_06_v3	425165	426455	1291	425803	142	41.0258	3.90381	38.7259	●
PbANKA_08_v3	1123833	1124667	835	1124207	142	41.0258	3.90381	38.7259	●
PbANKA_03_v3	508761	509485	725	509162	119	34.8238	3.90424	32.7267	●
PbANKA_11_v3	269357	269736	380	269551	121	35.3892	3.90664	33.2762	●
PbANKA_13_v3	488829	489313	485	489074	116	34.0581	3.9086	31.9825	●
PbANKA_12_v3	539893	540736	844	540417	120	35.1775	3.91222	33.0707	●
PbANKA_09_v3	158744	159801	1058	159257	140	40.6068	3.91374	38.3218	●
PbANKA_10_v3	1080343	1081164	822	1080790	140	40.6068	3.91374	38.3218	●
PbANKA_05_v3	364396	364892	497	364648	130	37.9182	3.9153	35.7265	●
PbANKA_13_v3	584783	585543	761	585049	133	38.7431	3.91639	36.5226	●
PbANKA_13_v3	220919	221432	514	221121	107	31.7032	3.91699	29.6913	●
PbANKA_11_v3	868344	869097	754	868664	137	39.853	3.91862	37.5956	●
PbANKA_10_v3	1192281	1192763	483	1192555	100	29.8377	3.92074	27.8723	●
PbANKA_13_v3	2211914	2212340	427	2212088	98	29.3158	3.92319	27.3634	●
PbANKA_12_v3	1433561	1434113	553	1433881	138	40.1884	3.924	37.9195	●
PbANKA_08_v3	53078	54046	969	53703	135	39.4301	3.92879	37.1871	●
PbANKA_10_v3	490061	491362	1302	490460	141	41.2157	3.94149	38.9091	●
PbANKA_10_v3	1599219	1600172	954	1599707	141	41.2157	3.94149	38.9091	●
PbANKA_14_v3	746164	746932	769	746664	141	41.2157	3.94149	38.9091	●
PbANKA_10_v3	1169003	1169840	838	1169564	112	33.3166	3.9433	31.2624	●
PbANKA_03_v3	146940	147457	518	147125	100	30.1194	3.95275	28.1469	●
PbANKA_11_v3	1036421	1036558	138	1036513	108	32.3174	3.95326	30.2898	●
PbANKA_06_v3	892790	893536	747	893072	141	41.3816	3.95515	39.0698	●
PbANKA_05_v3	791579	792064	486	791824	113	33.7649	3.96108	31.6978	●
PbANKA_05_v3	200728	201979	1252	201217	137	40.3822	3.96334	38.1053	●
PbANKA_06_v3	185677	186442	766	186077	137	40.3822	3.96334	38.1053	●
PbANKA_10_v3	1322984	1324108	1125	1323608	117	34.895	3.96416	32.7952	●
PbANKA_14_v3	2138258	2139290	1033	2139094	101	30.5394	3.96924	28.5571	●
PbANKA_07_v3	491094	494687	3594	492423	142	41.8276	3.96925	39.4994	●
PbANKA_10_v3	672733	673753	1021	673081	142	41.8276	3.96925	39.4994	●
PbANKA_10_v3	946608	947830	1223	947441	142	41.8276	3.96925	39.4994	●
PbANKA_11_v3	1097225	1098603	1379	1098258	142	41.8276	3.96925	39.4994	●
PbANKA_12_v3	1562137	1564107	1971	1562940	142	41.8276	3.96925	39.4994	●
PbANKA_13_v3	2274428	2275427	1000	2274987	142	41.8276	3.96925	39.4994	●
PbANKA_12_v3	790743	792696	1954	791265	135	39.9664	3.97484	37.7055	●
PbANKA_13_v3	2369487	2370281	795	2369914	119	35.5997	3.97919	33.4802	●
PbANKA_02_v3	541372	542817	1446	542486	121	36.2441	3.988	34.1054	●
PbANKA_11_v3	1628042	1628723	682	1628362	138	40.9815	3.99074	38.6845	●
PbANKA_05_v3	560186	561254	1069	560454	111	33.602	4.0012	31.5392	●
PbANKA_07_v3	783963	784561	599	784199	119	35.8302	4.00162	33.7047	●
PbANKA_10_v3	512990	513693	704	513384	107	32.5223	4.00471	30.4892	●
PbANKA_06_v3	366550	367120	571	367034	108	32.9342	4.019	30.8906	●
PbANKA_14_v3	83345	85664	2320	84598	142	42.4608	4.02142	40.1103	●
PbANKA_11_v3	1582974	1583458	485	1583200	103	31.6668	4.03361	29.6564	●
PbANKA_09_v3	590976	591759	784	591429	142	42.6478	4.03692	40.2897	●
PbANKA_11_v3	642525	648156	5632	646291	142	42.6478	4.03692	40.2897	●
PbANKA_12_v3	285075	286889	1815	286113	142	42.6478	4.03692	40.2897	●
PbANKA_14_v3	1699947	1700957	1011	1700278	142	42.6478	4.03692	40.2897	●
PbANKA_10_v3	176724	177412	689	177057	141	42.3695	4.03712	40.0208	●
PbANKA_13_v3	2213701	2214160	460	2213956	134	40.4971	4.04521	38.2167	●
PbANKA_07_v3	186146	186928	783	186549	140	42.236	4.0495	39.892	●
PbANKA_06_v3	359164	359906	743	359530	121	36.9608	4.05704	34.7997	●
PbANKA_01_v3	361668	363262	1595	362950	133	40.3793	4.0597	38.1032	●
PbANKA_13_v3	624604	625128	525	624894	125	38.2096	4.06824	36.0073	●
PbANKA_01_v3	440188	441845	1658	440889	142	43.0516	4.07051	40.6783	●
PbANKA_13_v3	2090932	2092262	1331	2091508	141	42.844	4.07687	40.4793	●
PbANKA_07_v3	465907	466771	865	466238	119	36.606	4.07775	34.4563	●
PbANKA_14_v3	754523	755493	971	754900	141	42.86	4.07822	40.4935	●
PbANKA_08_v3	291403	292417	1015	291608	114	35.2215	4.08147	33.1129	●
PbANKA_08_v3	914264	915712	1449	915006	142	43.2307	4.08547	40.8513	●
PbANKA_14_v3	1685138	1685587	450	1685386	124	38.114	4.08607	35.9154	●
PbANKA_13_v3	780271	781088	818	780687	139	42.4507	4.09175	40.1002	●
PbANKA_13_v3	1810403	1811618	1216	1811003	139	42.4507	4.09175	40.1002	●
PbANKA_11_v3	1594756	1595728	973	1595397	122	37.7058	4.10166	35.5206	●
PbANKA_01_v3	53275	55083	1809	54570	142	43.4871	4.10694	41.0963	●
PbANKA_09_v3	82014	83297	1284	82705	142	43.4871	4.10694	41.0963	●
PbANKA_10_v3	1065074	1066032	959	1065537	142	43.4871	4.10694	41.0963	●
PbANKA_12_v3	558594	561520	2927	560420	142	43.4871	4.10694	41.0963	●
PbANKA_13_v3	1824822	1825892	1071	1825316	142	43.4871	4.10694	41.0963	●
PbANKA_05_v3	221653	222846	1194	222258	142	43.5313	4.11064	41.1386	●
PbANKA_13_v3	2005073	2007954	2882	2006475	142	43.5313	4.11064	41.1386	●
PbANKA_08_v3	974918	975352	435	975111	114	35.5129	4.11153	33.3957	●
PbANKA_14_v3	1840025	1841936	1912	1840329	115	35.8529	4.11697	33.7257	●
PbANKA_05_v3	870033	871119	1087	870755	140	43.0795	4.12097	40.7046	●
PbANKA_09_v3	1286564	1287233	670	1286868	140	43.0795	4.12097	40.7046	●
PbANKA_12_v3	76477	76935	459	76719	125	38.8138	4.12535	36.5905	●
PbANKA_14_v3	2131329	2132602	1274	2132074	108	34.0012	4.13437	31.9272
PbANKA_11_v3	595164	595737	574	595456	132	40.9856	4.13952	38.6885	●
PbANKA_11_v3	664202	664837	636	664558	132	40.9856	4.13952	38.6885	●
PbANKA_09_v3	992297	993686	1390	992798	140	43.3012	4.1399	40.919	●
PbANKA_12_v3	416020	416774	755	416560	111	34.9335	4.1414	32.8329	●
PbANKA_07_v3	306782	308179	1398	307414	138	42.7681	4.14378	40.4051	●
PbANKA_10_v3	771606	772389	784	772113	141	43.7113	4.1502	41.31	●
PbANKA_11_v3	626706	628230	1525	627223	141	43.7113	4.1502	41.31	●
PbANKA_12_v3	1511560	1512466	907	1512132	136	42.267	4.15058	39.922	●
PbANKA_04_v3	179587	180437	851	180049	136	42.3578	4.15857	40.0098	●
PbANKA_12_v3	238244	238782	539	238471	124	38.8908	4.16036	36.6655	●
PbANKA_08_v3	176450	177391	942	177019	119	37.4603	4.16266	35.2832	●
PbANKA_11_v3	1685170	1685802	633	1685540	139	43.3064	4.16526	40.9234	●
PbANKA_06_v3	428835	429858	1024	429660	99	31.7491	4.17559	29.7362	●
PbANKA_03_v3	494104	496197	2094	495480	142	44.3462	4.17943	41.9189	●
PbANKA_08_v3	655211	656774	1564	656203	142	44.3462	4.17943	41.9189	●
PbANKA_10_v3	1054376	1056032	1657	1055165	142	44.3462	4.17943	41.9189	●
PbANKA_12_v3	226518	228049	1532	227228	142	44.3462	4.17943	41.9189	●
PbANKA_14_v3	1046556	1048587	2032	1047121	142	44.3462	4.17943	41.9189	●
PbANKA_11_v3	492393	493111	719	492835	128	40.4079	4.19355	38.1305	●
PbANKA_06_v3	786633	787588	956	787148	140	43.9432	4.19502	41.5335	●
PbANKA_14_v3	532381	533077	697	532684	140	43.9432	4.19502	41.5335	●
PbANKA_11_v3	1298333	1299391	1059	1299051	115	36.6138	4.19551	34.464	●
PbANKA_04_v3	477483	478399	917	477905	142	44.572	4.19862	42.1362	●
PbANKA_08_v3	760634	761599	966	761171	120	38.1694	4.20431	35.9681	●
PbANKA_04_v3	310673	312067	1395	311554	141	44.3684	4.20633	41.9403	●
PbANKA_12_v3	714806	716039	1234	715534	142	44.6964	4.20922	42.2547	●
PbANKA_14_v3	385057	385959	903	385383	133	42.0552	4.20998	39.7183	●
PbANKA_08_v3	861428	863397	1970	862217	142	44.7588	4.21454	42.3149	●
PbANKA_08_v3	1116650	1116989	340	1116853	116	37.0994	4.21534	34.9341	●
PbANKA_14_v3	2082609	2083252	644	2082835	133	42.1177	4.21565	39.7782	●
PbANKA_05_v3	94642	95650	1009	95170	128	40.6554	4.21682	38.3683	●
PbANKA_11_v3	552417	552878	462	552694	113	36.2648	4.22071	34.1255	●
PbANKA_13_v3	195273	195916	644	195665	130	41.321	4.22383	39.0103	●
PbANKA_12_v3	949322	950154	833	949709	136	43.1653	4.23015	40.7876	●
PbANKA_10_v3	883832	884275	444	884074	121	38.7679	4.23456	36.5464	●
PbANKA_09_v3	1272203	1272655	453	1272455	103	33.4392	4.23577	31.3815	●
PbANKA_13_v3	856067	857465	1399	856531	140	44.4156	4.23589	41.9857	●
PbANKA_05_v3	844311	847564	3254	845051	142	45.0093	4.23595	42.5549	●
PbANKA_14_v3	932790	933585	796	933172	142	45.0722	4.24134	42.6147	●
PbANKA_14_v3	1093095	1093688	594	1093403	134	42.7411	4.24534	40.3792	●
PbANKA_05_v3	438847	439615	769	439196	142	45.2259	4.25452	42.7607	●
PbANKA_09_v3	1014779	1016175	1397	1015515	142	45.2259	4.25452	42.7607	●
PbANKA_11_v3	225780	227477	1698	226149	142	45.2259	4.25452	42.7607	●
PbANKA_11_v3	1191585	1193298	1714	1192114	142	45.2259	4.25452	42.7607	●
PbANKA_13_v3	166092	168484	2393	167174	142	45.2259	4.25452	42.7607	●
PbANKA_13_v3	1003392	1004711	1320	1004118	142	45.2259	4.25452	42.7607	●
PbANKA_13_v3	1666607	1667739	1133	1667304	142	45.2259	4.25452	42.7607	●
PbANKA_14_v3	598419	599880	1462	599072	142	45.2259	4.25452	42.7607	●
PbANKA_14_v3	875678	876789	1112	876236	142	45.2259	4.25452	42.7607	●
PbANKA_14_v3	2299669	2301967	2299	2301271	142	45.2259	4.25452	42.7607	●
PbANKA_13_v3	1460077	1460933	857	1460501	141	45.1869	4.27695	42.725	●
PbANKA_06_v3	144132	145159	1028	144588	142	45.5154	4.27943	43.0373	●
PbANKA_11_v3	401880	402935	1056	402300	142	45.5154	4.27943	43.0373	●
PbANKA_13_v3	722772	723152	381	722935	98	32.3141	4.2795	30.2868	●
PbANKA_11_v3	1305892	1306721	830	1306262	130	41.9461	4.2822	39.6136
PbANKA_06_v3	178323	179050	728	178654	119	38.6652	4.28438	36.4481	●
PbANKA_06_v3	618792	620312	1521	619651	142	45.643	4.29044	43.1595	●
PbANKA_12_v3	1493343	1494283	941	1493556	120	39.0521	4.29313	36.8211	●
PbANKA_14_v3	758496	759851	1356	759330	142	45.771	4.30151	43.2802	●
PbANKA_01_v3	172798	173372	575	173060	119	38.8522	4.30348	36.6282	●
PbANKA_12_v3	876650	877511	862	876959	118	38.5879	4.30736	36.3726	●
PbANKA_13_v3	193277	193683	407	193497	116	38.0076	4.30988	35.8128	●
PbANKA_10_v3	1355250	1355708	459	1355508	136	44.056	4.31003	41.6419	●
PbANKA_01_v3	221802	222211	410	222044	114	37.4207	4.31181	35.2446	●
PbANKA_12_v3	244962	245599	638	245321	131	42.5965	4.31489	40.2408	●
PbANKA_13_v3	1895851	1896368	518	1896141	124	40.4779	4.31493	38.1979	●
PbANKA_10_v3	755720	756231	512	755997	118	38.6711	4.31594	36.4536	●
PbANKA_10_v3	785616	786493	878	785919	141	45.6352	4.31596	43.1522	●
PbANKA_02_v3	23874	24299	426	24143	105	34.7442	4.31726	32.6492	●
PbANKA_04_v3	98347	99614	1268	98998	142	46.1268	4.33236	43.619	●
PbANKA_09_v3	1426865	1428621	1757	1427382	142	46.1268	4.33236	43.619	●
PbANKA_09_v3	1453201	1454577	1377	1453807	142	46.1268	4.33236	43.619	●
PbANKA_12_v3	878810	881805	2996	880825	142	46.1268	4.33236	43.619	●
PbANKA_13_v3	2455530	2456626	1097	2456288	142	46.1268	4.33236	43.619	●
PbANKA_01_v3	437743	439072	1330	438494	127	41.673	4.34264	39.3509	●
PbANKA_10_v3	791003	791668	666	791315	120	39.5523	4.34402	37.3052	●
PbANKA_12_v3	1304576	1306774	2199	1306370	142	46.2876	4.34636	43.7734	●
PbANKA_04_v3	381565	382566	1002	382055	123	40.494	4.34667	38.2136	●
PbANKA_09_v3	830712	831813	1102	831433	141	46.0238	4.34998	43.5238	●
PbANKA_06_v3	132220	133949	1730	132586	140	45.7344	4.35138	43.2461	●
PbANKA_11_v3	110268	111156	889	110699	128	42.1132	4.35566	39.7737	●
PbANKA_13_v3	1619341	1619946	606	1619673	126	41.5468	4.36009	39.229	●
PbANKA_10_v3	1528486	1529005	520	1528729	130	42.8595	4.36844	40.4935	●
PbANKA_07_v3	670030	671372	1343	670684	142	46.5486	4.36913	44.0227	●
PbANKA_08_v3	597658	598709	1052	597969	141	46.4165	4.38453	43.8968	●
PbANKA_08_v3	391995	393099	1105	392289	136	44.9545	4.39164	42.502	●
PbANKA_09_v3	257129	258368	1240	257373	112	37.6188	4.39949	35.4362	●
PbANKA_12_v3	743372	744571	1200	744310	126	41.9497	4.39959	39.617	●
PbANKA_02_v3	170918	171452	535	171242	123	41.0349	4.40089	38.7342	●
PbANKA_10_v3	1540460	1541087	628	1540804	115	38.5604	4.40095	36.3462	●
PbANKA_13_v3	1353542	1354307	766	1353977	126	42.0836	4.41279	39.7456	●
PbANKA_04_v3	73086	74883	1798	74105	142	47.0498	4.41311	44.4977	●
PbANKA_07_v3	280272	281493	1222	280784	142	47.0498	4.41311	44.4977	●
PbANKA_09_v3	593509	594323	815	593961	142	47.0498	4.41311	44.4977	●
PbANKA_11_v3	499545	500766	1222	500283	142	47.0498	4.41311	44.4977	●
PbANKA_11_v3	614201	615470	1270	614823	142	47.0498	4.41311	44.4977	●
PbANKA_13_v3	498492	499224	733	498849	142	47.0498	4.41311	44.4977	●
PbANKA_13_v3	1684358	1685272	915	1684782	142	47.0498	4.41311	44.4977	●
PbANKA_14_v3	1484947	1487657	2711	1486079	142	47.0498	4.41311	44.4977
PbANKA_14_v3	1814430	1815985	1556	1815374	142	47.0498	4.41311	44.4977	●
PbANKA_12_v3	105708	106708	1001	106142	141	46.7469	4.41375	44.2122	●
PbANKA_09_v3	555202	556075	874	555586	138	45.8262	4.41464	43.3335	●
PbANKA_14_v3	1852489	1852909	421	1852692	125	41.8136	4.41678	39.4875	●
PbANKA_06_v3	399580	400320	741	399973	140	46.4843	4.418	43.961	●
PbANKA_08_v3	665844	667157	1314	666747	126	42.1429	4.41863	39.8028	●
PbANKA_06_v3	599694	600309	616	599939	137	45.6153	4.42369	43.1329	●
PbANKA_10_v3	576515	576974	460	576736	113	38.1653	4.42539	35.9646	●
PbANKA_13_v3	1149063	1149833	771	1149571	135	45.0388	4.4279	42.5827	●
PbANKA_11_v3	738011	738728	718	738302	136	45.3679	4.42954	42.8967	●
PbANKA_08_v3	852424	853978	1555	853266	142	47.2756	4.43302	44.7127	●
PbANKA_13_v3	1852383	1853014	632	1852779	116	39.1715	4.43312	36.9368	●
PbANKA_06_v3	442436	442935	500	442701	132	44.1813	4.43513	41.7631	●
PbANKA_14_v3	1066229	1066628	400	1066405	106	36.14	4.44331	34.0041	●
PbANKA_04_v3	79814	81429	1616	80338	141	47.1473	4.44933	44.5904	●
PbANKA_06_v3	710988	711903	916	711449	142	47.5435	4.45671	44.9665	●
PbANKA_09_v3	1133356	1133871	516	1133611	126	42.5867	4.46257	40.232	●
PbANKA_05_v3	98675	100010	1336	99414	142	47.6782	4.46866	45.0941	●
PbANKA_06_v3	149390	150934	1545	150548	133	44.9254	4.47588	42.4743	●
PbANKA_13_v3	2279690	2281124	1435	2280420	116	39.6604	4.48559	37.4091	●
PbANKA_09_v3	741234	741921	688	741528	119	40.635	4.48845	38.3494	●
PbANKA_12_v3	328895	329855	961	329385	142	47.9489	4.49274	45.3506	●
PbANKA_07_v3	309929	311580	1652	310569	142	47.9958	4.49692	45.392	●
PbANKA_09_v3	656726	658576	1851	657718	142	47.9958	4.49692	45.392	●
PbANKA_09_v3	1570969	1572146	1178	1571674	142	47.9958	4.49692	45.392	●
PbANKA_11_v3	251482	253064	1583	252561	142	47.9958	4.49692	45.392	●
PbANKA_12_v3	1700866	1701898	1033	1701411	142	47.9958	4.49692	45.392	●
PbANKA_01_v3	400472	401051	580	400789	137	46.5662	4.51102	44.0387	●
PbANKA_03_v3	560890	561942	1053	561418	142	48.2215	4.51708	45.608	●
PbANKA_07_v3	610354	610851	498	610602	119	40.9167	4.51816	38.6214	●
PbANKA_07_v3	312951	313851	901	313251	135	46.0545	4.5226	43.5533	●
PbANKA_06_v3	866654	867865	1212	867362	142	48.29	4.5232	45.6707	●
PbANKA_07_v3	591740	592918	1179	592209	142	48.3586	4.52934	45.7373	●
PbANKA_05_v3	126525	126971	447	126729	124	42.6589	4.53356	40.3002	●
PbANKA_06_v3	407301	407938	638	407631	135	46.1882	4.53517	43.6779	●
PbANKA_12_v3	138626	141153	2528	139534	142	48.4273	4.5355	45.8037	●
PbANKA_08_v3	1288663	1289859	1197	1289166	140	47.8379	4.53999	45.2467	●
PbANKA_08_v3	1031869	1032216	348	1032087	119	41.1313	4.54089	38.8285	●
PbANKA_12_v3	1074480	1074991	512	1074718	134	46.001	4.54771	43.5026	●
PbANKA_07_v3	612735	614258	1524	613450	142	48.565	4.54787	45.9326
PbANKA_14_v3	860658	861824	1167	861108	141	48.2894	4.55192	45.6704	●
PbANKA_14_v3	2306239	2306989	751	2306659	141	48.2894	4.55192	45.6704	●
PbANKA_08_v3	567264	567846	583	567499	125	43.1628	4.55226	40.7851	●
PbANKA_07_v3	406219	407019	801	406677	139	47.6745	4.55432	45.0908	●
PbANKA_14_v3	1782770	1784042	1273	1783423	142	48.6756	4.55782	46.0371	●
PbANKA_07_v3	749684	750564	881	750053	135	46.5383	4.5682	44.0129	●
PbANKA_11_v3	1416881	1418091	1211	1417548	142	48.8421	4.57282	46.1965	●
PbANKA_08_v3	701936	702712	777	702381	139	47.9146	4.5764	45.3176	●
PbANKA_05_v3	413074	414780	1707	413888	140	48.2535	4.57791	45.6374	●
PbANKA_12_v3	1048712	1050099	1388	1049356	142	48.9116	4.5791	46.2584	●
PbANKA_02_v3	85178	86407	1230	85590	142	48.9656	4.58397	46.3058	●
PbANKA_08_v3	839395	840200	806	839758	142	48.9656	4.58397	46.3058	●
PbANKA_09_v3	1509893	1513916	4024	1511079	142	48.9656	4.58397	46.3058	●
PbANKA_12_v3	1206037	1207349	1313	1206893	142	48.9656	4.58397	46.3058	●
PbANKA_12_v3	1219808	1221392	1585	1220505	142	48.9656	4.58397	46.3058	●
PbANKA_14_v3	756274	758042	1769	757346	142	48.9656	4.58397	46.3058	●
PbANKA_14_v3	2384530	2385913	1384	2385057	142	48.9656	4.58397	46.3058	●
PbANKA_11_v3	589646	590986	1341	590148	131	45.439	4.58652	42.9646	●
PbANKA_08_v3	982349	983891	1543	982714	119	41.5789	4.58853	39.2597	●
PbANKA_05_v3	415879	416393	515	416170	117	40.9344	4.5888	38.6388	●
PbANKA_09_v3	1364233	1365247	1015	1364910	121	42.2374	4.58976	39.8934	●
PbANKA_11_v3	220738	222985	2248	222413	140	48.3931	4.59069	45.7709	●
PbANKA_04_v3	199917	201252	1336	200868	142	49.0931	4.5955	46.4274	●
PbANKA_07_v3	579383	579924	542	579621	127	44.2408	4.59603	41.8202	●
PbANKA_12_v3	1228440	1231301	2862	1230159	142	49.1421	4.59994	46.4744	●
PbANKA_06_v3	869992	870539	548	870269	137	47.5741	4.60487	44.9958	●
PbANKA_13_v3	2010120	2011863	1744	2010959	140	48.7442	4.62296	46.1026	●
PbANKA_05_v3	471154	471860	707	471494	141	49.0732	4.62325	46.4081	●
PbANKA_14_v3	1506019	1506536	518	1506267	130	45.5247	4.62682	43.0456	●
PbANKA_13_v3	774363	775219	857	774915	135	47.1718	4.62838	44.6133	●
PbANKA_09_v3	862481	862977	497	862705	142	49.5222	4.63446	46.8326	●
PbANKA_03_v3	258495	259617	1123	258901	141	49.2754	4.64178	46.5958	●
PbANKA_06_v3	170552	172547	1996	171166	141	49.2754	4.64178	46.5958	●
PbANKA_08_v3	1159388	1160093	706	1159766	141	49.2754	4.64178	46.5958	●
PbANKA_14_v3	2414501	2415336	836	2414914	141	49.2754	4.64178	46.5958	●
PbANKA_03_v3	453752	454575	824	454057	138	48.2985	4.64223	45.6791	●
PbANKA_09_v3	937513	938023	511	937795	127	44.6997	4.64236	42.2574	●
PbANKA_13_v3	1219976	1221029	1054	1220558	142	49.6143	4.64284	46.9163	●
PbANKA_02_v3	87729	88703	975	88075	133	46.732	4.649	44.1977	●
PbANKA_04_v3	214734	216136	1403	215280	142	49.6852	4.64932	46.9838	●
PbANKA_14_v3	1225928	1226584	657	1226222	133	46.8042	4.65601	44.2658	●
PbANKA_01_v3	204240	205679	1440	204948	139	48.9083	4.66856	46.2555	●
PbANKA_11_v3	407782	408530	749	408088	139	48.9083	4.66856	46.2555	●
PbANKA_13_v3	2297077	2299820	2744	2299220	142	49.9346	4.67211	47.22	●
PbANKA_11_v3	1178419	1179634	1216	1179012	142	49.9603	4.67446	47.2394	●
PbANKA_05_v3	74640	75249	610	74973	119	42.4928	4.6869	40.1409	●
PbANKA_11_v3	1649747	1650364	618	1650015	130	46.1322	4.68716	43.6243	●
PbANKA_11_v3	773557	774673	1117	774078	142	50.1137	4.68853	47.3855	●
PbANKA_04_v3	358859	360135	1277	359416	140	49.5961	4.70191	46.8993	●
PbANKA_14_v3	896684	897657	974	897227	140	49.5961	4.70191	46.8993	●
PbANKA_14_v3	1817250	1817843	594	1817579	135	47.9566	4.70369	45.3581	●
PbANKA_05_v3	279062	279706	645	279448	132	47.0428	4.71173	44.4945	●
PbANKA_13_v3	766950	767830	881	767508	129	46.077	4.7149	43.5745	●
PbANKA_13_v3	534836	536416	1581	535285	142	50.4744	4.72172	47.7242	●
PbANKA_13_v3	47320	47786	467	47535	117	42.1846	4.72591	39.8437	●
PbANKA_14_v3	2027638	2028337	700	2028002	139	49.5612	4.72981	46.8698	●
PbANKA_10_v3	1143155	1144385	1231	1143760	141	50.287	4.73525	47.5459	●
PbANKA_06_v3	360358	362003	1646	361702	131	47.0713	4.7477	44.5187	●
PbANKA_10_v3	875744	877101	1358	876540	142	50.8311	4.75471	48.0564	●
PbANKA_12_v3	307200	307789	590	307506	140	50.1815	4.7567	47.4504	●
PbANKA_06_v3	811450	812719	1270	812254	142	50.8604	4.75742	48.0832	●
PbANKA_10_v3	604280	605054	775	604621	139	49.9285	4.76451	47.2141	●
PbANKA_02_v3	513399	514917	1519	514309	142	50.9808	4.7686	48.188	●
PbANKA_07_v3	170551	171750	1200	171217	142	50.9808	4.7686	48.188	●
PbANKA_08_v3	1090851	1092498	1648	1091859	142	50.9808	4.7686	48.188
PbANKA_10_v3	897052	899488	2437	898973	142	50.9808	4.7686	48.188	●
PbANKA_11_v3	1092795	1094793	1999	1093878	142	50.9808	4.7686	48.188	●
PbANKA_13_v3	587106	589028	1923	588024	142	50.9808	4.7686	48.188	●
PbANKA_13_v3	829939	831842	1904	830970	142	50.9808	4.7686	48.188	●
PbANKA_14_v3	855812	856886	1075	856403	142	50.9808	4.7686	48.188	●
PbANKA_11_v3	561178	562625	1448	561949	142	50.985	4.76898	48.1916	●
PbANKA_02_v3	358730	359843	1114	359163	139	50.0735	4.77826	47.3471	●
PbANKA_12_v3	1338512	1340004	1493	1339309	142	51.1837	4.78747	48.3782	●
PbANKA_13_v3	1189144	1189961	818	1189500	130	47.1333	4.78779	44.577	●
PbANKA_09_v3	336797	337677	881	337249	142	51.1984	4.78884	48.3919	●
PbANKA_10_v3	788336	789407	1072	788957	141	50.8628	4.78905	48.0854	●
PbANKA_08_v3	659735	661343	1609	660436	142	51.2501	4.79366	48.4401	●
PbANKA_12_v3	172929	174485	1557	173334	135	48.9081	4.79615	46.2555	●
PbANKA_09_v3	190303	191999	1697	191285	142	51.3019	4.79849	48.4891	●
PbANKA_13_v3	560726	561800	1075	561179	142	51.3537	4.80333	48.5313	●
PbANKA_08_v3	965548	966190	643	965880	140	50.7568	4.81098	47.9869	●
PbANKA_08_v3	1033215	1033686	472	1033455	120	43.9924	4.81383	41.581	●
PbANKA_11_v3	859015	860328	1314	859689	142	51.5022	4.8172	48.6708	●
PbANKA_14_v3	346366	347376	1011	346950	142	51.5022	4.8172	48.6708	●
PbANKA_06_v3	225283	225835	553	225567	129	47.0953	4.81844	44.5418	●
PbANKA_06_v3	190637	191691	1055	191176	142	51.532	4.81999	48.6992	●
PbANKA_05_v3	172559	173643	1085	173066	119	43.7092	4.82009	41.3097	●
PbANKA_09_v3	958833	960178	1346	959318	142	51.5766	4.82417	48.7408	●
PbANKA_14_v3	1369128	1370853	1726	1370115	142	51.5766	4.82417	48.7408	●
PbANKA_10_v3	953270	954537	1268	954014	141	51.2486	4.82534	48.4387	●
PbANKA_10_v3	1164794	1165544	751	1165081	141	51.2635	4.82674	48.4527	●
PbANKA_02_v3	146749	149207	2459	148784	142	51.6363	4.82976	48.7978	●
PbANKA_09_v3	329160	330369	1210	329689	141	51.3253	4.83257	48.5071	●
PbANKA_13_v3	998554	999395	842	998963	141	51.3253	4.83257	48.5071	●
PbANKA_13_v3	2281230	2282871	1642	2282366	141	51.3253	4.83257	48.5071	●
PbANKA_12_v3	960400	961130	731	960864	116	42.8154	4.83447	40.4512	●
PbANKA_04_v3	102049	102961	913	102741	130	47.6181	4.83706	45.036	●
PbANKA_10_v3	977866	980243	2378	979359	142	51.7484	4.84028	48.8989	●
PbANKA_06_v3	445692	447212	1521	446139	142	51.7708	4.84238	48.9197	●
PbANKA_09_v3	107258	108647	1390	107751	142	51.8008	4.8452	48.9467	●
PbANKA_07_v3	469938	470849	912	470297	140	51.2126	4.8543	48.4052	●
PbANKA_13_v3	652626	653357	732	652941	142	51.9509	4.85932	49.0911	●
PbANKA_07_v3	482197	485866	3670	484950	142	52.0262	4.86641	49.1564	●
PbANKA_05_v3	292806	294504	1699	293268	142	52.0283	4.86661	49.1564	●
PbANKA_05_v3	561687	564055	2369	562715	142	52.0283	4.86661	49.1564	●
PbANKA_12_v3	1153915	1154870	956	1154350	142	52.0283	4.86661	49.1564	●
PbANKA_14_v3	1985241	1986687	1447	1985921	142	52.0283	4.86661	49.1564	●
PbANKA_13_v3	1790269	1791215	947	1790886	137	50.3121	4.86668	47.5692	●
PbANKA_03_v3	353420	355012	1593	354081	142	52.0413	4.86783	49.1681	●
PbANKA_07_v3	788971	791712	2742	790618	141	51.7437	4.87219	48.8946	●
PbANKA_10_v3	1315514	1317353	1840	1316220	142	52.2529	4.8878	49.3629	●
PbANKA_09_v3	1204104	1204647	544	1204353	124	46.0602	4.88955	43.5588	●
PbANKA_01_v3	187808	188337	530	188059	135	49.8841	4.89232	47.1751	●
PbANKA_06_v3	106049	106757	709	106469	140	51.6823	4.89923	48.8377	●
PbANKA_08_v3	949982	951292	1311	950414	140	51.6823	4.89923	48.8377	●
PbANKA_13_v3	280640	281308	669	280946	134	49.6099	4.89943	46.9125	●
PbANKA_01_v3	275163	275637	475	275398	134	49.6404	4.90248	46.9408	●
PbANKA_12_v3	973459	974866	1408	974390	141	52.1611	4.91193	49.2769	●
PbANKA_09_v3	641283	642491	1209	641948	142	52.5572	4.91663	49.641	●
PbANKA_12_v3	860038	860555	518	860229	127	47.3947	4.92106	44.8255	●
PbANKA_12_v3	1443074	1444696	1623	1444305	133	49.5043	4.92366	46.8154	●
PbANKA_14_v3	632658	635054	2397	633980	142	52.6336	4.92389	49.7141	●
PbANKA_14_v3	2073355	2074481	1127	2073878	142	52.6336	4.92389	49.7141	●
PbANKA_07_v3	679264	680958	1695	680077	141	52.3063	4.92582	49.4132	●
PbANKA_12_v3	189977	190779	803	190335	140	51.9791	4.92777	49.1175	●
PbANKA_09_v3	64962	66065	1104	65608	141	52.3916	4.93398	49.4882	●
PbANKA_11_v3	1154505	1155753	1249	1154757	141	52.3916	4.93398	49.4882	●
PbANKA_13_v3	648851	650039	1189	649473	141	52.3916	4.93398	49.4882	●
PbANKA_14_v3	1163518	1164700	1183	1164299	142	52.7869	4.93847	49.8521	●
PbANKA_14_v3	1168793	1170701	1909	1169460	142	52.7869	4.93847	49.8521	●
PbANKA_06_v3	792183	793998	1816	793334	142	52.8099	4.94066	49.8726	●
PbANKA_11_v3	1560959	1562790	1832	1561726	137	51.1129	4.9452	48.3111	●
PbANKA_07_v3	369144	371627	2484	370495	142	52.8637	4.94579	49.9184	●
PbANKA_11_v3	1156424	1157296	873	1156929	142	52.9099	4.9502	49.9617	●
PbANKA_06_v3	371537	372903	1367	372190	142	52.9408	4.95314	49.9902	●
PbANKA_09_v3	187317	188155	839	187694	142	52.9408	4.95314	49.9902	●
PbANKA_14_v3	1974174	1975950	1777	1974953	142	53.0952	4.96789	50.1335	●
PbANKA_13_v3	1161059	1162314	1256	1161531	142	53.1039	4.96873	50.1335	●
PbANKA_13_v3	1812472	1813410	939	1812971	142	53.1039	4.96873	50.1335	●
PbANKA_14_v3	332022	333313	1292	332474	142	53.1039	4.96873	50.1335	●
PbANKA_14_v3	717456	719039	1584	718415	142	53.1039	4.96873	50.1335	●
PbANKA_14_v3	1428588	1429531	944	1429151	142	53.1039	4.96873	50.1335	●
PbANKA_07_v3	636811	637584	774	637193	141	52.7684	4.97017	49.8353	●
PbANKA_04_v3	46846	47570	725	47213	139	52.0759	4.97104	49.1976	●
PbANKA_12_v3	553663	554771	1109	554226	142	53.227	4.98051	50.2441	●
PbANKA_06_v3	135140	136029	890	135535	137	51.4923	4.98272	48.6619	●
PbANKA_05_v3	490325	491118	794	490838	134	50.4733	4.98633	47.7233	●
PbANKA_03_v3	53528	54896	1369	54378	142	53.328	4.99019	50.3368	●
PbANKA_07_v3	141201	142495	1295	141882	142	53.4059	4.99767	50.4093	●
PbANKA_11_v3	1610141	1611799	1659	1610908	142	53.4059	4.99767	50.4093	●
PbANKA_05_v3	730339	731183	845	730653	142	53.4371	5.00067	50.4396	●
PbANKA_04_v3	262543	263082	540	262824	134	50.6373	5.00297	47.8748	●
PbANKA_07_v3	164868	166133	1266	165515	139	52.4342	5.0061	49.5284	●
PbANKA_11_v3	739796	740418	623	740136	140	52.7997	5.00731	49.8641	●
PbANKA_08_v3	1061608	1062855	1248	1061857	128	48.5636	5.00768	45.9316	●
PbANKA_07_v3	348184	349272	1089	348783	142	53.5543	5.01194	50.5429	●
PbANKA_13_v3	2394647	2395630	984	2395128	142	53.57	5.01345	50.5547	●
PbANKA_06_v3	789231	790561	1331	789923	142	53.5935	5.01571	50.5763	●
PbANKA_11_v3	895765	896668	904	896206	142	53.617	5.01797	50.5972	●
PbANKA_12_v3	295121	296554	1434	295649	142	53.6405	5.02024	50.6173	●
PbANKA_12_v3	449262	450529	1268	449856	142	53.6405	5.02024	50.6173	●
PbANKA_14_v3	1384642	1386660	2019	1385861	142	53.6405	5.02024	50.6173	●
PbANKA_14_v3	2394478	2395712	1235	2395126	142	53.664	5.02251	50.6395	●
PbANKA_05_v3	465312	466358	1047	465840	137	51.9147	5.02472	49.0564	●
PbANKA_09_v3	1376646	1378985	2340	1377653	142	53.719	5.02781	50.6874	●
PbANKA_11_v3	462522	464340	1819	462974	142	53.719	5.02781	50.6874	●
PbANKA_13_v3	89557	91999	2443	91336	142	53.719	5.02781	50.6874	●
PbANKA_04_v3	459954	460726	773	460282	127	48.4316	5.03137	45.8078	●
PbANKA_06_v3	864282	865139	858	864468	142	53.837	5.0392	50.7977	●
PbANKA_03_v3	55950	56989	1040	56373	138	52.4365	5.04131	49.5289	●
PbANKA_09_v3	1308728	1309795	1068	1309209	138	52.4537	5.04303	49.5448	●
PbANKA_12_v3	1046590	1047076	487	1046808	135	51.4915	5.05368	48.6612	●
PbANKA_11_v3	544086	545384	1299	544646	142	54.1535	5.06985	51.0893	●
PbANKA_02_v3	322953	325197	2245	324431	142	54.2089	5.07522	51.1274	●
PbANKA_05_v3	892113	893737	1625	893196	142	54.2089	5.07522	51.1274
PbANKA_06_v3	305300	306176	877	305832	142	54.2089	5.07522	51.1274	●
PbANKA_14_v3	1909328	1910822	1495	1909943	142	54.2089	5.07522	51.1274	●
PbANKA_14_v3	233696	234582	887	234205	139	53.1589	5.07758	50.1818	●
PbANKA_09_v3	1186979	1187733	755	1187370	136	52.1088	5.08004	49.2273	●
PbANKA_07_v3	784923	786398	1476	785337	142	54.3605	5.08996	51.2629	●
PbANKA_08_v3	441922	442595	674	442262	138	52.9385	5.09134	49.9885	●
PbANKA_05_v3	725660	727271	1612	726575	141	54.0269	5.09245	50.9718	●
PbANKA_04_v3	483780	485180	1401	484547	142	54.4324	5.09696	51.324	●
PbANKA_09_v3	216905	218068	1164	217691	142	54.4324	5.09696	51.324	●
PbANKA_13_v3	1501111	1503673	2563	1502698	142	54.4324	5.09696	51.324	●
PbANKA_07_v3	504482	505096	615	504789	123	47.6074	5.09752	45.0279	●
PbANKA_07_v3	763608	765390	1783	764334	142	54.5124	5.10477	51.3956	●
PbANKA_11_v3	1343258	1345615	2358	1344823	142	54.5124	5.10477	51.3956	●
PbANKA_09_v3	375002	376619	1618	375954	142	54.5284	5.10633	51.4109	●
PbANKA_05_v3	882114	882779	666	882424	132	50.9378	5.1074	48.1559	●
PbANKA_09_v3	996605	998936	2332	997904	142	54.5926	5.11259	51.4697	●
PbANKA_12_v3	1638168	1639420	1253	1638804	142	54.6328	5.11651	51.502	●
PbANKA_04_v3	638250	638756	507	638494	127	49.2553	5.12026	46.5789	●
PbANKA_05_v3	878629	880442	1814	879584	142	54.673	5.12044	51.5366	●
PbANKA_14_v3	1748698	1749635	938	1749165	141	54.3236	5.12159	51.2307	●
PbANKA_10_v3	225168	226786	1619	225994	142	54.8019	5.13305	51.6517	●
PbANKA_08_v3	1107258	1107761	504	1107490	141	54.4445	5.1335	51.335	●
PbANKA_14_v3	1137857	1138481	625	1138280	121	47.2325	5.13663	44.6722	●
PbANKA_13_v3	1879635	1881340	1706	1880617	142	54.8503	5.1378	51.6948
PbANKA_02_v3	326715	328347	1633	327484	142	54.8665	5.13938	51.7093	●
PbANKA_10_v3	1394071	1395483	1413	1394709	142	54.8665	5.13938	51.7093	●
PbANKA_13_v3	1430341	1431332	992	1430770	140	54.1842	5.14359	51.1181	●
PbANKA_07_v3	512040	513093	1054	512586	141	54.6129	5.15012	51.4831
PbANKA_10_v3	1116860	1118713	1854	1117634	142	54.996	5.15208	51.8286	●
PbANKA_07_v3	766123	767851	1729	766909	142	55.0933	5.16165	51.9112	●
PbANKA_11_v3	1586899	1587468	570	1587218	132	51.4672	5.16296	48.6379	●
PbANKA_11_v3	758091	760057	1967	759311	142	55.2154	5.17366	52.0194	●
PbANKA_14_v3	247273	248476	1204	247745	140	54.493	5.17435	51.3798	●
PbANKA_14_v3	1932644	1934369	1726	1933639	142	55.2398	5.17607	52.0412	●
PbANKA_11_v3	1558469	1560109	1641	1559375	142	55.2806	5.18009	52.0779	●
PbANKA_09_v3	735482	737513	2032	736433	142	55.3215	5.18412	52.1137	●
PbANKA_05_v3	643121	644084	964	643612	142	55.3445	5.18639	52.1208	●
PbANKA_09_v3	180846	181963	1118	181306	142	55.3445	5.18639	52.1208	●
PbANKA_13_v3	768723	771600	2878	770451	142	55.3445	5.18639	52.1208	●
PbANKA_14_v3	2232490	2234550	2061	2233760	142	55.3445	5.18639	52.1208	●
PbANKA_13_v3	1244276	1245387	1112	1244968	141	55.0462	5.19307	51.8696	●
PbANKA_04_v3	365624	367102	1479	366169	142	55.4442	5.19623	52.2105	●
PbANKA_13_v3	2233233	2234051	819	2233540	141	55.079	5.19633	51.8989	●
PbANKA_08_v3	694518	696126	1609	695171	136	53.2858	5.20021	50.2982	●
PbANKA_14_v3	1285532	1286801	1270	1286053	142	55.4852	5.20028	52.2431	●
PbANKA_11_v3	927896	928748	853	928358	133	52.2013	5.20177	49.315	●
PbANKA_08_v3	904441	905456	1016	904852	142	55.5098	5.20272	52.2654	●
PbANKA_07_v3	418573	419182	610	418801	134	52.7285	5.21857	49.8019	●
PbANKA_11_v3	306041	308634	2594	307548	142	55.6743	5.219	52.4114	●
PbANKA_12_v3	1498109	1501300	3192	1498912	142	55.7073	5.22227	52.4382	●
PbANKA_12_v3	1086228	1087556	1329	1086801	142	55.732	5.22472	52.4551	●
PbANKA_11_v3	1458782	1460053	1272	1459377	142	55.765	5.228	52.4835	●
PbANKA_12_v3	707566	709011	1446	708196	142	55.8146	5.23292	52.5185	●
PbANKA_12_v3	1395326	1396463	1138	1395999	142	55.8146	5.23292	52.5185	●
PbANKA_12_v3	939273	940569	1297	940225	142	55.8229	5.23374	52.5262	●
PbANKA_13_v3	1124743	1125995	1253	1125261	142	55.9969	5.25105	52.6824	●
PbANKA_01_v3	254552	255953	1402	254927	129	51.2021	5.25252	48.3955	●
PbANKA_09_v3	278733	279445	713	279127	139	54.927	5.25507	51.7646	●
PbANKA_06_v3	296335	297515	1181	296868	142	56.1383	5.26514	52.8061	●
PbANKA_02_v3	202388	204122	1735	203198	141	55.7706	5.26545	52.4835	●
PbANKA_13_v3	2424690	2426293	1604	2425278	141	55.7706	5.26545	52.4835	●
PbANKA_10_v3	85139	86323	1185	85781	141	55.8235	5.27076	52.5262	●
PbANKA_14_v3	1481471	1482881	1411	1482402	141	55.8235	5.27076	52.5262	●
PbANKA_11_v3	752216	753954	1739	753220	142	56.2301	5.2743	52.8796	●
PbANKA_13_v3	548226	550784	2559	548979	142	56.3221	5.28349	52.96	●
PbANKA_10_v3	1483989	1486438	2450	1484482	142	56.4142	5.29271	53.0416	●
PbANKA_08_v3	1099746	1101539	1794	1101152	142	56.4814	5.29944	53.1023	●
PbANKA_13_v3	1817267	1818473	1207	1818114	142	56.4814	5.29944	53.1023	●
PbANKA_06_v3	462061	464247	2187	463507	142	56.5122	5.30253	53.1134	●
PbANKA_06_v3	826014	827429	1416	826700	142	56.5122	5.30253	53.1134	●
PbANKA_07_v3	145010	146826	1817	145871	142	56.5122	5.30253	53.1134	●
PbANKA_09_v3	1073213	1075250	2038	1073958	142	56.5122	5.30253	53.1134	●
PbANKA_14_v3	261125	262482	1358	261835	142	56.5122	5.30253	53.1134	●
PbANKA_12_v3	1253412	1254200	789	1253766	140	55.7856	5.30456	52.4953	●
PbANKA_08_v3	146565	147519	955	147073	142	56.6329	5.31464	53.2231	●
PbANKA_08_v3	394554	395401	848	395127	136	54.4227	5.31823	51.3183	●
PbANKA_13_v3	2308573	2309276	704	2308912	140	55.9797	5.32431	52.6677	●
PbANKA_14_v3	2274706	2277480	2775	2276300	142	56.7342	5.32483	53.3118
PbANKA_01_v3	427371	429808	2438	428247	142	56.785	5.32993	53.3565	●
PbANKA_13_v3	1258822	1260021	1200	1259757	132	53.1227	5.3395	50.1512	●
PbANKA_14_v3	610005	611421	1417	610745	142	56.9886	5.35045	53.5188	●
PbANKA_07_v3	232033	233729	1697	232816	142	57.0567	5.35733	53.5789	●
PbANKA_07_v3	235143	236359	1217	235797	142	57.0652	5.35819	53.5867	●
PbANKA_05_v3	792463	793374	912	792884	141	56.7178	5.3612	53.2983	●
PbANKA_11_v3	969907	971588	1682	971152	142	57.2188	5.37373	53.7164	●
PbANKA_02_v3	134405	135542	1138	134949	141	56.8974	5.37949	53.4503	●
PbANKA_12_v3	1102025	1104186	2162	1102724	142	57.2873	5.38067	53.776	●
PbANKA_12_v3	313079	314177	1099	313652	142	57.3216	5.38414	53.8074	●
PbANKA_11_v3	238182	239647	1466	238889	141	56.9659	5.38649	53.5013	●
PbANKA_09_v3	1075995	1077801	1807	1077526	139	56.2633	5.39219	52.9063	●
PbANKA_14_v3	89246	90429	1184	89896	142	57.4159	5.39372	53.8875	●
PbANKA_07_v3	295292	296594	1303	295931	138	55.9423	5.39825	52.6328	●
PbANKA_06_v3	774161	774964	804	774547	142	57.502	5.40246	53.9575	●
PbANKA_11_v3	581706	583154	1449	582778	131	53.4371	5.41494	50.4396	●
PbANKA_04_v3	264616	265938	1323	265201	142	57.7135	5.42399	54.1216	●
PbANKA_08_v3	1081170	1085952	4783	1081834	142	57.7135	5.42399	54.1216	●
PbANKA_09_v3	62279	63850	1572	62776	142	57.7135	5.42399	54.1216	●
PbANKA_11_v3	365939	367205	1267	366737	142	57.7135	5.42399	54.1216	●
PbANKA_13_v3	247925	248831	907	248275	142	57.7135	5.42399	54.1216	●
PbANKA_13_v3	1389525	1391003	1479	1390162	142	57.7135	5.42399	54.1216	●
PbANKA_09_v3	78880	80457	1578	79278	135	55.1532	5.43562	51.966	●
PbANKA_14_v3	1423926	1425634	1709	1424533	142	57.9346	5.44657	54.315	●
PbANKA_13_v3	1998341	1999978	1638	1998993	142	58.2138	5.47519	54.5487	●
PbANKA_05_v3	828233	829395	1163	828710	142	58.2927	5.48329	54.6188	●
PbANKA_01_v3	110648	111419	772	111051	142	58.3717	5.49141	54.6882	●
PbANKA_14_v3	458200	459825	1626	458897	142	58.5478	5.50956	54.8272	●
PbANKA_13_v3	2413149	2414245	1097	2413711	141	58.1877	5.51233	54.5268	●
PbANKA_04_v3	645722	647923	2202	646482	142	58.6362	5.51867	54.8999	●
PbANKA_13_v3	726336	727931	1596	727039	142	58.6362	5.51867	54.8999	●
PbANKA_09_v3	1391802	1392974	1173	1392496	142	58.7335	5.52874	54.9836	●
PbANKA_06_v3	533468	535148	1681	534553	142	58.8134	5.537	55.0472	●
PbANKA_04_v3	93156	94957	1802	93994	142	58.9499	5.55115	55.151	●
PbANKA_06_v3	512409	513676	1268	512964	142	58.9499	5.55115	55.151	●
PbANKA_11_v3	274418	275471	1054	274876	142	58.9499	5.55115	55.151	●
PbANKA_13_v3	805146	806439	1294	805983	142	58.9499	5.55115	55.151	●
PbANKA_13_v3	776102	777025	924	776611	139	57.8584	5.55928	54.2476	●
PbANKA_12_v3	1724693	1726539	1847	1725387	142	59.188	5.57588	55.3661	●
PbANKA_12_v3	1250694	1251449	756	1251132	142	59.1969	5.57681	55.3687	●
PbANKA_13_v3	1522306	1524321	2016	1523552	142	59.2597	5.58335	55.4207	●
PbANKA_14_v3	1430757	1432769	2013	1431707	142	59.3495	5.59271	55.5015	●
PbANKA_11_v3	1230670	1231443	774	1231006	140	58.7691	5.61429	55.011	●
PbANKA_13_v3	2043183	2044278	1096	2043710	141	59.3941	5.6387	55.5423	●
PbANKA_14_v3	589862	591187	1326	590414	142	59.856	5.64573	55.9363	●
PbANKA_08_v3	1361584	1361767	184	1361631	32	16.3965	5.65911	14.7349	●
PbANKA_11_v3	520379	522209	1831	521510	142	59.9928	5.6601	56.044	●
PbANKA_13_v3	1993449	1994565	1117	1993944	141	59.7225	5.67348	55.8238	●
PbANKA_04_v3	662624	663888	1265	663092	142	60.2234	5.68441	56.2047	●
PbANKA_14_v3	1211867	1213060	1194	1212374	142	60.8967	5.75583	56.7913	●
PbANKA_02_v3	154917	156316	1400	155484	142	60.9713	5.76379	56.8464	●
PbANKA_13_v3	2209492	2210664	1173	2210186	142	60.9993	5.76678	56.8641	●
PbANKA_13_v3	2038572	2039753	1182	2039263	141	60.7795	5.78649	56.6974	●
PbANKA_06_v3	259309	260754	1446	260042	142	61.3747	5.80694	57.1962	●
PbANKA_10_v3	1434202	1435352	1151	1434685	142	61.4974	5.82012	57.298	●
PbANKA_14_v3	508252	510719	2468	508766	142	61.5825	5.82927	57.3421	●
PbANKA_08_v3	323	393	71	347	19	11.7218	5.8554	10.1787
PbANKA_08_v3	13328	13482	155	13418	76	35.0202	5.88763	32.917	●
PbANKA_12_v3	1293411	1297431	4021	1296562	141	61.8726	5.90514	57.5929	●
PbANKA_05_v3	176311	177848	1538	176908	142	62.88	5.97015	58.4595	●
PbANKA_10_v3	139141	140213	1073	139770	142	63.1736	6.00238	58.6518	●
PbANKA_13_v3	57542	59167	1626	58137	142	63.2031	6.00563	58.6518	●
PbANKA_08_v3	987183	988392	1210	987841	141	63.4907	6.08415	58.8348	●
PbANKA_10_v3	837826	838788	963	838361	140	63.1551	6.09392	58.6457	●
PbANKA_08_v3	480944	482358	1415	481734	142	64.9061	6.19528	59.706	●
PbANKA_13_v3	1396677	1398373	1697	1397526	142	64.9367	6.19874	59.706	●
PbANKA_09_v3	91750	92675	926	92372	142	65.3164	6.24166	59.9498	●
PbANKA_09_v3	472351	473593	1243	472899	142	67.3187	6.47179	60.2109	●

## Sheet: 2e
Supplementary file 2e. Peaks identified in ChIP-seq of sAP2-FG <Exp 1>
chr	start	end	length	abs_summit	pileup	-log10(p-value)	fold_enrichment	-log10(q-value)	common
PbANKA_01_v3	137664	140522	2859	138384	454	281.091	9.90679	277.842	●
PbANKA_01_v3	145137	146768	1632	146179	241	88.0587	4.98443	85.7424	●
PbANKA_01_v3	165065	165842	778	165500	252	82.4553	4.48051	80.1687	●
PbANKA_01_v3	195067	196623	1557	196034	310	142.071	6.47496	139.481	●
PbANKA_01_v3	254526	256646	2121	255694	466	260.83	8.53607	257.685	●
PbANKA_01_v3	284683	285612	930	285018	271	88.9033	4.5029	86.5825	●
PbANKA_01_v3	293183	294444	1262	293997	338	139.706	5.75616	137.129	●
PbANKA_01_v3	360933	364359	3427	362842	552	329.123	9.4083	325.529	●
PbANKA_01_v3	408968	410433	1466	409588	201	49.9802	3.51263	47.9259	●
PbANKA_01_v3	437590	438876	1287	437931	164	33.8731	3.04288	31.9848
PbANKA_01_v3	440246	441914	1669	440587	248	80.5326	4.44607	78.2571	●
PbANKA_01_v3	454602	456453	1852	455502	220	52.5371	3.41728	50.4589
PbANKA_01_v3	462659	464298	1640	463568	381	174.166	6.49904	171.42	●
PbANKA_02_v3	73130	74657	1528	73750	363	140.335	5.36029	137.754	●
PbANKA_02_v3	114214	115285	1072	114938	232	72.0975	4.25889	69.8731	●
PbANKA_02_v3	146832	149165	2334	147294	230	69.509	4.15208	67.3015	●
PbANKA_02_v3	158043	158671	629	158324	182	41.7959	3.29478	39.8207
PbANKA_02_v3	180412	181086	675	180760	233	64.4351	3.8479	62.2616
PbANKA_02_v3	202679	203683	1005	203224	196	58.1632	4.0595	56.0376	●
PbANKA_02_v3	213441	214133	693	213874	153	34.9647	3.25718	33.0632	●
PbANKA_02_v3	219125	220061	937	219567	191	47.5652	3.50947	45.5341	●
PbANKA_02_v3	221686	222700	1015	222210	301	121.032	5.56147	118.554	●
PbANKA_02_v3	255463	256377	915	256102	200	61.8571	4.2152	59.7023	●
PbANKA_02_v3	277802	279173	1372	278700	156	32.0874	3.02733	30.2216
PbANKA_02_v3	290420	292342	1923	291341	544	373.375	11.7657	369.09	●
PbANKA_02_v3	309930	311478	1549	310649	319	132.219	5.7634	129.683	●
PbANKA_02_v3	324170	324850	681	324474	181	50.8839	3.86167	48.8213	●
PbANKA_02_v3	362466	363549	1084	362913	219	72.9292	4.5313	70.6998	●
PbANKA_02_v3	411803	412448	646	412130	177	40.3437	3.27285	38.383	●
PbANKA_02_v3	496985	497958	974	497700	166	44.5249	3.69941	42.5233	●
PbANKA_02_v3	506195	507212	1018	506501	156	41.0866	3.63418	39.1185	●
PbANKA_02_v3	550160	551190	1031	550953	186	42.4849	3.28479	40.5028
PbANKA_02_v3	560464	561243	780	560793	268	81.482	4.197	79.2012	●
PbANKA_03_v3	37432	38024	593	37698	155	34.6769	3.2095	32.7788
PbANKA_03_v3	43005	44137	1133	43479	320	149.77	6.65115	147.14	●
PbANKA_03_v3	56575	56992	418	56786	139	30.567	3.15296	28.7215
PbANKA_03_v3	74192	74708	517	74448	172	39.9576	3.31473	38.001
PbANKA_03_v3	117036	118742	1707	117782	347	153.428	6.22663	150.782	●
PbANKA_03_v3	167245	167971	727	167620	187	61.5334	4.44934	59.3811	●
PbANKA_03_v3	172973	174587	1615	173807	363	186.964	7.55205	184.149	●
PbANKA_03_v3	188402	188931	530	188680	179	42.0371	3.34732	40.0594	●
PbANKA_03_v3	238863	239396	534	239117	206	60.1879	4.01328	58.0462	●
PbANKA_03_v3	242278	243840	1563	243407	239	53.1257	3.25059	51.0424	●
PbANKA_03_v3	341698	342696	999	342237	234	74.7148	4.3673	72.4748	●
PbANKA_03_v3	358976	359628	653	359260	208	54.7394	3.67871	52.6419	●
PbANKA_03_v3	416230	416984	755	416474	172	40.3018	3.33585	38.3415
PbANKA_03_v3	422039	423163	1125	422550	242	76.7325	4.34474	74.4809	●
PbANKA_03_v3	425192	426928	1737	425895	439	261.584	9.3359	258.436	●
PbANKA_03_v3	437459	439840	2382	439536	179	46.4138	3.61254	44.3937	●
PbANKA_03_v3	463267	464650	1384	464262	269	91.8167	4.6763	89.4818	●
PbANKA_03_v3	495389	496264	876	495736	166	41.3003	3.48529	39.3299	●
PbANKA_03_v3	498085	499134	1050	498768	227	71.2711	4.29528	69.0521	●
PbANKA_03_v3	536535	537334	800	536943	236	62.4232	3.71111	60.2641	●
PbANKA_03_v3	539600	540854	1255	540088	249	77.2155	4.26168	74.9608	●
PbANKA_03_v3	540995	544086	3092	542303	294	126.244	5.98349	123.739	●
PbANKA_03_v3	548994	550839	1846	549906	318	140.434	6.19972	137.852	●
PbANKA_03_v3	553259	555438	2180	554944	172	37.8309	3.18588	35.8969
PbANKA_04_v3	50738	52506	1769	51505	458	239.324	7.75537	236.277	●
PbANKA_04_v3	75860	76807	948	76252	178	40.2823	3.25664	38.3224	●
PbANKA_04_v3	97757	99835	2079	98935	399	215.771	8.09397	212.834	●
PbANKA_04_v3	102134	102687	554	102410	154	37.5651	3.42045	35.6341	●
PbANKA_04_v3	105629	107373	1745	106051	209	53.5416	3.60109	51.4543	●
PbANKA_04_v3	116417	117486	1070	116728	205	70.7919	4.67954	68.5761	●
PbANKA_04_v3	121410	122496	1087	122202	149	33.7355	3.23102	31.8488	●
PbANKA_04_v3	139230	140424	1195	139628	243	79.8647	4.49338	77.5933	●
PbANKA_04_v3	147107	148562	1456	147428	175	42.9364	3.45639	40.9498	●
PbANKA_04_v3	163544	164370	827	164000	156	35.0199	3.21838	33.1178	●
PbANKA_04_v3	171636	172680	1045	172152	160	35.6514	3.20505	33.742
PbANKA_04_v3	185062	185828	767	185370	244	84.4613	4.72418	82.1641	●
PbANKA_04_v3	244880	246615	1736	245886	259	78.4277	4.17707	76.1655	●
PbANKA_04_v3	276683	277916	1234	277272	446	229.807	7.6049	226.808	●
PbANKA_04_v3	310186	312274	2089	311395	555	346.906	10.1156	343.142	●
PbANKA_04_v3	366109	367529	1421	366408	259	100.148	5.30217	97.7699	●
PbANKA_04_v3	381454	382575	1122	382106	205	57.6044	3.88083	55.4833	●
PbANKA_04_v3	387623	388037	415	387797	236	56.1709	3.4171	54.0615
PbANKA_04_v3	393391	393916	526	393664	199	48.8185	3.4748	46.7754	●
PbANKA_04_v3	417219	418918	1700	418478	254	62.9173	3.5316	60.7546	●
PbANKA_04_v3	474878	476319	1442	475341	277	98.3	4.86436	95.9316	●
PbANKA_04_v3	479547	481036	1490	480601	287	112.261	5.38813	109.824	●
PbANKA_04_v3	484290	484855	566	484607	196	51.6473	3.67372	49.5776	●
PbANKA_04_v3	570877	573588	2712	573055	352	173.884	7.14293	171.139	●
PbANKA_04_v3	620244	620955	712	620657	261	100.883	5.30155	98.5008	●
PbANKA_04_v3	653059	653839	781	653453	386	179.298	6.63	176.523	●
PbANKA_04_v3	699246	699969	724	699621	230	70.2422	4.19117	68.0299	●
PbANKA_05_v3	94727	96050	1324	95715	152	31.6183	3.04688	29.7586
PbANKA_05_v3	98577	99113	537	98834	195	39.0611	3.00208	37.1141	●
PbANKA_05_v3	109449	110345	897	110007	156	32.46	3.05127	30.5894
PbANKA_05_v3	139493	141017	1525	140017	300	138.713	6.53727	136.141	●
PbANKA_05_v3	143171	144111	941	143720	222	72.298	4.43929	70.0723	●
PbANKA_05_v3	172567	173600	1034	173062	325	142.211	6.13755	139.62	●
PbANKA_05_v3	212454	213815	1362	213333	201	51.148	3.57659	49.0828	●
PbANKA_05_v3	259269	260297	1029	259494	215	44.1951	3.06605	42.1966	●
PbANKA_05_v3	273085	273747	663	273408	228	52.7367	3.34096	50.6566
PbANKA_05_v3	292948	293799	852	293264	178	42.1958	3.37	40.2165
PbANKA_05_v3	301582	302144	563	301827	163	33.8666	3.05438	31.9783	●
PbANKA_05_v3	345127	346100	974	345521	224	67.7716	4.15203	65.5753	●
PbANKA_05_v3	346833	347843	1011	347385	367	149.377	5.6719	146.749	●
PbANKA_05_v3	363285	363788	504	363543	210	49.0911	3.35737	47.0454	●
PbANKA_05_v3	393982	394546	565	394290	214	73.2366	4.64732	71.0058	●
PbANKA_05_v3	457494	458253	760	457759	237	84.7	4.87074	82.4011	●
PbANKA_05_v3	464579	466544	1966	465518	354	185.744	7.73531	182.935	●
PbANKA_05_v3	483002	484183	1182	483570	185	40.1294	3.16445	38.171
PbANKA_05_v3	491634	494389	2756	492206	215	61.5128	3.94816	59.3607
PbANKA_05_v3	500478	502188	1711	500957	369	197.021	7.93233	194.162	●
PbANKA_05_v3	516402	517447	1046	516752	194	51.381	3.68728	49.3137	●
PbANKA_05_v3	524023	526003	1981	525216	325	146.08	6.33576	143.469	●
PbANKA_05_v3	547438	549608	2171	548295	529	308.211	9.07985	304.78	●
PbANKA_05_v3	559070	563778	4709	560403	552	383.569	12.0194	378.647	●
PbANKA_05_v3	590640	591615	976	591073	371	150.739	5.66253	148.105	●
PbANKA_05_v3	597126	598088	963	597744	310	142.636	6.50626	140.043	●
PbANKA_05_v3	603084	603698	615	603347	178	42.6891	3.39959	40.705
PbANKA_05_v3	605445	606109	665	605720	182	41.6775	3.28794	39.7035	●
PbANKA_05_v3	648980	651687	2708	650411	558	400.165	12.695	392.955	●
PbANKA_05_v3	687855	688354	500	688112	138	29.9284	3.12101	28.0916
PbANKA_05_v3	692042	693079	1038	692438	191	58.9074	4.19603	56.7757	●
PbANKA_05_v3	707412	708053	642	707678	171	44.7217	3.62983	42.7181	●
PbANKA_05_v3	796650	797404	755	797072	146	32.7528	3.2063	30.8783
PbANKA_05_v3	802188	802974	787	802692	249	100.055	5.51826	97.6772	●
PbANKA_05_v3	845893	847380	1488	846495	300	136.68	6.42124	134.12	●
PbANKA_05_v3	851293	852186	894	851793	223	74.4116	4.5434	72.1732	●
PbANKA_05_v3	869460	870693	1234	869692	162	38.2446	3.34534	36.3062	●
PbANKA_05_v3	878791	880292	1502	879977	240	89.4465	5.08599	87.1228	●
PbANKA_05_v3	895303	897246	1944	895974	385	184.701	6.90152	181.897	●
PbANKA_06_v3	94342	94859	518	94543	208	64.2835	4.21937	62.1112	●
PbANKA_06_v3	108042	108857	816	108395	176	48.3827	3.78528	46.3438
PbANKA_06_v3	130526	131895	1370	131483	246	90.887	5.04538	88.5562	●
PbANKA_06_v3	150766	154428	3663	151976	370	179.462	6.98925	176.687	●
PbANKA_06_v3	175362	176834	1473	176566	179	36.3691	3.02056	34.4515
PbANKA_06_v3	225999	227817	1819	226895	224	83.1722	5.05199	80.8816	●
PbANKA_06_v3	358996	360921	1926	359602	310	139.567	6.33773	136.99	●
PbANKA_06_v3	367329	368666	1338	367836	197	60.3837	4.17853	58.2405	●
PbANKA_06_v3	370827	372814	1988	372502	184	50.6458	3.79685	48.5853	●
PbANKA_06_v3	376559	379455	2897	377507	220	78.9633	4.8769	76.6978	●
PbANKA_06_v3	404749	406450	1702	405313	426	242.401	8.71601	239.34	●
PbANKA_06_v3	428704	429557	854	429138	199	67.9076	4.61964	65.7105	●
PbANKA_06_v3	466904	468002	1099	467362	162	35.2162	3.15104	33.3117	●
PbANKA_06_v3	507328	509314	1987	508437	467	296.534	10.3144	293.181	●
PbANKA_06_v3	517132	518860	1729	517404	212	58.0579	3.80326	55.9332	●
PbANKA_06_v3	523356	525349	1994	523719	244	83.7893	4.68741	81.4954	●
PbANKA_06_v3	534227	534877	651	534517	218	71.6325	4.47344	69.4111	●
PbANKA_06_v3	549987	550885	899	550666	225	55.0398	3.48329	52.9398
PbANKA_06_v3	604201	604870	670	604567	170	40.2568	3.36049	38.297	●
PbANKA_06_v3	630888	632233	1346	631469	199	53.0532	3.7109	50.9704	●
PbANKA_06_v3	725292	727058	1767	725902	534	283.243	7.94682	279.98	●
PbANKA_06_v3	792478	793653	1176	793355	205	55.5537	3.76537	53.4493	●
PbANKA_06_v3	816689	818222	1534	817947	167	39.5861	3.36029	37.6335
PbANKA_06_v3	836956	838233	1278	837441	471	242.51	7.60885	239.448	●
PbANKA_06_v3	861059	861537	479	861236	165	40.7479	3.46442	38.7832	●
PbANKA_06_v3	874466	875104	639	874805	234	86.0222	5.00956	83.7163	●
PbANKA_06_v3	917222	920655	3434	918539	514	311.69	9.63295	308.234	●
PbANKA_06_v3	943200	944152	953	943732	375	157.689	5.88766	155.025	●
PbANKA_07_v3	70187	73411	3225	72841	433	256.277	9.23833	253.152	●
PbANKA_07_v3	120247	121048	802	120528	228	83.129	4.96233	80.8388	●
PbANKA_07_v3	126597	127610	1014	127280	200	65.2741	4.42878	63.0947	●
PbANKA_07_v3	129776	130421	646	130102	217	67.8505	4.27152	65.6537	●
PbANKA_07_v3	142713	143991	1279	143325	404	198.769	7.13738	195.902	●
PbANKA_07_v3	145405	146340	936	145993	333	147.758	6.24435	145.139	●
PbANKA_07_v3	154526	155271	746	154878	156	34.3909	3.17688	32.4963	●
PbANKA_07_v3	183510	184117	608	183818	185	48.9642	3.67782	46.9196
PbANKA_07_v3	192424	193898	1475	192780	228	88.3246	5.28525	86.007	●
PbANKA_07_v3	232623	232996	374	232790	137	28.8661	3.05778	27.0442	●
PbANKA_07_v3	242814	243606	793	243130	201	61.6642	4.18546	59.5108	●
PbANKA_07_v3	295163	296525	1363	295851	476	310.75	10.7875	307.3	●
PbANKA_07_v3	369542	370789	1248	370254	176	39.496	3.2353	37.5443
PbANKA_07_v3	379366	380281	916	379890	201	60.1874	4.09621	58.0457	●
PbANKA_07_v3	385203	385905	703	385538	187	45.7148	3.45672	43.7014	●
PbANKA_07_v3	401987	402623	637	402291	340	154.399	6.42414	151.75	●
PbANKA_07_v3	419272	420310	1039	419873	196	42.1976	3.15503	40.2183
PbANKA_07_v3	433530	434305	776	434008	213	68.2659	4.36622	66.0663	●
PbANKA_07_v3	456998	459161	2164	457489	488	190.344	5.45143	187.515	●
PbANKA_07_v3	465814	467096	1283	466365	382	201.378	7.80498	198.499	●
PbANKA_07_v3	471663	473199	1537	472602	342	160.007	6.66346	157.333	●
PbANKA_07_v3	476414	477947	1534	477472	181	42.9519	3.37508	40.9652
PbANKA_07_v3	482124	483483	1360	482592	287	108.706	5.2069	106.286	●
PbANKA_07_v3	483568	485543	1976	484988	422	244.208	8.92922	241.14	●
PbANKA_07_v3	492068	492704	637	492446	189	43.4234	3.30106	41.4321	●
PbANKA_07_v3	512079	512981	903	512746	216	72.9424	4.58967	70.7129	●
PbANKA_07_v3	532574	533422	849	532972	326	144.611	6.2378	142.008	●
PbANKA_07_v3	642605	643552	948	643239	239	62.3524	3.67171	60.1939	●
PbANKA_07_v3	643666	645622	1957	644914	424	213.158	7.35055	210.233	●
PbANKA_07_v3	679767	680335	569	680040	178	39.3201	3.20045	37.3705
PbANKA_07_v3	688342	688854	513	688610	180	49.8916	3.81519	47.8383	●
PbANKA_07_v3	750831	752812	1982	752569	258	77.5256	4.14799	75.2693	●
PbANKA_07_v3	766343	767649	1307	767104	204	61.1928	4.1051	59.0433	●
PbANKA_07_v3	785301	786040	740	785654	219	67.1228	4.19668	64.9307	●
PbANKA_08_v3	27531	28231	701	27755	188	49.0368	3.63741	46.9916	●
PbANKA_08_v3	32753	33649	897	32969	200	52.652	3.67398	50.5726
PbANKA_08_v3	118801	120424	1624	119920	332	168.953	7.40926	166.235	●
PbANKA_08_v3	195978	196640	663	196372	203	50.1228	3.49488	48.0672	●
PbANKA_08_v3	223037	223819	783	223483	165	44.3652	3.70572	42.3651	●
PbANKA_08_v3	227102	227486	385	227286	159	34.7389	3.15955	32.8401
PbANKA_08_v3	228238	228786	549	228506	186	39.0859	3.09575	37.1386
PbANKA_08_v3	229177	229673	497	229420	231	58.8447	3.59833	56.7136	●
PbANKA_08_v3	236290	237748	1459	237344	181	53.9818	4.06289	51.8907	●
PbANKA_08_v3	269632	270457	826	270040	194	63.8821	4.45988	61.7124
PbANKA_08_v3	278589	279536	948	279063	301	110.179	5.03345	107.753	●
PbANKA_08_v3	368812	370047	1236	369235	233	72.146	4.2456	69.9213	●
PbANKA_08_v3	391319	394242	2924	393848	241	98.055	5.58682	95.6878	●
PbANKA_08_v3	410105	411054	950	410453	202	57.9138	3.94528	55.7903	●
PbANKA_08_v3	454344	455197	854	454925	140	29.8046	3.0832	27.9694
PbANKA_08_v3	469021	469632	612	469389	173	49.1691	3.88932	47.1227	●
PbANKA_08_v3	481339	481996	658	481695	144	42.0104	3.93957	40.0331	●
PbANKA_08_v3	487948	489136	1189	488247	194	50.6615	3.64565	48.6008
PbANKA_08_v3	547814	548716	903	548202	153	33.6463	3.16835	31.7608	●
PbANKA_08_v3	567348	568557	1210	567736	207	68.6655	4.50389	66.4634	●
PbANKA_08_v3	577804	578494	691	578097	235	83.7494	4.85539	81.4561	●
PbANKA_08_v3	597843	598886	1044	598449	267	89.4446	4.59132	87.121	●
PbANKA_08_v3	624790	625368	579	625078	192	59.7637	4.23203	57.6254	●
PbANKA_08_v3	646728	647560	833	647286	215	77.5717	4.8977	75.3149	●
PbANKA_08_v3	665878	666915	1038	666427	358	187.779	7.73483	184.96	●
PbANKA_08_v3	687727	688604	878	688167	239	76.0566	4.35729	73.809	●
PbANKA_08_v3	694012	696340	2329	695323	387	220.634	8.71188	217.677	●
PbANKA_08_v3	753454	756015	2562	754919	500	296.278	9.29581	292.927	●
PbANKA_08_v3	760463	761640	1178	760992	157	39.8024	3.52713	37.8474
PbANKA_08_v3	775735	776469	735	776128	174	48.3612	3.81799	46.3225
PbANKA_08_v3	847240	849141	1902	848319	334	161.56	6.94123	158.88	●
PbANKA_08_v3	862872	865955	3084	864957	389	200.558	7.57959	197.683	●
PbANKA_08_v3	872369	873201	833	872673	213	55.7551	3.6662	53.6489	●
PbANKA_08_v3	904722	905404	683	905086	177	50.3924	3.89917	48.3342	●
PbANKA_08_v3	949588	952018	2431	951012	268	102.906	5.26965	100.514	●
PbANKA_08_v3	982489	984416	1928	983698	526	360.291	11.7132	356.345	●
PbANKA_08_v3	996661	997374	714	997078	318	134.059	5.87454	131.513	●
PbANKA_08_v3	1002263	1004054	1792	1002843	446	264.549	9.27743	261.388	●
PbANKA_08_v3	1014781	1015436	656	1015221	166	40.7249	3.44787	38.7605
PbANKA_08_v3	1081169	1082477	1309	1081620	435	237.272	8.21379	234.234	●
PbANKA_08_v3	1083893	1085282	1390	1084450	144	31.2862	3.13189	29.4309
PbANKA_08_v3	1103639	1104294	656	1103948	153	32.4783	3.09073	30.6073
PbANKA_08_v3	1136563	1137313	751	1136936	321	133.547	5.78895	131.004	●
PbANKA_08_v3	1142944	1145274	2331	1144157	523	335.101	10.5003	331.455	●
PbANKA_08_v3	1153353	1154499	1147	1153971	286	115.495	5.5778	113.042	●
PbANKA_08_v3	1169136	1170515	1380	1169959	420	226.061	8.05468	223.08	●
PbANKA_08_v3	1180133	1180908	776	1180492	283	101.08	4.89958	98.6974	●
PbANKA_08_v3	1244749	1246350	1602	1245731	344	133.754	5.38495	131.21	●
PbANKA_08_v3	1276131	1276740	610	1276483	231	63.7629	3.84071	61.594	●
PbANKA_08_v3	1279463	1280073	611	1279741	260	95.409	5.02085	93.0556	●
PbANKA_08_v3	1308025	1309370	1346	1308500	187	45.588	3.44939	43.5759
PbANKA_08_v3	1335083	1336077	995	1335334	181	40.065	3.20742	38.1073	●
PbANKA_09_v3	79271	80844	1574	80053	252	93.5964	5.07763	91.2521	●
PbANKA_09_v3	81142	82977	1836	82488	501	319.629	10.4152	316.109	●
PbANKA_09_v3	99540	100792	1253	100054	393	214.291	8.18331	211.361	●
PbANKA_09_v3	136121	137124	1004	136613	269	117.625	6.09021	115.163	●
PbANKA_09_v3	150414	151321	908	150932	247	80.764	4.47437	78.4874	●
PbANKA_09_v3	171446	172133	688	171688	168	35.2826	3.08119	33.3773
PbANKA_09_v3	177340	178712	1373	178384	187	49.0636	3.65375	47.018	●
PbANKA_09_v3	213432	215539	2108	214816	422	208.751	7.19658	205.844	●
PbANKA_09_v3	216660	217604	945	217066	153	34.8584	3.24997	32.958	●
PbANKA_09_v3	222165	223950	1786	223452	222	65.8037	4.07611	63.6204	●
PbANKA_09_v3	245053	246466	1414	246190	156	35.6594	3.26086	33.7498
PbANKA_09_v3	270880	271414	535	271134	157	38.7671	3.45581	36.8233
PbANKA_09_v3	306570	307184	615	306934	144	32.9978	3.25371	31.1203
PbANKA_09_v3	332380	334534	2155	332934	134	27.925	3.0312	26.116
PbANKA_09_v3	412514	413311	798	412919	374	193.173	7.5881	190.331	●
PbANKA_09_v3	431868	432658	791	432096	227	67.7893	4.10642	65.5929	●
PbANKA_09_v3	579576	580285	710	579975	188	63.4162	4.5565	61.2498	●
PbANKA_09_v3	685821	687078	1258	686073	217	56.5986	3.65823	54.4858
PbANKA_09_v3	691557	692272	716	691988	162	38.982	3.39363	37.0358	●
PbANKA_09_v3	695447	696612	1166	696080	346	176.628	7.45094	173.867	●
PbANKA_09_v3	784288	785414	1127	785190	150	32.2391	3.11457	30.3713
PbANKA_09_v3	788760	791053	2294	790148	317	138.7	6.13179	136.128	●
PbANKA_09_v3	795784	796515	732	796162	253	76.6738	4.17678	74.4225	●
PbANKA_09_v3	814524	815026	503	814758	169	37.2251	3.1867	35.2978
PbANKA_09_v3	819756	820783	1028	820423	141	29.0315	3.01443	27.2073
PbANKA_09_v3	859923	860965	1043	860584	373	178.331	6.865	175.561	●
PbANKA_09_v3	874675	875740	1066	875222	292	95.8391	4.51595	93.4832	●
PbANKA_09_v3	898888	899789	902	899389	249	77.0481	4.2533	74.7943	●
PbANKA_09_v3	996970	999071	2102	998433	446	234.969	7.83598	231.942	●
PbANKA_09_v3	1083769	1084812	1044	1084143	304	128.456	5.88112	125.94	●
PbANKA_09_v3	1128811	1129923	1113	1129581	159	37.6188	3.34784	35.6872
PbANKA_09_v3	1133070	1134188	1119	1133582	334	159.594	6.83497	156.921	●
PbANKA_09_v3	1143499	1144184	686	1143904	242	63.6822	3.69891	61.514	●
PbANKA_09_v3	1174471	1175473	1003	1174889	244	83.7251	4.6839	81.4321	●
PbANKA_09_v3	1177649	1178303	655	1177961	227	77.4731	4.64631	75.2172	●
PbANKA_09_v3	1227089	1227989	901	1227495	333	145.879	6.15077	143.269	●
PbANKA_09_v3	1229772	1230271	500	1229956	172	44.3585	3.59059	42.3584	●
PbANKA_09_v3	1267169	1267826	658	1267550	225	76.876	4.64966	74.6234	●
PbANKA_09_v3	1279438	1280481	1044	1279985	269	106.006	5.41881	103.599	●
PbANKA_09_v3	1296979	1297609	631	1297329	156	33.0639	3.09027	31.1857
PbANKA_09_v3	1316979	1317730	752	1317319	164	39.5699	3.40252	37.6174
PbANKA_09_v3	1318857	1319700	844	1319176	163	39.8905	3.43844	37.9346
PbANKA_09_v3	1369133	1370388	1256	1369750	231	84.7807	4.99855	82.4814	●
PbANKA_09_v3	1377204	1379590	2387	1378596	532	344.74	10.6971	341.002	●
PbANKA_09_v3	1391938	1392788	851	1392508	169	39.5515	3.33026	37.5993
PbANKA_09_v3	1405773	1406504	732	1406183	181	42.127	3.32669	40.1485	●
PbANKA_09_v3	1459085	1459598	514	1459343	166	38.6879	3.31729	36.745
PbANKA_09_v3	1481029	1481920	892	1481505	172	39.8784	3.30988	37.9226	●
PbANKA_09_v3	1508955	1514781	5827	1511171	551	383.329	12.043	378.415
PbANKA_09_v3	1520341	1521363	1023	1520621	180	51.51	3.91925	49.4417	●
PbANKA_09_v3	1580722	1581730	1009	1581441	252	78.799	4.29589	76.5348	●
PbANKA_10_v3	67997	68418	422	68192	212	49.3067	3.34587	47.259
PbANKA_10_v3	97346	98287	942	97774	232	84.4847	4.95975	82.1872	●
PbANKA_10_v3	98395	100840	2446	98970	357	193.913	8.1124	191.068	●
PbANKA_10_v3	164561	165266	706	164918	332	182.01	8.19478	179.222	●
PbANKA_10_v3	215790	217346	1557	216705	405	251.83	9.93275	248.723	●
PbANKA_10_v3	343226	343864	639	343532	190	48.4217	3.57261	46.3823	●
PbANKA_10_v3	359869	361029	1161	360719	255	70.8	3.87281	68.5841
PbANKA_10_v3	405580	406097	518	405798	145	32.4756	3.20144	30.6047
PbANKA_10_v3	414337	415699	1363	415245	322	142.471	6.21631	139.879	●
PbANKA_10_v3	431764	433647	1884	433295	235	87.3468	5.0675	85.0342	●
PbANKA_10_v3	484059	484931	873	484610	148	36.4904	3.44163	34.5716
PbANKA_10_v3	490178	491705	1528	490653	230	71.9609	4.28376	69.7376	●
PbANKA_10_v3	503867	504326	460	504090	140	29.0267	3.02761	27.2026
PbANKA_10_v3	528762	529376	615	529060	179	39.0376	3.17217	37.0909
PbANKA_10_v3	604315	604905	591	604633	203	59.1403	4.00083	57.007	●
PbANKA_10_v3	675442	677424	1983	676767	457	234.826	7.5821	231.8	●
PbANKA_10_v3	711968	714295	2328	713788	228	63.7248	3.87924	61.5563	●
PbANKA_10_v3	716372	718455	2084	716895	364	156.676	6.0425	154.016	●
PbANKA_10_v3	781059	781789	731	781400	205	50.1477	3.47128	48.0918
PbANKA_10_v3	805498	806599	1102	805786	205	54.1186	3.68588	52.0263	●
PbANKA_10_v3	824466	825365	900	825083	166	41.1717	3.47691	39.2027	●
PbANKA_10_v3	865069	866201	1133	865900	172	44.6278	3.6079	42.6251	●
PbANKA_10_v3	880058	880712	655	880419	293	106.071	4.97255	103.664	●
PbANKA_10_v3	889771	891627	1857	890472	298	115.574	5.346	113.121	●
PbANKA_10_v3	953266	954322	1057	953713	200	59.7406	4.08646	57.6024	●
PbANKA_10_v3	955549	957043	1495	956250	254	84.1421	4.53449	81.8465	●
PbANKA_10_v3	974704	975352	649	974995	338	148.088	6.15467	145.467	●
PbANKA_10_v3	1098750	1099875	1126	1099473	214	72.6926	4.6139	70.4648	●
PbANKA_10_v3	1104257	1105122	866	1104616	276	115.492	5.79595	113.039	●
PbANKA_10_v3	1138350	1139217	868	1138677	169	34.4117	3.01758	32.5168
PbANKA_10_v3	1169201	1171565	2365	1170253	256	86.6185	4.62873	84.3097	●
PbANKA_10_v3	1275534	1276884	1351	1276030	192	59.5427	4.21788	57.4061	●
PbANKA_10_v3	1294594	1295906	1313	1294916	163	45.4843	3.81868	43.4733	●
PbANKA_10_v3	1322852	1324342	1491	1323623	335	166.997	7.21474	164.29	●
PbANKA_10_v3	1328254	1329490	1237	1329178	174	50.4263	3.95561	48.3679	●
PbANKA_10_v3	1384118	1386309	2192	1385957	227	53.0547	3.36634	50.9718
PbANKA_10_v3	1394139	1395825	1687	1395016	174	46.2254	3.67887	44.2071	●
PbANKA_10_v3	1438004	1439272	1269	1438424	207	60.972	4.04245	58.8242	●
PbANKA_10_v3	1457067	1459479	2413	1457936	438	269.947	9.8254	266.759	●
PbANKA_10_v3	1484841	1486987	2147	1486197	398	221.567	8.42877	218.606	●
PbANKA_10_v3	1537387	1538292	906	1537784	207	58.279	3.88869	56.1524	●
PbANKA_10_v3	1551981	1552897	917	1552500	388	236.399	9.61253	233.365	●
PbANKA_10_v3	1585060	1585623	564	1585332	162	32.8212	3.00172	30.946	●
PbANKA_11_v3	103045	103954	910	103682	253	92.5271	4.99841	90.1885	●
PbANKA_11_v3	135305	137666	2362	136460	542	349.921	10.6396	346.119	●
PbANKA_11_v3	156937	157996	1060	157395	158	34.1825	3.13678	32.2903
PbANKA_11_v3	226782	227411	630	227100	211	61.6235	4.01575	59.4705	●
PbANKA_11_v3	237482	239019	1538	237859	261	94.1101	4.93263	91.7638	●
PbANKA_11_v3	261280	262168	889	261713	148	31.5051	3.09174	29.6469
PbANKA_11_v3	277974	279380	1407	278554	389	193.611	7.23626	190.767	●
PbANKA_11_v3	327002	328333	1332	328054	163	40.6703	3.49001	38.7064	●
PbANKA_11_v3	338474	339520	1047	338867	231	67.7079	4.04243	65.512	●
PbANKA_11_v3	386958	389956	2999	388373	539	317.912	9.25117	314.404	●
PbANKA_11_v3	403780	404488	709	404174	207	50.5261	3.46675	48.4667	●
PbANKA_11_v3	413830	414965	1136	414321	511	234.27	6.57239	231.247	●
PbANKA_11_v3	418106	418847	742	418473	205	52.5249	3.59882	50.4468	●
PbANKA_11_v3	463462	464338	877	464010	187	46.6126	3.50891	44.5907
PbANKA_11_v3	465377	466378	1002	465970	330	147.812	6.31271	145.192	●
PbANKA_11_v3	512966	513931	966	513242	201	48.1368	3.41304	46.1003	●
PbANKA_11_v3	520485	522058	1574	521428	349	185.576	7.87215	182.767	●
PbANKA_11_v3	529327	530270	944	529828	204	64.8967	4.32846	62.7199
PbANKA_11_v3	576586	577335	750	577079	173	38.9515	3.24062	37.0057	●
PbANKA_11_v3	580606	582952	2347	582238	450	276.149	9.76943	272.927	●
PbANKA_11_v3	589431	591127	1697	590024	295	117.342	5.49213	114.88	●
PbANKA_11_v3	642376	646494	4119	644202	562	380.926	11.5329	376.281	●
PbANKA_11_v3	646911	648143	1233	647350	279	99.6948	4.89936	97.319	●
PbANKA_11_v3	664063	665164	1102	664696	300	117.051	5.38176	114.591	●
PbANKA_11_v3	752535	753369	835	753031	134	28.4342	3.0691	26.6181
PbANKA_11_v3	758617	759777	1161	759069	159	35.5986	3.21514	33.6899
PbANKA_11_v3	814004	815094	1091	814486	158	36.661	3.29883	34.74	●
PbANKA_11_v3	864187	865226	1040	864816	367	192.054	7.71738	189.217	●
PbANKA_11_v3	867439	868893	1455	868070	387	174.163	6.38028	171.416	●
PbANKA_11_v3	905470	907031	1562	905902	316	134.271	5.92652	131.725	●
PbANKA_11_v3	938536	939605	1070	939047	477	315.882	11.0409	312.392	●
PbANKA_11_v3	1006335	1007384	1050	1006668	178	57.9195	4.39251	55.7959	●
PbANKA_11_v3	1113109	1113693	585	1113378	175	42.7969	3.4478	40.8117	●
PbANKA_11_v3	1133634	1134699	1066	1134295	211	73.1698	4.70469	70.9392	●
PbANKA_11_v3	1161495	1162772	1278	1161866	190	45.5926	3.41044	43.5804
PbANKA_11_v3	1189302	1189848	547	1189619	195	39.7947	3.03997	37.8397	●
PbANKA_11_v3	1203939	1206078	2140	1205004	189	44.2685	3.3484	42.2692
PbANKA_11_v3	1222022	1223052	1031	1222554	253	87.2419	4.71284	84.93	●
PbANKA_11_v3	1229115	1229772	658	1229465	158	37.9309	3.38361	35.9958
PbANKA_11_v3	1237269	1237846	578	1237568	167	39.3355	3.3444	37.3856	●
PbANKA_11_v3	1255053	1255709	657	1255361	352	139.705	5.50982	137.127	●
PbANKA_11_v3	1343134	1344030	897	1343480	247	82.9445	4.58918	80.6556	●
PbANKA_11_v3	1468274	1469088	815	1468765	216	72.1268	4.54051	69.9022	●
PbANKA_11_v3	1499504	1500088	585	1499801	216	76.084	4.78253	73.8363	●
PbANKA_11_v3	1572568	1572960	393	1572738	138	30.3204	3.14979	28.4782
PbANKA_11_v3	1599407	1600429	1023	1599881	158	34.2294	3.1398	32.3367
PbANKA_11_v3	1638087	1638572	486	1638317	132	28.0818	3.07206	26.2706
PbANKA_11_v3	1675477	1676124	648	1675860	184	45.9597	3.51213	43.9441	●
PbANKA_11_v3	1709396	1710481	1086	1710224	234	66.0767	3.91676	63.8914	●
PbANKA_11_v3	1710818	1711307	490	1711060	151	31.0718	3.02349	29.2194
PbANKA_12_v3	56704	58192	1489	57153	218	72.1779	4.50564	69.953	●
PbANKA_12_v3	105753	106648	896	106199	179	48.3625	3.73453	46.3237	●
PbANKA_12_v3	113769	114343	575	114097	192	51.9582	3.75093	49.8854	●
PbANKA_12_v3	128950	129513	564	129210	179	46.8926	3.64229	44.8678	●
PbANKA_12_v3	187661	188791	1131	188320	304	145.883	6.84826	143.273	●
PbANKA_12_v3	193254	196195	2942	194363	329	143.291	6.10657	140.694	●
PbANKA_12_v3	210517	211961	1445	211191	253	88.6005	4.78509	86.2818	●
PbANKA_12_v3	232670	234465	1796	233372	407	219.264	8.05684	216.313	●
PbANKA_12_v3	238505	239741	1237	239223	210	69.4124	4.49145	67.2056	●
PbANKA_12_v3	241989	243522	1534	242596	376	197.378	7.75629	194.516	●
PbANKA_12_v3	285262	286221	960	285890	192	60.4374	4.27537	58.2938	●
PbANKA_12_v3	359048	360084	1037	359461	187	62.2722	4.4998	60.1142	●
PbANKA_12_v3	364865	366298	1434	365953	207	69.3354	4.5457	67.1291	●
PbANKA_12_v3	376773	379207	2435	378510	467	261.77	8.55434	258.621	●
PbANKA_12_v3	477860	479217	1358	478453	391	202.338	7.61846	199.455	●
PbANKA_12_v3	531282	532615	1334	531919	332	177.78	7.93309	175.013	●
PbANKA_12_v3	536909	537661	753	537227	185	51.9722	3.86319	49.8992	●
PbANKA_12_v3	539405	540978	1574	540422	295	122.36	5.75272	119.874	●
PbANKA_12_v3	542031	543345	1315	542678	313	149.256	6.80177	146.63	●
PbANKA_12_v3	559108	560769	1662	560339	209	64.2554	4.20036	62.0832	●
PbANKA_12_v3	585568	586506	939	586233	178	41.1078	3.30529	39.1395	●
PbANKA_12_v3	588455	589554	1100	588896	167	39.3423	3.34483	37.3924
PbANKA_12_v3	675044	675968	925	675669	228	69.5226	4.18391	67.3151	●
PbANKA_12_v3	681311	682365	1055	682019	207	64.3986	4.2438	62.2253	●
PbANKA_12_v3	701907	702541	635	702190	251	105.035	5.77451	102.632	●
PbANKA_12_v3	712771	714195	1425	713445	356	162.375	6.4679	159.691	●
PbANKA_12_v3	735856	736507	652	736250	157	36.759	3.31988	34.8371
PbANKA_12_v3	837305	839318	2014	838536	220	60.3196	3.81238	58.1769	●
PbANKA_12_v3	851830	854682	2853	853580	520	351.076	11.4301	347.263	●
PbANKA_12_v3	860125	860755	631	860370	162	35.8807	3.19313	33.9688
PbANKA_12_v3	931559	932628	1070	932089	345	150.501	6.12749	147.868	●
PbANKA_12_v3	938486	940667	2182	939559	558	357.563	10.5219	353.656	●
PbANKA_12_v3	942177	943852	1676	943082	371	171.931	6.60317	169.197	●
PbANKA_12_v3	1026042	1026730	689	1026352	329	110.236	4.62241	107.809	●
PbANKA_12_v3	1030823	1031382	560	1031087	148	30.1651	3.00107	28.3249
PbANKA_12_v3	1255222	1256447	1226	1255696	299	140.862	6.68845	138.277	●
PbANKA_12_v3	1282441	1283110	670	1282728	197	54.5599	3.82764	52.4638	●
PbANKA_12_v3	1293614	1294462	849	1294010	187	57.0896	4.15397	54.973	●
PbANKA_12_v3	1380522	1380985	464	1380758	172	44.6954	3.61225	42.6923	●
PbANKA_12_v3	1394035	1396192	2158	1395616	238	88.7549	5.08747	86.435	●
PbANKA_12_v3	1443127	1444192	1066	1443627	261	109.984	5.82951	107.559	●
PbANKA_12_v3	1500216	1501389	1174	1500667	200	66.6761	4.51851	64.487	●
PbANKA_12_v3	1509418	1510412	995	1509858	188	49.5854	3.67005	47.5348
PbANKA_12_v3	1556027	1556977	951	1556546	298	138.749	6.59144	136.177	●
PbANKA_12_v3	1562204	1563441	1238	1562752	338	151.04	6.30006	148.404	●
PbANKA_12_v3	1607699	1608179	481	1607939	194	56.8199	4.0116	54.7052
PbANKA_12_v3	1656373	1656994	622	1656625	226	62.34	3.83544	60.1815	●
PbANKA_12_v3	1671154	1672568	1415	1671716	209	65.6795	4.28461	63.4972	●
PbANKA_12_v3	1676336	1677013	678	1676706	221	79.1619	4.86794	76.8949	●
PbANKA_13_v3	58332	59385	1054	58921	215	73.4126	4.63805	71.1804	●
PbANKA_13_v3	90138	92329	2192	91372	500	332.74	11.1473	329.114	●
PbANKA_13_v3	165704	167735	2032	166611	541	374.811	11.9513	370.459	●
PbANKA_13_v3	263246	263733	488	263519	159	34.9161	3.17096	33.0151
PbANKA_13_v3	400932	401662	731	401311	234	77.7096	4.53136	75.4516	●
PbANKA_13_v3	437473	439657	2185	438750	421	236.224	8.53942	233.191	●
PbANKA_13_v3	456938	458076	1139	457197	199	48.3713	3.45041	46.3325
PbANKA_13_v3	459723	460666	944	460160	311	145.473	6.63954	142.865	●
PbANKA_13_v3	462989	464215	1227	463647	193	51.7802	3.72535	49.7093	●
PbANKA_13_v3	471235	472089	855	471708	204	48.0197	3.37103	45.9843	●
PbANKA_13_v3	490334	491808	1475	491530	187	51.1158	3.77779	49.0511	●
PbANKA_13_v3	501738	502800	1063	502229	263	111.541	5.87401	109.108	●
PbANKA_13_v3	518155	519037	883	518441	207	58.279	3.88869	56.1524	●
PbANKA_13_v3	548412	550621	2210	548886	185	60.2171	4.40201	58.0753	●
PbANKA_13_v3	560421	562137	1717	561226	427	248.324	8.99746	245.233	●
PbANKA_13_v3	568524	569737	1214	569483	203	66.0508	4.41899	63.8657	●
PbANKA_13_v3	651392	652121	730	651778	184	47.8293	3.62411	45.7957	●
PbANKA_13_v3	766982	767795	814	767437	305	145.67	6.80851	143.061	●
PbANKA_13_v3	770099	770769	671	770342	120	25.8614	3.08301	24.0829
PbANKA_13_v3	776133	776859	727	776385	245	98.5929	5.52351	96.2225	●
PbANKA_13_v3	856467	857690	1224	856930	179	43.8626	3.45651	41.8673	●
PbANKA_13_v3	980455	981002	548	980672	159	33.5763	3.08518	31.6915
PbANKA_13_v3	988001	988799	799	988390	174	49.8325	3.91572	47.7796	●
PbANKA_13_v3	1037189	1038176	988	1037553	162	36.5812	3.23783	34.6611	●
PbANKA_13_v3	1079899	1080825	927	1080289	174	44.0612	3.54111	42.064
PbANKA_13_v3	1217075	1217736	662	1217412	197	56.4967	3.94212	54.3848
PbANKA_13_v3	1244162	1244936	775	1244471	194	60.8201	4.26159	58.6736	●
PbANKA_13_v3	1249804	1252537	2734	1251804	224	71.1418	4.33853	68.9238	●
PbANKA_13_v3	1279024	1279836	813	1279354	185	43.8404	3.3747	41.8453	●
PbANKA_13_v3	1283837	1285556	1720	1284918	362	174.802	6.94501	172.052	●
PbANKA_13_v3	1291484	1292333	850	1291988	181	42.5528	3.35162	40.5701	●
PbANKA_13_v3	1430691	1431430	740	1431048	165	45.7369	3.79982	43.7234
PbANKA_13_v3	1435079	1435956	878	1435472	230	86.3922	5.11846	84.0849	●
PbANKA_13_v3	1474142	1475920	1779	1475050	247	93.0837	5.15092	90.7418	●
PbANKA_13_v3	1522424	1524487	2064	1523591	202	57.9138	3.94528	55.7903	●
PbANKA_13_v3	1651076	1651577	502	1651359	180	37.2326	3.05822	35.3052
PbANKA_13_v3	1669583	1670305	723	1669878	175	38.977	3.21702	37.0309
PbANKA_13_v3	1707995	1709134	1140	1708406	291	102.454	4.834	100.064	●
PbANKA_13_v3	1716811	1718479	1669	1718067	251	82.6286	4.50566	80.341	●
PbANKA_13_v3	1722231	1723044	814	1722694	199	49.2593	3.49894	47.2119	●
PbANKA_13_v3	1750521	1751291	771	1750891	204	58.5913	3.95289	56.4622	●
PbANKA_13_v3	1768021	1769104	1084	1768791	227	57.528	3.5815	55.4075	●
PbANKA_13_v3	1769450	1769978	529	1769712	160	33.3183	3.0565	31.4368
PbANKA_13_v3	1788833	1790862	2030	1789286	209	47.7162	3.29875	45.6837
PbANKA_13_v3	1794932	1795709	778	1795377	300	132.208	6.17173	129.673	●
PbANKA_13_v3	1813286	1813889	604	1813562	239	85.577	4.88165	83.2737	●
PbANKA_13_v3	1827435	1828733	1299	1827829	217	62.6964	3.98294	60.5353	●
PbANKA_13_v3	1879592	1880471	880	1879989	153	34.4493	3.2223	32.5539
PbANKA_13_v3	1888271	1889712	1442	1889200	421	241.59	8.8199	238.533	●
PbANKA_13_v3	1890855	1891766	912	1891259	179	46.8926	3.64229	44.8678	●
PbANKA_13_v3	1893284	1894810	1527	1893860	470	279.622	9.33452	276.381	●
PbANKA_13_v3	1920750	1922109	1360	1921454	431	249.879	8.95966	246.781	●
PbANKA_13_v3	1925872	1927448	1577	1926403	389	153.593	5.49416	150.946	●
PbANKA_13_v3	1956788	1960515	3728	1957758	271	114.581	5.86037	112.133	●
PbANKA_13_v3	2003575	2004924	1350	2004244	427	205.38	6.94511	202.486	●
PbANKA_13_v3	2006947	2008030	1084	2007632	238	81.73	4.683	79.4474	●
PbANKA_13_v3	2021437	2022292	856	2021710	152	34.3834	3.23208	32.4889
PbANKA_13_v3	2038457	2040402	1946	2039302	418	252.572	9.51809	249.461	●
PbANKA_13_v3	2048417	2051532	3116	2048751	210	66.323	4.30501	64.1362	●
PbANKA_13_v3	2056025	2056518	494	2056282	214	53.9538	3.55928	51.8629
PbANKA_13_v3	2067688	2068613	926	2068035	158	35.8309	3.24406	33.9195
PbANKA_13_v3	2190214	2191292	1079	2190850	277	117.751	5.90149	115.288	●
PbANKA_13_v3	2245315	2246280	966	2245929	296	118.091	5.51069	115.626	●
PbANKA_13_v3	2276555	2277434	880	2277062	223	81.1719	4.94941	78.8924	●
PbANKA_13_v3	2279541	2280447	907	2279974	235	92.6671	5.39359	90.3278	●
PbANKA_13_v3	2298227	2298812	586	2298574	147	32.4038	3.16744	30.5339	●
PbANKA_13_v3	2302286	2303132	847	2302816	239	69.6538	4.02741	67.4454	●
PbANKA_13_v3	2368595	2370996	2402	2369958	400	205.578	7.55442	202.683	●
PbANKA_13_v3	2401281	2403705	2425	2402739	351	177.543	7.36525	174.777	●
PbANKA_13_v3	2416963	2418016	1054	2417417	263	113.91	6.01761	111.465	●
PbANKA_13_v3	2424718	2426254	1537	2425230	186	60.2737	4.3849	58.1315	●
PbANKA_13_v3	2436599	2438386	1788	2437856	387	186.398	6.93728	183.585	●
PbANKA_13_v3	2455632	2456655	1024	2456127	242	79.2035	4.47496	76.9363	●
PbANKA_13_v3	2473053	2475345	2293	2473958	401	215.051	8.00266	212.117	●
PbANKA_14_v3	80857	81841	985	81328	256	105.269	5.66695	102.866	●
PbANKA_14_v3	82582	85559	2978	84514	536	325.634	9.6717	322.069	●
PbANKA_14_v3	200646	201497	852	201034	250	104.018	5.7364	101.62	●
PbANKA_14_v3	203418	204400	983	203946	187	54.0834	3.96178	51.9915	●
PbANKA_14_v3	301094	301811	718	301391	126	26.4865	3.03892	24.6981
PbANKA_14_v3	304657	305490	834	304939	142	33.2225	3.3013	31.3421
PbANKA_14_v3	332231	333241	1011	332649	219	84.857	5.27721	82.5574	●
PbANKA_14_v3	335443	335962	520	335700	156	35.6065	3.25734	33.6976
PbANKA_14_v3	391644	393144	1501	392534	295	139.72	6.7293	137.142	●
PbANKA_14_v3	470438	472202	1765	470737	198	57.0955	3.96152	54.9788	●
PbANKA_14_v3	508992	509869	878	509428	277	124.521	6.29957	122.025	●
PbANKA_14_v3	555080	555834	755	555589	180	45.5689	3.54575	43.5569
PbANKA_14_v3	564037	564754	718	564444	140	28.6573	3.00139	26.8382
PbANKA_14_v3	624219	625297	1079	624714	292	123.527	5.88042	121.036	●
PbANKA_14_v3	632896	633929	1034	633193	133	29.7415	3.18323	27.9073	●
PbANKA_14_v3	665337	665891	555	665617	148	31.4996	3.09136	29.6415	●
PbANKA_14_v3	847377	847780	404	847551	210	58.3296	3.84692	56.2025
PbANKA_14_v3	848950	849322	373	849147	154	32.5976	3.0856	30.7251
PbANKA_14_v3	881448	882022	575	881747	206	53.1975	3.62202	51.1135
PbANKA_14_v3	891357	892049	693	891736	276	120.751	6.10023	118.274	●
PbANKA_14_v3	903745	905154	1410	904349	351	184.678	7.76174	181.874	●
PbANKA_14_v3	992950	993576	627	993258	192	56.1443	4.00424	54.0351	●
PbANKA_14_v3	1019860	1020429	570	1020092	167	35.1067	3.08244	33.2035
PbANKA_14_v3	1130124	1131228	1105	1130980	248	83.1968	4.58545	80.906	●
PbANKA_14_v3	1136562	1138117	1556	1136909	166	48.9633	4.00714	46.9186	●
PbANKA_14_v3	1140574	1141489	916	1140973	191	51.8745	3.76123	49.8025	●
PbANKA_14_v3	1183160	1184006	847	1183482	206	53.1975	3.62202	51.1135	●
PbANKA_14_v3	1186694	1187830	1137	1187204	343	149.173	6.10457	146.547	●
PbANKA_14_v3	1210787	1213915	3129	1212538	559	390.93	12.1563	385.61	●
PbANKA_14_v3	1214072	1215522	1451	1215042	391	234.346	9.37996	231.323	●
PbANKA_14_v3	1219303	1220260	958	1219502	174	39.2702	3.24704	37.321	●
PbANKA_14_v3	1253145	1254384	1240	1253649	204	60.7845	4.08096	58.6382	●
PbANKA_14_v3	1302155	1302689	535	1302458	156	31.7192	3.00377	29.8583
PbANKA_14_v3	1359330	1361659	2330	1360742	545	341.093	10.1308	337.392	●
PbANKA_14_v3	1372975	1373451	477	1373197	167	35.7599	3.12215	33.8493	●
PbANKA_14_v3	1379688	1380331	644	1379947	166	48.4971	3.97408	46.4569
PbANKA_14_v3	1405779	1407328	1550	1406651	516	295.914	8.86554	292.565	●
PbANKA_14_v3	1407526	1409517	1992	1408721	274	109.745	5.51916	107.32	●
PbANKA_14_v3	1431312	1433797	2486	1432838	171	42.6514	3.49687	40.6677	●
PbANKA_14_v3	1440046	1441047	1002	1440449	205	64.8911	4.30961	62.7144	●
PbANKA_14_v3	1465996	1467621	1626	1467030	290	106.009	5.02035	103.602	●
PbANKA_14_v3	1569935	1570449	515	1570180	158	34.5392	3.15983	32.6427
PbANKA_14_v3	1588405	1589573	1169	1589125	315	138.97	6.19037	136.397	●
PbANKA_14_v3	1653087	1654402	1316	1653839	459	237.8	7.66685	234.76	●
PbANKA_14_v3	1678173	1679323	1151	1678807	286	117.55	5.68791	115.087	●
PbANKA_14_v3	1724578	1726081	1504	1725079	330	141.488	5.99685	138.9	●
PbANKA_14_v3	1784433	1786297	1865	1785655	323	130.19	5.58919	127.666	●
PbANKA_14_v3	1840933	1842777	1845	1841568	320	145.908	6.44237	143.298	●
PbANKA_14_v3	1888243	1889289	1047	1888786	308	142.008	6.52104	139.418	●
PbANKA_14_v3	1910031	1911014	984	1910343	236	71.1466	4.14696	68.9285	●
PbANKA_14_v3	1921505	1923295	1791	1922077	368	185.537	7.34573	182.728	●
PbANKA_14_v3	1940937	1941964	1028	1941532	320	158.483	7.14226	155.815	●
PbANKA_14_v3	1974529	1975715	1187	1975029	293	124.391	5.90508	121.896	●
PbANKA_14_v3	1976491	1977053	563	1976771	176	42.4573	3.41298	40.4754	●
PbANKA_14_v3	1985615	1986349	735	1986016	223	78.7696	4.80228	76.5056	●
PbANKA_14_v3	2020012	2020923	912	2020501	223	63.1542	3.91949	60.9898	●
PbANKA_14_v3	2027689	2029073	1385	2028070	218	65.5165	4.12308	63.3352	●
PbANKA_14_v3	2053002	2054436	1435	2053587	281	110.126	5.3953	107.7	●
PbANKA_14_v3	2060508	2063289	2782	2061441	500	316.42	10.2823	312.925	●
PbANKA_14_v3	2131188	2135218	4031	2133791	547	369.656	11.4664	365.513	●
PbANKA_14_v3	2179355	2180177	823	2179683	158	37.1962	3.33441	35.2692
PbANKA_14_v3	2180948	2182858	1911	2181529	343	158.187	6.54765	155.521	●
PbANKA_14_v3	2209908	2211409	1502	2210189	194	42.7578	3.20659	40.773
PbANKA_14_v3	2265423	2268242	2820	2266804	545	371.812	11.6478	367.601	●
PbANKA_14_v3	2276011	2277519	1509	2276892	459	258.338	8.6	255.203	●
PbANKA_14_v3	2300111	2301515	1405	2300823	238	81.3515	4.66189	79.0712	●
PbANKA_14_v3	2317659	2319336	1678	2318568	499	322.731	10.6429	319.187	●
PbANKA_14_v3	2339664	2340399	736	2339989	180	48.4437	3.72359	46.4042	●
PbANKA_14_v3	2383968	2386587	2620	2385052	556	385.175	11.9602	380.138	●
PbANKA_14_v3	2439364	2439809	446	2439593	184	44.6101	3.43258	42.6076
PbANKA_14_v3	2451735	2452611	877	2452161	174	41.1468	3.36049	39.1782

## Sheet: 2f
Supplementary file 2f. Peaks identified in ChIP-seq of sAP2-FG <Exp 2>
chr	start	end	length	abs_summit	pileup	-log10(p-value)	fold_enrichment	-log10(q-value)	common
PbANKA_01_v3	42296	42762	467	42480	142	29.824	3.05674	27.8074
PbANKA_01_v3	137737	139296	1560	138301	424	274.106	10.5762	270.812	●
PbANKA_01_v3	145272	146396	1125	146178	187	57.8039	4.20053	55.5338	●
PbANKA_01_v3	165160	165818	659	165490	199	65.0026	4.4313	62.6871	●
PbANKA_01_v3	195551	196315	765	196011	236	87.9338	5.08122	85.4881	●
PbANKA_01_v3	254646	256598	1953	255674	418	255.54	9.68844	252.331	●
PbANKA_01_v3	284774	285425	652	285069	211	63.8547	4.14315	61.5462	●
PbANKA_01_v3	293445	294377	933	294028	285	114.484	5.54479	111.906	●
PbANKA_01_v3	361464	364298	2835	362822	515	324.014	10.1975	320.331	●
PbANKA_01_v3	409143	410078	936	409595	189	51.8372	3.7901	49.6117	●
PbANKA_01_v3	440372	440855	484	440633	186	51.1299	3.79457	48.9103	●
PbANKA_01_v3	462774	464195	1422	463581	344	175.752	7.45751	172.889	●
PbANKA_02_v3	73057	74622	1566	73773	343	141.542	5.74822	138.843	●
PbANKA_02_v3	114224	115263	1040	114902	216	79.8904	5.02393	77.4889	●
PbANKA_02_v3	146919	149014	2096	147334	157	37.55	3.37305	35.4519	●
PbANKA_02_v3	202737	203634	898	203193	132	29.6413	3.19145	27.6272	●
PbANKA_02_v3	213617	214170	554	213840	150	39.2349	3.60693	37.121	●
PbANKA_02_v3	219308	219895	588	219547	158	42.6389	3.70887	40.4927	●
PbANKA_02_v3	221859	222623	765	222219	235	89.3023	5.1856	86.849	●
PbANKA_02_v3	252769	253231	463	253010	136	30.6127	3.20217	28.5864
PbANKA_02_v3	255622	256310	689	256049	173	55.0668	4.29796	52.8159	●
PbANKA_02_v3	290691	292340	1650	291337	511	352.442	11.8389	348.482	●
PbANKA_02_v3	309893	311262	1370	310686	268	110.175	5.6755	107.618	●
PbANKA_02_v3	324217	324748	532	324496	132	29.7504	3.19989	27.7349	●
PbANKA_02_v3	362599	363507	909	362937	180	56.3372	4.24051	54.0772	●
PbANKA_02_v3	411932	412287	356	412134	144	30.9573	3.10877	28.9268	●
PbANKA_02_v3	497255	497916	662	497694	137	33.6454	3.41716	31.5862	●
PbANKA_02_v3	506281	507075	795	506538	128	32.5569	3.49728	30.5089	●
PbANKA_02_v3	560409	561203	795	560759	230	81.0555	4.79739	78.6476	●
PbANKA_03_v3	43076	43910	835	43456	252	101.957	5.56259	99.4427	●
PbANKA_03_v3	93780	94966	1187	94134	137	29.0974	3.07469	27.09
PbANKA_03_v3	117222	118502	1281	117785	247	94.8941	5.25627	92.4143	●
PbANKA_03_v3	167312	167913	602	167628	205	77.8645	5.15199	75.4756	●
PbANKA_03_v3	173278	174545	1268	173825	330	159.447	6.92846	156.665	●
PbANKA_03_v3	188449	188944	496	188698	166	42.7248	3.57893	40.5779	●
PbANKA_03_v3	238875	239313	439	239087	159	41.0115	3.5776	38.8805	●
PbANKA_03_v3	243159	243783	625	243417	193	48.9428	3.56102	46.7414	●
PbANKA_03_v3	274180	274659	480	274406	201	43.9757	3.19421	41.8178
PbANKA_03_v3	341730	342670	941	342196	181	50.8175	3.85743	48.6003	●
PbANKA_03_v3	358998	359525	528	359294	180	42.1394	3.34032	39.9978	●
PbANKA_03_v3	422126	423065	940	422536	169	48.9161	3.94584	46.7148	●
PbANKA_03_v3	425194	426496	1303	425892	407	246.061	9.5171	242.897	●
PbANKA_03_v3	439301	439894	594	439580	160	47.422	4.01651	45.2339	●
PbANKA_03_v3	463551	464522	972	464258	196	56.6379	3.96698	54.3757	●
PbANKA_03_v3	495267	496135	869	495811	137	28.8636	3.0576	26.859	●
PbANKA_03_v3	498096	499123	1028	498863	184	54.346	4.03156	52.1004	●
PbANKA_03_v3	536108	537226	1119	536949	214	63.1148	4.05241	60.8112	●
PbANKA_03_v3	539654	540444	791	540096	207	66.6653	4.38064	64.3402	●
PbANKA_03_v3	541864	542826	963	542331	240	90.8151	5.16698	88.3543	●
PbANKA_03_v3	549635	550464	830	549899	257	115.523	6.2798	112.94	●
PbANKA_04_v3	50937	51903	967	51501	371	183.448	7.16442	180.546	●
PbANKA_04_v3	76012	76423	412	76241	141	28.8732	3.00328	26.8686	●
PbANKA_04_v3	98429	99471	1043	98957	337	183.101	8.09802	180.2	●
PbANKA_04_v3	102151	102602	452	102378	124	25.8908	3.02214	23.9247	●
PbANKA_04_v3	105811	106342	532	106058	183	48.9087	3.7052	46.7075	●
PbANKA_04_v3	116442	117450	1009	116775	184	66.5482	4.87415	64.2237	●
PbANKA_04_v3	121412	122472	1061	122215	147	38.711	3.62264	36.6022	●
PbANKA_04_v3	139273	140295	1023	139550	186	64.9372	4.70859	62.6221	●
PbANKA_04_v3	147187	148429	1243	147460	158	42.5012	3.6991	40.3564	●
PbANKA_04_v3	163742	164262	521	164035	128	27.305	3.07262	25.3206	●
PbANKA_04_v3	185117	185905	789	185377	172	52.0833	4.10772	49.8558	●
PbANKA_04_v3	245193	246370	1178	245845	194	55.5279	3.93298	53.2736	●
PbANKA_04_v3	276740	277929	1190	277247	370	184.662	7.25051	181.754	●
PbANKA_04_v3	310766	312037	1272	311411	520	342.832	10.9923	338.971	●
PbANKA_04_v3	366110	367484	1375	366479	224	86.8524	5.28621	84.4128	●
PbANKA_04_v3	381556	382412	857	382174	162	40.2385	3.47683	38.1149	●
PbANKA_04_v3	393442	393858	417	393670	147	31.2962	3.09097	29.262	●
PbANKA_04_v3	418199	418717	519	418425	189	43.3986	3.29968	41.2457	●
PbANKA_04_v3	474992	476008	1017	475376	200	59.5147	4.07288	57.2337	●
PbANKA_04_v3	480301	480990	690	480557	187	53.5192	3.92636	51.2802	●
PbANKA_04_v3	484282	484822	541	484604	152	35.2642	3.2923	33.188	●
PbANKA_04_v3	561237	561705	469	561498	160	33.3155	3.05632	31.2595
PbANKA_04_v3	571041	571755	715	571493	142	32.2355	3.22924	30.1908
PbANKA_04_v3	572188	573520	1333	573100	349	187.359	7.97575	184.437	●
PbANKA_04_v3	620317	620906	590	620652	239	99.9364	5.75762	97.4322	●
PbANKA_04_v3	653106	653835	730	653474	338	167.323	7.15239	164.502	●
PbANKA_04_v3	699320	699925	606	699600	195	56.5296	3.97705	54.2682	●
PbANKA_05_v3	98657	99112	456	98871	154	32.4284	3.07452	30.3819	●
PbANKA_05_v3	139693	140903	1211	140019	264	121.159	6.44547	118.551	●
PbANKA_05_v3	143324	144089	766	143733	191	60.6185	4.3066	58.3308	●
PbANKA_05_v3	172555	173465	911	173098	249	102.104	5.64298	99.5892	●
PbANKA_05_v3	212680	213699	1020	213247	163	38.5631	3.35166	36.4558	●
PbANKA_05_v3	259243	260303	1061	259538	192	47.0216	3.46528	44.8369	●
PbANKA_05_v3	301624	302150	527	301827	144	31.4458	3.14315	29.41	●
PbANKA_05_v3	344981	346063	1083	345485	201	60.2305	4.09879	57.9452	●
PbANKA_05_v3	346917	347774	858	347355	340	160.604	6.74174	157.817	●
PbANKA_05_v3	363308	363696	389	363530	157	36.2528	3.2861	34.1668	●
PbANKA_05_v3	393896	394606	711	394350	171	53.7796	4.24855	51.5384	●
PbANKA_05_v3	457435	458055	621	457825	147	36.4067	3.45228	34.319	●
PbANKA_05_v3	464731	466245	1515	465476	333	184.958	8.34696	182.048	●
PbANKA_05_v3	491946	493429	1484	493028	138	29.3633	3.07975	27.3525
PbANKA_05_v3	500568	501583	1016	500938	342	188.539	8.26825	185.612	●
PbANKA_05_v3	516486	517403	918	516782	148	35.3175	3.35744	33.2407	●
PbANKA_05_v3	524630	525946	1317	525188	291	149.571	7.46839	146.837	●
PbANKA_05_v3	547636	549412	1777	548347	446	273.641	9.7636	270.35	●
PbANKA_05_v3	559662	561523	1862	560403	510	367.572	12.7672	363.442	●
PbANKA_05_v3	561811	563634	1824	562607	421	272.666	10.6044	269.381
PbANKA_05_v3	590727	591450	724	591093	317	129.535	5.67123	126.889	●
PbANKA_05_v3	597279	598006	728	597744	260	104.748	5.54355	102.219	●
PbANKA_05_v3	605555	606092	538	605763	140	28.9619	3.02301	26.9561	●
PbANKA_05_v3	649597	650910	1314	650410	525	379.297	12.8342	374.666	●
PbANKA_05_v3	692141	693007	867	692431	206	80.2751	5.29437	77.8716	●
PbANKA_05_v3	707419	708000	582	707746	147	43.8808	4.02329	41.7239	●
PbANKA_05_v3	802398	802966	569	802695	183	62.1936	4.58344	59.8962	●
PbANKA_05_v3	846080	847263	1184	846509	273	122.811	6.30129	120.195	●
PbANKA_05_v3	851320	852048	729	851796	153	37.6291	3.44086	35.5303	●
PbANKA_05_v3	869490	870021	532	869687	163	49.0077	4.07105	46.8056	●
PbANKA_05_v3	878841	880279	1439	879990	198	76.9138	5.26658	74.5311	●
PbANKA_05_v3	892152	892546	395	892336	116	26.3988	3.19795	24.4259
PbANKA_05_v3	895334	896587	1254	895943	351	171.351	7.03477	168.508	●
PbANKA_06_v3	94382	94807	426	94600	181	61.9094	4.60937	59.6137	●
PbANKA_06_v3	130674	131893	1220	131498	173	54.595	4.26426	52.3475	●
PbANKA_06_v3	150889	152865	1977	151947	337	184.231	8.16741	181.324	●
PbANKA_06_v3	226208	227167	960	226805	180	60.5939	4.53809	58.3063	●
PbANKA_06_v3	359150	360026	877	359605	276	121.726	6.15794	119.114	●
PbANKA_06_v3	360202	360869	668	360505	142	31.0262	3.14212	28.9951
PbANKA_06_v3	367411	368276	866	367812	144	35.1747	3.41233	33.0997	●
PbANKA_06_v3	372056	372783	728	372483	139	36.8156	3.62834	34.7242	●
PbANKA_06_v3	376561	378754	2194	377513	193	72.3095	5.06458	69.9535	●
PbANKA_06_v3	404962	405740	779	405331	364	206.212	8.61385	203.214	●
PbANKA_06_v3	428768	429463	696	429068	155	46.1893	4.02883	44.0116	●
PbANKA_06_v3	467138	467981	844	467318	131	30.5773	3.28115	28.5514	●
PbANKA_06_v3	507402	508979	1578	508447	414	250.121	9.51297	246.935	●
PbANKA_06_v3	517129	518586	1458	517417	161	41.7267	3.59341	39.589	●
PbANKA_06_v3	523419	524105	687	523669	175	53.5918	4.15255	51.3523	●
PbANKA_06_v3	534286	534783	498	534549	164	49.6178	4.09486	47.4107	●
PbANKA_06_v3	604247	604886	640	604548	139	31.2742	3.2049	29.2402	●
PbANKA_06_v3	610086	610663	578	610420	144	31.8831	3.17409	29.8424
PbANKA_06_v3	631122	632209	1088	631370	163	36.2767	3.20508	34.1903	●
PbANKA_06_v3	725357	726538	1182	725970	498	300.27	9.54103	296.811	●
PbANKA_06_v3	793076	793606	531	793363	145	34.6528	3.35762	32.583	●
PbANKA_06_v3	837032	837738	707	837448	408	245.622	9.45721	242.46	●
PbANKA_06_v3	861086	861554	469	861303	132	29.9699	3.21691	27.9515	●
PbANKA_06_v3	874443	875143	701	874798	222	85.6908	5.25899	83.2569	●
PbANKA_06_v3	917912	919222	1311	918545	466	289.784	9.9825	286.399	●
PbANKA_06_v3	943290	944059	770	943709	330	159.164	6.91291	156.383	●
PbANKA_07_v3	70247	73479	3233	72836	382	213.889	8.48594	210.863	●
PbANKA_07_v3	120320	120982	663	120563	175	55.618	4.29434	53.3631	●
PbANKA_07_v3	126850	127560	711	127303	138	35.8926	3.57464	33.8098	●
PbANKA_07_v3	129826	130386	561	130131	180	59.3386	4.44889	57.0587	●
PbANKA_07_v3	142731	143834	1104	143308	364	209.971	8.84119	206.959	●
PbANKA_07_v3	145648	146285	638	145959	238	106.049	6.1941	103.514	●
PbANKA_07_v3	154614	155263	650	154874	117	26.4703	3.18611	24.4965	●
PbANKA_07_v3	192507	193512	1006	192781	202	74.9734	5.02669	72.6019	●
PbANKA_07_v3	232606	232995	390	232810	124	27.5718	3.15778	25.584	●
PbANKA_07_v3	242890	243386	497	243144	142	32.139	3.22224	30.0955	●
PbANKA_07_v3	295228	296442	1215	295872	410	240.618	9.10632	237.477	●
PbANKA_07_v3	379391	380302	912	379880	163	44.5621	3.75431	42.3991	●
PbANKA_07_v3	385259	385823	565	385464	156	38.811	3.4748	36.7012	●
PbANKA_07_v3	402010	402623	614	402291	296	141.343	6.79897	138.645	●
PbANKA_07_v3	433689	434298	610	434018	172	56.3762	4.41497	54.1159	●
PbANKA_07_v3	457065	459037	1973	457479	435	182.245	5.88624	179.348	●
PbANKA_07_v3	465934	466958	1025	466413	343	186.227	8.09545	183.31	●
PbANKA_07_v3	471633	472994	1362	472593	284	129.472	6.41274	126.827	●
PbANKA_07_v3	482199	483305	1107	482652	247	105.219	5.88853	102.688	●
PbANKA_07_v3	484449	485498	1050	484984	367	205.64	8.48254	202.644	●
PbANKA_07_v3	492208	492645	438	492464	154	33.501	3.14512	31.4433	●
PbANKA_07_v3	512348	512962	615	512667	193	63.2837	4.44108	60.979	●
PbANKA_07_v3	532681	533398	718	532967	245	91.6346	5.10891	89.1697	●
PbANKA_07_v3	642662	643498	837	643249	163	37.8839	3.30773	35.783	●
PbANKA_07_v3	644172	645325	1154	644893	357	186.318	7.68208	183.401	●
PbANKA_07_v3	688372	688778	407	688594	157	40.2789	3.56024	38.1548	●
PbANKA_07_v3	751459	752763	1305	752505	179	46.1679	3.59732	43.9905	●
PbANKA_07_v3	766658	767335	678	767098	172	44.8346	3.62122	42.6691	●
PbANKA_07_v3	785356	785989	634	785609	168	45.3955	3.72391	43.2249	●
PbANKA_08_v3	27581	28116	536	27817	159	43.222	3.73219	41.0707	●
PbANKA_08_v3	118826	120259	1434	119914	264	121.967	6.49761	119.355	●
PbANKA_08_v3	196047	196651	605	196397	178	53.2365	4.06976	50.9998	●
PbANKA_08_v3	223223	223771	549	223505	157	47.3435	4.07374	45.1562	●
PbANKA_08_v3	229256	229643	388	229413	151	31.6346	3.06081	29.5967	●
PbANKA_08_v3	236625	237694	1070	237390	160	47.1513	3.99658	44.9657	●
PbANKA_08_v3	278664	279481	818	279056	285	127.803	6.28815	125.165	●
PbANKA_08_v3	368880	369712	833	369240	180	46.736	3.61731	44.5536	●
PbANKA_08_v3	391630	393103	1474	392294	209	80.2098	5.21293	77.8068
PbANKA_08_v3	393542	394255	714	393899	235	104.2	6.15486	101.673	●
PbANKA_08_v3	410217	410893	677	410529	137	28.7256	3.04754	26.7229	●
PbANKA_08_v3	469195	469690	496	469410	135	33.9352	3.47605	31.873	●
PbANKA_08_v3	481507	481991	485	481711	116	27.9428	3.33462	25.9501	●
PbANKA_08_v3	547988	548383	396	548168	109	23.4874	3.06439	21.555	●
PbANKA_08_v3	567287	568414	1128	567733	133	29.3521	3.15346	27.3415	●
PbANKA_08_v3	577854	578467	614	578120	214	76.3932	4.84463	74.0133	●
PbANKA_08_v3	597270	598849	1580	598484	206	74.7463	4.91643	72.3761	●
PbANKA_08_v3	624865	625308	444	625068	125	27.7241	3.15358	25.7343	●
PbANKA_08_v3	646978	647559	582	647238	218	86.9664	5.44373	84.5263	●
PbANKA_08_v3	665898	666832	935	666473	329	155.661	6.7477	152.895	●
PbANKA_08_v3	679134	679641	508	679419	124	26.5912	3.07829	24.6157
PbANKA_08_v3	687766	688473	708	688156	186	58.81	4.28657	56.5334	●
PbANKA_08_v3	694090	696231	2142	695331	324	167.877	7.58102	165.053	●
PbANKA_08_v3	753564	755661	2098	754918	472	316.977	11.2932	313.362	●
PbANKA_08_v3	847505	848801	1297	848348	283	134.959	6.77581	132.289	●
PbANKA_08_v3	864319	865858	1540	864942	366	210.297	8.79282	207.285	●
PbANKA_08_v3	872486	872982	497	872691	153	31.9306	3.05468	29.8893	●
PbANKA_08_v3	904823	905275	453	905083	123	25.9353	3.04113	23.9686	●
PbANKA_08_v3	949715	951346	1632	951018	192	66.6043	4.68628	64.2795	●
PbANKA_08_v3	982730	984227	1498	983707	488	345.258	12.3439	341.374	●
PbANKA_08_v3	996763	997309	547	997074	266	119.978	6.3145	117.375	●
PbANKA_08_v3	1002396	1004010	1615	1002816	364	203.823	8.47195	200.835	●
PbANKA_08_v3	1081226	1082325	1100	1081678	393	215.488	8.24717	212.456	●
PbANKA_08_v3	1136622	1137204	583	1136914	274	114.651	5.79416	112.072	●
PbANKA_08_v3	1143329	1145041	1713	1144142	499	318.904	10.4425	315.272	●
PbANKA_08_v3	1153539	1154478	940	1154020	225	83.95	5.07833	81.5261	●
PbANKA_08_v3	1169314	1170675	1362	1169946	395	231.311	9.06529	228.213	●
PbANKA_08_v3	1180236	1180949	714	1180544	242	82.3783	4.64623	79.963	●
PbANKA_08_v3	1244953	1246369	1417	1245818	283	123.515	6.08889	120.896	●
PbANKA_08_v3	1276229	1276763	535	1276467	171	47.5833	3.81861	45.3939	●
PbANKA_08_v3	1279517	1279996	480	1279774	184	45.1171	3.46234	42.9489	●
PbANKA_08_v3	1335087	1335845	759	1335326	156	41.4807	3.66222	39.3451	●
PbANKA_09_v3	79317	80608	1292	80125	182	65.1312	4.82004	62.8149	●
PbANKA_09_v3	82039	82920	882	82472	442	279.762	10.2434	276.437	●
PbANKA_09_v3	99667	100581	915	100082	316	164.237	7.60486	161.432	●
PbANKA_09_v3	136301	137016	716	136590	216	79.793	5.01764	77.3918	●
PbANKA_09_v3	150529	151222	694	150965	196	63.0385	4.36483	60.7355	●
PbANKA_09_v3	166717	167306	590	166962	141	31.2479	3.17274	29.2143
PbANKA_09_v3	177788	178727	940	178406	140	32.9199	3.31114	30.8679	●
PbANKA_09_v3	213899	214387	489	214139	134	29.1951	3.12621	27.1865
PbANKA_09_v3	214481	215309	829	214817	352	196.888	8.44824	193.928	●
PbANKA_09_v3	216853	217394	542	217097	129	28.0937	3.11871	26.0991	●
PbANKA_09_v3	222488	223740	1253	223421	164	42.4975	3.59616	40.3527	●
PbANKA_09_v3	412643	413240	598	412919	290	149.781	7.51532	147.045	●
PbANKA_09_v3	431926	432383	458	432151	161	37.9649	3.3415	35.8631	●
PbANKA_09_v3	579657	580239	583	579964	177	54.1641	4.15207	51.9197	●
PbANKA_09_v3	678446	678993	548	678651	165	41.3263	3.50235	39.1922
PbANKA_09_v3	691645	692237	593	691981	126	28.1994	3.17543	26.2035	●
PbANKA_09_v3	695577	696459	883	696028	319	173.058	8.06356	170.207	●
PbANKA_09_v3	789756	790817	1062	790125	240	102.881	5.92366	100.362	●
PbANKA_09_v3	795885	796489	605	796164	224	67.777	4.15233	65.4459	●
PbANKA_09_v3	860181	861046	866	860557	357	188.571	7.80769	185.644	●
PbANKA_09_v3	874782	875557	776	875231	196	55.6471	3.90761	53.392	●
PbANKA_09_v3	899054	899668	615	899351	163	37.4144	3.27756	35.3176	●
PbANKA_09_v3	997096	998952	1857	998474	404	225.717	8.47609	222.643	●
PbANKA_09_v3	1083802	1084676	875	1084165	229	88.4908	5.27225	86.0423	●
PbANKA_09_v3	1133179	1133978	800	1133596	269	120.132	6.24315	117.528	●
PbANKA_09_v3	1143472	1144058	587	1143883	143	30.4539	3.08733	28.4295	●
PbANKA_09_v3	1174526	1175401	876	1174924	179	57.4641	4.33903	55.1962	●
PbANKA_09_v3	1177723	1178301	579	1177956	179	50.313	3.85916	48.1003	●
PbANKA_09_v3	1226865	1227853	989	1227496	288	120.778	5.81957	118.171	●
PbANKA_09_v3	1229778	1230202	425	1229953	136	31.9651	3.30487	29.9235	●
PbANKA_09_v3	1267230	1267803	574	1267476	193	66.3732	4.64798	64.0497	●
PbANKA_09_v3	1279706	1280286	581	1279966	225	92.8031	5.65501	90.3335	●
PbANKA_09_v3	1298598	1299012	415	1298793	128	29.0022	3.20658	26.996
PbANKA_09_v3	1369256	1370255	1000	1369734	189	65.7124	4.69317	63.3927	●
PbANKA_09_v3	1377573	1379385	1813	1378582	483	336.922	12.0444	333.118	●
PbANKA_09_v3	1405866	1406404	539	1406175	150	32.9197	3.16072	30.8677	●
PbANKA_09_v3	1481197	1481761	565	1481499	159	43.3288	3.73976	41.1767	●
PbANKA_09_v3	1509904	1514892	4989	1512996	520	385.668	13.4399	380.236
PbANKA_09_v3	1520428	1521290	863	1520664	158	45.0093	3.87955	42.842	●
PbANKA_09_v3	1580734	1581695	962	1581383	185	53.2266	3.9422	50.99	●
PbANKA_10_v3	97462	98289	828	97753	191	74.0711	5.24792	71.7048	●
PbANKA_10_v3	98606	100669	2064	98980	328	182.361	8.35348	179.464	●
PbANKA_10_v3	143578	144511	934	143810	105	22.6153	3.05593	20.6966
PbANKA_10_v3	164630	165278	649	164901	278	139.888	7.24955	137.196	●
PbANKA_10_v3	216009	217203	1195	216662	330	187.933	8.64563	185.009	●
PbANKA_10_v3	343231	343861	631	343495	177	51.5712	3.9771	49.3479	●
PbANKA_10_v3	414964	415741	778	415241	244	103.167	5.83559	100.646	●
PbANKA_10_v3	431836	433638	1803	433272	190	69.8451	4.96295	67.5027	●
PbANKA_10_v3	490206	491440	1235	490654	177	45.4735	3.58437	43.3021	●
PbANKA_10_v3	604397	604902	506	604686	152	39.6474	3.60139	37.5294	●
PbANKA_10_v3	675519	677234	1716	676808	402	228.21	8.67002	225.126	●
PbANKA_10_v3	713449	714178	730	713802	202	56.5309	3.86522	54.2695	●
PbANKA_10_v3	716506	718429	1924	716854	291	110.892	5.24281	108.332	●
PbANKA_10_v3	805514	805965	452	805694	138	29.2238	3.06962	27.2147	●
PbANKA_10_v3	824634	825367	734	825079	140	33.2131	3.33305	31.1581	●
PbANKA_10_v3	843329	843751	423	843543	113	23.562	3.00265	21.6288
PbANKA_10_v3	865526	866175	650	865938	138	30.9545	3.19664	28.9241	●
PbANKA_10_v3	880086	880644	559	880409	231	83.4223	4.91716	81.001	●
PbANKA_10_v3	889843	890826	984	890464	245	85.6736	4.77243	83.2397	●
PbANKA_10_v3	953388	954171	784	953677	158	43.8729	3.79712	41.716	●
PbANKA_10_v3	955700	956609	910	956240	178	53.2365	4.06976	50.9998	●
PbANKA_10_v3	974734	975306	573	975015	308	144.508	6.66206	141.796	●
PbANKA_10_v3	1098775	1099681	907	1099423	176	57.244	4.38831	54.9778	●
PbANKA_10_v3	1104336	1104908	573	1104616	246	106.099	5.97175	103.563	●
PbANKA_10_v3	1169345	1170595	1251	1170229	194	67.0538	4.67194	64.7266	●
PbANKA_10_v3	1275758	1276808	1051	1276055	153	48.1962	4.23007	46.0013	●
PbANKA_10_v3	1294650	1295754	1105	1294881	172	59.3904	4.63986	57.1101	●
PbANKA_10_v3	1323011	1323987	977	1323592	287	146.593	7.40265	143.872	●
PbANKA_10_v3	1328972	1329360	389	1329192	141	34.7685	3.43315	32.6975	●
PbANKA_10_v3	1384288	1385211	924	1384589	135	29.6081	3.14209	27.5943
PbANKA_10_v3	1394696	1395590	895	1395006	141	35.0744	3.45632	33.0002	●
PbANKA_10_v3	1438123	1439158	1036	1438457	158	44.5234	3.84417	42.3607	●
PbANKA_10_v3	1457188	1459215	2028	1457925	400	245.59	9.73677	242.428	●
PbANKA_10_v3	1484893	1486626	1734	1486232	326	171.917	7.76431	169.072	●
PbANKA_10_v3	1537368	1538137	770	1537724	182	55.715	4.15892	53.4594	●
PbANKA_10_v3	1552102	1552850	749	1552508	345	217.997	10.1179	214.956	●
PbANKA_10_v3	1585059	1585589	531	1585310	142	37.3505	3.6125	35.2544	●
PbANKA_11_v3	88179	88639	461	88391	188	65.0295	4.66847	62.7137
PbANKA_11_v3	103318	103949	632	103588	213	71.3459	4.5513	68.9951	●
PbANKA_11_v3	135409	137472	2064	136450	499	341.028	11.6487	337.184	●
PbANKA_11_v3	226742	227367	626	227132	163	40.6386	3.48791	38.511	●
PbANKA_11_v3	237537	239068	1532	237859	224	85.1484	5.17679	82.7176	●
PbANKA_11_v3	278042	279284	1243	278581	361	192.083	7.88879	189.142	●
PbANKA_11_v3	327699	328299	601	328056	139	32.0804	3.26467	30.0376	●
PbANKA_11_v3	338227	339408	1182	338865	159	34.6034	3.15083	32.5344	●
PbANKA_11_v3	340240	340742	503	340539	137	29.9522	3.13758	27.9341
PbANKA_11_v3	387307	389404	2098	388348	505	316.78	10.1442	313.167	●
PbANKA_11_v3	403950	404377	428	404160	167	35.0355	3.07812	32.9618	●
PbANKA_11_v3	413865	414804	940	414301	467	245.435	7.82025	242.274	●
PbANKA_11_v3	418252	418676	425	418477	164	36.4363	3.20202	34.3483	●
PbANKA_11_v3	465581	466295	715	465992	285	122.605	5.98934	119.99	●
PbANKA_11_v3	513037	513581	545	513211	167	34.6999	3.05783	32.6297	●
PbANKA_11_v3	521003	521926	924	521444	312	165.407	7.80655	162.596	●
PbANKA_11_v3	576803	577330	528	577109	156	39.4847	3.52154	37.3681	●
PbANKA_11_v3	580736	582867	2132	582262	400	243.443	9.60742	240.291	●
PbANKA_11_v3	589741	590951	1211	590041	214	85.9381	5.47842	83.5029	●
PbANKA_11_v3	642440	645629	3190	644170	527	382.547	12.943	377.655	●
PbANKA_11_v3	646940	647857	918	647427	249	85.9004	4.7121	83.4654	●
PbANKA_11_v3	664288	664972	685	664686	244	95.5722	5.36313	93.089	●
PbANKA_11_v3	814031	814998	968	814510	152	38.7638	3.53778	36.6543	●
PbANKA_11_v3	864230	865144	915	864802	351	203.12	8.86992	200.134	●
PbANKA_11_v3	867006	868772	1767	868048	353	183.74	7.65156	180.836	●
PbANKA_11_v3	905544	907024	1481	905896	245	97.3967	5.4505	94.9055	●
PbANKA_11_v3	938585	939570	986	939036	416	274.026	10.8919	270.733	●
PbANKA_11_v3	1006382	1007304	923	1006683	158	52.5423	4.45549	50.3111	●
PbANKA_11_v3	1113114	1113718	605	1113402	135	32.7716	3.38439	30.7212	●
PbANKA_11_v3	1133969	1134635	667	1134228	160	45.2363	3.85734	43.0671	●
PbANKA_11_v3	1162307	1162802	496	1162554	130	32.1057	3.42168	30.0627
PbANKA_11_v3	1189381	1189828	448	1189599	149	38.8122	3.5938	36.7024	●
PbANKA_11_v3	1222100	1222870	771	1222575	177	55.2444	4.22644	52.9922	●
PbANKA_11_v3	1237327	1237810	484	1237612	142	37.9294	3.65746	35.828	●
PbANKA_11_v3	1255089	1255689	601	1255352	296	135.8	6.4723	133.127	●
PbANKA_11_v3	1343250	1343873	624	1343467	190	53.5059	3.87559	51.2671	●
PbANKA_11_v3	1468398	1469122	725	1468737	154	45.0645	3.96438	42.8968	●
PbANKA_11_v3	1499609	1500092	484	1499818	164	54.3084	4.44675	52.0631	●
PbANKA_11_v3	1675635	1676064	430	1675858	143	35.4531	3.45004	33.3749	●
PbANKA_11_v3	1709461	1710421	961	1710225	155	33.7229	3.14638	31.6627	●
PbANKA_12_v3	56884	58084	1201	57141	224	91.3786	5.58528	88.9158	●
PbANKA_12_v3	105853	106543	691	106202	140	33.129	3.32676	31.075	●
PbANKA_12_v3	113816	114305	490	114091	164	53.8757	4.41346	51.6337	●
PbANKA_12_v3	128946	129497	552	129216	178	47.3815	3.68857	45.1937	●
PbANKA_12_v3	187911	188640	730	188355	217	75.9066	4.75071	73.5298	●
PbANKA_12_v3	193435	194868	1434	194343	257	116.235	6.32597	113.648	●
PbANKA_12_v3	195202	196002	801	195480	133	32.8203	3.42405	30.7695
PbANKA_12_v3	210541	211452	912	211227	191	54.1061	3.89588	51.8623	●
PbANKA_12_v3	232799	234079	1281	233360	320	166.532	7.62184	163.716	●
PbANKA_12_v3	238641	239504	864	239186	163	43.7099	3.69544	41.5544	●
PbANKA_12_v3	242171	243562	1392	242594	320	179.671	8.46176	176.787	●
PbANKA_12_v3	285520	286140	621	285923	155	45.6776	3.98996	43.5043	●
PbANKA_12_v3	359130	360013	884	359542	151	45.2599	4.0437	43.0906	●
PbANKA_12_v3	365220	366214	995	365958	146	40.228	3.7572	38.1044	●
PbANKA_12_v3	377950	379041	1092	378525	435	280.468	10.5412	277.14	●
PbANKA_12_v3	404280	404815	536	404537	141	30.5451	3.12209	28.5196
PbANKA_12_v3	477974	479132	1159	478408	323	163.777	7.36648	160.975	●
PbANKA_12_v3	531428	532413	986	531906	321	185.093	8.79159	182.182	●
PbANKA_12_v3	536939	537572	634	537220	142	34.9036	3.42609	32.8312	●
PbANKA_12_v3	540105	541043	939	540452	221	86.9227	5.36439	84.4828	●
PbANKA_12_v3	542236	543682	1447	542636	236	99.757	5.82534	97.2538	●
PbANKA_12_v3	559927	560614	688	560355	186	56.4263	4.12963	54.1657	●
PbANKA_12_v3	585997	586449	453	586195	154	33.4066	3.13887	31.3499	●
PbANKA_12_v3	675192	675952	761	675637	203	65.897	4.40937	63.5762	●
PbANKA_12_v3	681458	682265	808	681987	136	32.8628	3.37402	30.8116	●
PbANKA_12_v3	701890	702521	632	702157	221	83.3783	5.13325	80.9572	●
PbANKA_12_v3	712947	713937	991	713409	298	131.505	6.18008	128.851	●
PbANKA_12_v3	838254	839202	949	838519	172	44.8346	3.62122	42.6691	●
PbANKA_12_v3	851678	854451	2774	853602	473	323.842	11.6622	320.161	●
PbANKA_12_v3	931693	932515	823	932117	293	116.875	5.50776	114.285	●
PbANKA_12_v3	938834	940451	1618	939559	512	301.388	9.21083	297.923	●
PbANKA_12_v3	942426	943674	1249	942997	350	170.494	7.01478	167.657	●
PbANKA_12_v3	1026044	1026719	676	1026317	251	87.2695	4.7498	84.8272	●
PbANKA_12_v3	1245732	1246182	451	1245935	123	25.8339	3.03296	23.8685
PbANKA_12_v3	1255291	1256483	1193	1255698	232	92.752	5.4716	90.2825	●
PbANKA_12_v3	1282433	1283044	612	1282694	168	48.8373	3.95938	46.6367	●
PbANKA_12_v3	1293716	1294325	610	1293943	139	35.995	3.56372	33.9113	●
PbANKA_12_v3	1380528	1380968	441	1380749	129	26.6361	3.00596	24.66	●
PbANKA_12_v3	1394241	1396101	1861	1395672	188	58.44	4.22287	56.1657	●
PbANKA_12_v3	1443263	1444049	787	1443597	207	71.5663	4.6869	69.2142	●
PbANKA_12_v3	1488314	1489029	716	1488776	147	30.6936	3.04976	28.6663
PbANKA_12_v3	1500335	1500912	578	1500662	140	37.959	3.6993	35.8573	●
PbANKA_12_v3	1512323	1512934	612	1512584	141	29.8059	3.06927	27.7896
PbANKA_12_v3	1556047	1556903	857	1556534	244	109.555	6.2572	107.001	●
PbANKA_12_v3	1562440	1563069	630	1562745	236	95.9511	5.57739	93.4662	●
PbANKA_12_v3	1656430	1656998	569	1656698	166	34.5519	3.06064	32.4832	●
PbANKA_12_v3	1671283	1672451	1169	1671773	147	39.0316	3.64673	36.9195	●
PbANKA_12_v3	1676408	1676947	540	1676631	153	37.2173	3.4121	35.1223	●
PbANKA_13_v3	58462	59208	747	58956	195	80.4552	5.61821	78.0504	●
PbANKA_13_v3	90213	91894	1682	91380	451	321.475	12.4669	317.816	●
PbANKA_13_v3	166030	167636	1607	166665	514	379.084	13.3003	374.477	●
PbANKA_13_v3	400941	401539	599	401286	178	48.767	3.77663	46.5671	●
PbANKA_13_v3	437658	439578	1921	438719	381	209.24	8.25676	206.231	●
PbANKA_13_v3	459828	460495	668	460178	267	126.338	6.69422	123.707	●
PbANKA_13_v3	463059	464075	1017	463615	139	35.4214	3.51895	33.3434	●
PbANKA_13_v3	471409	471943	535	471683	148	37.3824	3.50646	35.2858	●
PbANKA_13_v3	483412	484760	1349	484526	122	26.456	3.09943	24.4824
PbANKA_13_v3	490358	491659	1302	491425	130	29.2894	3.19636	27.2795	●
PbANKA_13_v3	501922	502496	575	502205	220	93.6293	5.85191	91.156	●
PbANKA_13_v3	518094	518874	781	518460	175	50.8525	3.96583	48.6351	●
PbANKA_13_v3	548555	549505	951	548966	132	32.7258	3.43484	30.676	●
PbANKA_13_v3	560542	561758	1217	561230	400	244.039	9.64315	240.884	●
PbANKA_13_v3	568903	569780	878	569466	179	62.4217	4.69438	60.1228	●
PbANKA_13_v3	651488	652054	567	651829	146	42.3283	3.92151	40.185	●
PbANKA_13_v3	766973	767745	773	767434	264	128.198	6.91117	125.558	●
PbANKA_13_v3	776150	776621	472	776372	162	48.4613	4.05173	46.2639	●
PbANKA_13_v3	856496	857605	1110	856960	150	38.9402	3.58535	36.829	●
PbANKA_13_v3	988143	988697	555	988395	118	24.5886	3.00925	22.6406	●
PbANKA_13_v3	1037344	1038054	711	1037625	130	30.3003	3.27626	28.2777	●
PbANKA_13_v3	1244147	1244719	573	1244430	147	42.2258	3.89214	40.0835	●
PbANKA_13_v3	1250098	1251329	1232	1250872	133	27.9218	3.04533	25.9292
PbANKA_13_v3	1251590	1252139	550	1251832	132	30.4344	3.25309	28.4103	●
PbANKA_13_v3	1278921	1279714	794	1279354	156	44.0669	3.84952	41.9083	●
PbANKA_13_v3	1283988	1285453	1466	1285031	321	164.304	7.45659	161.499	●
PbANKA_13_v3	1291669	1292263	595	1292000	160	37.3817	3.31765	35.2852	●
PbANKA_13_v3	1406548	1406987	440	1406749	126	27.5093	3.12006	25.5222
PbANKA_13_v3	1435156	1435716	561	1435463	183	57.9901	4.29202	55.7188	●
PbANKA_13_v3	1474505	1475411	907	1475005	186	54.0506	3.97707	51.8071	●
PbANKA_13_v3	1523111	1524017	907	1523603	160	46.7186	3.96484	44.5365	●
PbANKA_13_v3	1708023	1709003	981	1708457	244	90.2319	5.04859	87.7738	●
PbANKA_13_v3	1717767	1718292	526	1718027	220	67.3915	4.19533	65.0623	●
PbANKA_13_v3	1722293	1722950	658	1722601	193	52.3881	3.76115	50.1581	●
PbANKA_13_v3	1750519	1751301	783	1750919	159	49.0206	4.15745	46.8185	●
PbANKA_13_v3	1768566	1769008	443	1768782	163	36.2767	3.20508	34.1903	●
PbANKA_13_v3	1788874	1789972	1099	1789468	182	58.4661	4.34516	56.1917
PbANKA_13_v3	1795056	1795683	628	1795374	223	80.727	4.92192	78.3209	●
PbANKA_13_v3	1813323	1813768	446	1813537	174	51.9073	4.05625	49.6811	●
PbANKA_13_v3	1827566	1828111	546	1827813	179	51.1672	3.91456	48.9471	●
PbANKA_13_v3	1888272	1889676	1405	1889190	388	232.807	9.39296	229.702	●
PbANKA_13_v3	1890913	1891540	628	1891196	139	28.8131	3.02604	26.8092	●
PbANKA_13_v3	1893518	1894139	622	1893870	447	292.948	10.8314	289.541	●
PbANKA_13_v3	1920845	1921935	1091	1921436	408	248.994	9.65451	245.813	●
PbANKA_13_v3	1926010	1926976	967	1926361	316	132.754	5.85017	130.095	●
PbANKA_13_v3	1957244	1959684	2441	1957725	220	77.3388	4.77682	74.9534	●
PbANKA_13_v3	2003649	2004914	1266	2004263	357	190.005	7.88852	187.072	●
PbANKA_13_v3	2007438	2007937	500	2007642	179	56.4409	4.26806	54.1802	●
PbANKA_13_v3	2038640	2040363	1724	2039305	387	240.578	9.91189	237.438	●
PbANKA_13_v3	2048455	2049703	1249	2048710	173	53.2444	4.1688	51.0076	●
PbANKA_13_v3	2190372	2191241	870	2190866	226	90.454	5.47199	87.9954	●
PbANKA_13_v3	2245632	2246291	660	2245953	251	111.619	6.19404	109.055	●
PbANKA_13_v3	2276567	2277331	765	2277055	188	71.0802	5.10594	68.7311	●
PbANKA_13_v3	2279743	2280339	597	2279991	178	65.0269	4.91542	62.7111	●
PbANKA_13_v3	2298339	2298788	450	2298508	115	24.2224	3.02673	22.2794	●
PbANKA_13_v3	2302384	2303148	765	2302807	221	82.9437	5.10542	80.525	●
PbANKA_13_v3	2369308	2370644	1337	2369935	305	154.348	7.33134	151.589	●
PbANKA_13_v3	2402203	2403238	1036	2402717	280	133.027	6.74121	130.366	●
PbANKA_13_v3	2417117	2417941	825	2417374	193	72.897	5.10723	70.5374	●
PbANKA_13_v3	2424996	2425608	613	2425238	127	27.7489	3.12316	25.7587	●
PbANKA_13_v3	2436855	2438445	1591	2437852	333	186.744	8.46098	183.824	●
PbANKA_13_v3	2455836	2456412	577	2456099	188	58.44	4.22287	56.1657	●
PbANKA_13_v3	2472981	2474939	1959	2473958	371	207.334	8.45419	204.332	●
PbANKA_14_v3	80820	81741	922	81344	235	106.865	6.34203	104.325	●
PbANKA_14_v3	83295	85408	2114	84540	492	323.693	10.9355	320.015	●
PbANKA_14_v3	200775	201378	604	201038	227	97.7514	5.93979	95.2581	●
PbANKA_14_v3	203523	204420	898	203941	159	48.6865	4.13213	46.4871	●
PbANKA_14_v3	332454	332992	539	332666	165	57.5321	4.67391	55.2638	●
PbANKA_14_v3	391835	392862	1028	392485	229	95.3146	5.71716	92.8324	●
PbANKA_14_v3	470560	470983	424	470743	128	29.8591	3.27537	27.8421	●
PbANKA_14_v3	508908	509769	862	509419	258	123.524	6.78272	120.905	●
PbANKA_14_v3	624371	625188	818	624709	215	77.0909	4.86716	74.7068	●
PbANKA_14_v3	632955	633443	489	633193	120	24.9005	3.00364	22.9482	●
PbANKA_14_v3	665337	665763	427	665554	110	25.0737	3.19088	23.1189	●
PbANKA_14_v3	698586	699000	415	698801	137	29.5691	3.10931	27.5559
PbANKA_14_v3	891391	892029	639	891739	222	95.5469	5.92998	93.0638	●
PbANKA_14_v3	903974	905122	1149	904351	240	107.38	6.22657	104.838	●
PbANKA_14_v3	992966	993499	534	993226	178	60.8528	4.60332	58.5636	●
PbANKA_14_v3	1130639	1131200	562	1130937	198	61.0002	4.1986	58.7101	●
PbANKA_14_v3	1136559	1137968	1410	1136964	142	42.5883	4.03199	40.4427	●
PbANKA_14_v3	1140595	1141315	721	1140918	135	33.98	3.4796	31.9172	●
PbANKA_14_v3	1183225	1183972	748	1183495	164	47.0668	3.91146	44.8819	●
PbANKA_14_v3	1186803	1187624	822	1187223	288	121.592	5.86412	118.981	●
PbANKA_14_v3	1211665	1213545	1881	1212519	519	392.333	13.9091	385.063	●
PbANKA_14_v3	1214154	1215522	1369	1215105	334	185.185	8.32717	182.274	●
PbANKA_14_v3	1219300	1219722	423	1219513	126	27.2421	3.09876	25.2585	●
PbANKA_14_v3	1253164	1254275	1112	1253632	162	49.357	4.11775	47.1521	●
PbANKA_14_v3	1360018	1361547	1530	1360755	492	303.034	9.85267	299.556	●
PbANKA_14_v3	1373012	1373413	402	1373210	146	33.3189	3.24629	31.2628	●
PbANKA_14_v3	1406003	1407356	1354	1406661	469	287.393	9.76093	284.023	●
PbANKA_14_v3	1407658	1409153	1496	1408769	248	111.778	6.2903	109.213	●
PbANKA_14_v3	1431492	1433205	1714	1432842	131	32.6449	3.4469	30.5961	●
PbANKA_14_v3	1440145	1440901	757	1440456	162	47.9907	4.01732	45.7974	●
PbANKA_14_v3	1466556	1467423	868	1467073	228	82.0156	4.89506	79.6021	●
PbANKA_14_v3	1588436	1589478	1043	1589147	256	114.95	6.27071	112.369	●
PbANKA_14_v3	1652955	1654382	1428	1653820	435	252.435	8.97467	249.239	●
PbANKA_14_v3	1678278	1679196	919	1678832	237	88.6514	5.10266	86.2018	●
PbANKA_14_v3	1724621	1725886	1266	1725098	274	115.602	5.84863	113.018	●
PbANKA_14_v3	1784676	1786222	1547	1785549	329	149.114	6.40204	146.382	●
PbANKA_14_v3	1786792	1787313	522	1787002	150	32.8154	3.15362	30.7646
PbANKA_14_v3	1841063	1842037	975	1841541	292	138.799	6.75688	136.113	●
PbANKA_14_v3	1888344	1889133	790	1888800	216	75.8999	4.77108	73.523	●
PbANKA_14_v3	1909998	1910740	743	1910386	200	64.5076	4.38024	62.195	●
PbANKA_14_v3	1921669	1922997	1329	1922111	309	153.622	7.16806	150.867	●
PbANKA_14_v3	1940925	1941927	1003	1941535	282	141.421	7.22217	138.723	●
PbANKA_14_v3	1974637	1975507	871	1975006	205	72.512	4.79144	70.1548	●
PbANKA_14_v3	1976497	1976988	492	1976753	148	37.5061	3.51551	35.4085	●
PbANKA_14_v3	1985663	1986312	650	1986021	172	50.6176	4.00618	48.4021	●
PbANKA_14_v3	2020043	2020758	716	2020493	191	59.809	4.25405	57.5261	●
PbANKA_14_v3	2027831	2028335	505	2028054	165	45.3419	3.77257	43.172	●
PbANKA_14_v3	2053095	2054177	1083	2053653	230	100.213	6.02446	97.7079	●
PbANKA_14_v3	2060533	2063267	2735	2061436	472	291.882	9.90079	288.482	●
PbANKA_14_v3	2131920	2134988	3069	2133811	514	359.448	12.1223	355.419	●
PbANKA_14_v3	2181189	2182040	852	2181540	285	124.561	6.10044	121.938	●
PbANKA_14_v3	2265856	2267742	1887	2266809	506	334.829	11.0487	331.052	●
PbANKA_14_v3	2276181	2277226	1046	2276889	414	255.963	9.85378	252.753	●
PbANKA_14_v3	2300099	2301199	1101	2300864	184	56.9814	4.20437	54.717	●
PbANKA_14_v3	2317872	2319236	1365	2318561	442	287.731	10.7105	284.358	●
PbANKA_14_v3	2339758	2340344	587	2340021	139	33.8139	3.39525	31.7529	●
PbANKA_14_v3	2384088	2385924	1837	2385052	514	370.965	12.8015	366.738	●

## Sheet: 2g
Supplementary file 2g. Peaks identified in DIP-seq using recombinant AP2 domain of AP2-FG and P. berghei genomic DNA.
chr	start	end	length	abs_summit	pileup	-log10(p-value)	fold_enrichment	-log10(q-value)
PbANKA_00_v3_archived_contig_1	56297	56797	501	56565	137	162.943	30.5342	159.613
PbANKA_07_v3	806	1123	318	1041	51	66.5688	24.9649	64.1534
PbANKA_11_v3	24	571	548	293	33	44.5193	20.2764	42.4027
PbANKA_08_v3	14	572	559	270	69	72.4609	19.5971	69.9743
PbANKA_13_v3	1526940	1527737	798	1527264	636	508.659	15.562	503.695
PbANKA_01_v3	363	953	591	743	83	68.0891	13.3773	65.656
PbANKA_07_v3	739350	740041	692	739645	455	334.452	13.16	330.066
PbANKA_11_v3	1762186	1762565	380	1762376	56	46.8961	12.5852	44.7427
PbANKA_10_v3	116436	117042	607	116730	572	395.092	11.9108	390.483
PbANKA_04_v3	14	314	301	158	61	47.8753	11.6285	45.7071
PbANKA_12_v3	304929	305622	694	305197	433	278.427	10.4944	274.318
PbANKA_14_v3	185282	185985	704	185608	445	284.58	10.4137	280.42
PbANKA_01_v3	306947	309592	2646	307269	471	290.629	9.86691	286.435
PbANKA_12_v3	777477	778448	972	777810	394	242.685	9.77928	238.801
PbANKA_08_v3	534765	535429	665	535135	456	279.848	9.77462	275.727
PbANKA_11_v3	702815	703851	1037	703297	493	302.051	9.77367	297.806
PbANKA_06_v3	258780	259351	572	259044	380	233.968	9.75976	230.154
PbANKA_13_v3	304685	306520	1836	306199	373	228.206	9.65878	224.438
PbANKA_09_v3	376788	377795	1008	377494	383	232.764	9.5711	228.962
PbANKA_02_v3	132	1356	1225	762	68	46.0447	9.53328	43.9046
PbANKA_14_v3	2473955	2475060	1106	2474281	201	123.618	9.42152	120.599			2
PbANKA_05_v3	88069	88783	715	88409	434	259.084	9.35826	255.097
PbANKA_07_v3	34040	34735	696	34432	181	109.474	9.12224	106.586
PbANKA_01_v3	69228	69807	580	69526	437	255.074	9.05292	251.112
PbANKA_10_v3	1356429	1356985	557	1356699	408	238.21	9.03574	234.36
PbANKA_14_v3	1988414	1989242	829	1988685	409	238.209	9.00398	234.359
PbANKA_14_v3	794971	795721	751	795330	377	219.884	8.99659	216.175
PbANKA_10_v3	143	553	411	360	98	61.2012	8.98604	58.853
PbANKA_13_v3	1839446	1840498	1053	1840116	418	242.205	8.94321	238.325
PbANKA_01_v3	45600	46472	873	46213	424	243.077	8.80961	239.19
PbANKA_09_v3	561668	562581	914	561926	347	197.322	8.64464	193.747
PbANKA_13_v3	2082307	2083445	1139	2083187	424	239.822	8.63991	235.962
PbANKA_13_v3	2065441	2065981	541	2065699	395	223.119	8.60295	219.386
PbANKA_10_v3	1030904	1032013	1110	1031589	366	205.198	8.48865	201.575
PbANKA_14_v3	1403147	1403788	642	1403442	446	246.931	8.39416	243.018
PbANKA_07_v3	533557	534378	822	533951	525	288.641	8.34952	284.458
PbANKA_11_v3	45039	45536	498	45252	137	79.0244	8.32977	76.4593
PbANKA_12_v3	979603	981043	1441	980734	433	237.926	8.29769	234.078
PbANKA_10_v3	1273901	1274468	568	1274164	383	208.702	8.16879	205.061
PbANKA_10_v3	741251	741767	517	741482	345	188.242	8.15292	184.727
PbANKA_14_v3	2035321	2036283	963	2036067	283	155.114	8.13716	151.842
PbANKA_09_v3	787326	787887	562	787583	341	184.189	8.03621	180.702
PbANKA_07_v3	322424	322954	531	322715	292	158.429	8.0349	155.133
PbANKA_13_v3	1168146	1168707	562	1168417	349	188.117	8.02011	184.603
PbANKA_08_v3	745500	747711	2212	746945	380	203.238	7.95875	199.626
PbANKA_14_v3	2484276	2484786	511	2484528	278	149.432	7.91543	146.207
PbANKA_03_v3	596647	597799	1153	597564	59	35.4438	7.85928	33.4842
PbANKA_08_v3	1008990	1009617	628	1009243	309	164.474	7.84606	161.134
PbANKA_10_v3	171495	172055	561	171776	359	190.107	7.83605	186.58
PbANKA_04_v3	279597	280269	673	279952	378	198.906	7.78294	195.321
PbANKA_10_v3	1047804	1048975	1172	1048626	313	164.999	7.74794	161.655
PbANKA_04_v3	319563	320241	679	319952	431	224.342	7.70136	220.598
PbANKA_13_v3	199131	200320	1190	199617	340	177.828	7.69078	174.387
PbANKA_13_v3	1399002	1399612	611	1399384	339	176.687	7.654	173.253
PbANKA_13_v3	1708036	1708622	587	1708342	293	153.208	7.6431	149.951
PbANKA_13_v3	35909	36691	783	36103	91	50.6906	7.6033	48.4817
PbANKA_10_v3	884899	885350	452	885123	300	155.861	7.58511	152.583
PbANKA_13_v3	1305983	1306500	518	1306278	262	136.679	7.58152	133.548
PbANKA_06_v3	959856	960962	1107	960745	323	167.11	7.56513	163.752
PbANKA_03_v3	171665	172979	1315	172563	364	187.547	7.55636	184.037
PbANKA_12_v3	1595807	1596532	726	1596245	365	187.823	7.5443	184.311
PbANKA_13_v3	1733973	1734924	952	1734319	381	195.659	7.53477	192.094
PbANKA_14_v3	914525	915755	1231	914792	337	172.962	7.49701	169.555
PbANKA_12_v3	1384487	1385038	552	1384751	293	150.341	7.45361	147.108
PbANKA_09_v3	1460212	1460679	468	1460404	263	135.145	7.43278	132.025
PbANKA_13_v3	283344	283945	602	283644	393	199.296	7.41774	195.708
PbANKA_12_v3	1129977	1132960	2984	1132693	323	164.217	7.39246	160.879
PbANKA_13_v3	1311933	1312504	572	1312195	295	149.776	7.35291	146.548
PbANKA_12_v3	946880	947666	787	947390	346	173.805	7.29514	170.392
PbANKA_14_v3	215053	216281	1229	215343	307	154.083	7.25483	150.82
PbANKA_11_v3	216461	217543	1083	217003	354	176.418	7.22602	172.986
PbANKA_12_v3	974865	975839	975	975123	305	152.451	7.21439	149.202
PbANKA_14_v3	1757124	1757708	585	1757449	323	160.944	7.20097	157.629
PbANKA_03_v3	514831	515392	562	515111	389	192.774	7.19572	189.23
PbANKA_12_v3	1678773	1679248	476	1678995	303	151.07	7.18903	147.832
PbANKA_05_v3	113838	115407	1570	114119	296	147.678	7.18849	144.465
PbANKA_07_v3	630788	631253	466	630995	246	123.379	7.17877	120.362
PbANKA_07_v3	841524	842099	576	841795	41	24.3239	7.15115	22.5942
PbANKA_11_v3	354151	355156	1006	354422	372	183.368	7.13622	179.887
PbANKA_08_v3	118506	119439	934	118838	244	121.75	7.12878	118.748
PbANKA_04_v3	678	1644	967	1437	85	45.248	7.10743	43.1202
PbANKA_06_v3	915379	916413	1035	916108	358	175.628	7.08376	172.201
PbANKA_01_v3	384485	385808	1324	384954	357	175.134	7.08294	171.711
PbANKA_13_v3	946188	946648	461	946389	265	130.662	7.04752	127.578
PbANKA_09_v3	1194808	1195581	774	1195044	303	148.702	7.04466	145.482
PbANKA_12_v3	172179	172625	447	172415	243	120.006	7.0338	117.021
PbANKA_07_v3	257883	259057	1175	258706	274	134.535	7.0201	131.419
PbANKA_12_v3	282766	284295	1530	283030	329	160.631	7.02005	157.319
PbANKA_10_v3	522420	523177	758	522654	282	137.956	6.99587	134.816
PbANKA_01_v3	262633	263467	835	262905	374	181.344	6.98879	177.878
PbANKA_03_v3	211389	211913	525	211651	297	144.797	6.98011	141.606
PbANKA_12_v3	721616	722094	479	721857	240	117.515	6.95362	114.555
PbANKA_10_v3	576837	577921	1085	577627	335	162.106	6.94529	158.783
PbANKA_06_v3	182294	182773	480	182559	237	115.906	6.93877	112.96
PbANKA_14_v3	2217218	2218295	1078	2217937	290	140.622	6.92595	137.462
PbANKA_11_v3	930260	931432	1173	930838	294	142.238	6.90984	139.065
PbANKA_14_v3	2088283	2088802	520	2088541	247	120.121	6.90338	117.135
PbANKA_14_v3	1876084	1876551	468	1876333	259	125.685	6.89944	122.648
PbANKA_03_v3	452415	452993	579	452677	270	130.755	6.89417	127.67
PbANKA_09_v3	557598	558472	875	557906	239	116.014	6.87647	113.067
PbANKA_11_v3	1165329	1165905	577	1165630	285	136.381	6.80695	133.253
PbANKA_10_v3	1582305	1583450	1146	1583216	269	128.865	6.79988	125.798
PbANKA_12_v3	845280	846129	850	845586	271	129.667	6.79183	126.593
PbANKA_10_v3	1300476	1300988	513	1300727	299	142.582	6.79013	139.407
PbANKA_12_v3	1513879	1514842	964	1514107	327	155.334	6.77993	152.06
PbANKA_10_v3	115101	115644	544	115385	271	129.479	6.77953	126.406
PbANKA_09_v3	82216	82731	516	82446	252	120.541	6.76785	117.551
PbANKA_06_v3	285399	285936	538	285675	252	120.461	6.76227	117.472
PbANKA_04_v3	466516	467529	1014	466859	321	151.594	6.72629	148.352
[truncated: 519 more rows]
