# Supplementary material for: Coordinated regulation of gene expression in Plasmodium female gametocytes by two transcription factors
Source: eLife. 2024 Jan 22;12:RP88317. doi: 10.7554/eLife.88317 (PMC10945693; doi:10.7554/eLife.88317)
Supplement: Supplementary file 3. — (a) PFG target genes predicted from ChIP-seq peaks. (b) sAP2-FG target genes predicted from ChIP-seq peaks. [file elife-88317-supp3.xlsx]

## Sheet: 3a
Supplementary file 3a. PFG target genes predicted from ChIP-seq peaks.
ID	annotation	classification	classification 2
PBANKA_0712600	14-3-3 protein	signal
PBANKA_0917900	26S protease regulatory subunit 6A, putative	proteolysis
PBANKA_0303600	26S proteasome regulatory subunit RPN1, putative	proteolysis
PBANKA_1028700	26S proteasome regulatory subunit RPN13, putative	proteolysis
PBANKA_1329700	26S proteasome regulatory subunit RPN2, putative	proteolysis
PBANKA_1351800	26S proteasome regulatory subunit RPN3, putative	proteolysis
PBANKA_1423100	2-oxoisovalerate dehydrogenase subunit beta, mitochondrial, putative	mitochondria
PBANKA_0405400	40S ribosomal protein S12, putative	Protein biosynthesis
PBANKA_1135100	40S ribosomal protein S15, putative	Protein biosynthesis
PBANKA_1423600	40S ribosomal protein S16, putative	Protein biosynthesis
PBANKA_0522800	40S ribosomal protein S19, putative	Protein biosynthesis
PBANKA_1201900	40S ribosomal protein S20e, putative	Protein biosynthesis
PBANKA_1215600	40S ribosomal protein S3A, putative	Protein biosynthesis
PBANKA_0606200	41-3 protein, putative	other
PBANKA_1237200	50S ribosomal protein L17, apicoplast, putative	Protein biosynthesis
PBANKA_0819200	50S ribosomal protein L3, apicoplast, putative	Protein biosynthesis
PBANKA_0301700	5'-3' exonuclease, putative	other
PBANKA_0940600	5'-3' exoribonuclease 1, putative	other
PBANKA_0943600	60S acidic ribosomal protein P1, putative	Protein biosynthesis
PBANKA_1423500	60S ribosomal protein L13-2, putative	Protein biosynthesis
PBANKA_0717800	60S ribosomal protein L15, putative	Protein biosynthesis
PBANKA_1364200	60S ribosomal protein L17, putative	Protein biosynthesis
PBANKA_1354400	60S ribosomal protein L18, putative	Protein biosynthesis
PBANKA_1354500	60S ribosomal protein L18-2, putative	Protein biosynthesis
PBANKA_1229200	60S ribosomal protein L19, putative	Protein biosynthesis
PBANKA_1346700	60S ribosomal protein L23, putative	Protein biosynthesis
PBANKA_1407600	60S ribosomal protein L24, putative	Protein biosynthesis
PBANKA_0511900	60S ribosomal protein L3, putative	Protein biosynthesis
PBANKA_0503600	60S ribosomal protein L30e, putative	Protein biosynthesis
PBANKA_0804000	60S ribosomal protein L37, putative	Protein biosynthesis
PBANKA_1106700	60S ribosomal protein L4, putative	Protein biosynthesis
PBANKA_1019500	60S ribosomal protein L5, putative	Protein biosynthesis
PBANKA_1351900	60S ribosomal protein L6, putative	Protein biosynthesis
PBANKA_1019400	60S ribosomal protein L7-3, putative	Protein biosynthesis
PBANKA_1002100	6-cysteine protein P36	other
PBANKA_1359700	6-cysteine protein P47	female gametocyte	gametocyte
PBANKA_0909500	AAA family ATPase, putative	female gametocyte	zygote/ookinete development
PBANKA_1018100	ABC transporter G family member 2	transporter
PBANKA_1427300	ABC1 family, putative	transporter
PBANKA_0519800	acetyl-CoA transporter, putative	transporter
PBANKA_1014400	acid phosphatase, putative	other
PBANKA_1459300	actin I	female gametocyte	zygote/ookinete development
PBANKA_1103100	actin-depolymerizing factor 1	female gametocyte	zygote/ookinete development
PBANKA_1137500	actin-depolymerizing factor 2	female gametocyte	zygote/ookinete development
PBANKA_0929300	actin-related protein 2/3 complex subunit 1, putative	other
PBANKA_0209300	actin-related protein ARP1	other
PBANKA_0716600	acylated pleckstrin-homology domain-containing protein, putative	other
PBANKA_1427500	acyl-CoA binding protein, putative	other
PBANKA_1432400	acyl-CoA synthetase, putative	metabolism
PBANKA_0603300	acylphosphatase, putative	metabolism
PBANKA_0936100	acylphosphatase, putative	other
PBANKA_1301300	adenosine deaminase, putative	metabolism
PBANKA_1214200	AFG1-like ATPase, putative	mitochondria
PBANKA_1143600	alanine--tRNA ligase, putative	Protein biosynthesis
PBANKA_0522700	alpha tubulin 2	female gametocyte	zygote/ookinete development
PBANKA_1032400	alpha/beta hydrolase, putative	other
PBANKA_1318100	aminopeptidase P, putative	proteolysis
PBANKA_1123400	anaphase-promoting complex subunit 11, putative	proteolysis
PBANKA_1409900	AP-1 complex subunit mu-1, putative	protein transport
PBANKA_0214400	AP2 domain transcription factor AP2-L	other
PBANKA_1463000	AP2 domain transcription factor AP2-O3	female gametocyte	ganetocyte
PBANKA_0102900	AP2 domain transcription factor, putative	other
PBANKA_0939100	AP2 domain transcription factor, putative	other
PBANKA_0111800	AP-3 complex subunit beta, putative	protein transport
PBANKA_0214300	AP-4 complex subunit beta, putative	protein transport
PBANKA_0523500	AP-4 complex subunit sigma, putative	protein transport
PBANKA_0911500	apical exonemal protein, putative	other
PBANKA_0907700	apical polar ring protein APR1, putative	female gametocyte	zygote/ookinete development
PBANKA_1334800	apical polar ring protein APR2, putative	female gametocyte	zygote/ookinete development
PBANKA_1410950	apical ring associated protein 1	female gametocyte	zygote/ookinete development
PBANKA_1344700	apicoplast calcium binding protein 1, putative	other
PBANKA_0915600	aquaglyceroporin	transporter
PBANKA_1427100	aquaporin, putative	transporter
PBANKA_0917400	armadillo repeat protein PF16	other
PBANKA_0717000	arsenical pump-driving ATPase, putative	other
PBANKA_1449300	asparagine synthetase [glutamine-hydrolyzing]	metabolism
PBANKA_1428100	asparagine-rich antigen, putative	other
PBANKA_1009100	ataxin-2 like protein, putative	other
PBANKA_1441600	ataxin-3, putative	other
PBANKA_1110700	ATP synthase F0 subunit a-like protein, putative	mitochondria
PBANKA_1460600	ATP synthase subunit beta, mitochondrial	mitochondria
PBANKA_1232300	ATP synthase subunit O, mitochondrial, putative	mitochondria
PBANKA_0109600	ATP synthase-associated protein, putative	other
PBANKA_0907800	ATP synthase-associated protein, putative	other
PBANKA_1024800	ATP synthase-associated protein, putative	other
PBANKA_1217700	ATP-dependent RNA helicase DDX6	female gametocyte	translational repression
PBANKA_0505700	ATP-dependent RNA helicase ROK1, putative	other
PBANKA_1328300	ATP-dependent zinc metalloprotease FTSH, putative	proteolysis
PBANKA_0102400	AT-rich interactive domain-containing protein, putative	chromatin
PBANKA_1014300	autophagy protein 5, putative	other
PBANKA_1461400	bax inhibitor 1, putative	signal
PBANKA_1105200	BCNT domain-containing protein, putative	other
PBANKA_1439100	BRO1 domain-containing protein, putative	protein transport
PBANKA_1428900	bromodomain protein 2, putative	chromatin
PBANKA_0622200	bromodomain protein 6, putative	chromatin
PBANKA_0523600	BSD-domain protein, putative	other
PBANKA_0815900	BSD-domain protein, putative	other
PBANKA_0314200	calcium-dependent protein kinase 1	signal
PBANKA_1010600	calmodulin, putative	signal
PBANKA_1355500	casein kinase II beta chain, putative	other
PBANKA_1338000	CCR4-NOT transcription complex subunit 5, putative	mRNA regulation
PBANKA_1104200	CDGSH iron-sulfur domain-containing protein, putative	mitochondria
PBANKA_1236400	CDGSH iron-sulfur domain-containing protein, putative	mitochondria
PBANKA_1356300	CDT1-like protein, putative	other
PBANKA_1447200	CG2-related protein, putative	other
PBANKA_1219900	Cg7 protein, putative	other
PBANKA_1333700	cGMP-specific 3',5'-cyclic phosphodiesterase delta	signal
PBANKA_0942700	chromatin remodeling protein, putative	chromatin
PBANKA_0616600	citrate synthase, mitochondrial, putative	mitochondria
PBANKA_1015500	citrate synthase-like protein, putative	metabolism
PBANKA_1143100	CLAMP domain-containing protein, putative	other
PBANKA_1359500	cleavage stimulation factor subunit 1, putative	mRNA regulation
PBANKA_0713000	CLP1 P-loop domain-containing protein, putative	mRNA regulation
PBANKA_1450300	Clu domain-containing protein, putative	mitochondria
PBANKA_1014900	coatomer subunit beta, putative	protein transport
PBANKA_1222300	coatomer subunit epsilon, putative	other
PBANKA_1408500	coenzyme Q-binding protein COQ10 homolog, mitochondrial, putative	mitochondria
PBANKA_0301800	condensin-2 complex subunit H2, putative	chromatin
PBANKA_0612400	conserved Plasmodium protein, unknown function	female gametocyte	zygote/ookinete development
PBANKA_1302900	copper transporter, putative	transporter
PBANKA_0906600	coproporphyrinogen-III oxidase, putative	other
PBANKA_0943400	CPW-WPC family protein	female gametocyte	zygote/ookinete development
PBANKA_1015400	CPW-WPC family protein	female gametocyte	zygote/ookinete development
PBANKA_1123200	CPW-WPC family protein	female gametocyte	zygote/ookinete development
PBANKA_1128800	CPW-WPC family protein	female gametocyte	zygote/ookinete development
PBANKA_1218300	CPW-WPC family protein	female gametocyte	zygote/ookinete development
PBANKA_1245200	CPW-WPC family protein	female gametocyte	zygote/ookinete development
PBANKA_1346300	CPW-WPC family protein	female gametocyte	zygote/ookinete development
PBANKA_1352500	CPW-WPC family protein	female gametocyte	zygote/ookinete development
PBANKA_0614800	CRAL/TRIO domain-containing protein, putative	other
PBANKA_0821600	CRAL/TRIO domain-containing protein, putative	other
PBANKA_1125200	CRAL/TRIO domain-containing protein, putative	protein transport
PBANKA_0704900	crystalloid-specific PH domain-containing protein, putative	female gametocyte	zygote/ookinete development
PBANKA_0821100	CS domain protein, putative	other
PBANKA_1345500	CTLH domain-containing protein, putative	other
PBANKA_0107000	CUGBP Elav-like family member 1, putative	mRNA regulation
PBANKA_1128600	cullin-like protein, putative	proteolysis
PBANKA_0207500	cyclin-dependent kinases regulatory subunit, putative	signal
PBANKA_0401300	cysteine desulfurase IscS, putative	mitochondria
PBANKA_0903700	cysteine-rich PDZ-binding protein, putative	other
PBANKA_1453300	cytidine and deoxycytidylate deaminase, putative	metabolism
PBANKA_0718700	cytochrome b5, putative	mitochondria
PBANKA_0506700	cytochrome b-c1 complex subunit 8, putative	mitochondria
PBANKA_1412000	cytochrome c oxidase assembly protein COX19, putative	mitochondria
PBANKA_1223200	cytochrome c oxidase subunit 6A, putative	mitochondria
PBANKA_0211300	cytochrome c oxidase subunit ApiCOX14, putative	mitochondria
PBANKA_1447000	cytochrome c oxidase subunit ApiCOX19, putative	mitochondria
PBANKA_0404400	cytochrome c oxidase subunit NDUFA4, putative	mitochondria
PBANKA_0600800	cytochrome c1 heme lyase	mitochondria
PBANKA_1328400	cytochrome c1, heme protein, mitochondrial, putative	mitochondria
PBANKA_0504500	cytoplasmic dynein intermediate chain, putative	protein transport
PBANKA_0811900	cytosolic Fe-S cluster assembly factor NBP35, putative	other
PBANKA_0607800	cytosolic iron-sulfur protein assembly protein 1, putative	other
PBANKA_1339700	DEAD box helicase, putative	other
PBANKA_0104000	deoxyribose-phosphate aldolase, putative	metabolism
PBANKA_1331800	derlin-1, putative	protein transport
PBANKA_1352800	dicarboxylate/tricarboxylate carrier, putative	mitochondria
PBANKA_1039700	dihydrolipoyllysine-residue succinyltransferase component of 2-oxoglutarate dehydrogenase complex, putative	mitochondria
PBANKA_0819700	dihydrouridine synthase, putative	other
PBANKA_1141900	DIP13 homolog, putative	female gametocyte	zygote/ookinete development
PBANKA_0931300	dipeptidyl aminopeptidase 1, putative	proteolysis
PBANKA_1460700	dipeptidyl aminopeptidase 2	proteolysis
PBANKA_0211400	DNA (cytosine-5)-methyltransferase, putative	other
PBANKA_1454000	DNA gyrase subunit B, putative	DNA replication and repair
PBANKA_0609800	DNA helicase MCM8, putative	DNA replication and repair
PBANKA_1226800	DNA repair and recombination protein RAD54, putative	DNA replication and repair
PBANKA_0939500	DNA repair protein RAD51	DNA replication and repair
PBANKA_0610200	DNA replication licensing factor MCM5, putative	DNA replication and repair
PBANKA_1141400	DNA topoisomerase 6 subunit B, putative	DNA replication and repair
PBANKA_0404100	DNA-(apurinic or apyrimidinic site) endonuclease, putative	other
PBANKA_1204300	DNA/RNA-binding protein Alba 3, putative	female gametocyte	translational repression
PBANKA_1119700	DNA/RNA-binding protein Alba 4, putative	mRNA regulation
PBANKA_0401900	DNA-directed RNA polymerases I, II, and III subunit RPABC2, putative	Protein biosynthesis
PBANKA_0706800	DnaJ protein, putative	Protein biosynthesis
PBANKA_1201200	DnaJ protein, putative	Protein biosynthesis
PBANKA_1345300	DnaJ protein, putative	Protein biosynthesis
PBANKA_1245150	dolichol-phosphate mannosyltransferase subunit 3, putative	Protein biosynthesis
PBANKA_0409600	dolichyl-diphosphooligosaccharide--protein glycosyltransferase subunit OST1, putative	Protein biosynthesis
PBANKA_0938700	D-tyrosyl-tRNA(Tyr) deacylase, putative	other
PBANKA_0621000	dynactin subunit 5, putative	protein transport
PBANKA_0712500	dynactin subunit 6, putative	protein transport
PBANKA_0214000	dynein heavy chain, putative	protein transport
PBANKA_0517000	early transcribed membrane protein	other
PBANKA_1038800	EGF domain-containing protein, putative	signal
PBANKA_0205000	ELM2 domain-containing protein, putative	other
PBANKA_1314800	elongation factor 2, putative	Protein biosynthesis
PBANKA_1345600	elongation factor Tu, putative	Protein biosynthesis
PBANKA_0936000	endonuclease/exonuclease/phosphatase family protein, putative	other
PBANKA_0818900	endoplasmic reticulum chaperone BiP, putative	Protein biosynthesis
PBANKA_0924300	endoplasmic reticulum oxidoreductin, putative	Protein biosynthesis
PBANKA_0938400	endoplasmic reticulum-resident calcium binding protein, putative	protein transport
PBANKA_1229800	enoyl-acyl carrier reductase	other
PBANKA_1345400	ER lumen protein retaining receptor 1, putative	protein transport
PBANKA_1430200	ER membrane protein complex subunit 6, putative	protein transport
PBANKA_0909100	ER membrane protein complex subunit 8, putative	protein transport
PBANKA_1020900	ERAD-associated E3 ubiquitin-protein ligase HRD1, putative	proteolysis
PBANKA_0301200	ERCC1 nucleotide excision repair protein, putative	DNA replication and repair
PBANKA_0914100	erythrocyte membrane and merozoite antigen EMMA1, putative	other
PBANKA_0522600	erythrocyte membrane-associated antigen, putative	other
PBANKA_0937800	essential nuclear protein 1, putative	other
PBANKA_1411300	eukaryotic translation initation factor 4 gamma, putative	Protein biosynthesis
PBANKA_0212100	eukaryotic translation initiation factor 2 subunit alpha	Protein biosynthesis
PBANKA_1242800	eukaryotic translation initiation factor 3 subunit E, putative	Protein biosynthesis
PBANKA_0110400	eukaryotic translation initiation factor 3 subunit L, putative	Protein biosynthesis
PBANKA_1351100	exoribonuclease, putative	other
PBANKA_1007800	exosome complex component RRP4, putative	other
PBANKA_0509000	exported protein 3, putative	other
PBANKA_1232400	F-actin-capping protein subunit beta	female gametocyte	zygote/ookinete development
PBANKA_1303500	FAD-dependent glycerol-3-phosphate dehydrogenase, putative	mitochondria
PBANKA_0602600	FAD-dependent monooxygenase, putative	mitochondria
PBANKA_0600400	fam-a protein	other
PBANKA_1100900	fam-a protein	other
PBANKA_1326300	ferredoxin, putative	mitochondria
PBANKA_0504300	flagellar outer arm dynein-associated protein, putative	other
PBANKA_1006100	flap endonuclease 1, putative	DNA replication and repair
PBANKA_0706700	fumarate hydratase, putative	mitochondria
PBANKA_0902300	gamete egress and sporozoite traversal protein	female gametocyte	gametocyte
PBANKA_1204400	gamete egress protein GEP	female gametocyte	gametocyte
PBANKA_1455800	GAS8-like protein, putative	other
PBANKA_0815800	GINS complex subunit Psf3, putative	DNA replication and repair
PBANKA_1338900	glideosome associated protein with multiple membrane spans 1, putative	female gametocyte	zygote/ookinete development
PBANKA_0523900	glideosome associated protein with multiple membrane spans 2, putative	female gametocyte	zygote/ookinete development
PBANKA_1035400	glideosome associated protein with multiple membrane spans 3, putative	female gametocyte	zygote/ookinete development
PBANKA_1115300	glideosome-associated protein 40, putative	female gametocyte	zygote/ookinete development
PBANKA_1437600	glideosome-associated protein 45, putative	female gametocyte	zygote/ookinete development
PBANKA_0819000	glideosome-associated protein 50, putative	female gametocyte	zygote/ookinete development
PBANKA_1457300	glucose inhibited division protein a homologue, putative	other
PBANKA_0513600	glutamate dehydrogenase, putative	metabolism
PBANKA_0407600	glutamine synthetase, putative	metabolism
PBANKA_0107800	glutamine--fructose-6-phosphate aminotransferase [isomerizing], putative	metabolism
PBANKA_1346600	glutamine--tRNA ligase, putative	Protein biosynthesis
PBANKA_1127500	glutamyl-tRNA(Gln) amidotransferase subunit B, putative	Protein biosynthesis
PBANKA_0404700	glutaredoxin 1, putative	other
PBANKA_1362200	glycerol kinase, putative	metabolism
PBANKA_0505800	glycerol-3-phosphate 1-O-acyltransferase	metabolism
PBANKA_1228200	glycogen synthase kinase 3, putative	metabolism
PBANKA_0609300	GPI mannosyltransferase 1, putative	Protein biosynthesis
PBANKA_1345700	GPI transamidase subunit PIG-U, putative	Protein biosynthesis
PBANKA_0403700	GRIP domain-containing protein, putative	other
PBANKA_1106300	GTPase-activating protein, putative	signal
PBANKA_1225700	GTPase-activating protein, putative	signal
PBANKA_1341300	GTPase-activating protein, putative	signal
PBANKA_0930300	GTP-binding nuclear protein RAN/TC4, putative	signal
PBANKA_0716700	GTP-binding protein, putative	signal
PBANKA_0812800	GTP-binding protein, putative	signal
PBANKA_1322800	GTP-binding protein, putative	signal
PBANKA_1214000	heat shock protein 60, putative	Protein biosynthesis
PBANKA_0711900	heat shock protein 70	Protein biosynthesis
PBANKA_0805700	heat shock protein 90, putative	Protein biosynthesis
PBANKA_1126800	HECT domain-containing protein 1, putative	proteolysis
PBANKA_1448800	helicase, putative	other
PBANKA_0516800	heptatricopeptide repeat-containing protein HPR1	other
PBANKA_0907000	heptatricopeptide repeat-containing protein, putative	other
PBANKA_1208300	heptatricopeptide repeat-containing protein, putative	other
PBANKA_1238000	heptatricopeptide repeat-containing protein, putative	other
PBANKA_0601900	high mobility group protein B1, putative	chromatin
PBANKA_0712900	high mobility group protein B2	chromatin
PBANKA_0830200	high molecular weight rhoptry protein 2	other
PBANKA_1206200	histone deacetylase 2, putative	chromatin
PBANKA_1117000	histone H2A, putative	chromatin
PBANKA_1420600	histone H2B variant, putative	chromatin
PBANKA_0941800	histone H2B, putative	chromatin
PBANKA_1117100	histone H3 variant, putative	chromatin
PBANKA_0108800	histone H3, putative	chromatin
PBANKA_0941900	histone H4, putative	chromatin
PBANKA_1312400	HSP20-like chaperone, putative	Protein biosynthesis
PBANKA_1463900	HSP20-like chaperone, putative	Protein biosynthesis
PBANKA_1220500	hydrolase, putative	other
PBANKA_1204200	IMP1-like protein, putative	other
PBANKA_0907100	inner membrane complex protein 1b	female gametocyte	zygote/ookinete development
PBANKA_1202000	inner membrane complex protein 1c	female gametocyte	zygote/ookinete development
PBANKA_1219100	inner membrane complex protein 1d	female gametocyte	zygote/ookinete development
PBANKA_0402700	inner membrane complex protein 1e	female gametocyte	zygote/ookinete development
PBANKA_0707100	inner membrane complex protein 1i	female gametocyte	zygote/ookinete development
PBANKA_1120400	inner membrane complex protein 1j, putative	female gametocyte	zygote/ookinete development
PBANKA_0513000	inner membrane complex protein 1m, putative	female gametocyte	zygote/ookinete development
PBANKA_1311300	inner membrane complex protein, putative	female gametocyte	zygote/ookinete development
PBANKA_1209400	inner membrane complex sub-compartment protein 1	female gametocyte	zygote/ookinete development
PBANKA_1324300	inner membrane complex sub-compartment protein 3	female gametocyte	zygote/ookinete development
PBANKA_0823500	inorganic pyrophosphatase, putative	metabolism
PBANKA_0509300	inorganic pyrophosphatase, putative	metabolism
PBANKA_1364300	inosine-5'-monophosphate dehydrogenase, putative	metabolism
PBANKA_1429300	integral membrane protein GPR180, putative	other
PBANKA_1419100	isocitrate dehydrogenase [NADP], mitochondrial, putative	mitochondria
PBANKA_1123500	ISWI chromatin-remodeling complex ATPase, putative	chromatin
PBANKA_1425100	karyopherin alpha, putative	protein transport
PBANKA_1238800	karyopherin beta, putative	protein transport
PBANKA_1458300	kinesin-13, putative	protein transport
PBANKA_1208200	kinesin-4, putative	protein transport
PBANKA_0805900	kinesin-8X	other
PBANKA_0609500	kinesin-X3, putative	female gametocyte	zygote/ookinete development
PBANKA_0902400	kinesin-X4, putative	female gametocyte	zygote/ookinete development
PBANKA_1115700	kinetochore protein NDC80	chromatin
PBANKA_1013500	large subunit GTPase 1, putative	signal
PBANKA_0417600	LCCL domain-containing protein	female gametocyte	zygote/ookinete development
PBANKA_1035200	LCCL domain-containing protein	female gametocyte	zygote/ookinete development
PBANKA_1300700	LCCL domain-containing protein	female gametocyte	zygote/ookinete development
PBANKA_1319500	LCCL domain-containing protein	female gametocyte	zygote/ookinete development
PBANKA_0204500	LCCL domain-containing protein, putative	female gametocyte	zygote/ookinete development
PBANKA_0617000	LEM3/CDC50 family protein, putative	other
PBANKA_0605800	LIMP protein	other
PBANKA_0101100	liver merozoite formation protein	other
PBANKA_0610100	lysine-specific histone demethylase 1, putative	chromatin
PBANKA_1228300	lysine-specific histone demethylase, putative	chromatin
PBANKA_1025900	lysine--tRNA ligase, putative	Protein biosynthesis
PBANKA_0833100	M18 aspartyl aminopeptidase, putative	proteolysis
PBANKA_1321000	MA3 domain-containing protein, putative	Protein biosynthesis
PBANKA_0703000	magnesium transporter, putative	transporter
PBANKA_0817000	major facilitator superfamily domain-containing protein, putative	transporter
PBANKA_1231300	major facilitator superfamily domain-containing protein, putative	transporter
PBANKA_0208400	major facilitator superfamily-related transporter, putative	transporter
PBANKA_0815700	major facilitator superfamily-related transporter, putative	transporter
PBANKA_0404800	malate dehydrogenase, putative	mitochondria
PBANKA_1360300	male development gene 1	female gametocyte	gametocyte
PBANKA_1416700	mannose-1-phosphate guanyltransferase, putative	metabolism
PBANKA_1326600	mediator of RNA polymerase II transcription subunit 20, putative	Protein biosynthesis
PBANKA_1325200	meiotic nuclear division protein 1, putative	female gametocyte	zygote/ookinete development
PBANKA_0714000	meiotic recombination protein DMC1	female gametocyte	zygote/ookinete development
PBANKA_1432700	meiotic recombination protein SPO11, putative	female gametocyte	zygote/ookinete development
PBANKA_0511700	meiotic recombination protein SPO11-2, putative	female gametocyte	zygote/ookinete development
PBANKA_1131400	metacaspase-1	proteolysis
PBANKA_1207800	metalloprotease, putative	proteolysis
PBANKA_0518700	methionine--tRNA ligase, putative	Protein biosynthesis
PBANKA_0405600	microtubule-associated protein RP/EB family, putative	female gametocyte	zygote/ookinete development
PBANKA_1422300	mitochondrial carrier protein, putative	mitochondria
PBANKA_1416600	mitochondrial import inner membrane translocase subunit TIM10, putative	mitochondria
PBANKA_0828100	mitochondrial import receptor subunit TOM40, putative	mitochondria
PBANKA_1358600	mitochondrial import receptor subunit TOM7, putative	mitochondria
PBANKA_1117700	mitochondrial inner membrane protein OXA1, putative	mitochondria
PBANKA_0205100	mitochondrial pyruvate carrier protein 1, putative	mitochondria
PBANKA_0607100	mitochondrial respiratory chain complex II subunit, putative	mitochondria
PBANKA_1116500	mitochondrial-processing peptidase subunit alpha, putative	mitochondria
PBANKA_0720900	MOLO1 domain-containing protein, putative	other
PBANKA_0401700	mRNA-binding protein PUF1	mRNA regulation
PBANKA_1349200	MSP7-like protein	other
PBANKA_1443800	multidrug resistance-associated protein 2	other
PBANKA_1034700	multifunctional methyltransferase subunit TRM112, putative	other
PBANKA_1135700	multiple RNA-binding domain-containing protein 1, putative	mRNA regulation
PBANKA_0908500	myosin K	other
PBANKA_0929400	myosin light chain B	female gametocyte	zygote/ookinete development
PBANKA_1317200	NAD(P) transhydrogenase	female gametocyte	zygote/ookinete development
PBANKA_1457400	N-alpha-acetyltransferase 15, NatA auxiliary subunit, putative	other
PBANKA_1447400	Nd9 protein, putative	other
PBANKA_0401600	N-ethylmaleimide-sensitive fusion protein, putative	protein transport
PBANKA_0600600	NIMA related kinase 3, putative	signal
PBANKA_0616700	NIMA related kinase 4	female gametocyte	zygote/ookinete development
PBANKA_1115500	NLI interacting factor-like phosphatase	other
PBANKA_1403300	NLI interacting factor-like phosphatase	other
PBANKA_0601600	nuclear export mediator factor NEMF, putative	other
PBANKA_1030300	nuclear transport factor 2, putative	other
PBANKA_0300700	nucleic acid-binding protein, putative	other
PBANKA_1220000	nucleic acid-binding protein, putative	other
PBANKA_1142400	nucleoside diphosphate kinase b, putative	other
PBANKA_0602700	nucleosome assembly protein, putative	chromatin
PBANKA_0410400	octaprenyl pyrophosphate synthase, putative	metabolism
PBANKA_0407300	OMD protein	other
PBANKA_0905200	oocyst capsule protein Cap93	other
PBANKA_0902500	oocyst rupture protein 1	other
PBANKA_0515000	ookinete surface protein P25	female gametocyte	zygote/ookinete development
PBANKA_0514900	ookinete surface protein P28	female gametocyte	zygote/ookinete development
PBANKA_1312700	osmiophilic body protein G377	female gametocyte	gametocyte
PBANKA_0515350	OTU-like cysteine protease, putative	other
PBANKA_0402000	palmitoyltransferase DHHC1, putative	female gametocyte	zygote/ookinete development
PBANKA_0512000	palmitoyltransferase DHHC10	female gametocyte	zygote/ookinete development
PBANKA_0108300	palmitoyltransferase DHHC2	female gametocyte	zygote/ookinete development
PBANKA_0824900	patatin-like phospholipase, putative	other
PBANKA_1448000	pentatricopeptide repeat domain-containing protein 2, putative	other
PBANKA_0502600	peptidase, putative	proteolysis
PBANKA_1115200	perforin-like protein 2	female gametocyte	gametocyte
PBANKA_0417200	PH domain-containing protein	Protein biosynthesis
PBANKA_0408300	phd finger protein, putative	other
PBANKA_0942900	phenylalanine--tRNA ligase beta subunit, putative	Protein biosynthesis
PBANKA_0704800	PH-like domain-containing protein, putative	female gametocyte	zygote/ookinete development
PBANKA_0902900	PH-like domain-containing protein, putative	female gametocyte	zygote/ookinete development
PBANKA_1231200	phosducin-like protein 1, putative	other
PBANKA_1434000	phosphate translocator, putative	other
PBANKA_0402500	phosphatidylethanolamine-binding protein, putative	other
PBANKA_0414100	phosphatidylglycerophosphate synthase, putative	metabolism
PBANKA_1449800	phosphatidylinositol 3- and 4-kinase, putative	metabolism
PBANKA_0907600	phosphatidylinositol N-acetylglucosaminyltransferase subunit H, putative	Protein biosynthesis
PBANKA_0821700	phosphatidylinositol-4-phosphate 5-kinase, putative	metabolism
PBANKA_1210900	phosphoglucomutase, putative	female gametocyte	zygote/ookinete development
PBANKA_1022300	phosphoglycerate mutase, putative	metabolism
PBANKA_0300800	phosphoglycolate phosphatase	metabolism
PBANKA_1130800	phosphoinositide phosphatase SAC1, putative	other
PBANKA_1351400	phosphoinositide-binding protein PH2, putative	other
PBANKA_1211900	phosphoinositide-specific phospholipase C	other
PBANKA_0710600	phospholipase DDHD1, putative	metabolism
PBANKA_0506900	phospholipid scramblase, putative	other
PBANKA_1422900	PIMMS22 protein	female gametocyte	zygote/ookinete development
PBANKA_1034400	plasmepsin IV	proteolysis
PBANKA_0409700	plasmepsin VI, putative	proteolysis
PBANKA_0517600	plasmepsin VII	proteolysis
PBANKA_1329100	plasmepsin VIII	proteolysis
PBANKA_1222500	plasmepsin X, putative	proteolysis
PBANKA_0524700	Plasmodium exported protein, unknown function	other
PBANKA_1400700	Plasmodium exported protein, unknown function	other
PBANKA_0202500	P-loop containing nucleoside triphosphate hydrolase, putative	other
PBANKA_1439200	polyadenylate-binding protein 1, putative	Protein biosynthesis
PBANKA_0610300	polyubiquitin, putative	proteolysis
PBANKA_0612600	PP-loop family protein, putative	other
PBANKA_1111600	prefoldin subunit 6, putative	Protein biosynthesis
PBANKA_1415000	pre-mRNA-processing factor 40, putative	Protein biosynthesis
PBANKA_1452800	pre-mRNA-splicing factor CWC22, putative	Protein biosynthesis
PBANKA_0522900	pre-mRNA-splicing helicase BRR2, putative	Protein biosynthesis
PBANKA_0830700	procollagen lysine 5-dioxygenase, putative	other
PBANKA_1220300	prodrug activation and resistance esterase, putative	other
PBANKA_0706900	prohibitin 2	mitochondria
PBANKA_1016300	proliferation-associated protein 2g4, putative	signal
PBANKA_0621100	proteasome assembly chaperone 4, putative	proteolysis
PBANKA_0211500	proteasome subunit alpha type-5, putative	proteolysis
PBANKA_0832600	proteasome subunit beta type-6, putative	proteolysis
PBANKA_0620600	protein CPH1, putative	other
PBANKA_0925800	protein KIC10, putative	other
PBANKA_0815400	protein KIC3, putative	other
PBANKA_0826900	protein kinase, putative	signal
PBANKA_1414500	protein kinase, putative	signal
PBANKA_0702300	protein MPODD	mitochondria
PBANKA_1222200	protein MPODD	mitochondria
PBANKA_0607400	protein phosphatase PPM11, putative	other
PBANKA_0910200	protein phosphatase PPM2	other
PBANKA_1026600	protein SEY1, putative	other
PBANKA_1002800	protein transport protein Sec24B, putative	protein transport
PBANKA_1436800	protein TSSC1, putative	other
PBANKA_1318800	protein tyrosine phosphatase	other
PBANKA_1234100	protoheme IX farnesyltransferase, putative	other
PBANKA_1343900	PUB domain-containing protein, putative	other
PBANKA_1346800	Qa-SNARE protein, putative	protein transport
PBANKA_0621500	Rab GTPase activator and protein kinase, putative	signal
PBANKA_1456200	rab specific GDP dissociation inhibitor, putative	other
PBANKA_1434900	raf kinase inhibitor, putative	signal
PBANKA_1130000	Ran-binding protein, putative	signal
PBANKA_0721700	ran-specific GTPase-activating protein 1, putative	protein transport
PBANKA_1120600	RAP protein, putative	protein transport
PBANKA_1334500	RAP protein, putative	protein transport
PBANKA_1418900	ras-related protein Rab-11A	protein transport
PBANKA_1354100	ras-related protein Rab-11B, putative	protein transport
PBANKA_1113500	ras-related protein Rab-1A, putative	protein transport
PBANKA_1445800	ras-related protein Rab-2, putative	protein transport
PBANKA_0703900	receptor for activated c kinase, putative	signal
PBANKA_1203700	regulator of nonsense transcripts 1, putative	Protein biosynthesis
PBANKA_1342900	regulator of nonsense transcripts 3B, putative	Protein biosynthesis
PBANKA_1354200	respiratory chain complex 2 associated protein 2, putative	mitochondria
PBANKA_1444300	respiratory chain complex 2 associated protein 4, putative	mitochondria
PBANKA_1237900	respiratory chain complex 3 associated protein 3, putative	mitochondria
PBANKA_1213100	respiratory chain complex 4 associated protein 4, putative	mitochondria
PBANKA_0702700	rhomboid protease ROM3	female gametocyte	zygote/ookinete development
PBANKA_0713100	rhoptry neck protein 5	other
PBANKA_1135400	riboflavin kinase, putative	other
PBANKA_1342400	ribonuclease P protein subunit RPR2, putative	other
PBANKA_0409300	ribonucleoside-diphosphate reductase small chain, putative	metabolism
PBANKA_1036600	ribonucleoside-diphosphate reductase small chain, putative	other
PBANKA_1015000	ribosomal protein L15, mitochondrial, putative	Protein biosynthesis
PBANKA_1427400	ribosomal protein L33, apicoplast, putative	Protein biosynthesis
PBANKA_1039400	ribosomal protein S27a, putative	Protein biosynthesis
PBANKA_1026900	ribosomal RNA small subunit methyltransferase A1, putative	Protein biosynthesis
PBANKA_1143500	ribosome biogenesis protein MRT4, putative	Protein biosynthesis
PBANKA_0822700	ribosome production factor 1, putative	Protein biosynthesis
PBANKA_1201600	ribosome-binding factor A, putative	Protein biosynthesis
PBANKA_0925000	RING zinc finger protein, putative	zinc finger protein
PBANKA_1348700	RING zinc finger protein, putative	zinc finger protein
PBANKA_1357900	RING zinc finger protein, putative	zinc finger protein
PBANKA_0914600	RNA (uracil-5-)methyltransferase, putative	Protein biosynthesis
PBANKA_1354000	RNA lariat debranching enzyme, putative	other
PBANKA_1305800	RNA polymerase II transcription factor B subunit 5, putative	Protein biosynthesis
PBANKA_0516700	RNA polymerase II-associated protein 1, putative	Protein biosynthesis
PBANKA_1432800	RNA-binding protein, putative	mRNA regulation
PBANKA_0828400	RNA-binding protein, putative	mRNA regulation
PBANKA_1015300	rRNA (adenosine-2'-O-)-methyltransferase, putative	Protein biosynthesis
PBANKA_0310800	RTR1 domain-containing protein, putative	other
PBANKA_1414900	SAS6-like protein	female gametocyte	zygote/ookinete development
PBANKA_0306900	Sec61-gamma subunit of protein translocation complex, putative	protein transport
PBANKA_1113400	secreted ookinete protein	female gametocyte	zygote/ookinete development
PBANKA_0619200	secreted ookinete protein, putative	female gametocyte	zygote/ookinete development
PBANKA_1129000	secreted ookinete protein, putative	female gametocyte	zygote/ookinete development
PBANKA_1233600	secreted ookinete protein, putative	female gametocyte	zygote/ookinete development
PBANKA_1421700	secreted ookinete protein, putative	female gametocyte	zygote/ookinete development
PBANKA_1434400	secreted ookinete protein, putative	female gametocyte	zygote/ookinete development
PBANKA_1448500	sentrin-specific protease 1, putative	proteolysis
PBANKA_1027000	serine palmitoyltransferase, putative	other
PBANKA_1232100	serine/arginine-rich splicing factor 1, putative	other
PBANKA_0104100	serine/threonine protein kinase ARK1, putative	signal
PBANKA_0407400	serine/threonine protein kinase ARK2, putative	signal
PBANKA_1313700	serine/threonine protein kinase, putative	signal
PBANKA_1460500	serine/threonine protein kinase, putative	signal
PBANKA_1227400	serine/threonine protein phosphatase 2B catalytic subunit A	signal
PBANKA_1131900	serine/threonine protein phosphatase 5	signal
PBANKA_0502500	serine/threonine protein phosphatase 8	signal
PBANKA_1432200	sexual stage-specific protein G37	female gametocyte	gametocyte
PBANKA_1346200	signal peptidase complex catalytic subunit SEC11, putative	protein transport
PBANKA_1217800	signal peptidase complex subunit 2, putative	protein transport
PBANKA_1320700	signal peptide peptidase, putative	protein transport
PBANKA_1459900	signal recognition particle receptor subunit beta, putative	protein transport
PBANKA_0718800	small GTP-binding protein sar1, putative	signal
PBANKA_0708400	small nuclear ribonucleoprotein G, putative	Protein biosynthesis
PBANKA_0608500	SNARE protein, putative	protein transport
PBANKA_0704000	SNARE protein, putative	protein transport
PBANKA_1312300	SNARE protein, putative	protein transport
PBANKA_1315500	sortilin, putative	protein transport
PBANKA_0106200	spindle assembly abnormal protein 6	other
PBANKA_0928800	splicing factor U2AF small subunit, putative	Protein biosynthesis
PBANKA_1122500	splicing factor-like protein 1, putative	Protein biosynthesis
PBANKA_0918600	stearoyl-CoA desaturase, putative	metabolism
PBANKA_0716000	structural maintenance of chromosomes protein 3, putative	chromatin
PBANKA_0810700	subpellicular microtubule protein 1, putative	female gametocyte	zygote/ookinete development
PBANKA_1445000	subpellicular microtubule protein 2, putative	female gametocyte	zygote/ookinete development
PBANKA_1107000	subtilisin propeptide-like protein, putative	proteolysis
PBANKA_1107100	subtilisin-like protease 1	proteolysis
PBANKA_1106800	subtilisin-like protease 3, putative	proteolysis
PBANKA_1013200	succinate--CoA ligase [ADP-forming] subunit beta, putative	other
PBANKA_0313300	sugar transporter, putative	transporter
PBANKA_1122400	superoxide dismutase [Fe], putative	other
PBANKA_1419200	SURP domain-containing protein, putative	mRNA regulation
PBANKA_0605100	Tat binding protein 1(TBP-1)-interacting protein, putative	female gametocyte	zygote/ookinete development
PBANKA_0310900	T-complex protein 1 subunit theta, putative	Protein biosynthesis
PBANKA_1412600	telomerase reverse transcriptase	chromatin
PBANKA_0607700	telomere repeat-binding zinc finger protein, putative	chromatin
PBANKA_0825700	telomeric repeat binding factor 1, putative	chromatin
PBANKA_0827300	tetratricopeptide repeat protein, putative	other
PBANKA_0604300	tetratricopeptide repeat protein, putative	Protein biosynthesis
PBANKA_1444800	thioredoxin-like associated protein 1, putative	female gametocyte	zygote/ookinete development
PBANKA_1365200	thioredoxin-related protein, putative	other
PBANKA_0602500	threonylcarbamoyl-AMP synthase, putative	Protein biosynthesis
PBANKA_1337500	TOG domain-containing protein, putative	chromatin
PBANKA_1110100	topoisomerase I, putative	DNA replication and repair
PBANKA_1123100	trailer hitch homolog	female gametocyte	translational repression
PBANKA_0614100	transcription initiation factor IIA subunit 1, putative	Protein biosynthesis
PBANKA_0904400	transcription initiation factor IIF subunit beta, putative	Protein biosynthesis
PBANKA_0202900	transcription initiation factor TFIIB, putative	Protein biosynthesis
PBANKA_1456900	translation initiation factor SUI1, putative	Protein biosynthesis
PBANKA_0302000	translocation protein SEC66, putative	protein transport
PBANKA_0941300	translocon component PTEX88	protein transport
PBANKA_1138300	transmembrane and coiled-coil domain-containing protein 1, putative	other
PBANKA_1334700	transmembrane protein 43, putative	other
PBANKA_1406400	tripartite motif protein, putative	other
PBANKA_0921100	tRNA (guanine-N(7)-)-methyltransferase, putative	Protein biosynthesis
PBANKA_1033600	tRNA-dihydrouridine synthase, putative	Protein biosynthesis
PBANKA_1350700	tryptophan--tRNA ligase, putative	Protein biosynthesis
PBANKA_1206900	tubulin beta chain, putative	female gametocyte	zygote/ookinete development
PBANKA_1214100	tubulin binding cofactor c, putative	female gametocyte	zygote/ookinete development
PBANKA_1300500	tubulin epsilon chain, putative	female gametocyte	zygote/ookinete development
PBANKA_0901900	tubulin--tyrosine ligase, putative	female gametocyte	zygote/ookinete development
PBANKA_1113700	tubulin--tyrosine ligase, putative	female gametocyte	zygote/ookinete development
PBANKA_1208000	tubulin--tyrosine ligase, putative	female gametocyte	zygote/ookinete development
PBANKA_0912300	tudor staphylococcal nuclease, putative	other
PBANKA_1362100	tyrosine kinase-like protein, putative	signal
PBANKA_1227100	U3 small nucleolar RNA-associated protein 14, putative	Protein biosynthesis
PBANKA_0821800	U4/U6 snRNA-associated-splicing factor, putative	Protein biosynthesis
PBANKA_0210600	ubiquitin carboxyl-terminal hydrolase, putative	proteolysis
PBANKA_1028000	ubiquitin carboxyl-terminal hydrolase, putative	proteolysis
PBANKA_0602800	ubiquitin-conjugating enzyme E2, putative	proteolysis
PBANKA_0821900	ubiquitin-conjugating enzyme E2, putative	proteolysis
PBANKA_1233500	upregulated in late gametocytes ULG8, putative	female gametocyte	zygote/ookinete development
PBANKA_0408400	uroporphyrinogen-III synthase, putative	metabolism
PBANKA_1421300	UTP--glucose-1-phosphate uridylyltransferase, putative	metabolism
PBANKA_0911300	UVB-resistance protein UVR8 homologue, putative	other
PBANKA_0937100	vacuolar protein sorting-associated protein 35, putative	protein transport
PBANKA_0313100	vacuolar protein sorting-associated protein 45, putative	protein transport
PBANKA_1305700	vacuolar protein sorting-associated protein 60, putative	protein transport
PBANKA_1234000	V-type proton ATPase 16 kDa proteolipid subunit, putative	other
PBANKA_1405100	V-type proton ATPase subunit H, putative	other
PBANKA_0926900	WD repeat-containing protein, putative	other
PBANKA_1016500	WW domain-binding protein 11, putative	mRNA regulation
PBANKA_0712300	zinc finger protein, putative	proteolysis
PBANKA_0503500	zinc finger protein, putative	zinc finger protein
PBANKA_0604200	zinc finger protein, putative	zinc finger protein
PBANKA_1134900	zinc finger protein, putative	zinc finger protein
PBANKA_1225300	zinc finger protein, putative	zinc finger protein
PBANKA_1237600	zinc finger protein, putative	zinc finger protein
PBANKA_1239800	zinc finger protein, putative	zinc finger protein
PBANKA_1327800	zinc finger protein, putative	zinc finger protein
PBANKA_1435200	zinc finger protein, putative	zinc finger protein
PBANKA_1341900	conserved Apicomplexan protein, unknown function	unknown
PBANKA_1239000	conserved Plasmodium membrane protein, unknown function	unknown
PBANKA_0104500	conserved Plasmodium protein, unknown function	unknown
PBANKA_0105100	conserved Plasmodium protein, unknown function	unknown
PBANKA_0105300	conserved Plasmodium protein, unknown function	unknown
PBANKA_0110100	conserved Plasmodium protein, unknown function	unknown
PBANKA_0110800	conserved Plasmodium protein, unknown function	unknown
PBANKA_0111300	conserved Plasmodium protein, unknown function	unknown
PBANKA_0203600	conserved Plasmodium protein, unknown function	unknown
PBANKA_0212000	conserved Plasmodium protein, unknown function	unknown
PBANKA_0301100	conserved Plasmodium protein, unknown function	unknown
PBANKA_0301600	conserved Plasmodium protein, unknown function	unknown
PBANKA_0305500	conserved Plasmodium protein, unknown function	unknown
PBANKA_0307400	conserved Plasmodium protein, unknown function	unknown
PBANKA_0309200	conserved Plasmodium protein, unknown function	unknown
PBANKA_0309400	conserved Plasmodium protein, unknown function	unknown
PBANKA_0311500	conserved Plasmodium protein, unknown function	unknown
PBANKA_0406000	conserved Plasmodium protein, unknown function	unknown
PBANKA_0413200	conserved Plasmodium protein, unknown function	unknown
PBANKA_0413500	conserved Plasmodium protein, unknown function	unknown
PBANKA_0502000	conserved Plasmodium protein, unknown function	unknown
PBANKA_0502650	conserved Plasmodium protein, unknown function	unknown
PBANKA_0504400	conserved Plasmodium protein, unknown function	unknown
PBANKA_0505400	conserved Plasmodium protein, unknown function	unknown
PBANKA_0510800	conserved Plasmodium protein, unknown function	unknown
PBANKA_0512700	conserved Plasmodium protein, unknown function	unknown
PBANKA_0513500	conserved Plasmodium protein, unknown function	unknown
PBANKA_0520100	conserved Plasmodium protein, unknown function	unknown
PBANKA_0522300	conserved Plasmodium protein, unknown function	unknown
PBANKA_0523400	conserved Plasmodium protein, unknown function	unknown
PBANKA_0602900	conserved Plasmodium protein, unknown function	unknown
PBANKA_0605600	conserved Plasmodium protein, unknown function	unknown
PBANKA_0605900	conserved Plasmodium protein, unknown function	unknown
PBANKA_0607000	conserved Plasmodium protein, unknown function	unknown
PBANKA_0612700	conserved Plasmodium protein, unknown function	unknown
PBANKA_0618500	conserved Plasmodium protein, unknown function	unknown
PBANKA_0619000	conserved Plasmodium protein, unknown function	unknown
PBANKA_0620700	conserved Plasmodium protein, unknown function	unknown
PBANKA_0621600	conserved Plasmodium protein, unknown function	unknown
PBANKA_0703500	conserved Plasmodium protein, unknown function	unknown
PBANKA_0704700	conserved Plasmodium protein, unknown function	unknown
PBANKA_0708200	conserved Plasmodium protein, unknown function	unknown
PBANKA_0716100	conserved Plasmodium protein, unknown function	unknown
PBANKA_0718900	conserved Plasmodium protein, unknown function	unknown
PBANKA_0719100	conserved Plasmodium protein, unknown function	unknown
PBANKA_0721600	conserved Plasmodium protein, unknown function	unknown
PBANKA_0801100	conserved Plasmodium protein, unknown function	unknown
PBANKA_0803700	conserved Plasmodium protein, unknown function	unknown
PBANKA_0804100	conserved Plasmodium protein, unknown function	unknown
PBANKA_0807500	conserved Plasmodium protein, unknown function	unknown
PBANKA_0812600	conserved Plasmodium protein, unknown function	unknown
PBANKA_0812900	conserved Plasmodium protein, unknown function	unknown
PBANKA_0813100	conserved Plasmodium protein, unknown function	unknown
PBANKA_0813700	conserved Plasmodium protein, unknown function	unknown
PBANKA_0821200	conserved Plasmodium protein, unknown function	unknown
PBANKA_0822800	conserved Plasmodium protein, unknown function	unknown
PBANKA_0825400	conserved Plasmodium protein, unknown function	unknown
PBANKA_0825500	conserved Plasmodium protein, unknown function	unknown
PBANKA_0825900	conserved Plasmodium protein, unknown function	unknown
PBANKA_0829400	conserved Plasmodium protein, unknown function	unknown
PBANKA_0831500	conserved Plasmodium protein, unknown function	unknown
PBANKA_0831600	conserved Plasmodium protein, unknown function	unknown
PBANKA_0834200	conserved Plasmodium protein, unknown function	unknown
PBANKA_0901700	conserved Plasmodium protein, unknown function	unknown
PBANKA_0909200	conserved Plasmodium protein, unknown function	unknown
PBANKA_0912500	conserved Plasmodium protein, unknown function	unknown
PBANKA_0915400	conserved Plasmodium protein, unknown function	unknown
PBANKA_0916900	conserved Plasmodium protein, unknown function	unknown
PBANKA_0920300	conserved Plasmodium protein, unknown function	unknown
PBANKA_0921000	conserved Plasmodium protein, unknown function	unknown
PBANKA_0927500	conserved Plasmodium protein, unknown function	unknown
PBANKA_0927600	conserved Plasmodium protein, unknown function	unknown
PBANKA_0933800	conserved Plasmodium protein, unknown function	unknown
PBANKA_0934400	conserved Plasmodium protein, unknown function	unknown
PBANKA_0938000	conserved Plasmodium protein, unknown function	unknown
PBANKA_0940000	conserved Plasmodium protein, unknown function	unknown
PBANKA_0940500	conserved Plasmodium protein, unknown function	unknown
PBANKA_1005300	conserved Plasmodium protein, unknown function	unknown
PBANKA_1008700	conserved Plasmodium protein, unknown function	unknown
PBANKA_1015800	conserved Plasmodium protein, unknown function	unknown
PBANKA_1018700	conserved Plasmodium protein, unknown function	unknown
PBANKA_1018800	conserved Plasmodium protein, unknown function	unknown
PBANKA_1020000	conserved Plasmodium protein, unknown function	unknown
PBANKA_1021200	conserved Plasmodium protein, unknown function	unknown
PBANKA_1023800	conserved Plasmodium protein, unknown function	unknown
PBANKA_1028500	conserved Plasmodium protein, unknown function	unknown
PBANKA_1034800	conserved Plasmodium protein, unknown function	unknown
PBANKA_1105300	conserved Plasmodium protein, unknown function	unknown
PBANKA_1106000	conserved Plasmodium protein, unknown function	unknown
PBANKA_1107500	conserved Plasmodium protein, unknown function	unknown
PBANKA_1109300	conserved Plasmodium protein, unknown function	unknown
PBANKA_1110200	conserved Plasmodium protein, unknown function	unknown
PBANKA_1114100	conserved Plasmodium protein, unknown function	unknown
PBANKA_1120100	conserved Plasmodium protein, unknown function	unknown
PBANKA_1121000	conserved Plasmodium protein, unknown function	unknown
PBANKA_1129200	conserved Plasmodium protein, unknown function	unknown
PBANKA_1129900	conserved Plasmodium protein, unknown function	unknown
PBANKA_1130600	conserved Plasmodium protein, unknown function	unknown
PBANKA_1131500	conserved Plasmodium protein, unknown function	unknown
PBANKA_1132300	conserved Plasmodium protein, unknown function	unknown
PBANKA_1132800	conserved Plasmodium protein, unknown function	unknown
PBANKA_1135800	conserved Plasmodium protein, unknown function	unknown
PBANKA_1136100	conserved Plasmodium protein, unknown function	unknown
PBANKA_1137400	conserved Plasmodium protein, unknown function	unknown
PBANKA_1138800	conserved Plasmodium protein, unknown function	unknown
PBANKA_1139100	conserved Plasmodium protein, unknown function	unknown
PBANKA_1142100	conserved Plasmodium protein, unknown function	unknown
PBANKA_1143800	conserved Plasmodium protein, unknown function	unknown
PBANKA_1145200	conserved Plasmodium protein, unknown function	unknown
PBANKA_1145300	conserved Plasmodium protein, unknown function	unknown
PBANKA_1203450	conserved Plasmodium protein, unknown function	unknown
PBANKA_1207400	conserved Plasmodium protein, unknown function	unknown
PBANKA_1211700	conserved Plasmodium protein, unknown function	unknown
PBANKA_1212000	conserved Plasmodium protein, unknown function	unknown
PBANKA_1215900	conserved Plasmodium protein, unknown function	unknown
PBANKA_1223000	conserved Plasmodium protein, unknown function	unknown
PBANKA_1224900	conserved Plasmodium protein, unknown function	unknown
PBANKA_1236200	conserved Plasmodium protein, unknown function	unknown
PBANKA_1238900	conserved Plasmodium protein, unknown function	unknown
PBANKA_1244400	conserved Plasmodium protein, unknown function	unknown
PBANKA_1245500	conserved Plasmodium protein, unknown function	unknown
PBANKA_1303900	conserved Plasmodium protein, unknown function	unknown
PBANKA_1309800	conserved Plasmodium protein, unknown function	unknown
PBANKA_1312900	conserved Plasmodium protein, unknown function	unknown
PBANKA_1318500	conserved Plasmodium protein, unknown function	unknown
PBANKA_1320100	conserved Plasmodium protein, unknown function	unknown
PBANKA_1324800	conserved Plasmodium protein, unknown function	unknown
PBANKA_1325400	conserved Plasmodium protein, unknown function	unknown
PBANKA_1325500	conserved Plasmodium protein, unknown function	unknown
PBANKA_1327900	conserved Plasmodium protein, unknown function	unknown
PBANKA_1329900	conserved Plasmodium protein, unknown function	unknown
PBANKA_1335000	conserved Plasmodium protein, unknown function	unknown
PBANKA_1336900	conserved Plasmodium protein, unknown function	unknown
PBANKA_1337900	conserved Plasmodium protein, unknown function	unknown
PBANKA_1339800	conserved Plasmodium protein, unknown function	unknown
PBANKA_1343700	conserved Plasmodium protein, unknown function	unknown
PBANKA_1344600	conserved Plasmodium protein, unknown function	unknown
PBANKA_1349300	conserved Plasmodium protein, unknown function	unknown
PBANKA_1351300	conserved Plasmodium protein, unknown function	unknown
PBANKA_1353800	conserved Plasmodium protein, unknown function	unknown
PBANKA_1353900	conserved Plasmodium protein, unknown function	unknown
PBANKA_1356100	conserved Plasmodium protein, unknown function	unknown
PBANKA_1361800	conserved Plasmodium protein, unknown function	unknown
PBANKA_1362300	conserved Plasmodium protein, unknown function	unknown
PBANKA_1362400	conserved Plasmodium protein, unknown function	unknown
PBANKA_1362800	conserved Plasmodium protein, unknown function	unknown
PBANKA_1363600	conserved Plasmodium protein, unknown function	unknown
PBANKA_1364100	conserved Plasmodium protein, unknown function	unknown
PBANKA_1404300	conserved Plasmodium protein, unknown function	unknown
PBANKA_1406500	conserved Plasmodium protein, unknown function	unknown
PBANKA_1406900	conserved Plasmodium protein, unknown function	unknown
PBANKA_1407000	conserved Plasmodium protein, unknown function	unknown
PBANKA_1408600	conserved Plasmodium protein, unknown function	unknown
PBANKA_1414800	conserved Plasmodium protein, unknown function	unknown
PBANKA_1416100	conserved Plasmodium protein, unknown function	unknown
PBANKA_1417400	conserved Plasmodium protein, unknown function	unknown
PBANKA_1419300	conserved Plasmodium protein, unknown function	unknown
PBANKA_1421500	conserved Plasmodium protein, unknown function	unknown
PBANKA_1422800	conserved Plasmodium protein, unknown function	unknown
PBANKA_1430300	conserved Plasmodium protein, unknown function	unknown
PBANKA_1430600	conserved Plasmodium protein, unknown function	unknown
PBANKA_1436300	conserved Plasmodium protein, unknown function	unknown
PBANKA_1437700	conserved Plasmodium protein, unknown function	unknown
PBANKA_1437800	conserved Plasmodium protein, unknown function	unknown
PBANKA_1443100	conserved Plasmodium protein, unknown function	unknown
PBANKA_1444200	conserved Plasmodium protein, unknown function	unknown
PBANKA_1445700	conserved Plasmodium protein, unknown function	unknown
PBANKA_1447300	conserved Plasmodium protein, unknown function	unknown
PBANKA_1449100	conserved Plasmodium protein, unknown function	unknown
PBANKA_1450800	conserved Plasmodium protein, unknown function	unknown
PBANKA_1451100	conserved Plasmodium protein, unknown function	unknown
PBANKA_1451500	conserved Plasmodium protein, unknown function	unknown
PBANKA_1451700	conserved Plasmodium protein, unknown function	unknown
PBANKA_1451800	conserved Plasmodium protein, unknown function	unknown
PBANKA_1452100	conserved Plasmodium protein, unknown function	unknown
PBANKA_1452700	conserved Plasmodium protein, unknown function	unknown
PBANKA_1455700	conserved Plasmodium protein, unknown function	unknown
PBANKA_1461300	conserved Plasmodium protein, unknown function	unknown
PBANKA_1463300	conserved Plasmodium protein, unknown function	unknown
PBANKA_0301300	conserved protein, unknown function	unknown
PBANKA_0310700	conserved protein, unknown function	unknown
PBANKA_0409500	conserved protein, unknown function	unknown
PBANKA_0417800	conserved protein, unknown function	unknown
PBANKA_0510100	conserved protein, unknown function	unknown
PBANKA_0603700	conserved protein, unknown function	unknown
PBANKA_0622800	conserved protein, unknown function	unknown
PBANKA_0702000	conserved protein, unknown function	unknown
PBANKA_0703300	conserved protein, unknown function	unknown
PBANKA_0713200	conserved protein, unknown function	unknown
PBANKA_0717100	conserved protein, unknown function	unknown
PBANKA_0721000	conserved protein, unknown function	unknown
PBANKA_0803800	conserved protein, unknown function	unknown
PBANKA_0809700	conserved protein, unknown function	unknown
PBANKA_0823200	conserved protein, unknown function	unknown
PBANKA_0924000	conserved protein, unknown function	unknown
PBANKA_0926800	conserved protein, unknown function	unknown
PBANKA_0929200	conserved protein, unknown function	unknown
PBANKA_0931100	conserved protein, unknown function	unknown
PBANKA_0932600	conserved protein, unknown function	unknown
PBANKA_0934800	conserved protein, unknown function	unknown
PBANKA_0935600	conserved protein, unknown function	unknown
PBANKA_1026000	conserved protein, unknown function	unknown
PBANKA_1026300	conserved protein, unknown function	unknown
PBANKA_1108000	conserved protein, unknown function	unknown
PBANKA_1112700	conserved protein, unknown function	unknown
PBANKA_1115000	conserved protein, unknown function	unknown
PBANKA_1116100	conserved protein, unknown function	unknown
PBANKA_1123300	conserved protein, unknown function	unknown
PBANKA_1133900	conserved protein, unknown function	unknown
PBANKA_1138600	conserved protein, unknown function	unknown
PBANKA_1209900	conserved protein, unknown function	unknown
PBANKA_1217500	conserved protein, unknown function	unknown
PBANKA_1217900	conserved protein, unknown function	unknown
PBANKA_1218600	conserved protein, unknown function	unknown
PBANKA_1220400	conserved protein, unknown function	unknown
PBANKA_1229900	conserved protein, unknown function	unknown
PBANKA_1243500	conserved protein, unknown function	unknown
PBANKA_1312100	conserved protein, unknown function	unknown
PBANKA_1313300	conserved protein, unknown function	unknown
PBANKA_1318600	conserved protein, unknown function	unknown
PBANKA_1328800	conserved protein, unknown function	unknown
PBANKA_1329400	conserved protein, unknown function	unknown
PBANKA_1338100	conserved protein, unknown function	unknown
PBANKA_1338800	conserved protein, unknown function	unknown
PBANKA_1342300	conserved protein, unknown function	unknown
PBANKA_1346900	conserved protein, unknown function	unknown
PBANKA_1352400	conserved protein, unknown function	unknown
PBANKA_1360400	conserved protein, unknown function	unknown
PBANKA_1400900	conserved protein, unknown function	unknown
PBANKA_1404700	conserved protein, unknown function	unknown
PBANKA_1415200	conserved protein, unknown function	unknown
PBANKA_1416000	conserved protein, unknown function	unknown
PBANKA_1430700	conserved protein, unknown function	unknown
PBANKA_1432600	conserved protein, unknown function	unknown
PBANKA_1449700	conserved protein, unknown function	unknown
PBANKA_1453900	conserved protein, unknown function	unknown
PBANKA_1457900	conserved protein, unknown function	unknown
PBANKA_1461200	conserved protein, unknown function	unknown

## Sheet: 3b
Supplementary file 3b. sAP2-FG target genes predicted from ChIP-seq peaks.
ID	annotation	classification	classification 2	targets of PFG/cAP2-FG
PBANKA_1431050	10 kDa chaperonin, putative	protein synthesis
PBANKA_0712600	14-3-3 protein	signal		●
PBANKA_0807600	40S ribosomal protein S11, putative	protein synthesis
PBANKA_0522800	40S ribosomal protein S19, putative	protein synthesis		●
PBANKA_0315600	40S ribosomal protein S30, putative	protein synthesis
PBANKA_1215600	40S ribosomal protein S3A, putative	protein synthesis		●
PBANKA_1310800	40S ribosomal protein S5, putative	protein synthesis
PBANKA_0717800	60S ribosomal protein L15, putative	protein synthesis		●
PBANKA_1359600	6-cysteine protein	other
PBANKA_1359700	6-cysteine protein P47	female gametocyte	gametocyte	●
PBANKA_1226700	AAA family ATPase, putative	other
PBANKA_1459300	actin I	female gametocyte	zygote/ookinete	●
PBANKA_1103100	actin-depolymerizing factor 1	female gametocyte	zygote/ookinete	●
PBANKA_0209300	actin-related protein ARP1	other		●
PBANKA_0513600	adenosine deaminase, putative	metabolism		●
PBANKA_1108600	alpha-soluble NSF attachment protein, putative	protein transport
PBANKA_1015500	AP2 domain transcription factor AP2-O3	female gametocyte	gametocyte	●
PBANKA_0407600	asparagine synthetase [glutamine-hydrolyzing]	metabolism		●
PBANKA_1009100	ataxin-2 like protein, putative	other		●
PBANKA_0803500	ATP synthase subunit C, putative	other
PBANKA_0405000	ATP synthase-associated protein, putative	other
PBANKA_0705200	ATP synthase-associated protein, putative	other
PBANKA_1315400	calcineurin subunit B, putative	other
PBANKA_0314200	calcium-dependent protein kinase 1	female gametocyte	zygote/ookinete	●
PBANKA_0615200	calcium-dependent protein kinase 4	signal
PBANKA_0834000	calcyclin-binding protein, putative	proteolysis
PBANKA_1010600	calmodulin, putative	signal		●
PBANKA_1432300	cell traversal protein for ookinetes and sporozoites	female gametocyte	zygote/ookinete
PBANKA_0206300	centrin-1, putative	other
PBANKA_1344300	chromatin assembly factor 1 subunit B, putative	chromatin
PBANKA_0203000	chromatin assembly factor 1 subunit C, putative	chromatin
PBANKA_0403200	circumsporozoite (CS) protein	other
PBANKA_1412000	Clu domain-containing protein, putative	mitochondria		●
PBANKA_0902300	conserved Plasmodium protein, unknown function	female gametocyte	gametocyte	●
PBANKA_0612400	conserved Plasmodium protein, unknown function	female gametocyte	zygote/ookinete	●
PBANKA_0906600	coproporphyrinogen-III oxidase, putative	other		●
PBANKA_0213700	COX assembly mitochondrial protein, putative	mitochondria
PBANKA_1135700	CUGBP Elav-like family member 1, putative	mRNA regulation		●
PBANKA_0207500	cyclin-dependent kinases regulatory subunit, putative	signal		●
PBANKA_0614300	cysteine desulfurase	other
PBANKA_0211300	cysteine desulfurase IscS, putative	mitochondria		●
PBANKA_1300800	cysteine repeat modular protein 4	other
PBANKA_0836300	cytoadherence linked asexual protein 9	other
PBANKA_1400600	cytoadherence linked asexual protein, putative	other
PBANKA_1021400	cytochrome c oxidase assembly protein COX14, putative	mitochondria
PBANKA_0404900	cytochrome c oxidase subunit 6c, putative	mitochondria
PBANKA_1039700	cytochrome c oxidase subunit ApiCOX19, putative	mitochondria		●
PBANKA_1326300	cytochrome c1, heme protein, mitochondrial, putative	mitochondria		●
PBANKA_0312700	DEAD/DEAH box helicase, putative	other
PBANKA_0516300	DER1-like protein, putative	proteolysis
PBANKA_1331800	derlin-1, putative	protein transport		●
PBANKA_0931300	dipeptidyl aminopeptidase 1, putative	proteolysis		●
PBANKA_0804300	DNA mismatch repair protein MSH2	DNA replication and repair
PBANKA_1415600	DNA replication licensing factor MCM4, putative	DNA replication and repair
PBANKA_0404100	DNA-(apurinic or apyrimidinic site) endonuclease, putative	other		●
PBANKA_1204400	DNA/RNA-binding protein Alba 3, putative	female gametocyte	zygote/ookinete	●
PBANKA_0401900	DNA-directed RNA polymerases I, II, and III subunit RPABC2, putative	protein synthesis		●
PBANKA_0621000	dynactin subunit 5, putative	protein transport		●
PBANKA_1429400	dynein light chain 1, putative	other
PBANKA_0201600	early transcribed membrane protein	other
PBANKA_1038800	EGF domain-containing protein, putative	signal		●
PBANKA_1133300	elongation factor 1-alpha	protein synthesis
PBANKA_1133400	elongation factor 1-alpha	protein synthesis
PBANKA_1345600	elongation factor Tu, putative	protein synthesis		●
PBANKA_0104700	elongation of fatty acids protein, putative	metabolism
PBANKA_0818900	endoplasmic reticulum chaperone BiP, putative	protein synthesis		●
PBANKA_0924300	endoplasmic reticulum oxidoreductin, putative	protein synthesis		●
PBANKA_0938400	endoplasmic reticulum-resident calcium binding protein, putative	protein transport		●
PBANKA_1437300	endoplasmin, putative	protein synthesis
PBANKA_1345400	ER lumen protein retaining receptor 1, putative	protein transport		●
PBANKA_1232400	F-actin-capping protein subunit beta	female gametocyte	zygote/ookinete	●
PBANKA_0504300	flagellar outer arm dynein-associated protein, putative	other		●
PBANKA_0830400	G2 protein	female gametocyte	zygote/ookinete
PBANKA_1312700	gamete egress and sporozoite traversal protein	female gametocyte	gametocyte	●
PBANKA_1115200	gamete egress protein GEP	female gametocyte	gametocyte	●
PBANKA_1338900	glideosome associated protein with multiple membrane spans 1, putative	female gametocyte	zygote/ookinete	●
PBANKA_0523900	glideosome associated protein with multiple membrane spans 2, putative	female gametocyte	zygote/ookinete	●
PBANKA_1035400	glideosome associated protein with multiple membrane spans 3, putative	female gametocyte	zygote/ookinete	●
PBANKA_1115300	glideosome-associated protein 40, putative	female gametocyte	zygote/ookinete	●
PBANKA_1009500	glutamate synthase [NADH], putative	other
PBANKA_1310700	glutaminyl-peptide cyclotransferase, putative	other
PBANKA_1023900	glutathione S-transferase, putative	other
PBANKA_1364300	glycerol kinase, putative	metabolism		●
PBANKA_1035900	glycerophosphodiester phosphodiesterase, putative	metabolism
PBANKA_0410400	glycogen synthase kinase 3, putative	metabolism		●
PBANKA_1345700	GPI transamidase subunit PIG-U, putative	protein synthesis		●
PBANKA_0403700	GRIP domain-containing protein, putative	other		●
PBANKA_0417400	GTPase-activating protein, putative	other
PBANKA_1214000	heat shock protein 60, putative	protein synthesis		●
PBANKA_0711900	heat shock protein 70	protein synthesis		●
PBANKA_0805700	heat shock protein 90, putative	protein synthesis		●
PBANKA_1126800	HECT domain-containing protein 1, putative	proteolysis		●
PBANKA_1448800	helicase, putative	other		●
PBANKA_0513800	heptatricopeptide repeat and RAP domain-containing protein, putative	other
PBANKA_0601900	high mobility group protein B1, putative	chromatin		●
PBANKA_0712900	high mobility group protein B2	chromatin		●
PBANKA_0830200	high molecular weight rhoptry protein 2	other		●
PBANKA_0416000	high molecular weight rhoptry protein 3, putative	other
PBANKA_1117000	histone H2A, putative	chromatin		●
PBANKA_1217600	histone H2A.Z, putative	chromatin
PBANKA_0941800	histone H2B, putative	chromatin		●
PBANKA_1117100	histone H3 variant, putative	chromatin		●
PBANKA_0108800	histone H3, putative	chromatin		●
PBANKA_0941900	histone H4, putative	chromatin		●
PBANKA_1131800	histone-lysine N-methyltransferase, putative	chromatin
PBANKA_0411700	HSP20-like chaperone, putative	protein synthesis
PBANKA_1204200	IMP1-like protein, putative	other		●
PBANKA_0803600	importin-7, putative	protein transport
PBANKA_0813000	inhibitor of cysteine proteases	other
PBANKA_1202000	inner membrane complex protein 1c	female gametocyte	zygote/ookinete	●
PBANKA_0402700	inner membrane complex protein 1e	female gametocyte	zygote/ookinete	●
PBANKA_0707100	inner membrane complex protein 1i	female gametocyte	zygote/ookinete	●
PBANKA_0513000	inner membrane complex protein 1m, putative	female gametocyte	zygote/ookinete	●
PBANKA_1311300	inner membrane complex protein, putative	female gametocyte	zygote/ookinete	●
PBANKA_1209400	inner membrane complex sub-compartment protein 1	female gametocyte	zygote/ookinete	●
PBANKA_1429200	kelch domain-containing protein, putative	other
PBANKA_0609500	kinesin-X3, putative	female gametocyte	zygote/ookinete	●
PBANKA_0617000	LEM3/CDC50 family protein, putative	other		●
PBANKA_1016700	leucine-rich repeat protein	other
PBANKA_1309900	M17 leucyl aminopeptidase, putative	proteolysis
PBANKA_0703000	magnesium transporter, putative	transporter		●
PBANKA_0817000	major facilitator superfamily domain-containing protein, putative	transporter		●
PBANKA_0208400	major facilitator superfamily-related transporter, putative	transporter		●
PBANKA_1117700	malate dehydrogenase, putative	metabolism		●
PBANKA_1432200	male development gene 1	female gametocyte	gametocyte	●
PBANKA_1403500	MCL1 domain-containing protein, putative	other
PBANKA_1429000	mediator of RNA polymerase II transcription subunit 18, putative	other
PBANKA_0714000	meiotic recombination protein DMC1	female gametocyte	zygote/ookinete	●
PBANKA_0831000	merozoite surface protein 1	other
PBANKA_1443300	merozoite surface protein 9, putative	other
PBANKA_0702300	mitochondrial inner membrane protein OXA1, putative	mitochondria		●
PBANKA_1354200	mitochondrial pyruvate carrier protein 1, putative	mitochondria		●
PBANKA_1233500	mRNA-binding protein PUF1	mRNA regulation		●
PBANKA_1349000	MSP7-like protein	other
PBANKA_1349100	MSP7-like protein	other
PBANKA_1349200	MSP7-like protein	other		●
PBANKA_1311700	multidrug resistance protein 2, putative	other
PBANKA_1459500	myosin A-tail interacting protein	female gametocyte	zygote/ookinete
PBANKA_0611800	N-acetyltransferase, GNAT family, putative	other
PBANKA_1007100	NAD(P)-binding protein, putative	other
PBANKA_1240700	NIMA related kinase 2	female gametocyte	zygote/ookinete
PBANKA_0600600	NIMA related kinase 3, putative	signal		●
PBANKA_1403300	NLI interacting factor-like phosphatase	other		●
PBANKA_1310200	nucleoporin NUP313	other
PBANKA_0905200	oocyst capsule protein Cap93	other		●
PBANKA_0902500	oocyst rupture protein 1	other		●
PBANKA_0515000	ookinete surface protein P25	female gametocyte	zygote/ookinete	●
PBANKA_0514900	ookinete surface protein P28	female gametocyte	zygote/ookinete	●
PBANKA_0107400	ornithine aminotransferase, putative	metabolism
PBANKA_1463000	osmiophilic body protein G377	female gametocyte	gametocyte	●
PBANKA_0402000	palmitoyltransferase DHHC1, putative	female gametocyte	zygote/ookinete	●
PBANKA_0312600	palmitoyltransferase DHHC11, putative	other
PBANKA_1350500	parasitophorous vacuolar protein 3	other
PBANKA_0502600	peptidase, putative	proteolysis		●
PBANKA_0932200	peptidyl-prolyl cis-trans isomerase, putative	other
PBANKA_1432400	perforin-like protein 2	female gametocyte	gametocyte	●
PBANKA_0918600	phosphatidylinositol-4-phosphate 5-kinase, putative	metabolism		●
PBANKA_0408400	phosphoglycerate mutase, putative	metabolism		●
PBANKA_0802100	phosphoinositide-binding protein, putative	other
PBANKA_1422900	PIMMS22 protein	female gametocyte	zygote/ookinete	●
PBANKA_1222500	plasmepsin X, putative	proteolysis		●
PBANKA_0700800	Plasmodium exported protein (PHIST), unknown function	other
PBANKA_0214700	Plasmodium exported protein, unknown function	other
PBANKA_1200600	Plasmodium exported protein, unknown function	other
PBANKA_1400700	Plasmodium exported protein, unknown function	other		●
PBANKA_0610300	polyubiquitin, putative	proteolysis		●
PBANKA_1452800	pre-mRNA-splicing factor CWC22, putative	protein synthesis		●
PBANKA_0833000	profilin	female gametocyte	zygote/ookinete
PBANKA_0621100	proteasome assembly chaperone 4, putative	proteolysis		●
PBANKA_1411200	protein AAP2, putative	other
PBANKA_1108500	protein AAP6, putative	other
PBANKA_1209700	protein ARV1, putative	other
PBANKA_0702800	protein disulfide-isomerase, putative	protein synthesis
PBANKA_1218500	protein phosphatase inhibitor 2, putative	other
PBANKA_1359000	protein transport protein SEC61 subunit alpha, putative	protein transport
PBANKA_1318800	protein tyrosine phosphatase	other		●
PBANKA_1113000	purine nucleoside phosphorylase, putative	metabolism
PBANKA_1346800	Qa-SNARE protein, putative	protein transport		●
PBANKA_0508800	RAP protein, putative	other
PBANKA_0822200	RAP protein, putative	other
PBANKA_1131700	RAP protein, putative	other
PBANKA_1354100	ras-related protein Rab-11B, putative	protein transport		●
PBANKA_0904100	ras-related protein Rab-6	protein transport
PBANKA_0316000	replication factor C subunit 1, putative	DNA replication and repair
PBANKA_0107000	respiratory chain complex 4 associated protein 4, putative	mitochondria		●
PBANKA_0804500	rhoptry-associated membrane antigen, putative	other
PBANKA_1032100	rhoptry-associated protein 1	other
PBANKA_1214200	ribonucleoside-diphosphate reductase small chain, putative	metabolism		●
PBANKA_1036600	ribonucleoside-diphosphate reductase small chain, putative	other		●
PBANKA_0940800	ribosomal protein S15, apicoplast, putative	protein synthesis
PBANKA_0911600	ribosomal protein S9, mitochondrial, putative	protein synthesis
PBANKA_1026900	ribosomal RNA small subunit methyltransferase A1, putative	protein synthesis		●
PBANKA_0315800	ribosome associated membrane protein RAMP4, putative	other
PBANKA_0925000	RING zinc finger protein, putative	proteolysis		●
PBANKA_1244300	RING zinc finger protein, putative	proteolysis
PBANKA_0705300	SAYSvFN domain-containing protein, putative	other
PBANKA_0306900	Sec61-gamma subunit of protein translocation complex, putative	protein transport		●
PBANKA_1113400	secreted ookinete protein	female gametocyte	zygote/ookinete	●
PBANKA_0619200	secreted ookinete protein, putative	female gametocyte	zygote/ookinete	●
PBANKA_0210300	seipin domain-containing protein, putative	other
PBANKA_1450200	serine hydroxymethyltransferase, putative	metabolism
PBANKA_1027000	serine palmitoyltransferase, putative	other		●
PBANKA_0305100	serine repeat antigen 1	other
PBANKA_0305000	serine repeat antigen 2	other
PBANKA_1460500	serine/threonine protein kinase, putative	signal		●
PBANKA_1320700	signal peptide peptidase, putative	other		●
PBANKA_0910900	sporozoite surface protein essential for liver stage development	other
PBANKA_1002500	sporozoite-specific protein S10	other
PBANKA_1110700	stearoyl-CoA desaturase, putative	metabolism		●
PBANKA_0921800	steryl ester hydrolase, putative	other
PBANKA_0810700	subpellicular microtubule protein 1, putative	female gametocyte	zygote/ookinete	●
PBANKA_1107100	subtilisin-like protease 1	proteolysis		●
PBANKA_1013200	succinate--CoA ligase [ADP-forming] subunit beta, putative	metabolism		●
PBANKA_0313300	sugar transporter, putative	transporter		●
PBANKA_0604400	targeted glyoxalase II, putative	metabolism
PBANKA_0607700	telomere repeat-binding zinc finger protein, putative	chromatin		●
PBANKA_0825700	telomeric repeat binding factor 1, putative	chromatin		●
PBANKA_0817100	thioredoxin 3, putative	other
PBANKA_1444800	thioredoxin-like associated protein 1, putative	female gametocyte	zygote/ookinete	●
PBANKA_1024000	thioredoxin-like protein, putative	other
PBANKA_1365200	thioredoxin-related protein, putative	other		●
PBANKA_1456900	translation initiation factor SUI1, putative	protein synthesis		●
PBANKA_1038300	translocation associated membrane protein, putative	protein transport
PBANKA_1205200	transmembrane protein 147, putative	other
PBANKA_0403800	transporter, putative	other
PBANKA_0524300	tryptophan-rich protein	other
PBANKA_0623100	tryptophan-rich protein	other
PBANKA_1206900	tubulin beta chain, putative	female gametocyte	zygote/ookinete	●
PBANKA_1214100	tubulin binding cofactor c, putative	female gametocyte	zygote/ookinete	●
PBANKA_0204200	tubulin-specific chaperone a, putative	female gametocyte	zygote/ookinete
PBANKA_0816000	type II NADH:ubiquinone oxidoreductase	mitochondria
PBANKA_0927000	tyrosine kinase-like protein, putative	signal
PBANKA_1362100	tyrosine kinase-like protein, putative	signal		●
PBANKA_0704100	ubiquitin conjugation factor E4 B, putative	proteolysis
PBANKA_1222400	ubiquitin regulatory protein, putative	proteolysis
PBANKA_1132600	ubiquitin-conjugating enzyme E2, putative	proteolysis
PBANKA_0410800	ubiquitin-protein ligase, putative	proteolysis
PBANKA_1449300	upregulated in late gametocytes ULG8, putative	female gametocyte	zygote/ookinete	●
PBANKA_1233400	WD repeat-containing protein 26, putative	other
PBANKA_0503500	zinc finger protein, putative	other		●
PBANKA_0712300	zinc finger protein, putative	proteolysis		●
PBANKA_1239000	conserved Plasmodium membrane protein, unknown function	unknown		●
PBANKA_0110100	conserved Plasmodium protein, unknown function	unknown		●
PBANKA_0111300	conserved Plasmodium protein, unknown function	unknown		●
PBANKA_0312100	conserved Plasmodium protein, unknown function	unknown
PBANKA_0315700	conserved Plasmodium protein, unknown function	unknown
PBANKA_0410700	conserved Plasmodium protein, unknown function	unknown
PBANKA_0413500	conserved Plasmodium protein, unknown function	unknown		●
PBANKA_0502650	conserved Plasmodium protein, unknown function	unknown		●
PBANKA_0505400	conserved Plasmodium protein, unknown function	unknown		●
PBANKA_0507200	conserved Plasmodium protein, unknown function	unknown
PBANKA_0509600	conserved Plasmodium protein, unknown function	unknown
PBANKA_0513500	conserved Plasmodium protein, unknown function	unknown		●
PBANKA_0516000	conserved Plasmodium protein, unknown function	unknown
PBANKA_0519100	conserved Plasmodium protein, unknown function	unknown
PBANKA_0704700	conserved Plasmodium protein, unknown function	unknown		●
PBANKA_0709800	conserved Plasmodium protein, unknown function	unknown
PBANKA_0800400	conserved Plasmodium protein, unknown function	unknown
PBANKA_0805300	conserved Plasmodium protein, unknown function	unknown
PBANKA_0808380	conserved Plasmodium protein, unknown function	unknown
PBANKA_0810300	conserved Plasmodium protein, unknown function	unknown
PBANKA_0812300	conserved Plasmodium protein, unknown function	unknown
PBANKA_0812600	conserved Plasmodium protein, unknown function	unknown		●
PBANKA_0814800	conserved Plasmodium protein, unknown function	unknown
PBANKA_0816900	conserved Plasmodium protein, unknown function	unknown
PBANKA_0822100	conserved Plasmodium protein, unknown function	unknown
PBANKA_0825900	conserved Plasmodium protein, unknown function	unknown		●
PBANKA_0834100	conserved Plasmodium protein, unknown function	unknown
PBANKA_0834200	conserved Plasmodium protein, unknown function	unknown		●
PBANKA_0906700	conserved Plasmodium protein, unknown function	unknown
PBANKA_0906800	conserved Plasmodium protein, unknown function	unknown
PBANKA_0915200	conserved Plasmodium protein, unknown function	unknown
PBANKA_0933800	conserved Plasmodium protein, unknown function	unknown		●
PBANKA_0934600	conserved Plasmodium protein, unknown function	unknown
PBANKA_1016600	conserved Plasmodium protein, unknown function	unknown
PBANKA_1020800	conserved Plasmodium protein, unknown function	unknown
PBANKA_1031500	conserved Plasmodium protein, unknown function	unknown
PBANKA_1105300	conserved Plasmodium protein, unknown function	unknown		●
PBANKA_1129200	conserved Plasmodium protein, unknown function	unknown		●
PBANKA_1138800	conserved Plasmodium protein, unknown function	unknown		●
PBANKA_1145000	conserved Plasmodium protein, unknown function	unknown
PBANKA_1145100	conserved Plasmodium protein, unknown function	unknown
PBANKA_1206000	conserved Plasmodium protein, unknown function	unknown
PBANKA_1236200	conserved Plasmodium protein, unknown function	unknown		●
PBANKA_1309800	conserved Plasmodium protein, unknown function	unknown		●
PBANKA_1318500	conserved Plasmodium protein, unknown function	unknown		●
PBANKA_1320800	conserved Plasmodium protein, unknown function	unknown
PBANKA_1324800	conserved Plasmodium protein, unknown function	unknown		●
PBANKA_1336200	conserved Plasmodium protein, unknown function	unknown
PBANKA_1344600	conserved Plasmodium protein, unknown function	unknown		●
PBANKA_1353800	conserved Plasmodium protein, unknown function	unknown		●
PBANKA_1406900	conserved Plasmodium protein, unknown function	unknown		●
PBANKA_1422800	conserved Plasmodium protein, unknown function	unknown		●
PBANKA_1425800	conserved Plasmodium protein, unknown function	unknown
PBANKA_1433700	conserved Plasmodium protein, unknown function	unknown
PBANKA_1436400	conserved Plasmodium protein, unknown function	unknown
PBANKA_1437900	conserved Plasmodium protein, unknown function	unknown
PBANKA_1442100	conserved Plasmodium protein, unknown function	unknown
PBANKA_1451100	conserved Plasmodium protein, unknown function	unknown		●
PBANKA_1451500	conserved Plasmodium protein, unknown function	unknown		●
PBANKA_1452700	conserved Plasmodium protein, unknown function	unknown		●
PBANKA_1461300	conserved Plasmodium protein, unknown function	unknown		●
PBANKA_0301300	conserved protein, unknown function	unknown		●
PBANKA_0403900	conserved protein, unknown function	unknown
PBANKA_0415900	conserved protein, unknown function	unknown
PBANKA_0508900	conserved protein, unknown function	unknown
PBANKA_0516100	conserved protein, unknown function	unknown
PBANKA_0622800	conserved protein, unknown function	unknown		●
PBANKA_0702000	conserved protein, unknown function	unknown		●
PBANKA_0702400	conserved protein, unknown function	unknown
PBANKA_0721000	conserved protein, unknown function	unknown		●
PBANKA_0823200	conserved protein, unknown function	unknown		●
PBANKA_0931100	conserved protein, unknown function	unknown		●
PBANKA_0934700	conserved protein, unknown function	unknown
PBANKA_1032800	conserved protein, unknown function	unknown
PBANKA_1343500	conserved protein, unknown function	unknown
PBANKA_1346900	conserved protein, unknown function	unknown		●
PBANKA_1360400	conserved protein, unknown function	unknown		●
PBANKA_1425900	conserved protein, unknown function	unknown
PBANKA_1449700	conserved protein, unknown function	unknown		●
PBANKA_1461200	conserved protein, unknown function	unknown		●
