# Supplementary material for: Coordinated regulation of gene expression in Plasmodium female gametocytes by two transcription factors
Source: eLife. 2024 Jan 22;12:RP88317. doi: 10.7554/eLife.88317 (PMC10945693; doi:10.7554/eLife.88317)
Supplement: Supplementary file 4. [file elife-88317-supp4.xlsx]

## Sheet: S4
Supplementary file 4. Primers used in this study
name	sequence
PFG GFP DHFR
PFG-GFP 5F	CGGGCCCCCCCTCGAGACAAAACCGGAGAAGAAAATACAG
PFG-GFP 5R	CTCCTTTACTGCTAGCCAAAATATTTGATATGTTTATAAAATTATTGTTAG
PFG-GFP 3F	CTTCAATTTCGGATCCGAAAACGAAGAGAATAACTGCAATC
PFG-GFP 3R	ACCGCGGTGGCGGCCGCGCAAAGTATGGAAACTGAAC
PFG-GFP CF	AACATACAGAATATCAATCTACTCATTATTCG
PFG-GFP CR	TATGTTATTTCTGTCTTAGTAAATGATTGCAG
GFP-R
PFG GFP DHPS
PFG-GFP 5F	CGGGCCCCCCCTCGAGACAAAACCGGAGAAGAAAATACAG
PFG-GFP 5R	CTCCTTTACTGCTAGCCAAAATATTTGATATGTTTATAAAATTATTGTTAG
PFG-GFP 3F	CTTCAATTTCGGATCCGAAAACGAAGAGAATAACTGCAATC
PFG-GFP 3R	ACCGCGGTGGCGGCCGCGCAAAGTATGGAAACTGAAC
PFG-GFP DHPS F	TTGGTATTTTGTCGACGATGCTTGTAGATGAGTTAAGC
PFG-GFP DHPS R	CTTCGTTTTCGGATCCGAAATTGAAGGAAAAAACATCATTTGTG
PFG-GFP CF	AACATACAGAATATCAATCTACTCATTATTCG
PFG-GFP CR	TATGTTATTTCTGTCTTAGTAAATGATTGCAG
GFP-R	CCGTATGTTGCATCACCTTCA
PFG KO DHFR
KO PFG-1	CGCTATATATTTTTCCATCTACATATCGCTG
KO PFG-2	CTCATCTACAAGCATCGTCGACGTGTTGTACTCATCTTTCATCACG
KO PFG-3	CCTTCAATTTCGGATCCACTAGCAGATAATTCAACTGAAATTCCTCAAG
KO PFG-4	GTCTTAGTAAATGATTGCAGTTATTCTCTTCG
PFG_CR	GTATTACTGTGTATGCGACGTG
PFG WT CF	AATACGTTCCTGAGGATACTATCG
DHFR 3F	CACAAATGATGTTTTTTCCTTCAATTTCG
PFG KO CRISPR
KO PFG-1	CGCTATATATTTTTCCATCTACATATCGCTG
KO PFG-4	GTCTTAGTAAATGATTGCAGTTATTCTCTTCG
PFG Donner R1	CAGTTGAATTATCTGGTGTTGTACTCATCTTTCATCACG
PFG donner F2	GAGTACAACACCAGATAATTCAACTGAAATTCCTCAAG
PFG oligo F	TATTGCTTTTTTCATTCTTACACAT
PFG oligo R	AAACATGTGTAAGAATGAAAAAAGC
PFG_CF	CACATTTAGAGCATTCAATGCAATTAC
PFG_CR	GTATTACTGTGTATGCGACGTG
PFG WT CF	AATACGTTCCTGAGGATACTATCG
AP2-FG-GFP Donner F1	TAGAACTAGTGGATCCGATAAAGGTCATATTATTCATGCTTTTCCAC
AP2-FG-GFP donner R1	CATCTCCATTTGAGATATATATGCAGTATTATTCGTAGGAATATTATATG
AP2-FG-GFP Donner F2	CTGCATATATATCTCAAATGGAGATGGCTAGCAGTAAAGGAGAAGAATTA
AP2-FG-GFP Donner R2	GAGGTAGATTATTTGTATAGTTCATCCATGCCATGTG
AP2-FG-GFP Donner F3	GGATGAACTATACAAATAATCTACCTCAAAAAAACTTAACTTTTTC
AP2-FG-GFP Donner R3	CGGGCCCCCCCTCGAGTTATGCATCCTATTTATATAACCATTTGTTGC
AP2-FG-GFP oligo F	TATTGAGGTAGATTACATTTCCATC
AP2-FG-GFP oligo R	AAACGATGGAAATGTAATCTACCTC
AP2-FG-GFP CF (2022)	GATGATGCTTTTAATGAAACCCATGAAACTAC
AP2-FG-GFP CR (2022)	TGAAACGAACGCAGAAAATTGGTG
GFP-F	AGAGTGCCATGCCCGAAGG
promoter assay
P28 pro R	TGCTCACCATCTCGAGACTGTATTTAAAATTCATTTTCGTG
P28 pro F	TATAGGGCGAATTGGGTACCAAATTCCAGTTCATATAAATTTTATTTC
P28 pro dmut F1	TAAAAAATGTAGAAAAATTTGTGTAAATGTG
p28 pro dmut R1	CACATTTACACAAATTTTTCTACATTTTTTATTGAGCATTC
ChIP qPCR
CPW-WPC_HR_F	TAGAACTAGTGGATCCGGGAGTATGGAACCCGGATATTACAG
CPW-WPC_HR_R	CGGGCCCCCCCTCGAGTCATCTTCGCTTATTTTTGGTGAATGC
CPW-WPC_cismut_F	CTATATTACAGCATTTCAATTTCAAAATGGAAGCAATAC
CPW-WPC_cismut_R	GTATTGCTTCCATTTTGAAATTGAAATGCTGTAATATAGAATcTAaATAgATAGAATGGAAG
CPW-WPC_gRNA_F	TATTgTAGAATGTATATACATAGAA
CPW-WPC_gRNA_R	AAACTTCTATGTATATACATTCTAc
CPW-WPC_donor_F	GGGAGTATGGAACCCGGATATTACAG
CPW-WPC_donor_R	TCATCTTCGCTTATTTTTGGTGAATGC
CPW-WPC_seq_F	TGGTTCTCAGTAATTTTTTTTGGACGATG
cpwwpc_cis_qPCR_F	CTCAGTAATTTTTTTTGGACGATG
cpwwpc_cis_qPCR_R	TCCATTTTGAAATTGAAATGCTG
CPW3_cis_qPCR_F	TGTGAGAAAGCTCATTACTTCG
CPW3_cis_qPCR_R	TGAGGGAGATCGAAATCGAG
TRAP_ChIP-qPCR_F	ATGTACATCTTGTGCTTGAAGC
TRAP_ChIP-qPCR_R	CCAACTGGCAACACTCAACA
NEK2_donor_vec_F	TAGAACTAGTGGATCCCATGCATATATGGAATATTTTTTTGGTTCAAAATCATAC
NEK2_mut_F	GGTAGTGTGTGTTTATTTTTTTATACATATTTTTAGaTaAACTCTTATTATGGAATTGTAAAATAATATATAATGG
NEK2_mut_R	CCATAATAAGAGTTtAtCTAAAAATATGTATAAAAAAATAAACACACACTACCTTATAAATTATATAGGTAGC
NEK2 donor_vec_R	CGGGCCCCCCCTCGAGCCATATGCCAAATTGTGTAGGTTCGATCTAATC
NEK2_donor_F	CATGCATATATGGAATATTTTTTTGGTTCAAAATCATAC
NEK2 donor_R	CCATATGCCAAATTGTGTAGGTTCGATC
NEK2_gRNA_F	TATTgTTTTAGCTCAACTCTTATTA
NEK2_gRNA_R	AAACTAATAAGAGTTGAGCTAAAAc
NEK2 qPCR F	gttaTTGTTCAATTGGTTTTTGCTACC
NEK2 qPCR short R	AATATGCACATATTATGCCATTCTTCAA
MTIP qPCR F	CCATATTTGCTTAAAGAAAACAGCTCA
MTIP qPCR R	GAAAGTCTCCAATGTTGTTTTATATAGC
IMC1i qPCR F	CAAATAATATCGAGGATATATTTGCTTAATCTG
IMC1i qPCR R	CAGTTAAAGGGGTTATAGTGTATGC
GST-AP2-FG
AP2-FGGEX-AP2domain-F	ggggcccctgggatccATCCCTAAAATTAAAGGAGTTCGttttgac
AP2-FGGEX-AP2domain-R	gatgcggccgctcgagTTATTTTTTTTGCATGCATTTAACAGC
